# Supplementary material for: Analysis of a Gene Regulatory Cascade Mediating Circadian Rhythm in Zebrafish
Source: PubMed Central journal article supplement (PMC3585402; doi:10.1371/journal.pcbi.1002940), 2013-02-28
Supplement: pcbi.1002940.s006.pdf [file pcbi.1002940.s006.pdf]

**Table S1: Zebrafish circadian oscillating genes**

| Gene Symbol | Gene ID | Gene Description                                                           | Fisher's g test p value (LD) | Fisher's g test p value (DD) | LD Phase | DD Phase | Phase * | FDR ** |
|-------------|---------|----------------------------------------------------------------------------|------------------------------|------------------------------|----------|----------|---------|--------|
| rbp4        | 30077   | retinol binding protein 4, plasma                                          | 8.98E-05                     | 2.06E-04                     | 8.3      | 8.2      | 8.3     | 0.001  |
| neurod      | 30169   | neurogenic differentiation                                                 | 1.17E-03                     | 1.11E-02                     | 10.5     | 13.3     | 11.9    | 0.001  |
| myog        | 30200   | myogenin                                                                   | 4.40E-02                     | 9.16E-03                     | 10.6     | 10.7     | 10.6    | 0.001  |
| spon2b      | 30202   | spondin 2b, extracellular matrix protein                                   | 2.31E-03                     | 3.81E-02                     | 19.3     | 19.7     | 19.5    | 0.001  |
| hsp47       | 30449   | heat shock protein 47                                                      | 2.10E-03                     | 2.20E-02                     | 5.3      | 4.8      | 5.0     | 0.001  |
| etv5b       | 30452   | ets variant 5b                                                             | 2.29E-04                     | 1.13E-03                     | 6.5      | 6.5      | 6.5     | 0.001  |
| cmyb        | 30519   | transcription factor cmyb                                                  | 1.36E-02                     | 2.01E-02                     | 8.3      | 10.7     | 9.5     | 0.001  |
| tef         | 30674   | thyrotroph embryonic factor                                                | 2.53E-02                     | 5.73E-03                     | 3.7      | 3.1      | 3.4     | 0.001  |
| irbp        | 30735   | interphotoreceptor retinoid-binding protein                                | 2.76E-04                     | 6.19E-04                     | 5.8      | 6.2      | 6.0     | 0.001  |
| hspe1       | 58041   | heat shock 10 protein 1 (chaperonin 10)                                    | 1.10E-03                     | 4.19E-02                     | 2.3      | 2.8      | 2.5     | 0.001  |
| arntl1a     | 58098   | aryl hydrocarbon receptor nuclear translocator-like 1a                     | 1.81E-04                     | 9.24E-04                     | 12.3     | 14.5     | 13.4    | 0.001  |
| arntl2      | 58099   | aryl hydrocarbon receptor nuclear translocator-like 2                      | 2.57E-02                     | 3.04E-02                     | 15.2     | 17.4     | 16.3    | 0.001  |
| per3        | 58107   | period homolog 3 (Drosophila)                                              | 2.51E-03                     | 2.07E-03                     | 3.8      | 4.5      | 4.2     | 0.001  |
| apaf1       | 58131   | apoptotic protease activating factor 1                                     | 1.17E-03                     | 3.84E-02                     | 12.3     | 14.8     | 13.6    | 0.001  |
| aox3        | 64265   | aldehyde oxidase 3                                                         | 4.95E-02                     | 4.07E-02                     | 6.5      | 4.8      | 5.7     | 0.001  |
| atp1a2a     | 64609   | ATPase, Na <sup>+</sup> /K <sup>+</sup> transporting, alpha 2a polypeptide | 1.00E-02                     | 1.15E-02                     | 0.9      | 1.9      | 1.4     | 0.001  |
| cldn15la    | 81591   | claudin 15-like a                                                          | 2.93E-02                     | 1.51E-02                     | 5.7      | 6.2      | 6.0     | 0.001  |
| bcl7bb      | 81595   | B-cell CLL/lymphoma 7B, b                                                  | 3.64E-02                     | 4.98E-02                     | 6.4      | 6.9      | 6.6     | 0.001  |
| bambia      | 83496   | BMP and activin membrane-bound inhibitor (Xenopus laevis)                  | 6.11E-03                     | 1.15E-02                     | 19.5     | 21.5     | 20.5    | 0.001  |
| cry3        | 83774   | cryptochrome 3                                                             | 4.15E-03                     | 3.94E-02                     | 1.5      | 2.8      | 2.2     | 0.001  |
| cry4        | 83775   | cryptochrome 4                                                             | 1.36E-03                     | 5.86E-03                     | 13.3     | 15.3     | 14.3    | 0.001  |
| cry2b       | 83780   | cryptochrome 2b                                                            | 2.80E-03                     | 1.57E-03                     | 12.9     | 15.4     | 14.1    | 0.001  |
| bcmo1       | 84039   | beta-carotene 15,15'-monooxygenase 1                                       | 2.92E-04                     | 1.06E-02                     | 4.7      | 3.3      | 4.0     | 0.001  |
| bcdo2l      | 84041   | beta-carotene 15, 15-dioxygenase 2, like                                   | 4.74E-04                     | 1.72E-02                     | 6.8      | 5.4      | 6.1     | 0.001  |
| bcl2l1      | 114401  | bcl2-like 1                                                                | 3.81E-04                     | 2.15E-02                     | 2.0      | 3.4      | 2.7     | 0.001  |
| angptl3     | 114421  | angiopoietin-like 3                                                        | 1.64E-02                     | 4.22E-03                     | 4.8      | 5.2      | 5.0     | 0.001  |
| hsf2        | 140427  | heat shock factor 2                                                        | 6.78E-03                     | 1.32E-02                     | 3.3      | 4.2      | 3.8     | 0.001  |
| prps1a      | 140620  | phosphoribosyl pyrophosphate synthetase 1A                                 | 5.25E-03                     | 2.22E-02                     | 0.8      | 2.2      | 1.5     | 0.001  |
| glra3       | 192124  | glycine receptor, alpha 3                                                  | 4.79E-03                     | 1.10E-02                     | 0.5      | 3.1      | 1.8     | 0.001  |
| glra4b      | 192125  | glycine receptor, alpha 4b                                                 | 2.16E-03                     | 2.12E-03                     | 13.8     | 15.0     | 14.4    | 0.001  |
| tagln2      | 259183  | transgelin 2                                                               | 1.43E-03                     | 1.22E-02                     | 5.0      | 5.5      | 5.3     | 0.001  |

**Table S1: Zebrafish circadian oscillating genes**

| Gene Symbol | Gene ID | Gene Description                                              | Fisher's g test p value (LD) | Fisher's g test p value (DD) | LD Phase | DD Phase | Phase * | FDR ** |
|-------------|---------|---------------------------------------------------------------|------------------------------|------------------------------|----------|----------|---------|--------|
| cyp2ad2     | 259306  | cytochrome P450, family 2, subfamily AD, polypeptide 2        | 4.49E-03                     | 1.46E-03                     | 4.2      | 5.3      | 4.8     | 0.001  |
| tram1       | 266757  | translocating chain-associating membrane protein 1            | 2.60E-02                     | 1.66E-02                     | 1.5      | 2.8      | 2.1     | 0.001  |
| sec61al2    | 266796  | Sec61 alpha like 2                                            | 5.82E-03                     | 5.29E-03                     | 21.7     | 0.3      | 23.0    | 0.001  |
| hnf1a       | 266961  | HNF1 homeobox a                                               | 1.61E-02                     | 1.32E-02                     | 4.2      | 4.7      | 4.5     | 0.001  |
| etf1        | 266989  | eukaryotic translation termination factor 1                   | 2.13E-02                     | 2.65E-02                     | 23.0     | 1.2      | 0.1     | 0.001  |
| pwp2h       | 266990  | PWP2 periodic tryptophan protein homolog (yeast)              | 4.31E-02                     | 1.44E-02                     | 0.9      | 2.7      | 1.8     | 0.001  |
| cad         | 266992  | carbamoyl-phosphate synthetase 2, aspartate transcarbamoylase | 6.02E-03                     | 6.59E-04                     | 2.1      | 4.6      | 3.3     | 0.001  |
| bckdk       | 282677  | branched chain alpha-ketoacid dehydrogenase kinase            | 5.44E-03                     | 3.01E-02                     | 13.8     | 15.3     | 14.6    | 0.001  |
| diexf       | 286787  | digestive organ expansion factor homolog                      | 8.99E-04                     | 3.52E-04                     | 0.8      | 3.7      | 2.3     | 0.001  |
| mc5ra       | 286834  | melanocortin 5a receptor                                      | 4.63E-02                     | 4.06E-02                     | 3.7      | 7.5      | 5.6     | 0.001  |
| mki67ip     | 317644  | mki67 (FHA domain) interacting nucleolar phosphoprotein       | 3.44E-02                     | 1.87E-02                     | 23.0     | 1.3      | 0.2     | 0.001  |
| zgc:63569   | 321056  | zgc:63569                                                     | 8.75E-03                     | 1.43E-04                     | 12.2     | 14.5     | 13.4    | 0.001  |
| mcmcbp      | 321119  | minichromosome maintenance complex binding protein            | 1.61E-02                     | 7.87E-03                     | 0.8      | 2.8      | 1.8     | 0.001  |
| lmb1l       | 321314  | limb region 1 like                                            | 3.12E-02                     | 1.87E-02                     | 4.3      | 5.3      | 4.8     | 0.001  |
| cd63        | 321461  | Cd63 antigen                                                  | 3.21E-04                     | 1.09E-03                     | 16.5     | 17.8     | 17.2    | 0.001  |
| zgc:109901  | 321700  | zgc:109901                                                    | 3.73E-02                     | 1.65E-02                     | 23.7     | 2.5      | 1.1     | 0.001  |
| gnl3        | 321897  | guanine nucleotide binding protein-like 3 (nucleolar)         | 2.11E-02                     | 4.55E-02                     | 22.2     | 0.2      | 23.2    | 0.001  |
| cth         | 322055  | cystathionase (cystathionine gamma-lyase)                     | 2.46E-02                     | 2.09E-02                     | 5.5      | 5.0      | 5.3     | 0.001  |
| ctps        | 322089  | CTP synthase                                                  | 1.97E-02                     | 8.45E-03                     | 22.2     | 23.8     | 23.0    | 0.001  |
| wu:fb51f10  | 322152  | wu:fb51f10                                                    | 1.24E-03                     | 2.41E-03                     | 12.2     | 14.2     | 13.2    | 0.001  |
| adkb        | 322229  | adenosine kinase b                                            | 9.21E-04                     | 8.30E-03                     | 2.5      | 4.0      | 3.3     | 0.001  |
| sult3st2    | 322415  | sulfotransferase family 3, cytosolic sulfotransferase 2       | 1.65E-02                     | 6.16E-03                     | 5.8      | 5.2      | 5.5     | 0.001  |
| cd9a        | 322455  | CD9 antigen (p24) a                                           | 4.23E-02                     | 2.66E-03                     | 15.0     | 15.8     | 15.4    | 0.001  |
| dnajc3      | 322544  | DnaJ (Hsp40) homolog, subfamily C, member 3                   | 7.27E-05                     | 5.03E-04                     | 0.0      | 1.0      | 0.5     | 0.001  |
| cx32.3      | 322617  | connexin 32.3                                                 | 2.60E-02                     | 2.51E-02                     | 23.5     | 1.0      | 0.3     | 0.001  |
| tomm40      | 322645  | translocase of outer mitochondrial membrane 40 homolog        | 4.26E-02                     | 1.93E-02                     | 0.5      | 0.8      | 0.7     | 0.001  |
| myst2       | 323181  | MYST histone acetyltransferase 2                              | 4.09E-02                     | 4.29E-02                     | 12.0     | 14.8     | 13.4    | 0.001  |
| zgc:163008  | 323951  | zgc:163008                                                    | 2.46E-02                     | 4.86E-02                     | 15.3     | 14.7     | 15.0    | 0.001  |
| wu:fc15e02  | 323961  | wu:fc15e02                                                    | 1.35E-02                     | 2.54E-02                     | 2.3      | 3.0      | 2.6     | 0.001  |
| dspsa       | 324023  | desmoplakin a                                                 | 4.12E-02                     | 4.25E-03                     | 4.2      | 5.2      | 4.7     | 0.001  |
| cd82a       | 324098  | CD82 antigen, a                                               | 2.61E-03                     | 1.98E-02                     | 14.8     | 16.2     | 15.5    | 0.001  |

**Table S1: Zebrafish circadian oscillating genes**

| Gene Symbol     | Gene ID | Gene Description                                            | Fisher's g test p value (LD) | Fisher's g test p value (DD) | LD Phase | DD Phase | Phase * | FDR ** |
|-----------------|---------|-------------------------------------------------------------|------------------------------|------------------------------|----------|----------|---------|--------|
| wu:fc20c04      | 324148  | wu:fc20c04                                                  | 1.28E-03                     | 2.63E-02                     | 15.5     | 18.2     | 16.9    | 0.001  |
| fam164a         | 324412  | family with sequence similarity 164, member A               | 1.47E-03                     | 7.94E-03                     | 13.0     | 14.3     | 13.7    | 0.001  |
| bhlhe40         | 324413  | basic helix-loop-helix family, member e40                   | 9.94E-06                     | 7.41E-03                     | 5.2      | 5.3      | 5.3     | 0.001  |
| phb2            | 324421  | prohibitin 2                                                | 3.62E-02                     | 3.94E-02                     | 1.8      | 2.8      | 2.3     | 0.001  |
| si:ch73-22c10.1 | 324543  | si:ch73-22c10.1                                             | 1.12E-02                     | 1.19E-02                     | 13.2     | 14.3     | 13.8    | 0.001  |
| nucb2b          | 326050  | nucleobindin 2b                                             | 4.05E-04                     | 9.37E-03                     | 3.7      | 4.8      | 4.3     | 0.001  |
| cnn3a           | 326931  | calponin 3, acidic a                                        | 8.46E-05                     | 3.78E-02                     | 7.2      | 5.8      | 6.5     | 0.001  |
| dnajb1b         | 327244  | DnaJ (Hsp40) homolog, subfamily B, member 1b                | 1.77E-04                     | 4.47E-02                     | 7.6      | 10.0     | 8.8     | 0.001  |
| sec22bb         | 327277  | SEC22 vesicle trafficking protein homolog B (S. cerevisiae) | 8.88E-03                     | 4.83E-02                     | 14.8     | 21.2     | 18.0    | 0.001  |
| zgc:158623      | 327345  | zgc:158623                                                  | 3.34E-03                     | 6.11E-03                     | 17.9     | 18.6     | 18.2    | 0.001  |
| zgc:63480       | 327556  | zgc:63480                                                   | 2.81E-03                     | 2.07E-02                     | 2.8      | 2.8      | 2.8     | 0.001  |
| lpcat4          | 327566  | lysophosphatidylcholine acyltransferase 4                   | 2.34E-04                     | 3.05E-03                     | 4.2      | 5.5      | 4.9     | 0.001  |
| gclm            | 333974  | glutamate-cysteine ligase, modifier subunit                 | 2.30E-02                     | 1.16E-02                     | 18.7     | 22.7     | 20.7    | 0.001  |
| naa15b          | 334099  | N(alpha)-acetyltransferase 15, NatA auxiliary subunit b     | 1.34E-02                     | 5.17E-03                     | 21.0     | 21.5     | 21.3    | 0.001  |
| alg1            | 334161  | asparagine-linked glycosylation 1 homolog (yeast, beta-1    | 4.36E-04                     | 2.98E-02                     | 13.4     | 15.4     | 14.4    | 0.001  |
| zgc:77057       | 334166  | zgc:77057                                                   | 2.41E-03                     | 4.71E-02                     | 16.0     | 17.0     | 16.5    | 0.001  |
| ldhd            | 334208  | lactate dehydrogenase D                                     | 4.43E-02                     | 4.57E-02                     | 5.5      | 5.2      | 5.4     | 0.001  |
| hnrnpa0         | 334222  | heterogeneous nuclear ribonucleoprotein A0                  | 4.49E-02                     | 1.10E-02                     | 1.0      | 2.8      | 1.9     | 0.001  |
| cuedc2          | 334351  | CUE domain containing 2                                     | 1.79E-02                     | 6.86E-03                     | 11.5     | 10.7     | 11.1    | 0.001  |
| zgc:101724      | 334483  | zgc:101724                                                  | 1.55E-03                     | 2.41E-02                     | 19.2     | 20.2     | 19.7    | 0.001  |
| prkcd           | 334571  | protein kinase C, delta                                     | 4.50E-02                     | 4.40E-02                     | 13.3     | 14.2     | 13.8    | 0.001  |
| mrpl39          | 334588  | mitochondrial ribosomal protein L39                         | 4.92E-02                     | 1.62E-02                     | 23.2     | 0.7      | 24.0    | 0.001  |
| trmt2a          | 334936  | trm2 tRNA methyltransferase 2 homolog A (S. cerevisiae)     | 2.34E-02                     | 4.24E-03                     | 0.2      | 2.5      | 1.4     | 0.001  |
| ebna1bp2        | 335049  | EBNA1 binding protein 2                                     | 1.60E-02                     | 1.03E-02                     | 15.8     | 2.4      | 21.1    | 0.001  |
| si:rp71-61h23.4 | 335278  | si:rp71-61h23.4                                             | 5.97E-03                     | 9.51E-03                     | 3.2      | 2.5      | 2.9     | 0.001  |
| wu:fl07c04      | 335281  | wu:fl07c04                                                  | 2.20E-02                     | 1.86E-02                     | 1.5      | 2.7      | 2.1     | 0.001  |
| zgc:64190       | 335628  | zgc:64190                                                   | 6.86E-03                     | 4.55E-03                     | 16.8     | 17.0     | 16.9    | 0.001  |
| gngt2a          | 335655  | guanine nucleotide binding protein (G protein), gamma tr    | 3.27E-02                     | 2.34E-03                     | 12.9     | 13.7     | 13.3    | 0.001  |
| gngt1           | 335656  | guanine nucleotide binding protein (G protein), gamma tr    | 5.66E-03                     | 4.73E-03                     | 12.0     | 12.0     | 12.0    | 0.001  |
| nme2a           | 335716  | non-metastatic cells 2a, protein (NM23B) expressed in       | 8.50E-03                     | 2.46E-02                     | 2.5      | 2.3      | 2.4     | 0.001  |
| cox7a2l         | 335751  | cytochrome c oxidase subunit VIIa polypeptide 2 like        | 1.09E-02                     | 4.22E-02                     | 21.8     | 21.3     | 21.6    | 0.001  |

**Table S1: Zebrafish circadian oscillating genes**

| Gene Symbol       | Gene ID | Gene Description                                             | Fisher's g test p value (LD) | Fisher's g test p value (DD) | LD Phase | DD Phase | Phase * | FDR ** |
|-------------------|---------|--------------------------------------------------------------|------------------------------|------------------------------|----------|----------|---------|--------|
| gas6              | 335830  | growth arrest-specific 6                                     | 3.48E-02                     | 3.93E-02                     | 15.5     | 18.5     | 17.0    | 0.001  |
| wu:fj44c04        | 336034  | wu:fj44c04                                                   | 5.27E-05                     | 3.54E-02                     | 0.7      | 3.7      | 2.2     | 0.001  |
| wu:fb10g03        | 336442  | wu:fb10g03                                                   | 1.72E-02                     | 4.74E-02                     | 1.0      | 2.5      | 1.8     | 0.001  |
| ptgds             | 336492  | prostaglandin D2 synthase                                    | 1.03E-03                     | 4.46E-02                     | 7.8      | 6.8      | 7.3     | 0.001  |
| ifi30             | 336503  | interferon gamma inducible protein 30                        | 2.60E-02                     | 4.53E-02                     | 15.7     | 17.2     | 16.5    | 0.001  |
| grn2              | 336575  | granulin 2                                                   | 1.01E-02                     | 7.39E-03                     | 18.5     | 18.7     | 18.6    | 0.001  |
| samsn1a           | 336695  | SAM domain, SH3 domain and nuclear localisation signa        | 6.51E-03                     | 2.61E-02                     | 9.6      | 11.8     | 10.7    | 0.001  |
| dnajc21           | 336984  | DnaJ (Hsp40) homolog, subfamily C, member 21                 | 5.75E-03                     | 1.65E-02                     | 20.8     | 22.3     | 21.5    | 0.001  |
| setd3             | 337193  | SET domain containing 3                                      | 6.80E-04                     | 2.21E-02                     | 2.7      | 3.8      | 3.3     | 0.001  |
| tbcb              | 337350  | tubulin folding cofactor B                                   | 1.10E-02                     | 2.80E-02                     | 5.3      | 6.0      | 5.7     | 0.001  |
| rrs1              | 337399  | RRS1 ribosome biogenesis regulator homolog (S. cerevi        | 1.61E-02                     | 1.70E-02                     | 22.5     | 0.6      | 23.5    | 0.001  |
| nfatc2ip          | 337574  | nuclear factor of activated T-cells, cytoplasmic, calcineur  | 2.14E-03                     | 3.73E-04                     | 10.3     | 13.3     | 11.8    | 0.001  |
| wu:fj84d10        | 337575  | wu:fj84d10                                                   | 1.84E-02                     | 1.66E-02                     | 22.7     | 1.5      | 0.1     | 0.001  |
| dact2             | 337795  | dapper homolog 2, antagonist of beta-catenin (xenopus)       | 1.64E-02                     | 3.81E-02                     | 3.3      | 5.5      | 4.4     | 0.001  |
| zgc:55259         | 338155  | zgc:55259                                                    | 2.84E-02                     | 3.80E-03                     | 0.5      | 2.0      | 1.3     | 0.001  |
| ppdpfa            | 338304  | pancreatic progenitor cell differentiation and proliferation | 8.85E-04                     | 1.89E-03                     | 17.4     | 18.0     | 17.7    | 0.001  |
| selt2             | 352917  | selenoprotein T, 2                                           | 1.01E-02                     | 4.01E-02                     | 16.3     | 18.8     | 17.5    | 0.001  |
| clock3            | 352927  | clock homolog 3 (mouse)                                      | 1.33E-02                     | 1.59E-02                     | 14.8     | 15.3     | 15.1    | 0.001  |
| arntl1b           | 352935  | aryl hydrocarbon receptor nuclear translocator-like 1b       | 2.42E-03                     | 1.39E-03                     | 11.9     | 13.8     | 12.8    | 0.001  |
| ier5              | 359827  | immediate early response 5                                   | 5.73E-03                     | 3.30E-02                     | 10.5     | 13.3     | 11.9    | 0.001  |
| slc34a2b          | 359838  | solute carrier family 34 (sodium phosphate), member 2b       | 2.20E-02                     | 2.32E-02                     | 11.7     | 13.2     | 12.5    | 0.001  |
| nfe2l2            | 360149  | nuclear factor (erythroid-derived 2)-like 2                  | 1.37E-02                     | 2.35E-02                     | 6.7      | 7.5      | 7.1     | 0.001  |
| ypel3             | 368214  | yippee-like 3                                                | 6.35E-03                     | 9.64E-03                     | 12.3     | 14.8     | 13.6    | 0.001  |
| sult1st3          | 368270  | sulfotransferase family 1, cytosolic sulfotransferase 3      | 3.52E-03                     | 6.55E-04                     | 5.0      | 5.4      | 5.2     | 0.001  |
| ldlrp1a           | 368278  | low density lipoprotein receptor adaptor protein 1a          | 6.10E-06                     | 6.42E-04                     | 14.5     | 16.3     | 15.4    | 0.001  |
| abcc4             | 368620  | ATP-binding cassette, sub-family C (CFTR/MRP), memb          | 4.01E-03                     | 4.01E-02                     | 1.8      | 2.1      | 2.0     | 0.001  |
| ptf1a             | 368662  | pancreas specific transcription factor, 1a                   | 3.96E-02                     | 1.90E-02                     | 18.3     | 20.8     | 19.6    | 0.001  |
| scel              | 368684  | sciellin                                                     | 1.25E-02                     | 2.20E-02                     | 1.7      | 5.2      | 3.5     | 0.001  |
| si:busm1-163l24.3 | 368753  | si:busm1-163l24.3                                            | 4.15E-02                     | 4.23E-02                     | 13.8     | 16.7     | 15.3    | 0.001  |
| guca1c            | 373099  | guanylate cyclase activator 1C                               | 7.77E-03                     | 1.46E-02                     | 3.6      | 1.5      | 2.6     | 0.001  |
| grk7b             | 373871  | G protein-coupled receptor kinase 7b                         | 3.79E-02                     | 3.80E-02                     | 1.3      | 2.1      | 1.7     | 0.001  |

**Table S1: Zebrafish circadian oscillating genes**

| Gene Symbol | Gene ID | Gene Description                                                 | Fisher's g test p value (LD) | Fisher's g test p value (DD) | LD Phase | DD Phase | Phase * | FDR ** |
|-------------|---------|------------------------------------------------------------------|------------------------------|------------------------------|----------|----------|---------|--------|
| dhcr7       | 378446  | 7-dehydrocholesterol reductase                                   | 1.55E-02                     | 1.64E-03                     | 5.8      | 6.9      | 6.3     | 0.001  |
| fbxl3a      | 378451  | F-box and leucine-rich repeat protein 3A                         | 1.19E-03                     | 1.14E-02                     | 13.0     | 15.0     | 14.0    | 0.001  |
| mtr         | 378847  | 5-methyltetrahydrofolate-homocysteine methyltransferase          | 2.03E-02                     | 2.57E-02                     | 2.2      | 3.3      | 2.8     | 0.001  |
| pdca        | 386613  | phosducin a                                                      | 2.73E-05                     | 1.83E-02                     | 3.9      | 5.1      | 4.5     | 0.001  |
| tob1a       | 386629  | transducer of ERBB2, 1a                                          | 2.58E-03                     | 4.12E-02                     | 2.3      | 3.0      | 2.7     | 0.001  |
| slc13a1     | 387592  | solute carrier family 13 (sodium/sulphate symporters), member 1  | 1.39E-03                     | 1.40E-02                     | 4.7      | 4.0      | 4.4     | 0.001  |
| hsd17b4     | 393105  | hydroxysteroid (17-beta) dehydrogenase 4                         | 2.77E-03                     | 3.31E-03                     | 6.5      | 7.0      | 6.8     | 0.001  |
| rasl11b     | 393109  | RAS-like, family 11, member B                                    | 1.23E-02                     | 1.57E-02                     | 4.0      | 3.0      | 3.5     | 0.001  |
| slmapb      | 393146  | sarcolemma associated protein b                                  | 1.51E-03                     | 3.20E-02                     | 4.2      | 3.7      | 4.0     | 0.001  |
| zgc:56005   | 393155  | zgc:56005                                                        | 2.01E-03                     | 5.19E-03                     | 5.7      | 9.2      | 7.5     | 0.001  |
| polr3c      | 393201  | polymerase (RNA) III (DNA directed) polypeptide C                | 1.48E-02                     | 4.71E-03                     | 22.8     | 1.5      | 0.2     | 0.001  |
| vil1l       | 393207  | villin 1 like                                                    | 3.81E-02                     | 4.09E-02                     | 3.2      | 4.8      | 4.0     | 0.001  |
| rnaseh2b    | 393241  | ribonuclease H2, subunit B                                       | 3.76E-02                     | 2.98E-02                     | 4.0      | 4.8      | 4.4     | 0.001  |
| zgc:56407   | 393257  | zgc:56407                                                        | 1.72E-02                     | 3.14E-02                     | 23.3     | 0.7      | 0.0     | 0.001  |
| psmd6       | 393261  | proteasome (prosome, macropain) 26S subunit, non-ATF             | 2.33E-02                     | 4.82E-02                     | 18.2     | 19.7     | 19.0    | 0.001  |
| zgc:56066   | 393282  | zgc:56066                                                        | 1.84E-02                     | 3.74E-02                     | 0.4      | 2.3      | 1.3     | 0.001  |
| slc10a2     | 393329  | solute carrier family 10 (sodium/bile acid cotransporter family) | 3.99E-03                     | 4.43E-02                     | 22.3     | 0.2      | 23.3    | 0.001  |
| zgc:65987   | 393539  | zgc:65987                                                        | 7.60E-03                     | 1.78E-02                     | 16.9     | 17.9     | 17.4    | 0.001  |
| cyp2p9      | 393592  | cytochrome P450, family 2, subfamily P, polypeptide 9            | 3.70E-03                     | 3.52E-02                     | 4.0      | 5.5      | 4.8     | 0.001  |
| acsl4a      | 393622  | acyl-CoA synthetase long-chain family member 4a                  | 9.55E-06                     | 2.54E-03                     | 2.3      | 4.0      | 3.2     | 0.001  |
| arl3l1      | 393666  | ADP-ribosylation factor-like 3, like 1                           | 5.90E-03                     | 4.31E-02                     | 6.5      | 20.8     | 1.7     | 0.001  |
| guk1        | 393697  | guanylate kinase 1                                               | 1.19E-02                     | 5.07E-03                     | 18.5     | 19.3     | 18.9    | 0.001  |
| gabra6a     | 393704  | gamma-aminobutyric acid (GABA) A receptor, alpha 6a              | 1.23E-03                     | 3.25E-02                     | 1.3      | 23.5     | 0.4     | 0.001  |
| smfn        | 393717  | small fragment nuclease                                          | 1.88E-02                     | 4.69E-02                     | 0.2      | 2.3      | 1.3     | 0.001  |
| rpe65a      | 393724  | retinal pigment epithelium-specific protein 65a                  | 1.73E-03                     | 4.56E-03                     | 23.5     | 1.0      | 0.3     | 0.001  |
| kcnip3      | 393755  | Kv channel interacting protein 3, calsenilin                     | 3.26E-04                     | 7.42E-03                     | 2.8      | 3.3      | 3.1     | 0.001  |
| rdh8l       | 393761  | retinol dehydrogenase 8 like                                     | 3.53E-03                     | 3.92E-02                     | 21.8     | 7.5      | 2.7     | 0.001  |
| prdx6       | 393778  | peroxiredoxin 6                                                  | 2.50E-04                     | 4.45E-02                     | 5.5      | 5.8      | 5.7     | 0.001  |
| ppp1r3cb    | 393807  | protein phosphatase 1, regulatory (inhibitor) subunit 3Cb        | 1.17E-02                     | 3.96E-02                     | 9.3      | 11.8     | 10.6    | 0.001  |
| znrf1       | 393844  | zinc and ring finger 1                                           | 3.08E-02                     | 8.03E-03                     | 14.5     | 14.5     | 14.5    | 0.001  |
| zgc:56064   | 393885  | zgc:56064                                                        | 4.67E-03                     | 1.10E-02                     | 18.0     | 19.0     | 18.5    | 0.001  |

**Table S1: Zebrafish circadian oscillating genes**

| Gene Symbol     | Gene ID | Gene Description                                       | Fisher's g test p value (LD) | Fisher's g test p value (DD) | LD Phase | DD Phase | Phase * | FDR ** |
|-----------------|---------|--------------------------------------------------------|------------------------------|------------------------------|----------|----------|---------|--------|
| abhd2a          | 393888  | abhydrolase domain containing 2a                       | 5.50E-03                     | 1.50E-02                     | 3.7      | 3.8      | 3.8     | 0.001  |
| ttc4            | 393981  | tetratricopeptide repeat domain 4                      | 1.02E-02                     | 4.58E-02                     | 23.3     | 0.8      | 0.1     | 0.001  |
| aacs            | 393984  | acetoacetyl-CoA synthetase                             | 6.87E-03                     | 3.24E-02                     | 1.3      | 21.8     | 23.6    | 0.001  |
| lipc            | 393997  | lipase, hepatic                                        | 4.59E-05                     | 5.12E-03                     | 7.0      | 7.3      | 7.2     | 0.001  |
| mxld3           | 394031  | MAX dimerization protein 3                             | 2.14E-04                     | 6.48E-04                     | 11.8     | 13.5     | 12.7    | 0.001  |
| ftcd            | 394052  | formiminotransferase cyclodeaminase                    | 8.67E-04                     | 2.32E-03                     | 10.8     | 11.2     | 11.0    | 0.001  |
| fus             | 394058  | fusion (involved in t(12;16) in malignant liposarcoma) | 2.47E-03                     | 1.76E-03                     | 15.0     | 15.2     | 15.1    | 0.001  |
| sh3gl2          | 394091  | SH3-domain GRB2-like 2                                 | 4.87E-04                     | 3.82E-02                     | 2.0      | 2.5      | 2.3     | 0.001  |
| aldh4a1         | 394133  | aldehyde dehydrogenase 4 family, member A1             | 1.11E-02                     | 1.34E-03                     | 5.0      | 5.0      | 5.0     | 0.001  |
| dusp4           | 394146  | dual specificity phosphatase 4                         | 1.01E-03                     | 5.00E-02                     | 6.5      | 0.5      | 3.5     | 0.001  |
| sb:cb1058       | 394209  | sb:cb1058                                              | 4.15E-02                     | 2.27E-02                     | 1.7      | 1.7      | 1.7     | 0.001  |
| rrp9            | 402808  | ribosomal RNA processing 9, small subunit (SSU) proces | 2.18E-02                     | 4.19E-02                     | 23.5     | 1.8      | 0.7     | 0.001  |
| gcat            | 402822  | glycine C-acetyltransferase                            | 6.29E-05                     | 7.54E-03                     | 5.3      | 5.5      | 5.4     | 0.001  |
| si:dkey-4e7.3   | 402865  | si:dkey-4e7.3                                          | 2.03E-03                     | 3.87E-02                     | 2.7      | 3.7      | 3.2     | 0.001  |
| mpp6a           | 402878  | membrane protein, palmitoylated 6a (MAGUK p55 subfa    | 2.69E-03                     | 1.54E-02                     | 23.7     | 0.3      | 0.0     | 0.001  |
| mmgt1           | 402891  | membrane magnesium transporter 1                       | 1.55E-02                     | 3.44E-02                     | 19.9     | 21.7     | 20.8    | 0.001  |
| rgl1            | 402933  | ral guanine nucleotide dissociation stimulator-like 1  | 1.95E-03                     | 1.90E-03                     | 12.7     | 12.8     | 12.8    | 0.001  |
| pnp4b           | 402940  | purine nucleoside phosphorylase 4b                     | 5.62E-03                     | 9.59E-03                     | 6.0      | 6.3      | 6.1     | 0.001  |
| zgc:77906       | 402945  | zgc:77906                                              | 3.30E-03                     | 1.64E-03                     | 4.5      | 4.7      | 4.6     | 0.001  |
| si:dkey-194e6.1 | 402976  | si:dkey-194e6.1                                        | 4.51E-02                     | 3.24E-02                     | 11.4     | 4.1      | 7.8     | 0.001  |
| zgc:77838       | 402980  | zgc:77838                                              | 2.58E-02                     | 3.16E-02                     | 16.7     | 17.5     | 17.1    | 0.001  |
| hnrnp1          | 402984  | heterogeneous nuclear ribonucleoprotein H1             | 5.12E-03                     | 7.33E-03                     | 14.0     | 14.0     | 14.0    | 0.001  |
| atad3b          | 403004  | ATPase family, AAA domain containing 3B                | 1.80E-02                     | 7.40E-03                     | 23.0     | 1.0      | 0.0     | 0.001  |
| dock8           | 403040  | dedicator of cytokinesis 8                             | 2.40E-04                     | 2.99E-02                     | 12.3     | 14.7     | 13.5    | 0.001  |
| rgn             | 403070  | regucalcin                                             | 3.58E-02                     | 6.90E-03                     | 7.0      | 6.5      | 6.8     | 0.001  |
| gnmt            | 403338  | glycine N-methyltransferase                            | 2.79E-02                     | 3.98E-02                     | 9.5      | 7.8      | 8.7     | 0.001  |
| traf4b          | 404035  | tnf receptor-associated factor 4b                      | 2.69E-03                     | 2.92E-02                     | 15.5     | 16.8     | 16.2    | 0.001  |
| cx52.9          | 404625  | connexin 52.9                                          | 3.55E-02                     | 4.33E-02                     | 18.2     | 19.3     | 18.8    | 0.001  |
| mao             | 404730  | monoamine oxidase                                      | 4.42E-02                     | 3.86E-02                     | 4.0      | 5.0      | 4.5     | 0.001  |
| blnk            | 405764  | B-cell linker                                          | 4.59E-02                     | 1.95E-02                     | 17.8     | 18.8     | 18.3    | 0.001  |
| zgc:73371       | 405817  | zgc:73371                                              | 1.32E-04                     | 4.45E-02                     | 4.2      | 3.7      | 4.0     | 0.001  |

**Table S1: Zebrafish circadian oscillating genes**

| Gene Symbol | Gene ID | Gene Description                                       | Fisher's g test p value (LD) | Fisher's g test p value (DD) | LD Phase | DD Phase | Phase * | FDR ** |
|-------------|---------|--------------------------------------------------------|------------------------------|------------------------------|----------|----------|---------|--------|
| clic5       | 405833  | chloride intracellular channel 5                       | 1.12E-02                     | 1.63E-03                     | 5.5      | 6.8      | 6.2     | 0.001  |
| spast       | 405851  | spastin                                                | 1.99E-02                     | 2.94E-02                     | 14.2     | 15.7     | 15.0    | 0.001  |
| per1b       | 406204  | period homolog 1b (Drosophila)                         | 3.91E-04                     | 1.56E-03                     | 2.3      | 4.5      | 3.4     | 0.001  |
| sema6d      | 406272  | sema domain, transmembrane domain (TM), and cytopla    | 1.45E-02                     | 2.67E-02                     | 13.6     | 13.4     | 13.5    | 0.001  |
| itpk1       | 406290  | inositol 1,3,4-triphosphate 5/6 kinase                 | 2.63E-03                     | 2.98E-02                     | 5.0      | 4.8      | 4.9     | 0.001  |
| chia.2      | 406338  | chitinase, acidic.2                                    | 6.59E-03                     | 7.43E-03                     | 7.8      | 6.5      | 7.2     | 0.001  |
| hk2         | 406339  | hexokinase 2                                           | 4.35E-02                     | 1.11E-02                     | 21.2     | 23.0     | 22.1    | 0.001  |
| znf259      | 406382  | zinc finger protein 259                                | 3.18E-03                     | 1.31E-02                     | 0.5      | 1.5      | 1.0     | 0.001  |
| sort1a      | 406511  | sortilin 1a                                            | 2.02E-02                     | 3.19E-02                     | 14.2     | 15.4     | 14.8    | 0.001  |
| csnk1db     | 406533  | casein kinase 1, delta b                               | 4.68E-04                     | 2.07E-03                     | 2.0      | 2.7      | 2.4     | 0.001  |
| decr2       | 406623  | 2,4-dienoyl CoA reductase 2, peroxisomal               | 1.74E-02                     | 2.93E-02                     | 4.8      | 4.3      | 4.6     | 0.001  |
| lgmn        | 406625  | legumain                                               | 1.82E-04                     | 9.84E-03                     | 15.5     | 17.8     | 16.7    | 0.001  |
| grtp1a      | 406711  | growth hormone regulated TBC protein 1a                | 1.19E-02                     | 2.36E-02                     | 23.7     | 0.2      | 24.0    | 0.001  |
| EIF3JB      | 406823  | eukaryotic translation initiation factor 3, subunit Jb | 4.77E-03                     | 5.59E-03                     | 22.3     | 23.8     | 23.1    | 0.001  |
| sesn3       | 406840  | sestrin 3                                              | 1.19E-03                     | 2.97E-03                     | 11.8     | 14.0     | 12.9    | 0.001  |
| MRPS31      | 407642  | mitochondrial ribosomal protein S31                    | 1.75E-02                     | 9.14E-04                     | 0.2      | 1.2      | 0.7     | 0.001  |
| prlra       | 407651  | prolactin receptor a                                   | 3.26E-03                     | 2.80E-02                     | 1.0      | 2.2      | 1.6     | 0.001  |
| wu:fd55e03  | 407663  | wu:fd55e03                                             | 1.53E-03                     | 1.07E-03                     | 3.8      | 4.5      | 4.2     | 0.001  |
| rpia        | 407673  | ribose 5-phosphate isomerase A (ribose 5-phosphate ep  | 9.09E-03                     | 2.42E-02                     | 2.9      | 3.3      | 3.1     | 0.001  |
| lrrfp1a     | 407677  | leucine rich repeat (in FLII) interacting protein 1a   | 1.28E-03                     | 3.92E-02                     | 4.8      | 3.5      | 4.1     | 0.001  |
| AKR1B1      | 415138  | aldo-keto reductase family 1, member B1 (aldose reduct | 7.83E-04                     | 1.56E-04                     | 5.3      | 4.9      | 5.1     | 0.001  |
| msrb3       | 415184  | methionine sulfoxide reductase B3                      | 5.25E-04                     | 4.26E-04                     | 7.2      | 6.6      | 6.9     | 0.001  |
| cdkrap3     | 415195  | CDK5 regulatory subunit associated protein 3           | 2.14E-02                     | 1.33E-04                     | 23.5     | 1.0      | 0.3     | 0.001  |
| rpp40l      | 415238  | ribonuclease P 40 subunit like                         | 1.53E-02                     | 8.45E-03                     | 0.7      | 2.3      | 1.5     | 0.001  |
| rpf1        | 415250  | ribosome production factor 1 homolog (S. cerevisiae)   | 4.53E-02                     | 3.39E-02                     | 23.2     | 0.3      | 23.8    | 0.001  |
| mrrf        | 431721  | mitochondrial ribosome recycling factor                | 8.98E-04                     | 1.88E-02                     | 1.3      | 0.4      | 0.8     | 0.001  |
| zgc:92432   | 431722  | zgc:92432                                              | 1.06E-02                     | 4.02E-03                     | 20.3     | 21.2     | 20.8    | 0.001  |
| tfcp2l1     | 431761  | transcription factor CP2-like 1                        | 8.48E-03                     | 5.56E-03                     | 14.0     | 15.3     | 14.7    | 0.001  |
| nus1        | 436629  | nuclear undecaprenyl pyrophosphate synthase 1 homolo   | 4.70E-02                     | 3.25E-02                     | 0.7      | 1.5      | 1.1     | 0.001  |
| trim55a     | 436631  | tripartite motif-containing 55a                        | 1.29E-03                     | 2.50E-03                     | 15.2     | 17.0     | 16.1    | 0.001  |
| zgc:92090   | 436640  | zgc:92090                                              | 2.40E-02                     | 4.61E-02                     | 11.2     | 13.6     | 12.4    | 0.001  |

**Table S1: Zebrafish circadian oscillating genes**

| Gene Symbol | Gene ID | Gene Description                                               | Fisher's g test p value (LD) | Fisher's g test p value (DD) | LD Phase | DD Phase | Phase * | FDR ** |
|-------------|---------|----------------------------------------------------------------|------------------------------|------------------------------|----------|----------|---------|--------|
| zgc:92035   | 436665  | zgc:92035                                                      | 1.17E-02                     | 1.43E-02                     | 3.8      | 6.0      | 4.9     | 0.001  |
| zgc:92712   | 436668  | zgc:92712                                                      | 8.91E-03                     | 1.13E-02                     | 2.2      | 2.7      | 2.5     | 0.001  |
| arr3a       | 436678  | arrestin 3a, retinal (X-arrestin)                              | 4.16E-02                     | 3.03E-03                     | 4.7      | 2.8      | 3.7     | 0.001  |
| zgc:92658   | 436699  | zgc:92658                                                      | 1.70E-02                     | 6.62E-03                     | 20.9     | 22.9     | 21.9    | 0.001  |
| cldn15lb    | 436719  | claudin 15-like b                                              | 2.01E-02                     | 1.64E-02                     | 15.4     | 16.5     | 15.9    | 0.001  |
| zgc:92739   | 436849  | zgc:92739                                                      | 4.95E-02                     | 2.41E-03                     | 0.4      | 2.6      | 1.5     | 0.001  |
| gcs hb      | 436852  | glycine cleavage system protein H (aminomethyl carrier)        | 8.32E-03                     | 1.13E-02                     | 22.5     | 1.0      | 23.8    | 0.001  |
| sult1st6    | 436872  | sulfotransferase family 1, cytosolic sulfotransferase 6        | 1.18E-02                     | 8.83E-03                     | 3.8      | 4.5      | 4.2     | 0.001  |
| rgp1        | 436881  | RGP1 retrograde golgi transport homolog (S. cerevisiae)        | 1.55E-03                     | 8.09E-03                     | 14.7     | 16.7     | 15.7    | 0.001  |
| nrbf2       | 436886  | nuclear receptor binding factor 2                              | 1.02E-02                     | 1.79E-03                     | 13.7     | 15.0     | 14.4    | 0.001  |
| zgc:92254   | 436894  | zgc:92254                                                      | 2.10E-03                     | 1.33E-04                     | 7.5      | 7.0      | 7.3     | 0.001  |
| slc17a9b    | 436908  | solute carrier family 17, member 9b                            | 4.92E-03                     | 3.80E-03                     | 22.3     | 1.3      | 23.8    | 0.001  |
| camk2n2     | 436915  | calcium/calmodulin-dependent protein kinase II inhibitor       | 7.86E-03                     | 1.28E-02                     | 17.7     | 18.5     | 18.1    | 0.001  |
| slc1a1      | 436939  | solute carrier family 1 (neuronal/epithelial high affinity glu | 6.15E-04                     | 6.65E-03                     | 16.2     | 16.3     | 16.3    | 0.001  |
| zgc:91931   | 436945  | zgc:91931                                                      | 7.63E-04                     | 5.26E-04                     | 13.2     | 15.2     | 14.2    | 0.001  |
| cdc34b      | 436961  | cell division cycle 34 homolog (S. cerevisiae) b               | 1.15E-03                     | 4.58E-03                     | 12.8     | 14.7     | 13.7    | 0.001  |
| zgc:92630   | 436969  | zgc:92630                                                      | 1.09E-04                     | 8.88E-03                     | 5.8      | 4.7      | 5.3     | 0.001  |
| pde6d       | 436981  | phosphodiesterase 6D, cGMP-specific, rod, delta                | 1.00E-02                     | 1.26E-02                     | 1.7      | 2.2      | 2.0     | 0.001  |
| zgc:100980  | 437012  | zgc:100980                                                     | 5.08E-03                     | 4.38E-02                     | 1.8      | 3.0      | 2.4     | 0.001  |
| rab3aa      | 445024  | RAB3A, member RAS oncogene family, a                           | 7.24E-04                     | 2.17E-03                     | 20.4     | 20.0     | 20.2    | 0.001  |
| hars2       | 445046  | histidyl-tRNA synthetase 2, mitochondrial (putative)           | 5.24E-03                     | 3.01E-02                     | 1.2      | 3.2      | 2.2     | 0.001  |
| spsb4b      | 445080  | splA/ryanodine receptor domain and SOCS box containir          | 6.56E-05                     | 6.86E-03                     | 12.0     | 13.3     | 12.7    | 0.001  |
| zgc:92006   | 445101  | zgc:92006                                                      | 3.18E-02                     | 2.29E-02                     | 21.7     | 22.8     | 22.3    | 0.001  |
| cdk5r2b     | 445114  | cyclin-dependent kinase 5, regulatory subunit 2                | 2.66E-04                     | 3.88E-03                     | 3.2      | 1.5      | 2.4     | 0.001  |
| zgc:101071  | 445175  | zgc:101071                                                     | 3.03E-02                     | 3.51E-02                     | 23.2     | 2.2      | 0.7     | 0.001  |
| mnd1        | 445203  | meiotic nuclear divisions 1 homolog (S. cerevisiae)            | 3.23E-05                     | 2.62E-02                     | 9.8      | 9.5      | 9.7     | 0.001  |
| mphosph6    | 445224  | M-phase phosphoprotein 6                                       | 8.77E-03                     | 1.53E-02                     | 22.8     | 0.7      | 23.8    | 0.001  |
| harbi1      | 445279  | harbinger transposase derived 1                                | 2.94E-02                     | 9.96E-03                     | 10.7     | 11.8     | 11.3    | 0.001  |
| tmem144a    | 445495  | transmembrane protein 144a                                     | 2.08E-02                     | 5.69E-03                     | 15.2     | 17.0     | 16.1    | 0.001  |
| zgc:92445   | 447802  | zgc:92445                                                      | 2.68E-02                     | 2.43E-02                     | 3.2      | 0.8      | 2.0     | 0.001  |
| rassf1      | 447811  | Ras association (RalGDS/AF-6) domain family 1                  | 4.64E-02                     | 1.85E-02                     | 13.0     | 14.8     | 13.9    | 0.001  |



**Table S1: Zebrafish circadian oscillating genes**

| Gene Symbol       | Gene ID | Gene Description                                            | Fisher's g test p value (LD) | Fisher's g test p value (DD) | LD Phase | DD Phase | Phase * | FDR ** |
|-------------------|---------|-------------------------------------------------------------|------------------------------|------------------------------|----------|----------|---------|--------|
| zgc:92161         | 447817  | zgc:92161                                                   | 3.33E-04                     | 8.34E-03                     | 8.2      | 8.8      | 8.5     | 0.001  |
| fth1b             | 447823  | ferritin, heavy polypeptide 1b                              | 3.17E-04                     | 1.26E-02                     | 14.8     | 15.0     | 14.9    | 0.001  |
| eif4e3            | 447850  | eukaryotic translation initiation factor 4E family member 3 | 3.21E-04                     | 2.00E-03                     | 13.0     | 15.0     | 14.0    | 0.001  |
| dirc2             | 447858  | disrupted in renal carcinoma 2                              | 2.20E-02                     | 1.21E-02                     | 14.7     | 15.7     | 15.2    | 0.001  |
| acsl5             | 447860  | acyl-CoA synthetase long-chain family member 5              | 7.57E-04                     | 1.61E-02                     | 4.2      | 6.0      | 5.1     | 0.001  |
| zgc:92470         | 447867  | zgc:92470                                                   | 1.95E-02                     | 2.19E-02                     | 4.0      | 3.7      | 3.9     | 0.001  |
| smyd5             | 447875  | SMYD family member 5                                        | 3.06E-02                     | 2.01E-02                     | 21.8     | 23.2     | 22.5    | 0.001  |
| itgb1bp3          | 447879  | integrin beta 1 binding protein 3                           | 5.45E-03                     | 1.11E-02                     | 1.0      | 2.4      | 1.7     | 0.001  |
| zgc:101748        | 447888  | zgc:101748                                                  | 2.93E-02                     | 4.85E-02                     | 23.8     | 12.0     | 17.9    | 0.001  |
| si:ch211-217g15.2 | 447896  | si:ch211-217g15.2                                           | 3.48E-02                     | 9.72E-04                     | 23.3     | 2.5      | 0.9     | 0.001  |
| cox17             | 447914  | COX17 cytochrome c oxidase assembly homolog (S. cer         | 3.02E-03                     | 2.71E-03                     | 5.2      | 2.8      | 4.0     | 0.001  |
| zgc:103748        | 447917  | zgc:103748                                                  | 5.22E-05                     | 2.64E-02                     | 23.3     | 0.2      | 23.8    | 0.001  |
| zgc:103625        | 447931  | zgc:103625                                                  | 1.72E-02                     | 1.44E-02                     | 19.3     | 18.7     | 19.0    | 0.001  |
| crata             | 449545  | carnitine O-acetyltransferase a                             | 3.59E-03                     | 1.15E-02                     | 11.3     | 14.0     | 12.7    | 0.001  |
| stk25a            | 449653  | serine/threonine kinase 25a                                 | 1.81E-02                     | 1.83E-02                     | 15.7     | 16.7     | 16.2    | 0.001  |
| acn9              | 449654  | ACN9 homolog (S. cerevisiae)                                | 6.74E-03                     | 9.55E-03                     | 2.8      | 1.8      | 2.3     | 0.001  |
| osbpl7            | 449656  | oxysterol binding protein-like 7                            | 6.39E-03                     | 3.91E-02                     | 3.3      | 1.2      | 2.2     | 0.001  |
| mylk4             | 449707  | myosin light chain kinase family, member 4                  | 6.46E-03                     | 3.93E-02                     | 21.8     | 23.5     | 22.7    | 0.001  |
| mgst1             | 449784  | microsomal glutathione S-transferase 1                      | 7.84E-03                     | 3.12E-02                     | 6.8      | 7.7      | 7.3     | 0.001  |
| pgm2l1            | 449945  | phosphoglucomutase 2-like 1                                 | 5.36E-04                     | 2.08E-02                     | 12.5     | 16.2     | 14.4    | 0.001  |
| exosc9            | 450057  | exosome component 9                                         | 4.64E-02                     | 1.38E-02                     | 0.7      | 3.0      | 1.9     | 0.001  |
| eif1axa           | 450062  | eukaryotic translation initiation factor 1A, X-linked, a    | 1.17E-02                     | 1.64E-03                     | 0.7      | 3.0      | 1.9     | 0.001  |
| dera              | 450077  | 2-deoxyribose-5-phosphate aldolase homolog (C. elegans)     | 7.62E-03                     | 4.06E-03                     | 5.7      | 5.0      | 5.4     | 0.001  |
| cx28.9            | 492358  | connexin 28.9                                               | 1.43E-02                     | 3.73E-02                     | 11.4     | 1.5      | 6.4     | 0.001  |
| zgc:103488        | 492473  | zgc:103488                                                  | 2.37E-02                     | 2.51E-03                     | 14.9     | 17.1     | 16.0    | 0.001  |
| cyp2n13           | 492484  | cytochrome P450, family 2, subfamily N, polypeptide 13      | 8.74E-05                     | 9.04E-04                     | 5.0      | 6.2      | 5.6     | 0.001  |
| zgc:101897        | 492500  | zgc:101897                                                  | 2.65E-02                     | 4.37E-02                     | 6.0      | 6.6      | 6.3     | 0.001  |
| dph5              | 492514  | DPH5 homolog (S. cerevisiae)                                | 2.00E-02                     | 3.88E-02                     | 22.9     | 0.9      | 23.9    | 0.001  |
| im:7145112        | 492652  | im:7145112                                                  | 3.76E-02                     | 2.55E-02                     | 22.8     | 1.0      | 23.9    | 0.001  |
| cyp3c1l2          | 492759  | cytochrome P450, family 3, subfamily c, polypeptide 1 like  | 2.43E-02                     | 3.79E-02                     | 1.1      | 2.4      | 1.7     | 0.001  |
| svopl             | 492766  | SVOP-like                                                   | 1.51E-04                     | 4.08E-02                     | 13.5     | 15.7     | 14.6    | 0.001  |

**Table S1: Zebrafish circadian oscillating genes**

| Gene Symbol      | Gene ID | Gene Description                                         | Fisher's g test p value (LD) | Fisher's g test p value (DD) | LD Phase | DD Phase | Phase * | FDR ** |
|------------------|---------|----------------------------------------------------------|------------------------------|------------------------------|----------|----------|---------|--------|
| zgc:101722       | 494087  | zgc:101722                                               | 1.65E-03                     | 9.23E-03                     | 11.3     | 13.0     | 12.1    | 0.001  |
| nr1d1            | 494487  | nuclear receptor subfamily 1, group d, member 1          | 5.74E-03                     | 2.21E-02                     | 22.8     | 0.8      | 23.8    | 0.001  |
| zgc:92218        | 494495  | zgc:92218                                                | 4.46E-05                     | 4.40E-02                     | 14.0     | 18.5     | 16.3    | 0.001  |
| pcdh1gb2         | 503573  | protocadherin 1 gamma b 2                                | 3.74E-02                     | 3.70E-03                     | 15.5     | 15.0     | 15.3    | 0.001  |
| upp1             | 503707  | uridine phosphorylase 1                                  | 1.07E-02                     | 4.31E-02                     | 12.1     | 1.3      | 6.7     | 0.001  |
| si:ch211-221p4.4 | 503788  | si:ch211-221p4.4                                         | 9.20E-04                     | 5.68E-03                     | 3.0      | 3.8      | 3.4     | 0.001  |
| im:7150988       | 504039  | im:7150988                                               | 2.38E-02                     | 3.18E-02                     | 5.1      | 4.1      | 4.6     | 0.001  |
| im:7155152       | 504151  | im:7155152                                               | 1.34E-02                     | 1.78E-03                     | 15.3     | 15.0     | 15.2    | 0.001  |
| zgc:112185       | 541326  | zgc:112185                                               | 1.51E-03                     | 3.56E-03                     | 1.5      | 2.5      | 2.0     | 0.001  |
| tim44            | 541380  | translocase of inner mitochondrial membrane 44 homolog   | 2.25E-02                     | 3.72E-02                     | 22.1     | 0.8      | 23.5    | 0.001  |
| cdc42ep2         | 541404  | CDC42 effector protein (Rho GTPase binding) 2            | 2.38E-02                     | 1.52E-02                     | 13.2     | 19.2     | 16.2    | 0.001  |
| zgc:113006       | 541429  | zgc:113006                                               | 8.12E-04                     | 1.39E-04                     | 6.5      | 6.8      | 6.7     | 0.001  |
| cntn1b           | 541474  | contactin 1b                                             | 2.05E-02                     | 1.73E-02                     | 15.7     | 15.0     | 15.4    | 0.001  |
| glb1             | 548343  | galactosidase, beta 1                                    | 7.67E-03                     | 1.83E-03                     | 15.3     | 18.2     | 16.8    | 0.001  |
| zgc:110712       | 550250  | zgc:110712                                               | 1.02E-02                     | 2.36E-02                     | 4.3      | 5.0      | 4.7     | 0.001  |
| zgc:110283       | 550268  | zgc:110283                                               | 4.79E-03                     | 4.13E-02                     | 6.3      | 7.0      | 6.7     | 0.001  |
| syt13            | 550345  | synaptotagmin XIII                                       | 3.76E-03                     | 1.14E-03                     | 6.7      | 4.8      | 5.8     | 0.001  |
| zgc:112492       | 550351  | zgc:112492                                               | 7.73E-03                     | 2.34E-03                     | 16.7     | 17.7     | 17.2    | 0.001  |
| srd5a2a          | 550398  | steroid-5-alpha-reductase, alpha polypeptide 2a          | 6.42E-03                     | 4.08E-03                     | 2.6      | 4.0      | 3.3     | 0.001  |
| coq10b           | 550442  | coenzyme Q10 homolog B (S. cerevisiae)                   | 4.34E-02                     | 1.89E-02                     | 3.3      | 4.1      | 3.7     | 0.001  |
| mrps18b          | 550455  | mitochondrial ribosomal protein S18B                     | 7.93E-03                     | 4.70E-03                     | 22.9     | 0.3      | 23.6    | 0.001  |
| hmgb3b           | 550466  | high-mobility group box 3b                               | 1.42E-02                     | 2.38E-02                     | 2.7      | 4.7      | 3.7     | 0.001  |
| zgc:110200       | 550523  | zgc:110200                                               | 3.24E-03                     | 6.32E-04                     | 3.5      | 3.3      | 3.4     | 0.001  |
| fxc1             | 550527  | fracture callus 1 homolog (rat)                          | 2.01E-03                     | 3.11E-03                     | 0.0      | 0.7      | 0.4     | 0.001  |
| gnpda1           | 550565  | glucosamine-6-phosphate deaminase 1                      | 3.88E-03                     | 1.94E-02                     | 12.0     | 12.8     | 12.4    | 0.001  |
| itrip1           | 550570  | inositol 1,4,5-triphosphate receptor interacting protein | 3.90E-03                     | 1.08E-02                     | 1.7      | 2.3      | 2.0     | 0.001  |
| c1qtnf1          | 550573  | C1q and tumor necrosis factor related protein 1          | 3.72E-03                     | 2.92E-04                     | 6.7      | 7.0      | 6.9     | 0.001  |
| zgc:113106       | 550574  | zgc:113106                                               | 3.35E-02                     | 3.67E-02                     | 16.5     | 19.7     | 18.1    | 0.001  |
| rgra             | 550575  | retinal G protein coupled receptor a                     | 2.13E-03                     | 3.39E-03                     | 6.3      | 4.8      | 5.6     | 0.001  |
| stx6             | 550577  | syntaxin 6                                               | 4.17E-02                     | 2.23E-02                     | 13.5     | 15.0     | 14.3    | 0.001  |
| si:dkey-171o17.2 | 550606  | si:dkey-171o17.2                                         | 1.31E-02                     | 1.09E-02                     | 23.5     | 1.3      | 0.4     | 0.001  |

**Table S1: Zebrafish circadian oscillating genes**

| Gene Symbol      | Gene ID | Gene Description                                            | Fisher's g test p value (LD) | Fisher's g test p value (DD) | LD Phase | DD Phase | Phase * | FDR ** |
|------------------|---------|-------------------------------------------------------------|------------------------------|------------------------------|----------|----------|---------|--------|
| lrrc30           | 552944  | leucine rich repeat containing 30                           | 8.79E-03                     | 3.30E-03                     | 12.7     | 12.8     | 12.8    | 0.001  |
| pm20d1.1         | 553216  | peptidase M20 domain containing 1, tandem duplicate 1       | 3.92E-03                     | 1.70E-02                     | 3.7      | 3.2      | 3.5     | 0.001  |
| LOC553231        | 553231  | hypothetical protein LOC553231                              | 1.13E-02                     | 4.85E-02                     | 12.0     | 15.5     | 13.8    | 0.001  |
| lrata            | 553239  | lecithin retinol acyltransferase a (phosphatidylcholine--re | 1.16E-02                     | 4.91E-02                     | 17.3     | 17.7     | 17.5    | 0.001  |
| ca4b             | 553246  | carbonic anhydrase IV b                                     | 5.12E-03                     | 2.43E-02                     | 17.8     | 18.5     | 18.2    | 0.001  |
| si:ch211-196f5.1 | 553305  | si:ch211-196f5.1                                            | 3.10E-02                     | 4.08E-02                     | 23.5     | 1.5      | 0.5     | 0.001  |
| sec24d           | 553407  | SEC24 family, member D (S. cerevisiae)                      | 1.91E-03                     | 4.37E-02                     | 0.7      | 1.8      | 1.3     | 0.001  |
| mep1a.1          | 553530  | mepirin A, alpha.1                                          | 4.90E-04                     | 9.98E-03                     | 1.3      | 2.0      | 1.7     | 0.001  |
| cfdl             | 553553  | complement factor D (adipsin) like                          | 1.55E-02                     | 1.88E-02                     | 7.0      | 8.7      | 7.9     | 0.001  |
| tp53rk           | 553571  | TP53 regulating kinase                                      | 3.53E-02                     | 3.68E-02                     | 22.6     | 0.8      | 23.7    | 0.001  |
| tmx3             | 553578  | thioredoxin-related transmembrane protein 3                 | 1.73E-02                     | 8.76E-03                     | 9.3      | 12.3     | 10.8    | 0.001  |
| lactb            | 553619  | lactamase, beta                                             | 7.88E-03                     | 3.53E-02                     | 14.5     | 16.7     | 15.6    | 0.001  |
| zgc:112180       | 553686  | zgc:112180                                                  | 2.92E-02                     | 3.46E-02                     | 0.7      | 3.2      | 2.0     | 0.001  |
| zgc:112255       | 553695  | zgc:112255                                                  | 6.25E-03                     | 2.01E-02                     | 5.2      | 3.8      | 4.5     | 0.001  |
| zgc:112282       | 553701  | zgc:112282                                                  | 4.31E-03                     | 8.59E-03                     | 4.0      | 4.2      | 4.1     | 0.001  |
| mrpl27           | 553709  | mitochondrial ribosomal protein L27                         | 1.29E-02                     | 3.42E-02                     | 1.7      | 3.0      | 2.4     | 0.001  |
| zgc:109977       | 553766  | zgc:109977                                                  | 3.02E-02                     | 3.02E-02                     | 4.8      | 2.5      | 3.7     | 0.001  |
| zgc:110034       | 553771  | zgc:110034                                                  | 1.15E-02                     | 4.20E-02                     | 0.2      | 1.3      | 0.8     | 0.001  |
| gtpbp3           | 553807  | GTP binding protein 3                                       | 3.99E-03                     | 6.13E-03                     | 2.8      | 2.7      | 2.8     | 0.001  |
| pcdh1g18         | 554005  | protocadherin 1 gamma 18                                    | 3.31E-02                     | 3.29E-02                     | 14.1     | 15.0     | 14.5    | 0.001  |
| pcdh1g26         | 554012  | protocadherin 1 gamma 26                                    | 6.92E-04                     | 8.14E-03                     | 14.5     | 14.0     | 14.3    | 0.001  |
| pcdh2g20         | 554067  | protocadherin 2 gamma 20                                    | 2.37E-02                     | 5.72E-05                     | 16.5     | 16.2     | 16.4    | 0.001  |
| rpap2            | 554138  | RNA polymerase II associated protein 2                      | 3.24E-02                     | 1.98E-02                     | 19.0     | 20.2     | 19.6    | 0.001  |
| rorab            | 554722  | RAR-related orphan receptor A, paralog b                    | 1.03E-04                     | 3.06E-03                     | 6.8      | 8.2      | 7.5     | 0.001  |
| cry1b            | 554836  | cryptochrome 1b                                             | 6.40E-03                     | 1.50E-02                     | 5.4      | 7.6      | 6.5     | 0.001  |
| stk24a           | 555297  | serine/threonine kinase 24a (STE20 homolog, yeast)          | 3.94E-02                     | 2.80E-02                     | 2.5      | 3.3      | 2.9     | 0.001  |
| zgc:162780       | 555377  | zgc:162780                                                  | 2.15E-03                     | 1.32E-03                     | 15.3     | 15.7     | 15.5    | 0.001  |
| siae             | 555385  | sialic acid acetyltransferase                               | 1.40E-02                     | 1.13E-02                     | 15.8     | 17.3     | 16.5    | 0.001  |
| si:ch211-242e8.1 | 555427  | si:ch211-242e8.1                                            | 1.86E-02                     | 2.36E-02                     | 22.5     | 0.7      | 23.6    | 0.001  |
| otud5a           | 555459  | OTU domain containing 5a                                    | 5.55E-03                     | 3.46E-02                     | 15.2     | 15.5     | 15.4    | 0.001  |
| LOC555631        | 555631  | riboflavin transporter 2-like                               | 1.70E-03                     | 2.60E-02                     | 4.2      | 5.8      | 5.0     | 0.001  |

**Table S1: Zebrafish circadian oscillating genes**

| Gene Symbol       | Gene ID | Gene Description                                      | Fisher's g test p value (LD) | Fisher's g test p value (DD) | LD Phase | DD Phase | Phase * | FDR ** |
|-------------------|---------|-------------------------------------------------------|------------------------------|------------------------------|----------|----------|---------|--------|
| pcyt1bb           | 555725  | phosphate cytidyltransferase 1, choline, beta b       | 4.11E-03                     | 1.63E-03                     | 3.0      | 4.0      | 3.5     | 0.001  |
| LOC555864         | 555864  | retinol dehydrogenase 10-like                         | 5.83E-06                     | 8.51E-06                     | 3.5      | 4.2      | 3.9     | 0.001  |
| LOC556083         | 556083  | similar to CG11909 CG11909-PA                         | 1.41E-03                     | 6.54E-03                     | 2.7      | 2.8      | 2.8     | 0.001  |
| si:ch211-45m15.1  | 556137  | si:ch211-45m15.1                                      | 3.62E-03                     | 9.45E-03                     | 18.7     | 17.7     | 18.2    | 0.001  |
| nt5dc2            | 556186  | 5'-nucleotidase domain containing 2                   | 9.58E-04                     | 2.41E-03                     | 9.7      | 13.0     | 11.4    | 0.001  |
| pfkfb4            | 556190  | 6-phosphofructo-2-kinase/fructose-2,6-biphosphatase 4 | 3.40E-05                     | 1.77E-03                     | 2.8      | 3.5      | 3.2     | 0.001  |
| acacb             | 556236  | acetyl-CoA carboxylase beta                           | 1.00E-02                     | 1.17E-02                     | 6.3      | 6.7      | 6.5     | 0.001  |
| sept4a            | 556486  | septin 4a                                             | 3.80E-02                     | 1.04E-02                     | 18.8     | 18.2     | 18.5    | 0.001  |
| rdh5              | 556528  | retinol dehydrogenase 5 (11-cis/9-cis)                | 1.07E-02                     | 2.33E-03                     | 5.2      | 3.5      | 4.4     | 0.001  |
| LOC556575         | 556575  | lecithin retinol acyltransferase-like                 | 4.58E-02                     | 2.05E-03                     | 5.3      | 0.0      | 2.7     | 0.001  |
| LOC556578         | 556578  | AMP deaminase 3-like                                  | 6.59E-05                     | 6.56E-04                     | 14.7     | 16.0     | 15.4    | 0.001  |
| trub1             | 556642  | TruB pseudouridine (psi) synthase homolog 1 (E. coli) | 1.87E-02                     | 1.88E-02                     | 0.0      | 1.0      | 0.5     | 0.001  |
| si:dkey-165a24.3  | 556869  | si:dkey-165a24.3                                      | 9.30E-03                     | 2.83E-02                     | 4.5      | 6.2      | 5.4     | 0.001  |
| zgc:154075        | 556929  | zgc:154075                                            | 1.36E-03                     | 4.05E-03                     | 14.7     | 16.5     | 15.6    | 0.001  |
| zgc:123244        | 556933  | zgc:123244                                            | 2.61E-04                     | 2.68E-02                     | 1.7      | 2.5      | 2.1     | 0.001  |
| si:busm1-234g15.3 | 557053  | si:busm1-234g15.3                                     | 1.39E-04                     | 1.45E-03                     | 12.7     | 13.0     | 12.9    | 0.001  |
| antxr2a           | 557239  | anthrax toxin receptor 2a                             | 1.29E-02                     | 1.80E-02                     | 15.2     | 16.8     | 16.0    | 0.001  |
| zgc:175221        | 557286  | zgc:175221                                            | 7.69E-03                     | 2.59E-02                     | 0.0      | 0.5      | 0.3     | 0.001  |
| LOC557394         | 557394  | G-protein coupled receptor 26-like                    | 1.86E-02                     | 1.16E-02                     | 22.2     | 0.3      | 23.3    | 0.001  |
| zgc:198329        | 557409  | zgc:198329                                            | 1.78E-03                     | 4.63E-02                     | 15.5     | 16.3     | 15.9    | 0.001  |
| wu:fk57d06        | 557454  | wu:fk57d06                                            | 3.96E-04                     | 4.78E-02                     | 9.9      | 11.6     | 10.7    | 0.001  |
| nom1              | 557585  | nucleolar protein with MIF4G domain 1                 | 6.57E-03                     | 6.79E-03                     | 0.4      | 2.2      | 1.3     | 0.001  |
| si:ch211-212d10.2 | 557710  | si:ch211-212d10.2                                     | 3.21E-03                     | 2.21E-02                     | 14.8     | 17.3     | 16.1    | 0.001  |
| LOC557884         | 557884  | monocarboxylate transporter 3-like                    | 1.01E-02                     | 3.59E-02                     | 1.8      | 2.5      | 2.2     | 0.001  |
| LOC557975         | 557975  | hypothetical protein LOC557975                        | 7.92E-05                     | 4.68E-03                     | 3.5      | 2.7      | 3.1     | 0.001  |
| si:dkey-12e7.4    | 558132  | si:dkey-12e7.4                                        | 3.97E-02                     | 4.40E-03                     | 13.5     | 16.2     | 14.9    | 0.001  |
| ttll11            | 558156  | tubulin tyrosine ligase-like family, member 11        | 3.95E-02                     | 3.89E-02                     | 16.8     | 17.3     | 17.1    | 0.001  |
| spoplb            | 558170  | speckle-type POZ protein-like b                       | 1.99E-03                     | 3.53E-02                     | 10.0     | 14.5     | 12.3    | 0.001  |
| cyp3c4            | 558541  | cytochrome P450, family 3, subfamily C, polypeptide 4 | 6.80E-03                     | 2.58E-02                     | 0.4      | 2.7      | 1.5     | 0.001  |
| soul4             | 558832  | heme-binding protein soul4                            | 2.92E-05                     | 2.05E-02                     | 13.8     | 16.0     | 14.9    | 0.001  |
| LOC558876         | 558876  | e3 ubiquitin-protein ligase RNF14-like                | 1.05E-04                     | 2.45E-03                     | 4.5      | 4.7      | 4.6     | 0.001  |

**Table S1: Zebrafish circadian oscillating genes**

| Gene Symbol       | Gene ID | Gene Description                                          | Fisher's g test p value (LD) | Fisher's g test p value (DD) | LD Phase | DD Phase | Phase * | FDR ** |
|-------------------|---------|-----------------------------------------------------------|------------------------------|------------------------------|----------|----------|---------|--------|
| dap3              | 559007  | death associated protein 3                                | 3.66E-02                     | 1.67E-02                     | 0.8      | 1.7      | 1.3     | 0.001  |
| LOC559232         | 559232  | regulator of G-protein signaling 9-binding protein-like   | 1.62E-03                     | 2.19E-03                     | 0.7      | 1.0      | 0.9     | 0.001  |
| rorca             | 559245  | RAR-related orphan receptor C a                           | 7.92E-04                     | 1.71E-03                     | 9.5      | 12.0     | 10.8    | 0.001  |
| cspg5b            | 559358  | chondroitin sulfate proteoglycan 5b                       | 1.07E-02                     | 1.15E-02                     | 15.5     | 16.3     | 15.9    | 0.001  |
| si:ch211-103n10.4 | 559384  | si:ch211-103n10.4                                         | 8.79E-03                     | 3.73E-03                     | 16.0     | 16.7     | 16.4    | 0.001  |
| acaca             | 559403  | acetyl-Coenzyme A carboxylase alpha                       | 3.16E-03                     | 2.60E-02                     | 2.2      | 3.5      | 2.9     | 0.001  |
| slc23a1           | 559435  | solute carrier family 23 (nucleobase transporters), memb  | 2.05E-03                     | 1.26E-02                     | 21.9     | 23.0     | 22.4    | 0.001  |
| lman1             | 559775  | lectin, mannose-binding, 1                                | 3.66E-02                     | 7.52E-03                     | 2.0      | 3.0      | 2.5     | 0.001  |
| si:ch211-243g18.2 | 559906  | si:ch211-243g18.2                                         | 4.02E-02                     | 3.02E-02                     | 16.2     | 17.8     | 17.0    | 0.001  |
| LOC559936         | 559936  | PI-PLC X domain-containing protein 3-like                 | 8.30E-03                     | 1.22E-04                     | 11.2     | 12.8     | 12.0    | 0.001  |
| LOC560023         | 560023  | trypsin I-P1-like                                         | 1.41E-02                     | 1.13E-02                     | 14.3     | 18.5     | 16.4    | 0.001  |
| LOC560057         | 560057  | prostaglandin E receptor 4, subtype EP4-like              | 7.08E-03                     | 4.79E-02                     | 2.2      | 2.3      | 2.3     | 0.001  |
| tprg1             | 560596  | tumor protein p63 regulated 1                             | 3.06E-03                     | 4.54E-02                     | 15.5     | 16.2     | 15.9    | 0.001  |
| si:dkey-206f10.1  | 560719  | si:dkey-206f10.1                                          | 2.42E-05                     | 1.59E-02                     | 0.5      | 0.5      | 0.5     | 0.001  |
| zgc:153343        | 560896  | zgc:153343                                                | 9.00E-03                     | 2.21E-02                     | 17.0     | 20.2     | 18.6    | 0.001  |
| plch2             | 560919  | phospholipase C, eta 2                                    | 7.53E-04                     | 1.41E-02                     | 15.3     | 15.8     | 15.6    | 0.001  |
| dazap1            | 561459  | DAZ associated protein 1                                  | 3.99E-03                     | 4.10E-02                     | 18.7     | 18.3     | 18.5    | 0.001  |
| slc4a1b           | 561787  | solute carrier family 4, anion exchanger, member 1b       | 1.58E-02                     | 1.45E-02                     | 22.3     | 22.7     | 22.5    | 0.001  |
| gyg2              | 561803  | glycogenin 2                                              | 7.33E-04                     | 4.11E-03                     | 15.8     | 17.3     | 16.6    | 0.001  |
| opn3              | 561815  | opsin 3 (encephalopsin, panopsin)                         | 1.95E-03                     | 1.35E-02                     | 10.3     | 13.2     | 11.8    | 0.001  |
| si:dkey-218h11.4  | 561964  | si:dkey-218h11.4                                          | 1.93E-03                     | 4.71E-02                     | 16.5     | 21.5     | 19.0    | 0.001  |
| wu:fc07b10        | 562019  | wu:fc07b10                                                | 3.35E-03                     | 2.93E-02                     | 3.4      | 3.1      | 3.3     | 0.001  |
| zcchc24           | 562028  | zinc finger, CCHC domain containing 24                    | 2.92E-02                     | 1.17E-03                     | 11.7     | 15.3     | 13.5    | 0.001  |
| LOC562098         | 562098  | hypothetical protein LOC562098                            | 7.59E-03                     | 1.99E-02                     | 12.0     | 14.5     | 13.3    | 0.001  |
| LOC562104         | 562104  | glutaredoxin domain-containing cysteine-rich protein 1-li | 4.69E-03                     | 2.18E-02                     | 19.8     | 22.2     | 21.0    | 0.001  |
| zgc:198195        | 562304  | zgc:198195                                                | 1.52E-02                     | 3.47E-03                     | 6.5      | 6.6      | 6.5     | 0.001  |
| btr02             | 562439  | bloodthirsty-related gene family, member 2                | 4.50E-02                     | 2.21E-02                     | 3.3      | 3.3      | 3.3     | 0.001  |
| si:dkey-72l14.3   | 562480  | si:dkey-72l14.3                                           | 2.97E-02                     | 2.56E-02                     | 16.0     | 16.0     | 16.0    | 0.001  |
| zgc:152863        | 562658  | zgc:152863                                                | 5.34E-03                     | 6.41E-03                     | 12.8     | 15.8     | 14.3    | 0.001  |
| LOC562752         | 562752  | coiled-coil domain-containing protein 14-like             | 2.47E-02                     | 1.33E-02                     | 8.3      | 8.8      | 8.6     | 0.001  |
| opn4x1            | 563080  | opsin 4x1                                                 | 3.25E-02                     | 4.53E-02                     | 10.8     | 12.5     | 11.7    | 0.001  |

**Table S1: Zebrafish circadian oscillating genes**

| Gene Symbol       | Gene ID | Gene Description                                             | Fisher's g test p value (LD) | Fisher's g test p value (DD) | LD Phase | DD Phase | Phase * | FDR ** |
|-------------------|---------|--------------------------------------------------------------|------------------------------|------------------------------|----------|----------|---------|--------|
| aqp8a.2           | 563130  | aquaporin 8a, tandem duplicate 2                             | 4.01E-03                     | 1.53E-02                     | 1.2      | 1.8      | 1.5     | 0.001  |
| si:ch211-215l11.5 | 563180  | si:ch211-215l11.5                                            | 1.66E-03                     | 4.60E-02                     | 4.3      | 3.4      | 3.8     | 0.001  |
| grsf1             | 563249  | G-rich RNA sequence binding factor 1                         | 1.60E-03                     | 2.76E-02                     | 22.0     | 0.2      | 23.1    | 0.001  |
| ubtd1             | 563264  | ubiquitin domain containing 1                                | 3.03E-02                     | 1.34E-02                     | 1.0      | 0.0      | 0.5     | 0.001  |
| zgc:172079        | 563398  | zgc:172079                                                   | 1.90E-02                     | 1.70E-02                     | 0.5      | 1.3      | 0.9     | 0.001  |
| insl3             | 563417  | insulin-like 3 (Leydig cell)                                 | 2.55E-02                     | 4.25E-02                     | 0.8      | 0.0      | 0.4     | 0.001  |
| LOC563472         | 563472  | novel protein similar to vertebrate potassium channel, su    | 7.77E-03                     | 1.36E-02                     | 23.8     | 22.7     | 23.3    | 0.001  |
| LOC563546         | 563546  | ubiquitin carboxyl-terminal hydrolase 21-like                | 2.23E-06                     | 2.79E-02                     | 1.8      | 0.9      | 1.3     | 0.001  |
| si:dkey-108d22.2  | 563551  | si:dkey-108d22.2                                             | 1.59E-02                     | 3.31E-02                     | 14.8     | 17.2     | 16.0    | 0.001  |
| LOC563744         | 563744  | inward rectifier potassium channel 2-like                    | 4.08E-02                     | 2.90E-02                     | 0.8      | 4.0      | 2.4     | 0.001  |
| bhlhe41           | 563771  | basic helix-loop-helix family, member e41                    | 1.19E-02                     | 4.50E-02                     | 23.8     | 1.3      | 0.5     | 0.001  |
| LOC563777         | 563777  | similar to Proteasome-associated protein ECM29 homolc        | 9.09E-03                     | 1.99E-02                     | 17.8     | 19.3     | 18.6    | 0.001  |
| si:ch211-284a13.1 | 564009  | si:ch211-284a13.1                                            | 5.57E-04                     | 5.86E-04                     | 1.3      | 3.2      | 2.2     | 0.001  |
| lnx2b             | 564464  | ligand of numb-protein X 2b                                  | 4.56E-02                     | 2.28E-03                     | 23.5     | 1.8      | 0.7     | 0.001  |
| dcaf6             | 564498  | ddb1 and cul4 associated factor 6                            | 1.65E-02                     | 4.53E-03                     | 13.7     | 16.8     | 15.3    | 0.001  |
| si:ch211-132b12.7 | 564531  | si:ch211-132b12.7                                            | 3.88E-02                     | 2.96E-02                     | 1.7      | 1.8      | 1.8     | 0.001  |
| ildr2             | 564738  | immunoglobulin-like domain containing receptor 2             | 3.68E-02                     | 2.61E-02                     | 11.2     | 15.3     | 13.3    | 0.001  |
| slc2a11l          | 564849  | solute carrier family 2 (facilitated glucose transporter), m | 1.81E-03                     | 5.18E-03                     | 4.9      | 5.4      | 5.2     | 0.001  |
| zgc:171765        | 564875  | zgc:171765                                                   | 1.99E-04                     | 1.33E-02                     | 1.5      | 1.7      | 1.6     | 0.001  |
| hspa14            | 565232  | heat shock protein 14                                        | 2.17E-02                     | 7.01E-03                     | 23.7     | 1.3      | 0.5     | 0.001  |
| gltpd2            | 565337  | glycolipid transfer protein domain containing 2              | 2.35E-02                     | 4.86E-02                     | 1.0      | 2.7      | 1.9     | 0.001  |
| slc12a3           | 565439  | solute carrier family 12 (sodium/chloride transporters), m   | 7.36E-03                     | 3.63E-03                     | 4.5      | 4.5      | 4.5     | 0.001  |
| grma              | 565450  | glutamate receptor, metabotropic a                           | 6.54E-03                     | 7.21E-03                     | 17.0     | 18.8     | 17.9    | 0.001  |
| mep1a.2           | 565535  | mepriin A, alpha.2                                           | 1.09E-03                     | 1.26E-02                     | 23.5     | 1.2      | 0.4     | 0.001  |
| mylipb            | 565911  | myosin regulatory light chain interacting protein b          | 1.65E-03                     | 1.22E-02                     | 3.3      | 4.2      | 3.8     | 0.001  |
| ift46             | 565922  | intraflagellar transport protein 46                          | 4.46E-02                     | 3.86E-03                     | 13.6     | 15.8     | 14.7    | 0.001  |
| si:ch211-124e16.1 | 565980  | si:ch211-124e16.1                                            | 3.67E-03                     | 4.06E-02                     | 0.0      | 0.8      | 0.4     | 0.001  |
| acss3             | 566019  | acyl-CoA synthetase short-chain family member 3              | 1.47E-02                     | 1.10E-04                     | 7.5      | 7.3      | 7.4     | 0.001  |
| grk7a             | 566120  | G-protein-coupled receptor kinase 7a                         | 1.39E-02                     | 1.40E-02                     | 2.3      | 0.7      | 1.5     | 0.001  |
| LOC566188         | 566188  | phosphatidylinositol 4,5-bisphosphate 5-phosphatase A-I      | 2.25E-03                     | 2.88E-05                     | 3.2      | 2.3      | 2.8     | 0.001  |
| si:dkey-181m9.10  | 566384  | si:dkey-181m9.10                                             | 1.29E-02                     | 1.46E-02                     | 14.0     | 15.8     | 14.9    | 0.001  |

**Table S1: Zebrafish circadian oscillating genes**

| Gene Symbol      | Gene ID | Gene Description                                          | Fisher's g test p value (LD) | Fisher's g test p value (DD) | LD Phase | DD Phase | Phase * | FDR ** |
|------------------|---------|-----------------------------------------------------------|------------------------------|------------------------------|----------|----------|---------|--------|
| slc16a10         | 566499  | solute carrier family 16, member 10 (aromatic amino acid) | 3.31E-03                     | 4.23E-02                     | 21.8     | 23.7     | 22.8    | 0.001  |
| wu:fk66f10       | 566607  | wu:fk66f10                                                | 1.31E-02                     | 1.32E-02                     | 5.0      | 5.8      | 5.4     | 0.001  |
| si:ch73-289a15.2 | 566775  | si:ch73-289a15.2                                          | 1.90E-02                     | 2.61E-02                     | 13.8     | 14.8     | 14.3    | 0.001  |
| mmp14b           | 566945  | matrix metalloproteinase 14b (membrane-inserted)          | 6.94E-03                     | 1.29E-02                     | 14.5     | 16.5     | 15.5    | 0.001  |
| rrbp1            | 567029  | ribosome binding protein 1 homolog (dog)                  | 1.83E-03                     | 1.94E-02                     | 4.5      | 4.7      | 4.6     | 0.001  |
| zgc:152698       | 567084  | zgc:152698                                                | 3.77E-02                     | 1.45E-02                     | 19.2     | 20.3     | 19.8    | 0.001  |
| si:dkey-189l3.1  | 567200  | si:dkey-189l3.1                                           | 2.67E-02                     | 3.71E-02                     | 22.3     | 23.0     | 22.7    | 0.001  |
| LOC567242        | 567242  | similar to cyclic nucleotide gated channel alpha 3        | 1.18E-03                     | 2.39E-02                     | 23.2     | 21.7     | 22.5    | 0.001  |
| LOC567594        | 567594  | uncharacterized protein C7orf50 homolog                   | 2.91E-02                     | 1.13E-02                     | 0.2      | 2.7      | 1.5     | 0.001  |
| slc12a7b         | 567667  | solute carrier family 12, member 7b                       | 1.36E-02                     | 9.52E-03                     | 4.0      | 3.0      | 3.5     | 0.001  |
| mrpl37           | 567819  | mitochondrial ribosomal protein L37                       | 1.25E-02                     | 4.56E-02                     | 0.8      | 2.2      | 1.5     | 0.001  |
| zgc:123246       | 567956  | zgc:123246                                                | 3.49E-03                     | 3.08E-02                     | 13.0     | 15.3     | 14.2    | 0.001  |
| si:dkey-222b8.4  | 568013  | si:dkey-222b8.4                                           | 1.89E-02                     | 4.24E-02                     | 22.7     | 22.8     | 22.7    | 0.001  |
| cacna2d4a        | 568225  | calcium channel, voltage-dependent, alpha 2/delta subunit | 1.70E-02                     | 3.84E-02                     | 16.0     | 15.5     | 15.8    | 0.001  |
| zgc:162232       | 568256  | zgc:162232                                                | 9.16E-03                     | 4.77E-02                     | 10.5     | 14.7     | 12.6    | 0.001  |
| ankrd33ba        | 568270  | ankyrin repeat domain 33ba                                | 3.29E-03                     | 4.96E-05                     | 12.8     | 14.0     | 13.4    | 0.001  |
| si:dkey-22l11.5  | 568328  | si:dkey-22l11.5                                           | 1.67E-02                     | 3.92E-02                     | 23.0     | 23.5     | 23.3    | 0.001  |
| LOC568355        | 568355  | c-type lectin domain family 11 member A-like              | 7.99E-04                     | 4.82E-02                     | 4.3      | 4.5      | 4.4     | 0.001  |
| crb2b            | 568520  | crumbs homolog 2b                                         | 4.61E-03                     | 1.71E-02                     | 16.8     | 16.2     | 16.5    | 0.001  |
| rbm45            | 568524  | RNA binding motif protein 45                              | 1.87E-02                     | 4.93E-02                     | 17.7     | 18.5     | 18.1    | 0.001  |
| si:dkey-3n7.3    | 568579  | si:dkey-3n7.3                                             | 4.62E-03                     | 3.99E-03                     | 14.3     | 16.0     | 15.2    | 0.001  |
| zgc:161979       | 568707  | zgc:161979                                                | 2.16E-03                     | 6.58E-03                     | 2.3      | 4.3      | 3.3     | 0.001  |
| si:dkey-177p2.6  | 568712  | si:dkey-177p2.6                                           | 2.92E-02                     | 1.10E-02                     | 0.5      | 0.0      | 0.3     | 0.001  |
| si:ch211-154o6.7 | 568750  | si:ch211-154o6.7                                          | 7.62E-04                     | 6.56E-03                     | 6.5      | 4.7      | 5.6     | 0.001  |
| nyx              | 568821  | nyctalopin                                                | 6.42E-03                     | 4.47E-03                     | 0.3      | 1.7      | 1.0     | 0.001  |
| LOC568833        | 568833  | claudin-3-like                                            | 9.99E-04                     | 6.84E-03                     | 3.2      | 3.7      | 3.5     | 0.001  |
| gabrr1           | 568984  | gamma-aminobutyric acid (GABA) receptor, rho 1            | 1.87E-06                     | 4.10E-03                     | 3.2      | 3.5      | 3.4     | 0.001  |
| LOC569014        | 569014  | gamma-glutamyltranspeptidase 1-like                       | 8.05E-04                     | 4.82E-03                     | 0.2      | 1.3      | 0.8     | 0.001  |
| LOC569085        | 569085  | thiamine transporter 1-like                               | 4.95E-03                     | 4.98E-02                     | 1.7      | 23.7     | 0.7     | 0.001  |
| zgc:174379       | 569379  | zgc:174379                                                | 2.82E-02                     | 3.36E-03                     | 22.8     | 2.7      | 0.8     | 0.001  |
| lars             | 569778  | leucyl-tRNA synthetase                                    | 3.76E-02                     | 1.00E-03                     | 1.1      | 3.6      | 2.4     | 0.001  |

**Table S1: Zebrafish circadian oscillating genes**

| Gene Symbol       | Gene ID | Gene Description                                              | Fisher's g test p value (LD) | Fisher's g test p value (DD) | LD Phase | DD Phase | Phase * | FDR ** |
|-------------------|---------|---------------------------------------------------------------|------------------------------|------------------------------|----------|----------|---------|--------|
| tspan3b           | 569864  | tetraspanin 3b                                                | 1.62E-02                     | 1.04E-02                     | 13.8     | 15.3     | 14.6    | 0.001  |
| zgc:153896        | 569930  | zgc:153896                                                    | 2.77E-02                     | 1.09E-02                     | 0.3      | 2.2      | 1.3     | 0.001  |
| LOC569958         | 569958  | protein S100-A5-like                                          | 3.45E-05                     | 3.23E-03                     | 6.8      | 7.0      | 6.9     | 0.001  |
| si:dkey-7l6.7     | 569986  | si:dkey-7l6.7                                                 | 7.66E-03                     | 2.28E-02                     | 14.5     | 14.3     | 14.4    | 0.001  |
| si:dkey-183n20.15 | 570411  | si:dkey-183n20.15                                             | 2.62E-04                     | 1.76E-02                     | 15.5     | 15.8     | 15.7    | 0.001  |
| aox1              | 570457  | aldehyde oxidase 1                                            | 3.02E-02                     | 4.81E-02                     | 12.8     | 16.8     | 14.8    | 0.001  |
| LOC570552         | 570552  | novel asparaginase protein                                    | 1.58E-02                     | 1.87E-03                     | 4.3      | 4.8      | 4.6     | 0.001  |
| LOC570693         | 570693  | BTB/POZ domain-containing protein KCTD20-like                 | 1.55E-03                     | 4.24E-03                     | 14.2     | 15.3     | 14.8    | 0.001  |
| zgc:194845        | 570876  | zgc:194845                                                    | 3.24E-02                     | 4.83E-03                     | 14.8     | 15.8     | 15.3    | 0.001  |
| arid3b            | 571249  | AT rich interactive domain 3B (Bright like)                   | 8.88E-04                     | 3.14E-02                     | 14.4     | 15.4     | 14.9    | 0.001  |
| LOC571722         | 571722  | lipid phosphate phosphatase-related protein type 4-like       | 2.23E-03                     | 3.95E-03                     | 13.7     | 14.7     | 14.2    | 0.001  |
| si:ch211-14c7.2   | 571950  | si:ch211-14c7.2                                               | 1.25E-02                     | 1.30E-02                     | 13.5     | 11.6     | 12.6    | 0.001  |
| ido1              | 571967  | indoleamine 2,3-dioxygenase 1                                 | 1.32E-02                     | 1.07E-02                     | 4.1      | 4.5      | 4.3     | 0.001  |
| mrpl9             | 572170  | mitochondrial ribosomal protein L9                            | 1.89E-03                     | 2.50E-02                     | 0.0      | 2.2      | 1.1     | 0.001  |
| tekt3             | 572368  | tektin 3                                                      | 2.95E-02                     | 2.80E-02                     | 14.7     | 16.7     | 15.7    | 0.001  |
| cry2a             | 573209  | cryptochrome 2a                                               | 1.31E-03                     | 6.05E-04                     | 12.3     | 14.3     | 13.3    | 0.001  |
| xpnpep3           | 573360  | X-prolyl aminopeptidase (aminopeptidase P) 3, putative        | 3.28E-02                     | 4.48E-02                     | 1.3      | 1.7      | 1.5     | 0.001  |
| zgc:114108        | 573996  | zgc:114108                                                    | 7.79E-03                     | 8.46E-03                     | 3.6      | 4.4      | 4.0     | 0.001  |
| zgc:113984        | 573997  | zgc:113984                                                    | 4.38E-03                     | 1.94E-02                     | 16.6     | 17.6     | 17.1    | 0.001  |
| zgc:110409        | 574009  | zgc:110409                                                    | 4.93E-03                     | 2.91E-02                     | 21.7     | 23.5     | 22.6    | 0.001  |
| vgl2b             | 606659  | vestigial like 2b                                             | 3.57E-02                     | 2.85E-02                     | 17.8     | 20.0     | 18.9    | 0.001  |
| aqp9a             | 606660  | aquaporin 9a                                                  | 4.09E-04                     | 1.74E-02                     | 22.8     | 0.5      | 23.7    | 0.001  |
| dkc1              | 613144  | dyskeratosis congenita 1, dyskerin                            | 9.08E-03                     | 2.76E-02                     | 22.8     | 1.5      | 0.2     | 0.001  |
| zgc:113338        | 619262  | zgc:113338                                                    | 3.06E-02                     | 4.88E-02                     | 13.7     | 14.3     | 14.0    | 0.001  |
| sagb              | 619268  | S-antigen; retina and pineal gland (arrestin) b               | 1.45E-04                     | 9.48E-03                     | 6.0      | 7.2      | 6.6     | 0.001  |
| zgc:123297        | 641563  | zgc:123297                                                    | 1.26E-02                     | 1.20E-02                     | 17.2     | 17.7     | 17.5    | 0.001  |
| figf              | 678512  | c-fos induced growth factor                                   | 5.82E-03                     | 1.83E-02                     | 2.5      | 4.5      | 3.5     | 0.001  |
| mmp30             | 678531  | matrix metalloproteinase 30                                   | 2.85E-03                     | 4.41E-02                     | 7.3      | 8.3      | 7.8     | 0.001  |
| xkr9              | 678537  | XK, Kell blood group complex subunit-related family, member 9 | 2.87E-03                     | 1.75E-03                     | 3.0      | 3.5      | 3.3     | 0.001  |
| ndrg4             | 692305  | N-myc downstream regulated gene 4                             | 5.69E-03                     | 1.45E-03                     | 14.8     | 15.9     | 15.3    | 0.001  |
| fam102ba          | 724011  | family with sequence similarity 102, member B, a              | 2.84E-03                     | 4.44E-02                     | 3.0      | 3.5      | 3.3     | 0.001  |



**Table S1: Zebrafish circadian oscillating genes**

| Gene Symbol       | Gene ID | Gene Description                                        | Fisher's g test p value (LD) | Fisher's g test p value (DD) | LD Phase | DD Phase | Phase * | FDR ** |
|-------------------|---------|---------------------------------------------------------|------------------------------|------------------------------|----------|----------|---------|--------|
| zgc:153408        | 751633  | zgc:153408                                              | 1.49E-02                     | 2.99E-02                     | 2.3      | 2.0      | 2.2     | 0.001  |
| zgc:153417        | 751659  | zgc:153417                                              | 1.69E-04                     | 4.80E-03                     | 2.5      | 2.5      | 2.5     | 0.001  |
| zgc:153443        | 751686  | zgc:153443                                              | 8.88E-06                     | 6.39E-03                     | 0.3      | 22.0     | 23.2    | 0.001  |
| zgc:153154        | 751701  | zgc:153154                                              | 9.61E-03                     | 4.89E-02                     | 7.7      | 5.6      | 6.6     | 0.001  |
| ms4a17a.16        | 751754  | membrane-spanning 4-domains, subfamily A, member 1'     | 3.57E-02                     | 1.84E-03                     | 18.2     | 18.0     | 18.1    | 0.001  |
| med19a            | 767651  | mediator complex subunit 19a                            | 3.36E-02                     | 3.27E-02                     | 14.5     | 17.8     | 16.2    | 0.001  |
| zgc:153394        | 767653  | zgc:153394                                              | 1.05E-02                     | 1.29E-02                     | 3.4      | 1.3      | 2.3     | 0.001  |
| zgc:153018        | 767701  | zgc:153018                                              | 2.41E-02                     | 7.38E-03                     | 8.5      | 8.2      | 8.4     | 0.001  |
| ugt2a5            | 767705  | UDP glucuronosyltransferase 2 family, polypeptide A5    | 1.10E-03                     | 4.37E-02                     | 15.0     | 16.8     | 15.9    | 0.001  |
| si:ch211-195b13.1 | 768159  | si:ch211-195b13.1                                       | 1.16E-04                     | 1.28E-02                     | 5.7      | 3.3      | 4.5     | 0.001  |
| cyp2x9            | 768288  | cytochrome P450, family 2, subfamily X, polypeptide 9   | 2.20E-02                     | 2.90E-02                     | 3.8      | 4.5      | 4.2     | 0.001  |
| zgc:153629        | 768289  | zgc:153629                                              | 3.47E-03                     | 2.05E-02                     | 5.8      | 6.2      | 6.0     | 0.001  |
| zgc:153914        | 777612  | zgc:153914                                              | 1.54E-03                     | 7.32E-03                     | 3.7      | 3.3      | 3.5     | 0.001  |
| zgc:153521        | 777620  | zgc:153521                                              | 2.50E-02                     | 3.53E-02                     | 13.8     | 15.5     | 14.7    | 0.001  |
| zgc:154093        | 777623  | zgc:154093                                              | 1.99E-05                     | 2.96E-02                     | 3.8      | 3.7      | 3.8     | 0.001  |
| zgc:153892        | 777708  | zgc:153892                                              | 7.32E-03                     | 4.40E-03                     | 6.0      | 5.5      | 5.8     | 0.001  |
| papss2a           | 777719  | 3'-phosphoadenosine 5'-phosphosulfate synthase 2a       | 9.91E-04                     | 2.72E-02                     | 2.8      | 4.3      | 3.6     | 0.001  |
| ubc               | 777766  | ubiquitin C                                             | 4.35E-03                     | 4.69E-02                     | 15.0     | 16.5     | 15.8    | 0.001  |
| zgc:158644        | 791165  | zgc:158644                                              | 6.45E-04                     | 3.84E-02                     | 14.0     | 15.0     | 14.5    | 0.001  |
| zgc:110847        | 791612  | zgc:110847                                              | 7.17E-03                     | 1.04E-02                     | 3.0      | 3.2      | 3.1     | 0.001  |
| sult1st2          | 791732  | sulfotransferase family 1, cytosolic sulfotransferase 2 | 4.84E-05                     | 8.98E-04                     | 5.0      | 6.2      | 5.6     | 0.001  |
| pdxka             | 791775  | pyridoxal (pyridoxine, vitamin B6) kinase a             | 1.81E-03                     | 2.95E-02                     | 6.2      | 6.5      | 6.4     | 0.001  |
| zgc:114201        | 791783  | zgc:114201                                              | 8.00E-03                     | 2.76E-03                     | 4.3      | 6.0      | 5.1     | 0.001  |
| ndrg1             | 792085  | N-myc downstream regulated gene 1                       | 5.42E-03                     | 6.02E-03                     | 15.3     | 15.2     | 15.2    | 0.001  |
| zgc:110259        | 792229  | zgc:110259                                              | 2.35E-05                     | 2.70E-02                     | 14.2     | 16.2     | 15.2    | 0.001  |
| fa2h              | 792257  | fatty acid 2-hydroxylase                                | 4.09E-02                     | 3.24E-02                     | 21.7     | 23.8     | 22.8    | 0.001  |
| c21orf59l         | 792532  | c21orf59 homolog (H. sapiens), like                     | 2.77E-03                     | 9.39E-03                     | 3.0      | 3.0      | 3.0     | 0.001  |
| zgc:162331        | 793007  | zgc:162331                                              | 8.13E-04                     | 2.19E-02                     | 2.3      | 2.8      | 2.6     | 0.001  |
| sb:cb1035         | 793418  | sb:cb1035                                               | 1.88E-04                     | 4.07E-04                     | 16.3     | 16.8     | 16.6    | 0.001  |
| LOC795535         | 795535  | hypothetical protein LOC795535                          | 4.48E-03                     | 1.54E-02                     | 6.7      | 0.2      | 3.5     | 0.001  |
| treh              | 795901  | trehalase (brush-border membrane glycoprotein)          | 1.72E-02                     | 1.38E-02                     | 7.2      | 7.5      | 7.4     | 0.001  |

**Table S1: Zebrafish circadian oscillating genes**

| Gene Symbol       | Gene ID   | Gene Description                                        | Fisher's g test p value (LD) | Fisher's g test p value (DD) | LD Phase | DD Phase | Phase * | FDR ** |
|-------------------|-----------|---------------------------------------------------------|------------------------------|------------------------------|----------|----------|---------|--------|
| si:dkey-167i21.2  | 796588    | si:dkey-167i21.2                                        | 3.58E-04                     | 4.86E-03                     | 21.2     | 20.7     | 21.0    | 0.001  |
| arr3b             | 796867    | arrestin 3b, retinal (X-arrestin)                       | 3.42E-02                     | 2.55E-02                     | 3.3      | 1.5      | 2.4     | 0.001  |
| LOC798349         | 798349    | similar to UDP-Gal:betaGlcNAc beta 1,3-galactosyltransf | 6.62E-03                     | 3.05E-02                     | 2.7      | 4.0      | 3.4     | 0.001  |
| abcb5             | 798527    | ATP-binding cassette, sub-family B (MDR/TAP), member    | 4.47E-05                     | 2.52E-02                     | 4.8      | 6.2      | 5.5     | 0.001  |
| si:ch211-240i19.7 | 799219    | si:ch211-240i19.7                                       | 4.03E-02                     | 9.07E-03                     | 13.5     | 15.3     | 14.4    | 0.001  |
| LOC799768         | 799768    | similar to arrestin domain containing 3                 | 3.25E-02                     | 3.58E-02                     | 5.3      | 2.0      | 3.7     | 0.001  |
| zgc:162180        | 799770    | zgc:162180                                              | 6.61E-04                     | 6.11E-03                     | 4.2      | 5.0      | 4.6     | 0.001  |
| cyp2ad6           | 799957    | cytochrome P450, family 2, subfamily AD, polypeptide 6  | 3.57E-03                     | 1.14E-04                     | 5.2      | 6.0      | 5.6     | 0.001  |
| zgc:162946        | 10000104  | zgc:162946                                              | 2.31E-02                     | 1.44E-02                     | 13.8     | 15.3     | 14.6    | 0.001  |
| LOC10000596       | 10000596  | hypothetical protein LOC10000596                        | 2.97E-03                     | 2.89E-02                     | 8.0      | 5.0      | 6.5     | 0.001  |
| ngb               | 10000711  | neuroglobin                                             | 5.46E-03                     | 3.14E-02                     | 4.0      | 8.3      | 6.2     | 0.001  |
| snx33             | 100001421 | sorting nexin 33                                        | 6.87E-04                     | 7.81E-03                     | 12.3     | 15.5     | 13.9    | 0.001  |
| im:7136021        | 100002065 | im:7136021                                              | 4.84E-04                     | 2.97E-02                     | 21.3     | 22.5     | 21.9    | 0.001  |
| LOC100002893      | 100002893 | zinc transporter ZIP8-like                              | 1.72E-02                     | 1.31E-02                     | 16.0     | 17.0     | 16.5    | 0.001  |
| zgc:165597        | 100002948 | zgc:165597                                              | 6.82E-03                     | 1.67E-02                     | 0.8      | 0.7      | 0.8     | 0.001  |
| zgc:123180        | 100003313 | zgc:123180                                              | 3.86E-02                     | 4.49E-03                     | 0.5      | 1.8      | 1.2     | 0.001  |
| nhp2              | 100003787 | NHP2 ribonucleoprotein homolog (yeast)                  | 9.78E-03                     | 1.82E-02                     | 0.0      | 2.2      | 1.1     | 0.001  |
| zgc:194629        | 100004339 | zgc:194629                                              | 9.52E-03                     | 4.99E-02                     | 2.8      | 3.0      | 2.9     | 0.001  |
| LOC100005130      | 100005130 | calcium homeostasis modulator protein 3-like            | 4.08E-04                     | 4.38E-03                     | 3.7      | 3.8      | 3.8     | 0.001  |
| mettl2a           | 100006618 | methyltransferase like 2A                               | 1.55E-02                     | 3.57E-02                     | 22.3     | 0.0      | 23.2    | 0.001  |
| tdo2a             | 100008541 | tryptophan 2,3-dioxygenase a                            | 6.71E-03                     | 6.15E-03                     | 2.2      | 3.5      | 2.9     | 0.001  |
| slc43a1b          | 100009631 | solute carrier family 43, member 1b                     | 3.76E-03                     | 2.56E-03                     | 23.2     | 0.5      | 23.8    | 0.001  |
| sgpl1             | 100037312 | sphingosine-1-phosphate lyase 1                         | 2.04E-04                     | 2.87E-03                     | 4.7      | 5.6      | 5.1     | 0.001  |
| zgc:162213        | 100037318 | zgc:162213                                              | 2.91E-03                     | 3.55E-02                     | 12.8     | 15.0     | 13.9    | 0.001  |
| mlycd             | 100037349 | malonyl-CoA decarboxylase                               | 1.01E-02                     | 4.90E-02                     | 7.7      | 8.5      | 8.1     | 0.001  |
| zgc:165502        | 100073336 | zgc:165502                                              | 2.15E-03                     | 2.09E-03                     | 2.5      | 3.2      | 2.9     | 0.001  |
| zgc:165423        | 100101646 | zgc:165423                                              | 1.87E-04                     | 2.78E-03                     | 3.7      | 4.8      | 4.3     | 0.001  |
| zgc:171603        | 100141349 | zgc:171603                                              | 3.55E-03                     | 1.35E-02                     | 3.7      | 4.8      | 4.3     | 0.001  |
| mrpl22            | 100142645 | mitochondrial ribosomal protein L22                     | 3.80E-03                     | 2.23E-02                     | 23.3     | 0.3      | 23.8    | 0.001  |
| LOC100147862      | 100147862 | hydrolethalus syndrome protein 1 homolog                | 1.27E-02                     | 3.90E-02                     | 13.0     | 14.5     | 13.8    | 0.001  |
| zgc:55418         | 100149890 | zgc:55418                                               | 2.07E-03                     | 1.74E-02                     | 3.1      | 4.1      | 3.6     | 0.001  |

**Table S1: Zebrafish circadian oscillating genes**

| Gene Symbol       | Gene ID   | Gene Description                                           | Fisher's g test p value (LD) | Fisher's g test p value (DD) | LD Phase | DD Phase | Phase * | FDR ** |
|-------------------|-----------|------------------------------------------------------------|------------------------------|------------------------------|----------|----------|---------|--------|
| si:ch211-191a24.4 | 100150331 | si:ch211-191a24.4                                          | 2.55E-02                     | 6.31E-03                     | 9.7      | 9.2      | 9.5     | 0.001  |
| si:ch211-160b11.4 | 100150558 | si:ch211-160b11.4                                          | 1.07E-03                     | 5.89E-03                     | 17.7     | 18.5     | 18.1    | 0.001  |
| map1aa            | 100151220 | microtubule-associated protein 1Aa                         | 2.26E-02                     | 9.57E-03                     | 14.5     | 13.3     | 13.9    | 0.001  |
| LOC100151479      | 100151479 | urea transporter 2-like                                    | 1.59E-02                     | 2.06E-02                     | 1.2      | 1.8      | 1.5     | 0.001  |
| slc1a7a           | 100170783 | solute carrier family 1 (glutamate transporter), member 7  | 7.54E-03                     | 1.03E-02                     | 14.3     | 15.7     | 15.0    | 0.001  |
| si:dkey-177p2.5   | 100270730 | si:dkey-177p2.5                                            | 7.40E-03                     | 1.69E-02                     | 0.5      | 0.6      | 0.6     | 0.001  |
| im:7165255        | 100318736 | im:7165255                                                 | 1.19E-04                     | 5.42E-03                     | 14.2     | 15.5     | 14.9    | 0.001  |
| LOC100329330      | 100329330 | ral guanine nucleotide dissociation stimulator-like 1-like | 1.18E-02                     | 1.74E-04                     | 13.0     | 14.2     | 13.6    | 0.001  |
| LOC100332005      | 100332005 | hypothetical protein LOC100332005                          | 2.54E-03                     | 3.15E-03                     | 4.3      | 3.7      | 4.0     | 0.001  |
| LOC100332503      | 100332503 | UPF0640 protein C3orf78 homolog                            | 3.79E-03                     | 8.52E-03                     | 1.5      | 1.7      | 1.6     | 0.001  |
| LOC100333680      | 100333680 | hypothetical protein LOC100333680                          | 5.96E-03                     | 2.91E-02                     | 0.7      | 3.3      | 2.0     | 0.001  |
| LOC100333777      | 100333777 | hydroxysteroid 11-beta-dehydrogenase 1-like protein-like   | 9.48E-03                     | 2.44E-02                     | 18.3     | 19.5     | 18.9    | 0.001  |
| LOC100334711      | 100334711 | cyclic nucleotide-gated cation channel alpha-3-like        | 1.28E-02                     | 2.27E-02                     | 1.8      | 23.2     | 0.5     | 0.001  |
| cat               | 30068     | catalase                                                   | 4.73E-02                     | 8.26E-02                     | 11.7     | 13.3     | 12.5    | 0.003  |
| nccrp1            | 30078     | nonspecific cytotoxic cell receptor protein 1              | 3.09E-03                     | 9.88E-02                     | 4.2      | 3.8      | 4.0     | 0.003  |
| clock             | 30140     | clock                                                      | 9.01E-02                     | 2.31E-03                     | 14.0     | 16.2     | 15.1    | 0.003  |
| hoxb1a            | 30337     | homeo box B1a                                              | 7.97E-02                     | 9.39E-02                     | 15.2     | 17.8     | 16.5    | 0.003  |
| dlx3b             | 30585     | distal-less homeobox gene 3b                               | 5.69E-02                     | 2.40E-02                     | 17.8     | 21.0     | 19.4    | 0.003  |
| raraa             | 30680     | retinoic acid receptor, alpha a                            | 7.26E-02                     | 6.53E-02                     | 11.7     | 12.7     | 12.2    | 0.003  |
| hccs              | 58016     | holocytochrome c synthase                                  | 2.04E-04                     | 7.22E-02                     | 2.0      | 0.3      | 1.2     | 0.003  |
| smad3a            | 58092     | MAD homolog 3a (Drosophila)                                | 9.36E-04                     | 7.24E-02                     | 4.7      | 4.3      | 4.5     | 0.003  |
| htatip2           | 64605     | HIV-1 Tat interactive protein 2                            | 3.04E-02                     | 8.38E-02                     | 8.5      | 8.5      | 8.5     | 0.003  |
| rnd3a             | 80963     | Rho family GTPase 3a                                       | 1.28E-02                     | 6.68E-02                     | 16.2     | 17.7     | 17.0    | 0.003  |
| meis3             | 81885     | myeloid ecotropic viral integration site 3                 | 9.86E-02                     | 3.22E-02                     | 13.2     | 13.5     | 13.4    | 0.003  |
| glrba             | 83412     | glycine receptor, beta a                                   | 1.40E-02                     | 6.08E-02                     | 3.0      | 3.2      | 3.1     | 0.003  |
| psma6b            | 83917     | proteasome (prosome, macropain) subunit, alpha type, 6     | 6.84E-03                     | 6.90E-02                     | 19.3     | 20.3     | 19.8    | 0.003  |
| gc3               | 140426    | guanylyl cyclase 3                                         | 8.31E-03                     | 5.26E-02                     | 0.5      | 23.7     | 0.1     | 0.003  |
| xbp1              | 140614    | X-box binding protein 1                                    | 2.25E-02                     | 6.00E-02                     | 2.2      | 3.7      | 3.0     | 0.003  |
| ckbb              | 140744    | creatine kinase, brain b                                   | 7.33E-03                     | 9.61E-02                     | 3.0      | 3.4      | 3.2     | 0.003  |
| rp42-pen          | 192303    | rp42 homolog (pending)                                     | 3.04E-02                     | 5.58E-02                     | 12.7     | 15.3     | 14.0    | 0.003  |
| onecutl           | 246225    | one cut domain, family member, like                        | 5.27E-02                     | 7.58E-02                     | 18.7     | 17.3     | 18.0    | 0.003  |

**Table S1: Zebrafish circadian oscillating genes**

| Gene Symbol     | Gene ID | Gene Description                                          | Fisher's g test p value (LD) | Fisher's g test p value (DD) | LD Phase | DD Phase | Phase * | FDR ** |
|-----------------|---------|-----------------------------------------------------------|------------------------------|------------------------------|----------|----------|---------|--------|
| p2rx4a          | 259258  | purinergic receptor P2X, ligand-gated ion channel, 4a     | 1.31E-03                     | 9.66E-02                     | 18.3     | 19.5     | 18.9    | 0.003  |
| id2a            | 266599  | inhibitor of DNA binding 2, dominant negative helix-loop- | 6.43E-02                     | 4.70E-02                     | 16.8     | 17.9     | 17.3    | 0.003  |
| aldh3d1         | 282559  | aldehyde dehydrogenase 3 family, member D1                | 8.91E-02                     | 3.40E-02                     | 0.8      | 3.8      | 2.3     | 0.003  |
| tim9            | 282678  | translocase of inner mitochondrial membrane 9 homolog     | 4.84E-03                     | 6.99E-02                     | 0.2      | 0.5      | 0.4     | 0.003  |
| impdh2          | 317745  | IMP (inosine monophosphate) dehydrogenase 2               | 7.34E-02                     | 7.77E-02                     | 22.2     | 0.2      | 23.2    | 0.003  |
| nhp2l1          | 321114  | NHP2 non-histone chromosome protein 2-like 1 (S. cerev)   | 1.68E-02                     | 5.17E-02                     | 0.3      | 2.7      | 1.5     | 0.003  |
| si:dkey-91i17.1 | 321130  | si:dkey-91i17.1                                           | 7.65E-02                     | 9.72E-02                     | 23.2     | 1.5      | 0.4     | 0.003  |
| ssb             | 321504  | Sjogren syndrome antigen B (autoantigen La)               | 3.50E-02                     | 9.78E-02                     | 23.1     | 1.7      | 0.4     | 0.003  |
| psmc6           | 321585  | proteasome (prosome, macropain) 26S subunit, ATPase       | 5.79E-02                     | 5.04E-03                     | 18.2     | 20.0     | 19.1    | 0.003  |
| wdr36           | 321745  | WD repeat domain 36                                       | 1.70E-02                     | 6.11E-02                     | 0.8      | 2.0      | 1.4     | 0.003  |
| tgif1           | 321756  | TGFB-induced factor homeobox 1                            | 6.17E-02                     | 4.75E-02                     | 12.3     | 15.0     | 13.7    | 0.003  |
| setd6           | 322348  | SET domain containing 6                                   | 8.27E-02                     | 4.92E-02                     | 1.5      | 4.0      | 2.8     | 0.003  |
| wu:fb62f08      | 322487  | wu:fb62f08                                                | 1.93E-02                     | 5.31E-02                     | 22.5     | 0.7      | 23.6    | 0.003  |
| dnaja2l         | 324164  | DnaJ (Hsp40) homolog, subfamily A, member 2, like         | 5.54E-02                     | 1.22E-02                     | 16.8     | 17.5     | 17.2    | 0.003  |
| si:ch73-73d17.3 | 324212  | si:ch73-73d17.3                                           | 3.20E-04                     | 9.03E-02                     | 5.3      | 5.3      | 5.3     | 0.003  |
| mgea5           | 324487  | meningioma expressed antigen 5 (hyaluronidase)            | 7.71E-03                     | 6.85E-02                     | 14.2     | 15.8     | 15.0    | 0.003  |
| pex19           | 324778  | peroxisomal biogenesis factor 19                          | 2.20E-02                     | 5.59E-02                     | 19.2     | 22.5     | 20.9    | 0.003  |
| zgc:55512       | 325470  | zgc:55512                                                 | 3.86E-02                     | 9.05E-02                     | 12.7     | 16.5     | 14.6    | 0.003  |
| cnp             | 325896  | 2',3'-cyclic nucleotide 3' phosphodiesterase              | 6.58E-02                     | 1.91E-03                     | 1.0      | 0.3      | 0.7     | 0.003  |
| gabara          | 326974  | GABA(A) receptor-associated protein a                     | 7.84E-02                     | 5.95E-02                     | 12.2     | 16.3     | 14.3    | 0.003  |
| lar1            | 327175  | La ribonucleoprotein domain family, member 1              | 1.87E-03                     | 6.97E-02                     | 23.2     | 23.7     | 23.5    | 0.003  |
| sec23b          | 327268  | Sec23 homolog B (S. cerevisiae)                           | 7.01E-02                     | 3.77E-02                     | 1.7      | 2.3      | 2.0     | 0.003  |
| slc9a3r1        | 327272  | solute carrier family 9 (sodium/hydrogen exchanger), me   | 3.48E-02                     | 6.26E-02                     | 22.7     | 1.5      | 0.1     | 0.003  |
| f5              | 327320  | coagulation factor V                                      | 7.27E-02                     | 6.14E-02                     | 0.4      | 0.7      | 0.6     | 0.003  |
| hsd17b12a       | 327417  | hydroxysteroid (17-beta) dehydrogenase 12a                | 1.70E-02                     | 5.29E-02                     | 23.5     | 0.3      | 23.9    | 0.003  |
| mical2b         | 327592  | mical-like 2b                                             | 2.40E-04                     | 9.71E-02                     | 15.5     | 18.2     | 16.9    | 0.003  |
| hsd11b2         | 334098  | hydroxysteroid 11-beta dehydrogenase 2                    | 5.69E-02                     | 3.40E-04                     | 13.7     | 16.3     | 15.0    | 0.003  |
| mat1a           | 334195  | methionine adenosyltransferase I, alpha                   | 7.24E-02                     | 1.31E-02                     | 2.5      | 3.5      | 3.0     | 0.003  |
| osbp2           | 334206  | oxysterol binding protein-like 2                          | 5.59E-02                     | 3.61E-02                     | 2.2      | 3.2      | 2.7     | 0.003  |
| agk             | 334270  | acylglycerol kinase                                       | 3.98E-03                     | 7.84E-02                     | 1.2      | 2.2      | 1.7     | 0.003  |
| pls1            | 334273  | plastin 1 (I isoform)                                     | 1.40E-02                     | 8.98E-02                     | 20.3     | 22.9     | 21.6    | 0.003  |

**Table S1: Zebrafish circadian oscillating genes**

| Gene Symbol      | Gene ID | Gene Description                                                | Fisher's g test p value (LD) | Fisher's g test p value (DD) | LD Phase | DD Phase | Phase * | FDR ** |
|------------------|---------|-----------------------------------------------------------------|------------------------------|------------------------------|----------|----------|---------|--------|
| si:dkey-52h23.1  | 335737  | si:dkey-52h23.1                                                 | 6.96E-02                     | 9.20E-04                     | 12.0     | 14.3     | 13.1    | 0.003  |
| utp11l           | 336149  | UTP11-like, U3 small nucleolar ribonucleoprotein (yeast)        | 8.40E-02                     | 5.07E-02                     | 22.8     | 0.5      | 23.7    | 0.003  |
| wu:fj53d07       | 336170  | wu:fj53d07                                                      | 5.55E-02                     | 9.72E-04                     | 17.5     | 17.5     | 17.5    | 0.003  |
| wu:fb12g12       | 336532  | wu:fb12g12                                                      | 3.84E-03                     | 7.03E-02                     | 19.8     | 21.0     | 20.4    | 0.003  |
| zgc:77151        | 337153  | zgc:77151                                                       | 6.10E-02                     | 1.90E-02                     | 13.0     | 13.3     | 13.2    | 0.003  |
| sepx1a           | 352916  | selenoprotein X, 1a                                             | 1.24E-03                     | 6.81E-02                     | 8.0      | 6.5      | 7.3     | 0.003  |
| txnrd1           | 352924  | thioredoxin reductase 1                                         | 5.89E-02                     | 1.90E-02                     | 4.7      | 5.2      | 5.0     | 0.003  |
| anxa4            | 353362  | annexin A4                                                      | 1.30E-02                     | 7.62E-02                     | 4.3      | 4.2      | 4.2     | 0.003  |
| gulp1            | 368404  | GULP, engulfment adaptor PTB domain containing 1                | 2.23E-02                     | 6.70E-02                     | 13.8     | 15.2     | 14.5    | 0.003  |
| snx9             | 368424  | sorting nexin 9                                                 | 1.28E-02                     | 6.12E-02                     | 11.5     | 14.2     | 12.9    | 0.003  |
| wdr75            | 368478  | WD repeat domain 75                                             | 5.57E-02                     | 9.75E-02                     | 21.8     | 11.4     | 16.6    | 0.003  |
| si:busm1-57f23.1 | 368621  | si:busm1-57f23.1                                                | 2.61E-02                     | 5.81E-02                     | 12.3     | 9.3      | 10.8    | 0.003  |
| ctsc             | 368704  | cathepsin C                                                     | 3.52E-03                     | 8.75E-02                     | 15.3     | 17.8     | 16.6    | 0.003  |
| hspa9            | 373085  | heat shock protein 9                                            | 2.59E-03                     | 5.58E-02                     | 2.3      | 2.3      | 2.3     | 0.003  |
| cdh17            | 378452  | cadherin 17, LI cadherin (liver-intestine)                      | 6.23E-02                     | 8.38E-02                     | 0.8      | 3.8      | 2.3     | 0.003  |
| slmo2            | 378855  | slowmo homolog 2 (Drosophila)                                   | 4.16E-04                     | 6.88E-02                     | 2.8      | 2.8      | 2.8     | 0.003  |
| hopx             | 386589  | HOP homeobox                                                    | 1.72E-02                     | 7.07E-02                     | 5.2      | 6.0      | 5.6     | 0.003  |
| fam107b          | 386641  | family with sequence similarity 107, member B                   | 9.65E-02                     | 8.62E-02                     | 4.6      | 3.3      | 4.0     | 0.003  |
| mycb             | 393141  | myelocytomatosis oncogene b                                     | 2.42E-02                     | 8.41E-02                     | 2.8      | 5.2      | 4.0     | 0.003  |
| zgc:56072        | 393159  | zgc:56072                                                       | 7.08E-02                     | 8.83E-02                     | 10.5     | 18.8     | 14.7    | 0.003  |
| fxr2             | 393180  | fragile X mental retardation, autosomal homolog 2               | 1.07E-02                     | 8.84E-02                     | 2.7      | 3.8      | 3.3     | 0.003  |
| zgc:55343        | 393222  | zgc:55343                                                       | 5.82E-02                     | 2.57E-02                     | 1.3      | 2.4      | 1.8     | 0.003  |
| imp3             | 393237  | IMP3, U3 small nucleolar ribonucleoprotein, homolog (yeast)     | 5.13E-03                     | 6.00E-02                     | 0.5      | 2.7      | 1.6     | 0.003  |
| zgc:56565        | 393268  | zgc:56565                                                       | 1.02E-02                     | 6.46E-02                     | 4.4      | 3.6      | 4.0     | 0.003  |
| slc22a7b         | 393320  | solute carrier family 22 (organic anion transporter), member 7b | 2.14E-03                     | 5.32E-02                     | 4.2      | 5.7      | 5.0     | 0.003  |
| zgc:63675        | 393369  | zgc:63675                                                       | 8.69E-02                     | 3.30E-02                     | 13.5     | 14.5     | 14.0    | 0.003  |
| pdcd2            | 393370  | programmed cell death 2                                         | 5.90E-02                     | 2.15E-02                     | 22.8     | 23.3     | 23.1    | 0.003  |
| prmt7            | 393475  | protein arginine N-methyltransferase 7                          | 4.11E-02                     | 7.21E-02                     | 23.3     | 1.2      | 0.3     | 0.003  |
| cyp2k18          | 393484  | cytochrome P450, family 2, subfamily K, polypeptide 18          | 3.79E-02                     | 6.85E-02                     | 11.5     | 12.8     | 12.2    | 0.003  |
| zgc:66337        | 393492  | zgc:66337                                                       | 8.55E-03                     | 5.57E-02                     | 4.2      | 3.5      | 3.9     | 0.003  |
| mfsd4a           | 393503  | major facilitator superfamily domain containing 4a              | 9.22E-02                     | 6.85E-02                     | 15.8     | 16.8     | 16.3    | 0.003  |

**Table S1: Zebrafish circadian oscillating genes**

| Gene Symbol | Gene ID | Gene Description                                        | Fisher's g test p value (LD) | Fisher's g test p value (DD) | LD Phase | DD Phase | Phase * | FDR ** |
|-------------|---------|---------------------------------------------------------|------------------------------|------------------------------|----------|----------|---------|--------|
| psmd2       | 393518  | proteasome (prosome, macropain) 26S subunit, non-ATF    | 6.61E-02                     | 3.27E-02                     | 17.8     | 19.0     | 18.4    | 0.003  |
| tbl1xr1     | 393581  | transducin (beta)-like 1 X-linked receptor 1            | 8.22E-02                     | 8.23E-02                     | 21.0     | 20.8     | 20.9    | 0.003  |
| fam84a      | 393590  | family with sequence similarity 84, member A            | 5.47E-02                     | 5.21E-02                     | 13.8     | 13.7     | 13.8    | 0.003  |
| phactr4b    | 393643  | phosphatase and actin regulator 4b                      | 1.58E-03                     | 6.56E-02                     | 3.2      | 7.7      | 5.5     | 0.003  |
| ndrg1l      | 393665  | N-myc downstream regulated gene 1, like                 | 7.20E-02                     | 6.59E-02                     | 14.0     | 14.7     | 14.3    | 0.003  |
| gnb5b       | 393719  | guanine nucleotide binding protein (G protein), beta 5b | 1.29E-02                     | 8.84E-02                     | 1.3      | 1.7      | 1.5     | 0.003  |
| cox4i2      | 393776  | cytochrome c oxidase subunit IV isoform 2               | 6.55E-02                     | 6.13E-02                     | 15.0     | 15.5     | 15.3    | 0.003  |
| kcnip3l     | 393792  | Kv channel interacting protein 3, calsenilin, like      | 3.63E-03                     | 5.18E-02                     | 2.7      | 3.6      | 3.1     | 0.003  |
| c8g         | 393837  | complement component 8, gamma polypeptide               | 1.48E-02                     | 5.26E-02                     | 16.2     | 16.7     | 16.5    | 0.003  |
| arhgap12    | 393848  | Rho GTPase activating protein 12                        | 3.81E-02                     | 7.79E-02                     | 2.5      | 4.5      | 3.5     | 0.003  |
| myoz2a      | 393873  | myozenin 2a                                             | 6.59E-02                     | 5.53E-03                     | 5.8      | 6.3      | 6.1     | 0.003  |
| pdcd6       | 393925  | programmed cell death 6                                 | 1.73E-04                     | 6.90E-02                     | 5.2      | 5.2      | 5.2     | 0.003  |
| nola1       | 393950  | nucleolar protein family A, member 1 (H/ACA small nucle | 7.26E-02                     | 9.95E-02                     | 23.3     | 2.7      | 1.0     | 0.003  |
| surf6       | 394040  | surfeit 6                                               | 5.15E-02                     | 5.17E-02                     | 23.8     | 2.3      | 1.1     | 0.003  |
| qtrtd1      | 402798  | queuine tRNA-ribosyltransferase domain containing 1     | 8.54E-02                     | 7.30E-02                     | 23.5     | 1.9      | 0.7     | 0.003  |
| zgc:77391   | 402930  | zgc:77391                                               | 7.94E-03                     | 5.64E-02                     | 13.8     | 16.2     | 15.0    | 0.003  |
| pnp6        | 402953  | purine nucleoside phosphorylase 6                       | 3.41E-03                     | 6.86E-02                     | 2.3      | 3.2      | 2.8     | 0.003  |
| ap1m2       | 403021  | adaptor-related protein complex 1, mu 2 subunit         | 5.60E-02                     | 3.90E-03                     | 22.3     | 23.8     | 23.1    | 0.003  |
| cx30.3      | 404725  | connexin 30.3                                           | 8.38E-02                     | 5.32E-02                     | 2.2      | 4.7      | 3.4     | 0.003  |
| cdx1a       | 405762  | caudal type homeo box transcription factor 1 a          | 5.01E-02                     | 9.06E-02                     | 16.3     | 15.3     | 15.8    | 0.003  |
| nfe2l1      | 405781  | nuclear factor, erythroid derived 2,-like 1             | 1.22E-02                     | 8.37E-02                     | 9.1      | 10.0     | 9.5     | 0.003  |
| zgc:77001   | 405847  | zgc:77001                                               | 6.75E-02                     | 3.63E-02                     | 14.8     | 16.0     | 15.4    | 0.003  |
| tomm20a     | 406309  | translocase of outer mitochondrial membrane 20 homolo   | 1.30E-02                     | 8.31E-02                     | 23.7     | 1.6      | 0.7     | 0.003  |
| zfand5a     | 406312  | zinc finger, AN1-type domain 5a                         | 7.05E-02                     | 8.07E-02                     | 19.1     | 21.5     | 20.3    | 0.003  |
| chia.1      | 406323  | chitinase, acidic.1                                     | 1.61E-02                     | 6.08E-02                     | 5.8      | 4.3      | 5.1     | 0.003  |
| thap11      | 406390  | THAP domain containing 11                               | 1.66E-02                     | 5.28E-02                     | 14.3     | 16.0     | 15.2    | 0.003  |
| prrx1a      | 406431  | paired related homeobox 1a                              | 4.09E-03                     | 5.25E-02                     | 15.7     | 19.2     | 17.5    | 0.003  |
| slc25a33    | 406436  | solute carrier family 25, member 33                     | 6.02E-02                     | 2.77E-02                     | 3.7      | 2.5      | 3.1     | 0.003  |
| psma8       | 406445  | proteasome (prosome, macropain) subunit, alpha type, 8  | 1.49E-02                     | 9.26E-02                     | 17.7     | 20.2     | 19.0    | 0.003  |
| slc20a1a    | 406458  | solute carrier family 20, member 1a                     | 7.18E-04                     | 5.74E-02                     | 21.5     | 0.8      | 23.2    | 0.003  |
| zgc:77836   | 406477  | zgc:77836                                               | 2.11E-02                     | 7.55E-02                     | 21.7     | 23.5     | 22.6    | 0.003  |

**Table S1: Zebrafish circadian oscillating genes**

| Gene Symbol | Gene ID | Gene Description                                                   | Fisher's g test p value (LD) | Fisher's g test p value (DD) | LD Phase | DD Phase | Phase * | FDR ** |
|-------------|---------|--------------------------------------------------------------------|------------------------------|------------------------------|----------|----------|---------|--------|
| zgc:85829   | 406561  | zgc:85829                                                          | 7.41E-02                     | 1.94E-02                     | 0.2      | 1.5      | 0.9     | 0.003  |
| rsrc2       | 406566  | arginine/serine-rich coiled-coil 2                                 | 5.00E-02                     | 1.19E-02                     | 16.8     | 18.3     | 17.6    | 0.003  |
| atp5j       | 406599  | ATP synthase, H <sup>+</sup> transporting, mitochondrial F0 comple | 9.34E-02                     | 8.10E-04                     | 1.2      | 4.2      | 2.7     | 0.003  |
| dcun1d5     | 406622  | DCN1, defective in cullin neddylation 1, domain containir          | 7.39E-03                     | 8.91E-02                     | 17.0     | 19.2     | 18.1    | 0.003  |
| cox4nb      | 406679  | cox4 neighbor                                                      | 6.57E-02                     | 1.41E-02                     | 21.3     | 0.0      | 22.7    | 0.003  |
| fpgs        | 406746  | folylpolyglutamate synthase                                        | 2.88E-03                     | 6.71E-02                     | 1.9      | 2.3      | 2.1     | 0.003  |
| ddt         | 415237  | D-dopachrome tautomerase                                           | 5.02E-02                     | 4.75E-02                     | 6.9      | 6.3      | 6.6     | 0.003  |
| impdh1a     | 431724  | inosine 5'-phosphate dehydrogenase 1a                              | 1.11E-02                     | 8.92E-02                     | 1.2      | 2.3      | 1.8     | 0.003  |
| zgc:77060   | 431765  | zgc:77060                                                          | 2.34E-02                     | 7.80E-02                     | 5.8      | 6.0      | 5.9     | 0.003  |
| rbm34       | 436655  | RNA binding motif protein 34                                       | 9.06E-02                     | 5.98E-03                     | 22.5     | 1.5      | 0.0     | 0.003  |
| epdr1       | 436689  | ependymin related protein 1                                        | 5.82E-02                     | 2.52E-02                     | 3.0      | 4.8      | 3.9     | 0.003  |
| gtpbp10     | 436727  | GTP-binding protein 10 (putative)                                  | 1.11E-02                     | 6.74E-02                     | 0.2      | 2.7      | 1.5     | 0.003  |
| ldhbb       | 436747  | lactate dehydrogenase Bb                                           | 5.05E-02                     | 1.80E-02                     | 16.2     | 17.0     | 16.6    | 0.003  |
| fam203a     | 436795  | family with sequence similarity 203, member A                      | 3.89E-02                     | 5.77E-02                     | 23.0     | 1.2      | 0.1     | 0.003  |
| nop16       | 436807  | NOP16 nucleolar protein homolog (yeast)                            | 5.42E-02                     | 2.76E-03                     | 23.7     | 2.0      | 0.9     | 0.003  |
| nup37       | 436892  | nucleoporin 37                                                     | 2.27E-02                     | 9.59E-02                     | 5.0      | 6.0      | 5.5     | 0.003  |
| blvrb       | 436959  | biliverdin reductase B (flavin reductase (NADPH))                  | 1.55E-03                     | 5.86E-02                     | 6.7      | 6.7      | 6.7     | 0.003  |
| ophn1       | 436982  | oligophrenin 1                                                     | 3.84E-02                     | 9.09E-02                     | 13.3     | 11.3     | 12.3    | 0.003  |
| imp4        | 436992  | IMP4, U3 small nucleolar ribonucleoprotein, homolog (ye            | 7.14E-02                     | 3.54E-02                     | 0.0      | 1.8      | 0.9     | 0.003  |
| dimt1l      | 445162  | DIM1 dimethyladenosine transferase 1-like (S. cerevisiae)          | 8.62E-02                     | 4.34E-02                     | 23.8     | 2.0      | 0.9     | 0.003  |
| dnajb1a     | 445177  | DnaJ (Hsp40) homolog, subfamily B, member 1a                       | 1.88E-02                     | 5.26E-02                     | 3.7      | 3.7      | 3.7     | 0.003  |
| ncaldb      | 445319  | neurocalcin delta b                                                | 1.27E-02                     | 5.36E-02                     | 0.3      | 1.3      | 0.8     | 0.003  |
| polr1d      | 445412  | polymerase (RNA) I polypeptide D                                   | 4.75E-02                     | 7.94E-02                     | 0.3      | 1.3      | 0.8     | 0.003  |
| nfil3       | 445509  | nuclear factor, interleukin 3 regulated                            | 6.69E-02                     | 2.29E-02                     | 12.7     | 16.2     | 14.5    | 0.003  |
| cthl        | 445818  | cystathionase (cystathionine gamma-lyase), like                    | 3.29E-02                     | 8.87E-02                     | 6.0      | 6.0      | 6.0     | 0.003  |
| zgc:92303   | 447842  | zgc:92303                                                          | 5.45E-02                     | 9.62E-02                     | 12.2     | 17.0     | 14.6    | 0.003  |
| cratb       | 447855  | carnitine O-acetyltransferase b                                    | 8.86E-02                     | 5.63E-02                     | 15.5     | 19.2     | 17.4    | 0.003  |
| ap1s3b      | 447897  | adaptor-related protein complex 1, sigma 3 subunit, b              | 5.36E-02                     | 7.47E-02                     | 23.0     | 1.7      | 0.4     | 0.003  |
| adam9       | 447940  | a disintegrin and metalloproteinase domain 9                       | 6.71E-02                     | 7.75E-02                     | 13.3     | 15.8     | 14.6    | 0.003  |
| acox1       | 449662  | acyl-Coenzyme A oxidase 1, palmitoyl                               | 3.21E-03                     | 8.78E-02                     | 6.5      | 5.7      | 6.1     | 0.003  |
| mcf2        | 449676  | multiple coagulation factor deficiency 2                           | 6.87E-02                     | 9.26E-02                     | 22.3     | 0.5      | 23.4    | 0.003  |

**Table S1: Zebrafish circadian oscillating genes**

| Gene Symbol | Gene ID | Gene Description                                           | Fisher's g test p value (LD) | Fisher's g test p value (DD) | LD Phase | DD Phase | Phase * | FDR ** |
|-------------|---------|------------------------------------------------------------|------------------------------|------------------------------|----------|----------|---------|--------|
| zgc:103681  | 449773  | zgc:103681                                                 | 6.04E-02                     | 2.01E-03                     | 3.8      | 4.8      | 4.3     | 0.003  |
| samsn1b     | 450018  | SAM domain, SH3 domain and nuclear localisation signa      | 9.16E-04                     | 7.60E-02                     | 1.5      | 0.5      | 1.0     | 0.003  |
| ankrd9      | 492328  | ankyrin repeat domain 9                                    | 9.47E-03                     | 8.11E-02                     | 4.2      | 2.9      | 3.5     | 0.003  |
| pgam5       | 492357  | phosphoglycerate mutase family member 5                    | 5.14E-02                     | 2.67E-02                     | 16.3     | 16.8     | 16.6    | 0.003  |
| stam2       | 492497  | signal transducing adaptor molecule (SH3 domain and IT     | 1.14E-02                     | 5.24E-02                     | 14.3     | 15.8     | 15.1    | 0.003  |
| zgc:103414  | 492522  | zgc:103414                                                 | 6.13E-02                     | 2.95E-03                     | 21.8     | 23.5     | 22.7    | 0.003  |
| bin2a       | 492780  | bridging integrator 2a                                     | 9.00E-02                     | 2.28E-02                     | 22.3     | 23.2     | 22.8    | 0.003  |
| c3orf58a    | 492795  | C3orf58 chromosome 3 open reading frame 58, a              | 3.36E-02                     | 5.65E-02                     | 13.8     | 17.0     | 15.4    | 0.003  |
| rhous       | 492802  | ras homolog gene family, member Ua                         | 2.69E-03                     | 7.43E-02                     | 5.7      | 5.3      | 5.5     | 0.003  |
| pygl        | 493916  | phosphorylase, glycogen; liver (Hers disease, glycogen s   | 6.75E-02                     | 4.56E-02                     | 18.8     | 18.7     | 18.8    | 0.003  |
| lonp2       | 494030  | lon peptidase 2, peroxisomal                               | 8.77E-03                     | 7.86E-02                     | 11.5     | 14.2     | 12.9    | 0.003  |
| pus1        | 494060  | pseudouridine synthase 1                                   | 5.88E-02                     | 1.02E-02                     | 22.3     | 1.8      | 0.1     | 0.003  |
| guca1d      | 494573  | guanylate cyclase activator 1d                             | 6.69E-02                     | 2.76E-02                     | 2.5      | 2.7      | 2.6     | 0.003  |
| nfybb       | 503744  | nuclear transcription factor Y, beta b                     | 4.27E-03                     | 7.75E-02                     | 15.7     | 18.2     | 17.0    | 0.003  |
| zgc:110308  | 541347  | zgc:110308                                                 | 5.35E-02                     | 4.48E-02                     | 13.9     | 16.5     | 15.2    | 0.003  |
| zgc:103571  | 541401  | zgc:103571                                                 | 3.92E-02                     | 5.23E-02                     | 23.7     | 23.3     | 23.5    | 0.003  |
| slc47a1     | 541497  | solute carrier family 47, member 1                         | 1.70E-02                     | 5.96E-02                     | 2.8      | 3.3      | 3.1     | 0.003  |
| zgc:113364  | 548339  | zgc:113364                                                 | 7.64E-02                     | 4.85E-03                     | 13.8     | 15.7     | 14.8    | 0.003  |
| rhbdl3      | 550128  | rhomboid, veinlet-like 3 (Drosophila)                      | 6.08E-02                     | 7.24E-02                     | 13.3     | 14.5     | 13.9    | 0.003  |
| zgc:110224  | 550335  | zgc:110224                                                 | 4.05E-02                     | 8.38E-02                     | 6.2      | 6.8      | 6.5     | 0.003  |
| pdss1       | 550349  | prenyl (decaprenyl) diphosphate synthase, subunit 1        | 7.07E-03                     | 8.77E-02                     | 23.7     | 0.5      | 0.1     | 0.003  |
| rnmt1a      | 550390  | RNA methyltransferase like 1a                              | 1.57E-02                     | 5.56E-02                     | 22.8     | 0.8      | 23.8    | 0.003  |
| idh3g       | 550408  | isocitrate dehydrogenase 3 (NAD+) gamma                    | 9.94E-02                     | 8.56E-02                     | 15.3     | 18.2     | 16.8    | 0.003  |
| zgc:110182  | 550535  | zgc:110182                                                 | 5.44E-02                     | 8.01E-02                     | 13.2     | 15.0     | 14.1    | 0.003  |
| zgc:112992  | 550608  | zgc:112992                                                 | 1.85E-02                     | 9.26E-02                     | 1.3      | 2.5      | 1.9     | 0.003  |
| crybb3      | 553184  | crystallin, beta B3                                        | 1.41E-02                     | 9.91E-02                     | 10.8     | 15.0     | 12.9    | 0.003  |
| tom1        | 553244  | target of myb1 (chicken)                                   | 4.64E-04                     | 8.75E-02                     | 4.9      | 6.1      | 5.5     | 0.003  |
| ptcd3       | 553325  | pentatricopeptide repeat domain 3                          | 5.23E-02                     | 9.55E-02                     | 22.2     | 23.3     | 22.8    | 0.003  |
| lrit2       | 553557  | leucine-rich repeat, immunoglobulin-like and transmembr    | 1.70E-02                     | 5.55E-02                     | 9.4      | 12.7     | 11.1    | 0.003  |
| zgc:109982  | 553564  | zgc:109982                                                 | 4.91E-03                     | 6.08E-02                     | 21.7     | 0.8      | 23.3    | 0.003  |
| pin4        | 553574  | protein (peptidylprolyl cis/trans isomerase) NIMA-interact | 7.51E-02                     | 8.26E-02                     | 1.7      | 2.2      | 2.0     | 0.003  |



**Table S1: Zebrafish circadian oscillating genes**

| Gene Symbol      | Gene ID | Gene Description                                                             | Fisher's g test p value (LD) | Fisher's g test p value (DD) | LD Phase | DD Phase | Phase * | FDR ** |
|------------------|---------|------------------------------------------------------------------------------|------------------------------|------------------------------|----------|----------|---------|--------|
| zgc:110031       | 553580  | zgc:110031                                                                   | 1.67E-02                     | 5.40E-02                     | 23.8     | 1.8      | 0.8     | 0.003  |
| ube2q1           | 553603  | ubiquitin-conjugating enzyme E2Q (putative) 1                                | 5.13E-02                     | 9.54E-02                     | 15.7     | 18.0     | 16.9    | 0.003  |
| hrasb            | 553656  | -Ha-ras Harvey rat sarcoma viral oncogene homolog b                          | 2.34E-02                     | 6.21E-02                     | 15.0     | 14.0     | 14.5    | 0.003  |
| galnt7           | 553668  | UDP-N-acetyl-alpha-D-galactosamine: polypeptide N-acetyltransferase 7        | 8.84E-02                     | 6.95E-02                     | 6.3      | 7.7      | 7.0     | 0.003  |
| mgat3            | 553676  | mannosyl (beta-1,4-)-glycoprotein beta-1,4-N-acetylglucosaminyltransferase 3 | 9.66E-02                     | 6.02E-02                     | 2.7      | 23.7     | 1.2     | 0.003  |
| zgc:112320       | 553708  | zgc:112320                                                                   | 2.30E-02                     | 9.09E-02                     | 21.3     | 0.4      | 22.9    | 0.003  |
| zgc:110652       | 553790  | zgc:110652                                                                   | 2.70E-02                     | 5.43E-02                     | 2.2      | 4.0      | 3.1     | 0.003  |
| zgc:113305       | 553815  | zgc:113305                                                                   | 3.04E-02                     | 6.09E-02                     | 0.0      | 0.3      | 0.2     | 0.003  |
| gnpnat1          | 554143  | glucosamine-phosphate N-acetyltransferase 1                                  | 2.52E-02                     | 7.62E-02                     | 0.3      | 1.2      | 0.8     | 0.003  |
| psmd1            | 554967  | proteasome (prosome, macropain) 26S subunit, non-ATP dependent               | 8.99E-02                     | 2.39E-02                     | 18.4     | 19.3     | 18.8    | 0.003  |
| acsl1            | 555308  | acyl-CoA synthetase long-chain family member 1                               | 8.83E-02                     | 8.11E-02                     | 3.7      | 4.3      | 4.0     | 0.003  |
| zyg11            | 555349  | zyg-11 homolog (C. elegans)                                                  | 5.21E-03                     | 9.22E-02                     | 12.8     | 14.8     | 13.8    | 0.003  |
| zgc:154142       | 555481  | zgc:154142                                                                   | 1.34E-02                     | 5.89E-02                     | 3.2      | 6.6      | 4.9     | 0.003  |
| slc2a1a          | 555778  | solute carrier family 2 (facilitated glucose transporter), member 1a         | 5.32E-03                     | 9.33E-02                     | 3.2      | 2.8      | 3.0     | 0.003  |
| ppargc1b         | 555906  | peroxisome proliferative activated receptor, gamma, coactivator 1 beta       | 5.54E-02                     | 7.64E-03                     | 21.8     | 10.5     | 16.2    | 0.003  |
| arpc5lb          | 556104  | actin related protein 2/3 complex, subunit 5-like, beta                      | 4.35E-05                     | 6.79E-02                     | 20.2     | 21.7     | 21.0    | 0.003  |
| LOC556362        | 556362  | alkylated DNA repair protein alkB homolog 8-like                             | 4.78E-02                     | 9.46E-02                     | 23.5     | 1.5      | 0.5     | 0.003  |
| mxra8b           | 556385  | matrix-remodelling associated 8b                                             | 4.33E-02                     | 6.05E-02                     | 13.5     | 16.1     | 14.8    | 0.003  |
| si:dkeyp-22b2.3  | 556399  | si:dkeyp-22b2.3                                                              | 2.83E-02                     | 5.16E-02                     | 10.7     | 16.5     | 13.6    | 0.003  |
| LOC556700        | 556700  | similar to sphingomyelin phosphodiesterase 1, acid lysosomal                 | 2.51E-02                     | 5.11E-02                     | 14.2     | 16.3     | 15.3    | 0.003  |
| lrpprc           | 557195  | leucine-rich PPR-motif containing                                            | 1.76E-02                     | 7.27E-02                     | 23.8     | 12.0     | 17.9    | 0.003  |
| pdzd3a           | 557269  | PDZ domain containing 3a                                                     | 1.48E-02                     | 8.52E-02                     | 4.8      | 4.3      | 4.6     | 0.003  |
| chchd1           | 557606  | coiled-coil-helix-coiled-coil-helix domain containing 1                      | 3.04E-02                     | 7.66E-02                     | 0.3      | 0.7      | 0.5     | 0.003  |
| zgc:154015       | 557682  | zgc:154015                                                                   | 1.38E-02                     | 6.15E-02                     | 15.7     | 16.7     | 16.2    | 0.003  |
| hlfb             | 557886  | hepatic leukemia factor b                                                    | 6.15E-02                     | 3.62E-02                     | 13.3     | 15.2     | 14.3    | 0.003  |
| si:ch211-88n13.3 | 558093  | si:ch211-88n13.3                                                             | 3.61E-03                     | 6.89E-02                     | 0.2      | 23.0     | 23.6    | 0.003  |
| cspg5a           | 558206  | chondroitin sulfate proteoglycan 5a                                          | 2.37E-02                     | 6.81E-02                     | 16.6     | 16.2     | 16.4    | 0.003  |
| si:ch211-15d5.5  | 558368  | si:ch211-15d5.5                                                              | 8.14E-03                     | 8.66E-02                     | 3.7      | 3.5      | 3.6     | 0.003  |
| si:dkey-30c15.13 | 558731  | si:dkey-30c15.13                                                             | 6.15E-02                     | 5.05E-02                     | 22.5     | 0.8      | 23.7    | 0.003  |
| si:ch211-89f7.1  | 558964  | si:ch211-89f7.1                                                              | 2.47E-02                     | 5.99E-02                     | 1.8      | 4.7      | 3.3     | 0.003  |
| LOC559575        | 559575  | nuclear receptor coactivator 7-like                                          | 6.39E-02                     | 1.14E-03                     | 1.8      | 3.7      | 2.8     | 0.003  |

**Table S1: Zebrafish circadian oscillating genes**

| Gene Symbol       | Gene ID | Gene Description                                          | Fisher's g test p value (LD) | Fisher's g test p value (DD) | LD Phase | DD Phase | Phase * | FDR ** |
|-------------------|---------|-----------------------------------------------------------|------------------------------|------------------------------|----------|----------|---------|--------|
| si:ch211-106h4.4  | 559790  | si:ch211-106h4.4                                          | 1.97E-02                     | 5.81E-02                     | 2.7      | 2.8      | 2.8     | 0.003  |
| LOC559868         | 559868  | rho guanine nucleotide exchange factor 9-like             | 2.74E-04                     | 8.89E-02                     | 2.0      | 2.2      | 2.1     | 0.003  |
| bmp1b             | 559877  | bone morphogenetic protein 1b                             | 5.19E-02                     | 1.04E-02                     | 16.0     | 16.8     | 16.4    | 0.003  |
| si:dkey-14a7.1    | 559995  | si:dkey-14a7.1                                            | 7.77E-03                     | 5.63E-02                     | 15.5     | 16.7     | 16.1    | 0.003  |
| LOC560410         | 560410  | adenylate cyclase type 8-like                             | 8.23E-02                     | 1.49E-02                     | 17.3     | 17.5     | 17.4    | 0.003  |
| btbd10a           | 560466  | BTB (POZ) domain containing 10a                           | 8.20E-03                     | 6.14E-02                     | 14.8     | 15.7     | 15.3    | 0.003  |
| hspa13            | 560481  | heat shock protein 13                                     | 5.90E-02                     | 5.64E-03                     | 22.0     | 22.8     | 22.4    | 0.003  |
| pycr1             | 560682  | pyrroline-5-carboxylate reductase-like                    | 6.52E-02                     | 6.34E-02                     | 0.2      | 3.2      | 1.7     | 0.003  |
| atp2b1b           | 561190  | ATPase, Ca <sup>++</sup> transporting, plasma membrane 1b | 2.22E-03                     | 9.92E-02                     | 19.8     | 20.7     | 20.3    | 0.003  |
| si:ch211-254d18.3 | 561194  | si:ch211-254d18.3                                         | 1.19E-02                     | 9.71E-02                     | 23.8     | 22.3     | 23.1    | 0.003  |
| tep1              | 561284  | telomerase-associated protein 1                           | 5.63E-02                     | 9.30E-02                     | 2.8      | 3.2      | 3.0     | 0.003  |
| atoh8             | 561606  | atonal homolog 8                                          | 5.81E-02                     | 1.09E-02                     | 17.8     | 20.5     | 19.2    | 0.003  |
| lpgat1            | 561832  | lysophosphatidylglycerol acyltransferase 1                | 4.42E-02                     | 8.75E-02                     | 19.7     | 17.6     | 18.6    | 0.003  |
| vcam1             | 561971  | vascular cell adhesion molecule 1                         | 2.56E-03                     | 8.10E-02                     | 6.0      | 7.5      | 6.8     | 0.003  |
| LOC562156         | 562156  | neurotrypsin-like                                         | 2.82E-02                     | 9.00E-02                     | 23.0     | 0.0      | 23.5    | 0.003  |
| rorcb             | 562258  | RAR-related orphan receptor C b                           | 5.84E-02                     | 2.28E-04                     | 11.5     | 13.3     | 12.4    | 0.003  |
| slc39a4           | 562762  | solute carrier family 39 (zinc transporter), member 4     | 7.11E-02                     | 4.53E-02                     | 2.0      | 2.8      | 2.4     | 0.003  |
| slco1c1           | 562772  | solute carrier organic anion transporter family, member 1 | 7.23E-02                     | 2.22E-02                     | 14.2     | 17.8     | 16.0    | 0.003  |
| LOC563252         | 563252  | protein CBFA2T3-like                                      | 1.38E-02                     | 7.37E-02                     | 17.7     | 17.7     | 17.7    | 0.003  |
| gprc5c            | 563405  | G protein-coupled receptor, family C, group 5, member C   | 3.14E-02                     | 8.78E-02                     | 2.7      | 1.8      | 2.3     | 0.003  |
| ugt5c3            | 563413  | UDP glucuronosyltransferase 5 family, polypeptide C3      | 8.87E-02                     | 2.08E-02                     | 20.5     | 1.3      | 22.9    | 0.003  |
| LOC563672         | 563672  | BTB/POZ domain-containing protein 17-like                 | 3.28E-02                     | 7.36E-02                     | 2.5      | 2.8      | 2.7     | 0.003  |
| per1a             | 563926  | period homolog 1a (Drosophila)                            | 4.59E-02                     | 7.35E-02                     | 23.8     | 2.3      | 1.0     | 0.003  |
| gstt1a            | 563972  | glutathione S-transferase theta 1a                        | 1.79E-02                     | 9.19E-02                     | 12.3     | 13.7     | 13.0    | 0.003  |
| wdr85             | 564032  | WD repeat domain 85                                       | 4.00E-02                     | 7.65E-02                     | 16.2     | 19.5     | 17.9    | 0.003  |
| trmt5             | 564078  | TRM5 tRNA methyltransferase 5 homolog (S. cerevisiae)     | 5.32E-02                     | 5.39E-02                     | 23.4     | 0.9      | 0.1     | 0.003  |
| sb:cb474          | 564134  | sb:cb474                                                  | 1.48E-03                     | 5.39E-02                     | 5.5      | 5.0      | 5.3     | 0.003  |
| ip6k1             | 564478  | inositol hexakisphosphate kinase 1                        | 7.51E-03                     | 6.48E-02                     | 2.0      | 2.2      | 2.1     | 0.003  |
| si:dkeyp-73d8.3   | 564534  | si:dkeyp-73d8.3                                           | 7.93E-05                     | 6.06E-02                     | 21.7     | 21.3     | 21.5    | 0.003  |
| slc5a9            | 564815  | solute carrier family 5 (sodium/glucose cotransporter), m | 5.97E-02                     | 5.79E-03                     | 2.5      | 5.3      | 3.9     | 0.003  |
| spag1             | 564953  | sperm associated antigen 1                                | 6.86E-02                     | 1.54E-02                     | 0.5      | 0.8      | 0.6     | 0.003  |

**Table S1: Zebrafish circadian oscillating genes**

| Gene Symbol      | Gene ID | Gene Description                                         | Fisher's g test p value (LD) | Fisher's g test p value (DD) | LD Phase | DD Phase | Phase * | FDR ** |
|------------------|---------|----------------------------------------------------------|------------------------------|------------------------------|----------|----------|---------|--------|
| LOC566570        | 566570  | solute carrier family 22 member 6-like                   | 5.94E-02                     | 4.33E-03                     | 1.5      | 23.8     | 0.7     | 0.003  |
| LOC566587        | 566587  | ERBB receptor feedback inhibitor 1-like                  | 9.70E-02                     | 1.48E-02                     | 1.0      | 22.3     | 23.7    | 0.003  |
| LOC566599        | 566599  | hypothetical LOC566599                                   | 1.71E-02                     | 5.52E-02                     | 20.7     | 20.7     | 20.7    | 0.003  |
| LOC566659        | 566659  | hypothetical LOC566659                                   | 2.45E-02                     | 9.50E-02                     | 6.0      | 7.7      | 6.9     | 0.003  |
| znf395b          | 566703  | zinc finger protein 395b                                 | 1.40E-03                     | 7.18E-02                     | 0.8      | 3.0      | 1.9     | 0.003  |
| zgc:163083       | 566848  | zgc:163083                                               | 4.15E-04                     | 7.23E-02                     | 3.5      | 3.8      | 3.7     | 0.003  |
| epas1a           | 566886  | endothelial PAS domain protein 1a                        | 3.81E-02                     | 7.99E-02                     | 3.3      | 3.9      | 3.6     | 0.003  |
| ptpm1            | 567019  | protein tyrosine phosphatase, mitochondrial 1            | 3.81E-02                     | 8.10E-02                     | 1.0      | 1.8      | 1.4     | 0.003  |
| LOC567075        | 567075  | hypothetical protein LOC567075                           | 3.08E-03                     | 6.68E-02                     | 23.2     | 21.8     | 22.5    | 0.003  |
| lrmp             | 567234  | lymphoid-restricted membrane protein                     | 1.68E-02                     | 6.88E-02                     | 22.8     | 8.1      | 3.5     | 0.003  |
| agpat9l          | 567414  | 1-acylglycerol-3-phosphate O-acyltransferase 9, like     | 8.97E-04                     | 5.48E-02                     | 4.7      | 4.8      | 4.8     | 0.003  |
| si:ch211-69i14.7 | 567417  | si:ch211-69i14.7                                         | 8.13E-02                     | 5.51E-02                     | 12.0     | 13.5     | 12.8    | 0.003  |
| cbx3b            | 567497  | chromobox homolog 3b                                     | 9.19E-02                     | 6.36E-02                     | 8.0      | 5.0      | 6.5     | 0.003  |
| asb2a            | 567986  | ankyrin repeat and SOCS box-containing 2a                | 1.04E-02                     | 5.73E-02                     | 15.4     | 16.7     | 16.0    | 0.003  |
| zgc:109984       | 568055  | zgc:109984                                               | 6.48E-02                     | 1.22E-02                     | 13.5     | 13.7     | 13.6    | 0.003  |
| wu:fc76b04       | 568156  | wu:fc76b04                                               | 3.38E-02                     | 7.30E-02                     | 23.6     | 2.5      | 1.1     | 0.003  |
| LOC568313        | 568313  | hypothetical protein LOC568313                           | 3.53E-02                     | 6.41E-02                     | 22.0     | 1.0      | 23.5    | 0.003  |
| nars             | 568332  | asparaginyl-tRNA synthetase                              | 3.60E-02                     | 9.35E-02                     | 0.5      | 22.7     | 23.6    | 0.003  |
| LOC568678        | 568678  | similar to PAP-associated domain-containing protein 5 (T | 5.40E-03                     | 5.49E-02                     | 2.3      | 2.7      | 2.5     | 0.003  |
| LOC569046        | 569046  | methyltransferase-like protein 7A-like                   | 5.16E-02                     | 1.79E-03                     | 1.5      | 3.0      | 2.3     | 0.003  |
| si:dkeyp-69b9.5  | 569109  | si:dkeyp-69b9.5                                          | 4.99E-02                     | 6.47E-02                     | 22.0     | 0.5      | 23.3    | 0.003  |
| ecsit            | 569243  | ECSIT homolog (Drosophila)                               | 1.39E-02                     | 7.35E-02                     | 0.1      | 1.1      | 0.6     | 0.003  |
| LOC569518        | 569518  | ankyrin repeat domain-containing protein 33B-like        | 1.92E-03                     | 8.60E-02                     | 3.5      | 1.0      | 2.3     | 0.003  |
| zgc:123347       | 569617  | zgc:123347                                               | 5.21E-02                     | 7.45E-03                     | 1.8      | 2.8      | 2.3     | 0.003  |
| LOC569661        | 569661  | hypothetical protein LOC569661                           | 7.91E-02                     | 5.87E-03                     | 22.2     | 23.3     | 22.8    | 0.003  |
| abcb9            | 570148  | ATP-binding cassette, sub-family B (MDR/TAP), member     | 2.73E-02                     | 9.05E-02                     | 17.6     | 19.7     | 18.6    | 0.003  |
| zgc:123271       | 570159  | zgc:123271                                               | 5.91E-02                     | 3.11E-02                     | 22.3     | 23.7     | 23.0    | 0.003  |
| lrrtm1           | 570385  | leucine rich repeat transmembrane neuronal 1             | 4.94E-02                     | 9.81E-02                     | 16.5     | 16.7     | 16.6    | 0.003  |
| si:dkeyp-84f11.5 | 570476  | si:dkeyp-84f11.5                                         | 3.83E-03                     | 5.65E-02                     | 14.3     | 17.0     | 15.6    | 0.003  |
| letm1            | 570745  | leucine zipper-EF-hand containing transmembrane prote    | 7.10E-02                     | 8.17E-02                     | 22.1     | 22.7     | 22.4    | 0.003  |
| si:dkey-258f14.3 | 571152  | si:dkey-258f14.3                                         | 5.26E-02                     | 8.23E-03                     | 1.8      | 2.5      | 2.2     | 0.003  |

**Table S1: Zebrafish circadian oscillating genes**

| Gene Symbol       | Gene ID | Gene Description                                                    | Fisher's g test p value (LD) | Fisher's g test p value (DD) | LD Phase | DD Phase | Phase * | FDR ** |
|-------------------|---------|---------------------------------------------------------------------|------------------------------|------------------------------|----------|----------|---------|--------|
| zgc:162913        | 571830  | zgc:162913                                                          | 3.73E-02                     | 8.22E-02                     | 14.2     | 17.3     | 15.8    | 0.003  |
| zgc:165520        | 571872  | zgc:165520                                                          | 6.46E-02                     | 2.70E-02                     | 18.8     | 19.8     | 19.3    | 0.003  |
| LOC571944         | 571944  | tripartite motif-containing protein 58-like                         | 2.32E-03                     | 9.56E-02                     | 12.5     | 13.8     | 13.2    | 0.003  |
| nr1d4b            | 571948  | nuclear receptor subfamily 1, group D, member 4b                    | 4.67E-02                     | 7.41E-02                     | 19.0     | 20.5     | 19.8    | 0.003  |
| cyp2ae1           | 572114  | cytochrome P450, family 2, subfamily AE, polypeptide 1              | 5.88E-02                     | 4.69E-03                     | 10.3     | 14.8     | 12.6    | 0.003  |
| mns1              | 573382  | meiosis-specific nuclear structural 1                               | 4.62E-03                     | 6.93E-02                     | 13.2     | 16.7     | 15.0    | 0.003  |
| si:ch211-103f16.2 | 613021  | si:ch211-103f16.2                                                   | 4.75E-02                     | 5.35E-02                     | 0.2      | 1.8      | 1.0     | 0.003  |
| zgc:112334        | 619199  | zgc:112334                                                          | 6.53E-02                     | 2.56E-02                     | 12.8     | 15.0     | 13.9    | 0.003  |
| zgc:109965        | 619266  | zgc:109965                                                          | 3.73E-02                     | 9.30E-02                     | 21.0     | 18.2     | 19.6    | 0.003  |
| zgc:123284        | 641422  | zgc:123284                                                          | 8.85E-02                     | 1.97E-02                     | 4.2      | 6.0      | 5.1     | 0.003  |
| rippy2            | 654447  | rippy2                                                              | 1.75E-02                     | 9.07E-02                     | 4.7      | 5.0      | 4.9     | 0.003  |
| zgc:110045        | 664755  | zgc:110045                                                          | 5.18E-02                     | 5.94E-02                     | 12.3     | 13.5     | 12.9    | 0.003  |
| zgc:136360        | 678588  | zgc:136360                                                          | 7.04E-02                     | 3.89E-02                     | 23.1     | 1.6      | 0.4     | 0.003  |
| unc119b           | 678653  | unc-119 homolog b (C. elegans)                                      | 3.21E-02                     | 7.90E-02                     | 3.3      | 11.9     | 7.6     | 0.003  |
| zgc:136353        | 692303  | zgc:136353                                                          | 1.85E-02                     | 7.62E-02                     | 0.0      | 2.2      | 1.1     | 0.003  |
| zgc:136808        | 692332  | zgc:136808                                                          | 4.04E-02                     | 5.93E-02                     | 4.7      | 4.2      | 4.5     | 0.003  |
| st8sia7.1         | 751830  | ST8 alpha-N-acetyl-neuraminide alpha-2,8-sialyltransferase          | 7.43E-02                     | 3.82E-02                     | 21.8     | 20.8     | 21.3    | 0.003  |
| deptor            | 768177  | DEP domain containing MTOR-interacting protein                      | 3.55E-03                     | 8.16E-02                     | 3.7      | 4.2      | 3.9     | 0.003  |
| zgc:153420        | 768187  | zgc:153420                                                          | 2.20E-02                     | 9.67E-02                     | 0.2      | 1.7      | 1.0     | 0.003  |
| zgc:153423        | 768297  | zgc:153423                                                          | 1.58E-02                     | 9.79E-02                     | 15.4     | 16.0     | 15.7    | 0.003  |
| zgc:152898        | 777614  | zgc:152898                                                          | 5.82E-02                     | 8.86E-02                     | 11.8     | 15.3     | 13.6    | 0.003  |
| zgc:154054        | 777616  | zgc:154054                                                          | 3.43E-02                     | 9.21E-02                     | 11.9     | 1.6      | 6.7     | 0.003  |
| zgc:152965        | 777746  | zgc:152965                                                          | 1.11E-02                     | 6.37E-02                     | 22.8     | 23.8     | 23.3    | 0.003  |
| zgc:158659        | 791141  | zgc:158659                                                          | 5.90E-04                     | 5.32E-02                     | 3.5      | 3.8      | 3.7     | 0.003  |
| zgc:158868        | 791147  | zgc:158868                                                          | 2.81E-03                     | 8.88E-02                     | 5.6      | 5.5      | 5.5     | 0.003  |
| ccb11             | 791592  | cysteine conjugate-beta lyase; cytoplasmic (glutamine transaminase) | 8.77E-02                     | 2.04E-02                     | 3.8      | 4.6      | 4.2     | 0.003  |
| eef2a.1           | 792182  | eukaryotic translation elongation factor 2a, tandem duplication     | 5.54E-02                     | 4.15E-02                     | 0.7      | 1.7      | 1.2     | 0.003  |
| saga              | 792319  | S-antigen; retina and pineal gland (arrestin) a                     | 1.71E-03                     | 9.83E-02                     | 22.7     | 0.8      | 23.7    | 0.003  |
| LOC792903         | 792903  | recoverin-like                                                      | 1.52E-02                     | 5.29E-02                     | 21.3     | 2.5      | 23.9    | 0.003  |
| LOC793794         | 793794  | Krueppel-like factor 10-like                                        | 1.93E-02                     | 7.89E-02                     | 6.0      | 7.5      | 6.8     | 0.003  |
| LOC794083         | 794083  | pyruvate dehydrogenase [lipamide] kinase isozyme 2-lil              | 1.09E-02                     | 9.93E-02                     | 8.8      | 9.7      | 9.3     | 0.003  |

**Table S1: Zebrafish circadian oscillating genes**

| Gene Symbol        | Gene ID   | Gene Description                                        | Fisher's g test p value (LD) | Fisher's g test p value (DD) | LD Phase | DD Phase | Phase * | FDR ** |
|--------------------|-----------|---------------------------------------------------------|------------------------------|------------------------------|----------|----------|---------|--------|
| zgc:162150         | 794783    | zgc:162150                                              | 5.88E-02                     | 1.52E-02                     | 5.7      | 7.3      | 6.5     | 0.003  |
| sema4e             | 796377    | semaphorin 4e                                           | 1.82E-03                     | 5.25E-02                     | 13.2     | 16.7     | 15.0    | 0.003  |
| LOC796577          | 796577    | novel immunoglobulin I-set domain containing protein    | 7.25E-02                     | 1.96E-02                     | 23.2     | 0.5      | 23.9    | 0.003  |
| wu:fk33d07         | 797198    | wu:fk33d07                                              | 8.38E-02                     | 9.79E-02                     | 22.5     | 1.3      | 23.9    | 0.003  |
| LOC797371          | 797371    | tripartite motif-containing protein 39-like             | 2.08E-02                     | 5.29E-02                     | 5.0      | 5.2      | 5.1     | 0.003  |
| tex2               | 798401    | testis expressed 2                                      | 2.31E-02                     | 8.91E-02                     | 13.7     | 13.3     | 13.5    | 0.003  |
| rhbdf1             | 798402    | rhomboid 5 homolog 1 (Drosophila)                       | 6.27E-02                     | 1.80E-02                     | 18.3     | 20.3     | 19.3    | 0.003  |
| LOC799177          | 799177    | heat shock factor binding protein 1-like                | 1.59E-02                     | 7.98E-02                     | 6.3      | 3.8      | 5.1     | 0.003  |
| dio1               | 799937    | deiodinase, iodothyronine, type I                       | 1.07E-02                     | 9.86E-02                     | 5.3      | 3.0      | 4.2     | 0.003  |
| fgfr4              | 100000160 | fibroblast growth factor receptor 4                     | 4.32E-02                     | 7.79E-02                     | 14.7     | 16.0     | 15.3    | 0.003  |
| LOC100000736       | 100000736 | membrane-spanning 4-domains subfamily A member 4A       | 4.45E-02                     | 5.48E-02                     | 16.3     | 17.3     | 16.8    | 0.003  |
| LOC100000962       | 100000962 | hypothetical protein LOC100000962                       | 2.40E-02                     | 7.32E-02                     | 3.7      | 3.3      | 3.5     | 0.003  |
| LOC100001136       | 100001136 | occludin-like                                           | 7.48E-02                     | 9.58E-02                     | 14.7     | 14.5     | 14.6    | 0.003  |
| stard10            | 100001416 | START domain containing 10                              | 4.40E-02                     | 9.72E-02                     | 2.0      | 1.3      | 1.7     | 0.003  |
| LOC100001772       | 100001772 | hypothetical protein LOC100001772                       | 8.49E-02                     | 8.81E-02                     | 3.2      | 4.3      | 3.8     | 0.003  |
| LOC100001838       | 100001838 | solute carrier family 22 member 7-like                  | 5.76E-02                     | 1.98E-02                     | 1.5      | 4.0      | 2.8     | 0.003  |
| si:ch211-283h6.6   | 100001978 | si:ch211-283h6.6                                        | 1.35E-02                     | 8.86E-02                     | 15.2     | 16.3     | 15.8    | 0.003  |
| LOC100002059       | 100002059 | A disintegrin and metalloproteinase with thrombospondin | 6.29E-02                     | 2.75E-02                     | 5.2      | 5.7      | 5.5     | 0.003  |
| tmem70             | 100002535 | transmembrane protein 70                                | 1.16E-02                     | 6.72E-02                     | 21.5     | 23.8     | 22.7    | 0.003  |
| si:ch211-157p22.10 | 100003849 | si:ch211-157p22.10                                      | 6.32E-02                     | 5.02E-02                     | 10.7     | 15.5     | 13.1    | 0.003  |
| LOC100003999       | 100003999 | 2-epi-5-epi-valiolone synthase-like                     | 4.75E-02                     | 9.93E-02                     | 2.2      | 1.2      | 1.7     | 0.003  |
| LOC100004247       | 100004247 | solute carrier family 38, member 8                      | 8.52E-02                     | 1.43E-02                     | 1.2      | 1.8      | 1.5     | 0.003  |
| hal                | 100004331 | histidine ammonia-lyase                                 | 5.82E-02                     | 5.70E-02                     | 16.2     | 17.5     | 16.9    | 0.003  |
| si:dkey-39n1.3     | 100004437 | si:dkey-39n1.3                                          | 2.14E-04                     | 7.55E-02                     | 16.2     | 16.7     | 16.5    | 0.003  |
| zgc:194242         | 100005854 | zgc:194242                                              | 6.74E-02                     | 6.74E-02                     | 5.2      | 5.0      | 5.1     | 0.003  |
| idh1               | 100006589 | isocitrate dehydrogenase 1 (NADP+), soluble             | 1.12E-02                     | 6.25E-02                     | 7.7      | 8.0      | 7.9     | 0.003  |
| LOC100006660       | 100006660 | similar to phosphatidic acid phosphatase type 2d        | 3.14E-02                     | 8.32E-02                     | 16.3     | 16.3     | 16.3    | 0.003  |
| adrb2b             | 100037315 | adrenergic receptor, beta 2b                            | 6.81E-02                     | 1.49E-02                     | 1.0      | 2.3      | 1.7     | 0.003  |
| zgc:162608         | 100037332 | zgc:162608                                              | 7.50E-02                     | 1.87E-03                     | 5.2      | 2.8      | 4.0     | 0.003  |
| zgc:163044         | 100037354 | zgc:163044                                              | 8.54E-02                     | 5.52E-02                     | 12.7     | 16.2     | 14.5    | 0.003  |
| zgc:162495         | 100038771 | zgc:162495                                              | 1.08E-02                     | 9.72E-02                     | 5.8      | 6.0      | 5.9     | 0.003  |

**Table S1: Zebrafish circadian oscillating genes**

| Gene Symbol      | Gene ID   | Gene Description                                           | Fisher's g test p value (LD) | Fisher's g test p value (DD) | LD Phase | DD Phase | Phase * | FDR ** |
|------------------|-----------|------------------------------------------------------------|------------------------------|------------------------------|----------|----------|---------|--------|
| zgc:163121       | 100038790 | zgc:163121                                                 | 4.90E-04                     | 5.29E-02                     | 5.7      | 7.2      | 6.5     | 0.003  |
| ralgps1          | 100101642 | Ral GEF with PH domain and SH3 binding motif 1             | 6.50E-02                     | 5.00E-02                     | 15.0     | 15.1     | 15.0    | 0.003  |
| pnpla8           | 100126812 | patatin-like phospholipase domain containing 8             | 5.19E-02                     | 2.75E-02                     | 13.5     | 14.4     | 13.9    | 0.003  |
| hbl4             | 100137128 | hexose-binding lectin 4                                    | 1.21E-02                     | 9.71E-02                     | 10.8     | 9.1      | 9.9     | 0.003  |
| si:ch211-119o8.7 | 100141334 | si:ch211-119o8.7                                           | 5.38E-02                     | 5.75E-02                     | 15.0     | 15.2     | 15.1    | 0.003  |
| mgam             | 100148922 | maltase-glucoamylase (alpha-glucosidase)                   | 5.21E-02                     | 3.28E-03                     | 3.7      | 7.0      | 5.4     | 0.003  |
| LOC100150195     | 100150195 | gap junction beta-1 protein-like                           | 1.00E-02                     | 6.06E-02                     | 3.7      | 3.7      | 3.7     | 0.003  |
| zgc:194737       | 100170786 | zgc:194737                                                 | 3.81E-03                     | 7.84E-02                     | 2.5      | 1.7      | 2.1     | 0.003  |
| snx19a           | 100170806 | sorting nexin 19a                                          | 3.85E-02                     | 9.75E-02                     | 16.8     | 17.0     | 16.9    | 0.003  |
| si:dkeyp-51f11.8 | 100319971 | si:dkeyp-51f11.8                                           | 8.46E-04                     | 5.69E-02                     | 16.7     | 18.3     | 17.5    | 0.003  |
| LOC100332164     | 100332164 | e3 ubiquitin-protein ligase TRIM9-like                     | 6.67E-02                     | 8.47E-03                     | 16.2     | 15.3     | 15.8    | 0.003  |
| LOC100333000     | 100333000 | hypothetical protein LOC100333000                          | 6.21E-02                     | 1.53E-02                     | 3.0      | 3.7      | 3.4     | 0.003  |
| LOC100333650     | 100333650 | nucleolar pre-ribosomal-associated protein 1-like          | 2.09E-03                     | 9.05E-02                     | 1.3      | 1.3      | 1.3     | 0.003  |
| men1             | 30130     | multiple endocrine neoplasia type 1                        | 8.19E-02                     | 1.46E-01                     | 6.3      | 8.5      | 7.4     | 0.007  |
| mpp7             | 30166     | membrane protein, palmitoylated 7 (MAGUK p55 subfam        | 1.59E-02                     | 1.14E-01                     | 4.3      | 3.3      | 3.8     | 0.007  |
| cx43             | 30236     | connexin 43                                                | 1.20E-01                     | 7.93E-02                     | 0.5      | 3.2      | 1.9     | 0.007  |
| her2             | 30300     | hairy-related 2                                            | 1.05E-01                     | 4.79E-02                     | 4.8      | 5.0      | 4.9     | 0.007  |
| hoxa11b          | 30382     | homeo box A11b                                             | 3.39E-02                     | 1.33E-01                     | 19.5     | 20.3     | 19.9    | 0.007  |
| foxa1            | 30541     | forkhead box A1                                            | 6.22E-02                     | 1.01E-01                     | 13.8     | 15.5     | 14.7    | 0.007  |
| vsx1             | 30598     | visual system homeobox 1 homolog, chx10-like               | 1.15E-01                     | 1.42E-01                     | 15.8     | 15.8     | 15.8    | 0.007  |
| psme3            | 30649     | proteasome activator subunit 3                             | 7.97E-03                     | 1.06E-01                     | 21.1     | 23.2     | 22.2    | 0.007  |
| pdgfra           | 30745     | platelet derived growth factor receptor alpha              | 4.17E-02                     | 1.24E-01                     | 12.5     | 14.2     | 13.4    | 0.007  |
| fgd              | 58075     | faciogenital dysplasia                                     | 6.07E-03                     | 1.02E-01                     | 17.0     | 17.7     | 17.4    | 0.007  |
| pard6gb          | 80959     | par-6 partitioning defective 6 homolog gamma B (C. eleg    | 6.09E-02                     | 1.03E-01                     | 3.2      | 4.7      | 4.0     | 0.007  |
| cry5             | 83776     | cryptochrome 5                                             | 1.14E-01                     | 7.48E-02                     | 5.0      | 3.0      | 4.0     | 0.007  |
| klf2b            | 117509    | Kruppel-like factor 2b                                     | 1.22E-01                     | 4.07E-04                     | 13.5     | 13.5     | 13.5    | 0.007  |
| gnat1            | 140428    | guanine nucleotide binding protein (G protein), alpha trar | 7.83E-02                     | 1.00E-01                     | 15.0     | 14.8     | 14.9    | 0.007  |
| guca1a           | 140430    | guanylate cyclase activator 1A                             | 5.81E-02                     | 1.25E-01                     | 19.7     | 22.3     | 21.0    | 0.007  |
| cebpa            | 140815    | CCAAT/enhancer binding protein (C/EBP), alpha              | 4.36E-02                     | 1.45E-01                     | 21.2     | 11.7     | 16.5    | 0.007  |
| ccng2            | 266794    | cyclin G2                                                  | 3.12E-03                     | 1.11E-01                     | 12.2     | 14.3     | 13.3    | 0.007  |
| dnmt4            | 317744    | DNA (cytosine-5-)-methyltransferase 4                      | 4.41E-02                     | 1.19E-01                     | 1.7      | 2.8      | 2.3     | 0.007  |

**Table S1: Zebrafish circadian oscillating genes**

| Gene Symbol | Gene ID | Gene Description                                      | Fisher's g test p value (LD) | Fisher's g test p value (DD) | LD Phase | DD Phase | Phase * | FDR ** |
|-------------|---------|-------------------------------------------------------|------------------------------|------------------------------|----------|----------|---------|--------|
| sb:cb307    | 321198  | sb:cb307                                              | 1.04E-01                     | 6.96E-02                     | 14.0     | 13.0     | 13.5    | 0.007  |
| pcm1        | 321709  | pericentriolar material 1                             | 4.79E-03                     | 1.02E-01                     | 15.2     | 15.8     | 15.5    | 0.007  |
| keap1a      | 321837  | kelch-like ECH-associated protein 1a                  | 1.64E-02                     | 1.05E-01                     | 5.5      | 5.3      | 5.4     | 0.007  |
| frmd6       | 321937  | FERM domain containing 6                              | 5.16E-03                     | 1.17E-01                     | 14.0     | 16.0     | 15.0    | 0.007  |
| wu:fb38h10  | 321946  | wu:fb38h10                                            | 1.37E-01                     | 3.96E-02                     | 21.2     | 18.2     | 19.7    | 0.007  |
| ddx5        | 322206  | DEAD (Asp-Glu-Ala-Asp) box polypeptide 5              | 3.80E-03                     | 1.02E-01                     | 19.3     | 21.0     | 20.2    | 0.007  |
| rpl711      | 322251  | ribosomal protein L7-like 1                           | 1.47E-01                     | 3.20E-02                     | 12.0     | 1.6      | 6.8     | 0.007  |
| psmd11b     | 322265  | proteasome (prosome, macropain) 216S subunit, non-A1  | 4.83E-02                     | 1.19E-01                     | 16.0     | 17.0     | 16.5    | 0.007  |
| yy1a        | 322397  | YY1 transcription factor a                            | 9.30E-03                     | 1.34E-01                     | 11.7     | 13.7     | 12.7    | 0.007  |
| map1lc3b    | 322425  | microtubule-associated protein 1 light chain 3 beta   | 7.20E-02                     | 1.39E-01                     | 14.1     | 15.8     | 14.9    | 0.007  |
| uap1        | 322513  | UDP-N-acteylglucosamine pyrophosphorylase 1           | 1.22E-01                     | 1.85E-02                     | 12.0     | 12.4     | 12.2    | 0.007  |
| dnajc11     | 322953  | DnaJ (Hsp40) homolog, subfamily C, member 11          | 1.04E-01                     | 1.36E-01                     | 23.7     | 1.5      | 0.6     | 0.007  |
| pgam1a      | 323107  | phosphoglycerate mutase 1a                            | 9.93E-03                     | 1.45E-01                     | 2.3      | 3.8      | 3.1     | 0.007  |
| mat2a       | 323329  | methionine adenosyltransferase II, alpha              | 1.56E-02                     | 1.45E-01                     | 0.5      | 0.8      | 0.7     | 0.007  |
| hnf1bb      | 324283  | HNF1 homeobox Bb                                      | 4.31E-03                     | 1.07E-01                     | 14.3     | 15.3     | 14.8    | 0.007  |
| slc39a6     | 324303  | solute carrier family 39 (zinc transporter), member 6 | 2.23E-02                     | 1.45E-01                     | 18.8     | 19.2     | 19.0    | 0.007  |
| cul3a       | 324655  | cullin 3a                                             | 5.29E-02                     | 1.34E-01                     | 16.8     | 17.8     | 17.3    | 0.007  |
| sppl2       | 325540  | signal peptide peptidase-like 2                       | 2.21E-02                     | 1.43E-01                     | 15.8     | 11.2     | 13.5    | 0.007  |
| zgc:73340   | 326652  | zgc:73340                                             | 1.28E-02                     | 1.20E-01                     | 2.2      | 3.0      | 2.6     | 0.007  |
| zff9        | 326846  | zinc finger protein 9                                 | 9.24E-02                     | 1.49E-01                     | 1.3      | 4.3      | 2.8     | 0.007  |
| rrp15       | 327053  | ribosomal RNA processing 15 homolog (S. cerevisiae)   | 1.31E-01                     | 3.17E-02                     | 23.8     | 1.3      | 0.6     | 0.007  |
| uck2b       | 327057  | uridine-cytidine kinase 2b                            | 1.25E-01                     | 1.24E-01                     | 11.8     | 12.2     | 12.0    | 0.007  |
| inka1b      | 327328  | induced in neural crest by AP2, 1b                    | 1.33E-01                     | 6.12E-02                     | 1.1      | 3.4      | 2.2     | 0.007  |
| ampd3       | 333997  | adenosine monophosphate deaminase 3                   | 5.97E-02                     | 1.28E-01                     | 12.8     | 14.5     | 13.6    | 0.007  |
| spsb1       | 334190  | splA/ryanodine receptor domain and SOCS box containir | 8.60E-03                     | 1.05E-01                     | 13.0     | 14.1     | 13.6    | 0.007  |
| aqp7        | 334529  | aquaporin 7                                           | 1.41E-01                     | 1.02E-01                     | 17.2     | 19.0     | 18.1    | 0.007  |
| synj2bp     | 334599  | synaptojanin 2 binding protein                        | 1.28E-01                     | 1.04E-01                     | 3.5      | 4.2      | 3.9     | 0.007  |
| ccnc        | 335429  | cyclin C                                              | 1.01E-01                     | 1.00E-01                     | 11.3     | 15.5     | 13.4    | 0.007  |
| wu:fj15c08  | 335467  | wu:fj15c08                                            | 1.35E-01                     | 5.31E-02                     | 12.7     | 14.7     | 13.7    | 0.007  |
| ppap2c      | 335485  | phosphatidic acid phosphatase type 2C                 | 6.71E-02                     | 1.50E-01                     | 15.3     | 16.8     | 16.1    | 0.007  |
| dfna5       | 335722  | deafness, autosomal dominant 5                        | 9.29E-02                     | 1.31E-01                     | 12.2     | 14.3     | 13.2    | 0.007  |

**Table S1: Zebrafish circadian oscillating genes**

| Gene Symbol       | Gene ID | Gene Description                                              | Fisher's g test p value (LD) | Fisher's g test p value (DD) | LD Phase | DD Phase | Phase * | FDR ** |
|-------------------|---------|---------------------------------------------------------------|------------------------------|------------------------------|----------|----------|---------|--------|
| chmp1b            | 336426  | chromatin modifying protein 1B                                | 8.59E-02                     | 1.08E-01                     | 15.5     | 17.4     | 16.4    | 0.007  |
| icn               | 336655  | ictacalcin                                                    | 8.22E-02                     | 1.19E-01                     | 6.3      | 7.7      | 7.0     | 0.007  |
| lamp1             | 337357  | lysosomal-associated membrane protein 1                       | 1.39E-01                     | 1.36E-01                     | 14.3     | 15.0     | 14.7    | 0.007  |
| gli1              | 352930  | GLI-Kruppel family member 1                                   | 1.29E-01                     | 9.96E-02                     | 15.0     | 13.8     | 14.4    | 0.007  |
| slc16a1           | 368274  | solute carrier family 16 (monocarboxylic acid transporter)    | 6.27E-02                     | 1.48E-01                     | 2.0      | 2.8      | 2.4     | 0.007  |
| si:ch211-217g15.3 | 368914  | si:ch211-217g15.3                                             | 1.01E-01                     | 3.28E-02                     | 0.3      | 3.0      | 1.7     | 0.007  |
| tjp3              | 373089  | tight junction protein 3                                      | 9.98E-02                     | 1.09E-01                     | 12.9     | 14.6     | 13.7    | 0.007  |
| cbr1              | 373866  | carbonyl reductase 1                                          | 4.31E-04                     | 1.09E-01                     | 5.8      | 3.7      | 4.8     | 0.007  |
| pdcb              | 386614  | phosducin b                                                   | 9.93E-05                     | 1.27E-01                     | 3.2      | 2.4      | 2.8     | 0.007  |
| fli1b             | 386723  | friend leukemia integration 1b                                | 1.02E-01                     | 3.87E-02                     | 13.8     | 14.5     | 14.2    | 0.007  |
| stam              | 386967  | signal transducing adaptor molecule (SH3 domain and IT        | 1.16E-01                     | 1.39E-01                     | 14.7     | 16.9     | 15.8    | 0.007  |
| cyp4t8            | 387527  | cytochrome P450, family 4, subfamily T, polypeptide 8         | 6.59E-03                     | 1.48E-01                     | 7.0      | 6.2      | 6.6     | 0.007  |
| ivns1abpa         | 387591  | influenza virus NS1A binding protein a                        | 1.07E-01                     | 4.06E-02                     | 11.9     | 13.3     | 12.6    | 0.007  |
| lipg              | 393096  | lipase, endothelial                                           | 1.10E-01                     | 5.16E-02                     | 3.8      | 2.5      | 3.2     | 0.007  |
| rad18             | 393106  | RAD18 homolog (S. cerevisiae)                                 | 1.01E-01                     | 3.31E-02                     | 6.0      | 7.5      | 6.8     | 0.007  |
| cyp2p6            | 393108  | cytochrome P450, family 2, subfamily P, polypeptide 6         | 1.12E-02                     | 1.45E-01                     | 5.4      | 6.5      | 6.0     | 0.007  |
| zgc:55634         | 393138  | zgc:55634                                                     | 1.50E-01                     | 9.66E-02                     | 13.3     | 16.0     | 14.7    | 0.007  |
| zgc:55815         | 393145  | zgc:55815                                                     | 8.48E-02                     | 1.41E-01                     | 14.5     | 16.8     | 15.6    | 0.007  |
| usp44             | 393227  | ubiquitin specific peptidase 44                               | 1.32E-01                     | 1.05E-01                     | 13.3     | 14.7     | 14.0    | 0.007  |
| hsd17b3           | 393335  | hydroxysteroid (17-beta) dehydrogenase 3                      | 7.01E-02                     | 1.32E-01                     | 3.8      | 4.5      | 4.2     | 0.007  |
| adam10b           | 393392  | a disintegrin and metalloprotease domain 10b                  | 1.15E-01                     | 4.50E-02                     | 16.3     | 18.0     | 17.2    | 0.007  |
| zgc:63523         | 393573  | zgc:63523                                                     | 1.48E-01                     | 1.32E-02                     | 13.5     | 15.8     | 14.7    | 0.007  |
| slc25a1           | 393579  | solute carrier family 25 (mitochondrial carrier; citrate tran | 2.03E-02                     | 1.30E-01                     | 12.5     | 15.2     | 13.8    | 0.007  |
| cdk11             | 393600  | CDK5 regulatory subunit associated protein 1-like 1           | 3.43E-02                     | 1.35E-01                     | 22.6     | 11.5     | 17.1    | 0.007  |
| ccdc43            | 393631  | coiled-coil domain containing 43                              | 1.18E-01                     | 2.04E-02                     | 23.7     | 1.8      | 0.8     | 0.007  |
| zgc:66030         | 393649  | zgc:66030                                                     | 9.56E-02                     | 1.05E-01                     | 17.2     | 19.0     | 18.1    | 0.007  |
| rwdd3             | 393729  | RWD domain containing 3                                       | 3.87E-02                     | 1.41E-01                     | 13.5     | 16.2     | 14.9    | 0.007  |
| ccdc58            | 393780  | coiled-coil domain containing 58                              | 5.34E-02                     | 1.09E-01                     | 0.2      | 1.2      | 0.7     | 0.007  |
| gnao1b            | 393801  | guanine nucleotide binding protein (G protein), alpha acti    | 1.28E-01                     | 8.48E-02                     | 1.7      | 2.0      | 1.9     | 0.007  |
| zgc:73359         | 393810  | zgc:73359                                                     | 1.16E-03                     | 1.06E-01                     | 1.8      | 3.2      | 2.5     | 0.007  |
| tppp3             | 393825  | tubulin polymerization-promoting protein family member :      | 1.30E-01                     | 5.30E-02                     | 8.2      | 6.8      | 7.5     | 0.007  |



**Table S1: Zebrafish circadian oscillating genes**

| Gene Symbol | Gene ID | Gene Description                                          | Fisher's g test p value (LD) | Fisher's g test p value (DD) | LD Phase | DD Phase | Phase * | FDR ** |
|-------------|---------|-----------------------------------------------------------|------------------------------|------------------------------|----------|----------|---------|--------|
| naprt1      | 393864  | nicotinate phosphoribosyltransferase domain containing    | 1.06E-01                     | 4.90E-02                     | 21.2     | 22.7     | 22.0    | 0.007  |
| uvrag       | 394044  | UV radiation resistance associated gene                   | 1.17E-01                     | 5.41E-02                     | 17.5     | 18.7     | 18.1    | 0.007  |
| minpp1b     | 394075  | multiple inositol polyphosphate histidine phosphatase, 1t | 1.42E-02                     | 1.34E-01                     | 17.3     | 20.0     | 18.7    | 0.007  |
| bokb        | 394160  | BCL2-related ovarian killer b                             | 6.57E-04                     | 1.09E-01                     | 4.7      | 2.3      | 3.5     | 0.007  |
| qars        | 394188  | glutaminyl-tRNA synthetase                                | 6.22E-02                     | 1.09E-01                     | 22.3     | 8.1      | 3.2     | 0.007  |
| kri1l       | 402800  | KRI1 homolog like                                         | 1.44E-01                     | 3.90E-02                     | 22.8     | 1.8      | 0.3     | 0.007  |
| LOC402804   | 402804  | hypothetical LOC402804                                    | 1.01E-01                     | 4.87E-02                     | 15.3     | 16.8     | 16.1    | 0.007  |
| fancg       | 402936  | Fanconi anemia, complementation group G                   | 3.43E-02                     | 1.46E-01                     | 8.2      | 7.7      | 8.0     | 0.007  |
| cry-dash    | 402986  | cryptochrome DASH                                         | 1.30E-01                     | 3.13E-02                     | 4.3      | 2.8      | 3.6     | 0.007  |
| rlbp1b      | 402990  | retinaldehyde binding protein 1b                          | 1.39E-01                     | 8.34E-02                     | 4.4      | 3.4      | 3.9     | 0.007  |
| zgc:111878  | 403024  | zgc:111878                                                | 9.52E-02                     | 1.37E-01                     | 23.3     | 0.8      | 0.1     | 0.007  |
| tbpl1       | 403035  | TBP-like 1                                                | 1.22E-01                     | 7.78E-02                     | 14.3     | 17.7     | 16.0    | 0.007  |
| fbxo25      | 403037  | F-box protein 25                                          | 5.06E-02                     | 1.07E-01                     | 19.6     | 22.8     | 21.2    | 0.007  |
| zgc:77041   | 404632  | zgc:77041                                                 | 1.30E-01                     | 1.29E-01                     | 22.0     | 0.0      | 23.0    | 0.007  |
| arih1l      | 405859  | ariadne homolog, ubiquitin-conjugating enzyme E2 binding  | 1.01E-01                     | 1.35E-01                     | 14.5     | 17.5     | 16.0    | 0.007  |
| mrpl38      | 405881  | mitochondrial ribosomal protein L38                       | 6.01E-02                     | 1.21E-01                     | 12.1     | 0.2      | 6.1     | 0.007  |
| fbf         | 406275  | fibrillarlin                                              | 2.44E-02                     | 1.34E-01                     | 22.6     | 2.3      | 0.4     | 0.007  |
| s100a10b    | 406276  | S100 calcium binding protein A10b                         | 2.77E-02                     | 1.27E-01                     | 6.8      | 6.5      | 6.6     | 0.007  |
| zgc:73347   | 406293  | zgc:73347                                                 | 3.79E-02                     | 1.38E-01                     | 19.3     | 22.8     | 21.1    | 0.007  |
| ubxn4       | 406314  | UBX domain protein 4                                      | 1.47E-01                     | 1.05E-01                     | 15.7     | 19.0     | 17.4    | 0.007  |
| abcf1       | 406467  | ATP-binding cassette, sub-family F (GCN20), member 1      | 1.12E-01                     | 1.28E-02                     | 22.3     | 0.5      | 23.4    | 0.007  |
| pck2        | 406473  | phosphoenolpyruvate carboxykinase 2 (mitochondrial)       | 1.51E-02                     | 1.11E-01                     | 1.8      | 3.5      | 2.7     | 0.007  |
| nudt1       | 406727  | nudix (nucleoside diphosphate linked moiety X)-type motif | 1.39E-01                     | 3.40E-02                     | 4.5      | 6.2      | 5.4     | 0.007  |
| pank1a      | 406789  | pantothenate kinase 1a                                    | 3.28E-05                     | 1.10E-01                     | 23.8     | 22.8     | 23.3    | 0.007  |
| tmem50a     | 406850  | transmembrane protein 50A                                 | 7.04E-03                     | 1.34E-01                     | 16.0     | 19.5     | 17.8    | 0.007  |
| mobk1ab     | 407654  | MOB1, Mps One Binder kinase activator-like 1A (yeast),    | 7.53E-05                     | 1.06E-01                     | 4.6      | 3.7      | 4.1     | 0.007  |
| ddx52       | 407696  | DEAD (Asp-Glu-Ala-Asp) box polypeptide 52                 | 1.43E-01                     | 2.09E-02                     | 23.3     | 3.2      | 1.3     | 0.007  |
| LOC407698   | 407698  | anoctamin 1, calcium activated chloride channel           | 1.29E-01                     | 2.92E-02                     | 14.7     | 15.3     | 15.0    | 0.007  |
| psmd4a      | 415202  | proteasome (prosome, macropain) 26S subunit, non-ATF      | 1.00E-01                     | 6.96E-02                     | 18.8     | 21.5     | 20.1    | 0.007  |
| eaf1        | 415205  | ELL associated factor 1                                   | 1.45E-01                     | 2.20E-02                     | 14.2     | 16.3     | 15.3    | 0.007  |
| dram2       | 415225  | DNA-damage regulated autophagy modulator 2                | 4.70E-02                     | 1.23E-01                     | 14.0     | 16.8     | 15.4    | 0.007  |

**Table S1: Zebrafish circadian oscillating genes**

| Gene Symbol | Gene ID | Gene Description                                          | Fisher's g test p value (LD) | Fisher's g test p value (DD) | LD Phase | DD Phase | Phase * | FDR ** |
|-------------|---------|-----------------------------------------------------------|------------------------------|------------------------------|----------|----------|---------|--------|
| lrrc6       | 432388  | leucine rich repeat containing 6                          | 9.76E-02                     | 1.20E-01                     | 16.2     | 18.7     | 17.5    | 0.007  |
| entpd8      | 436652  | ectonucleoside triphosphate diphosphohydrolase 8          | 2.04E-02                     | 1.02E-01                     | 4.2      | 4.5      | 4.3     | 0.007  |
| mpv17l2     | 436840  | MPV17 mitochondrial membrane protein-like 2               | 5.61E-02                     | 1.15E-01                     | 22.7     | 0.7      | 23.7    | 0.007  |
| tnfsf10l2   | 436866  | tumor necrosis factor (ligand) superfamily, member 10 lik | 4.87E-02                     | 1.38E-01                     | 12.6     | 13.5     | 13.1    | 0.007  |
| zgc:91940   | 436942  | zgc:91940                                                 | 1.06E-01                     | 5.18E-03                     | 2.0      | 1.2      | 1.6     | 0.007  |
| gpr137bb    | 436964  | G protein-coupled receptor 137bb                          | 7.23E-02                     | 1.40E-01                     | 12.7     | 16.5     | 14.6    | 0.007  |
| tftp11      | 436994  | tuftelin interacting protein 11                           | 1.18E-01                     | 1.33E-01                     | 15.7     | 18.5     | 17.1    | 0.007  |
| rs1         | 445044  | retinoschisis (X-linked, juvenile) 1                      | 6.40E-02                     | 1.40E-01                     | 2.2      | 0.7      | 1.5     | 0.007  |
| grwd1       | 445115  | glutamate-rich WD repeat containing 1                     | 2.64E-02                     | 1.08E-01                     | 22.7     | 0.9      | 23.8    | 0.007  |
| polr2eb     | 445170  | polymerase (RNA) II (DNA directed) polypeptide E, b       | 8.45E-02                     | 1.19E-01                     | 1.2      | 2.2      | 1.7     | 0.007  |
| riok3       | 445220  | RIO kinase 3 (yeast)                                      | 7.61E-02                     | 1.47E-01                     | 15.8     | 17.7     | 16.8    | 0.007  |
| mrps23      | 445221  | mitochondrial ribosomal protein S23                       | 2.45E-02                     | 1.24E-01                     | 23.0     | 0.8      | 23.9    | 0.007  |
| wdr55       | 445394  | WD repeat domain 55                                       | 1.32E-01                     | 2.59E-02                     | 1.0      | 3.8      | 2.4     | 0.007  |
| epb41l3a    | 445478  | erythrocyte membrane protein band 4.1-like 3a             | 1.39E-01                     | 5.91E-02                     | 19.5     | 17.5     | 18.5    | 0.007  |
| sdhdb       | 445500  | succinate dehydrogenase complex, subunit D, integral m    | 4.56E-02                     | 1.24E-01                     | 1.3      | 1.3      | 1.3     | 0.007  |
| rimk1a      | 447815  | ribosomal modification protein rimK-like family member A  | 7.02E-02                     | 1.40E-01                     | 12.4     | 13.6     | 13.0    | 0.007  |
| slc35b1     | 447844  | solute carrier family 35, member B1                       | 7.43E-02                     | 1.47E-01                     | 20.7     | 23.7     | 22.2    | 0.007  |
| zgc:92194   | 447849  | zgc:92194                                                 | 1.23E-01                     | 4.08E-02                     | 13.8     | 16.3     | 15.1    | 0.007  |
| rrh         | 447916  | retinal pigment epithelium-derived rhodopsin homolog      | 1.28E-01                     | 9.95E-02                     | 12.7     | 16.7     | 14.7    | 0.007  |
| aqp8a.1     | 447923  | aquaporin 8a, tandem duplicate 1                          | 1.55E-04                     | 1.22E-01                     | 2.2      | 2.2      | 2.2     | 0.007  |
| zgc:92915   | 449650  | zgc:92915                                                 | 1.02E-01                     | 5.73E-02                     | 12.5     | 13.2     | 12.9    | 0.007  |
| zgc:103636  | 449779  | zgc:103636                                                | 1.51E-03                     | 1.17E-01                     | 1.1      | 3.4      | 2.2     | 0.007  |
| polr3glb    | 449786  | polymerase (RNA) III (DNA directed) polypeptide G like t  | 1.08E-01                     | 8.94E-03                     | 9.3      | 10.0     | 9.7     | 0.007  |
| zgc:103545  | 449812  | zgc:103545                                                | 1.48E-01                     | 1.24E-01                     | 23.0     | 2.0      | 0.5     | 0.007  |
| zgc:101827  | 492513  | zgc:101827                                                | 1.47E-01                     | 1.17E-01                     | 13.3     | 16.0     | 14.7    | 0.007  |
| xkrx        | 492765  | XK, Kell blood group complex subunit-related, X-linked    | 1.06E-01                     | 7.10E-02                     | 13.6     | 16.5     | 15.0    | 0.007  |
| efna1b      | 494151  | ephrin A1b                                                | 8.02E-02                     | 1.21E-01                     | 8.7      | 8.7      | 8.7     | 0.007  |
| guca1g      | 494572  | guanylate cyclase activator 1g                            | 1.24E-01                     | 7.02E-02                     | 0.7      | 22.7     | 23.7    | 0.007  |
| ext1c       | 497281  | exostoses (multiple) 1c                                   | 9.83E-02                     | 1.37E-01                     | 17.1     | 17.8     | 17.4    | 0.007  |
| mrpl48      | 503593  | mitochondrial ribosomal protein L48                       | 1.01E-01                     | 3.65E-02                     | 11.9     | 0.9      | 6.4     | 0.007  |
| pthr1       | 503752  | peptidyl-tRNA hydrolase 1 homolog (S. cerevisiae)         | 1.03E-01                     | 1.19E-01                     | 20.8     | 23.2     | 22.0    | 0.007  |

**Table S1: Zebrafish circadian oscillating genes**

| Gene Symbol      | Gene ID | Gene Description                                          | Fisher's g test p value (LD) | Fisher's g test p value (DD) | LD Phase | DD Phase | Phase * | FDR ** |
|------------------|---------|-----------------------------------------------------------|------------------------------|------------------------------|----------|----------|---------|--------|
| zgc:110789       | 503757  | zgc:110789                                                | 3.68E-02                     | 1.03E-01                     | 17.3     | 20.5     | 18.9    | 0.007  |
| zgc:112496       | 541336  | zgc:112496                                                | 1.08E-01                     | 8.30E-02                     | 7.0      | 7.5      | 7.3     | 0.007  |
| zdhhc2           | 541365  | zinc finger, DHHC-type containing 2                       | 2.65E-03                     | 1.36E-01                     | 11.3     | 15.3     | 13.3    | 0.007  |
| tufm             | 541378  | Tu translation elongation factor, mitochondrial           | 1.20E-01                     | 1.43E-02                     | 1.3      | 2.3      | 1.8     | 0.007  |
| zgc:101788       | 541408  | zgc:101788                                                | 2.23E-04                     | 1.42E-01                     | 4.3      | 4.0      | 4.2     | 0.007  |
| pop5             | 541421  | processing of precursor 5, ribonuclease P/MRP subunit (   | 1.26E-01                     | 1.42E-01                     | 0.6      | 1.9      | 1.2     | 0.007  |
| znrd1            | 541428  | zinc ribbon domain containing 1                           | 9.79E-02                     | 1.48E-01                     | 0.3      | 2.2      | 1.3     | 0.007  |
| zgc:110801       | 541536  | zgc:110801                                                | 3.04E-02                     | 1.27E-01                     | 1.0      | 12.8     | 6.9     | 0.007  |
| exosc2           | 550234  | exosome component 2                                       | 1.11E-01                     | 4.43E-02                     | 21.1     | 22.4     | 21.7    | 0.007  |
| cox16            | 550257  | COX16 cytochrome c oxidase assembly homolog (S. cer       | 1.31E-01                     | 1.48E-01                     | 0.2      | 1.5      | 0.9     | 0.007  |
| zgc:110388       | 550350  | zgc:110388                                                | 1.05E-01                     | 9.59E-03                     | 23.8     | 1.8      | 0.8     | 0.007  |
| ppie             | 550373  | peptidylprolyl isomerase E (cyclophilin E)                | 1.13E-01                     | 1.21E-01                     | 23.5     | 1.7      | 0.6     | 0.007  |
| mrpl12           | 550391  | mitochondrial ribosomal protein L12                       | 1.05E-02                     | 1.21E-01                     | 15.7     | 8.4      | 12.1    | 0.007  |
| zgc:110325       | 550504  | zgc:110325                                                | 1.03E-01                     | 2.91E-02                     | 0.9      | 2.6      | 1.7     | 0.007  |
| crif3            | 550515  | cytokine receptor-like factor 3                           | 3.54E-04                     | 1.01E-01                     | 11.3     | 15.3     | 13.3    | 0.007  |
| sema3c           | 553130  | semaphorin 3c                                             | 8.87E-02                     | 1.13E-01                     | 13.3     | 17.8     | 15.6    | 0.007  |
| lmo7a            | 553341  | LIM domain only 7a                                        | 4.86E-02                     | 1.38E-01                     | 2.5      | 2.7      | 2.6     | 0.007  |
| aqp11            | 553476  | aquaporin 11                                              | 6.96E-02                     | 1.36E-01                     | 2.0      | 3.8      | 2.9     | 0.007  |
| si:dkey-251i10.3 | 553498  | si:dkey-251i10.3                                          | 6.56E-02                     | 1.16E-01                     | 21.7     | 12.0     | 16.9    | 0.007  |
| zgc:109995       | 553568  | zgc:109995                                                | 1.48E-01                     | 2.80E-02                     | 22.8     | 1.8      | 0.3     | 0.007  |
| acbd5a           | 553674  | acyl-Coenzyme A binding domain containing 5a              | 1.39E-02                     | 1.47E-01                     | 11.8     | 14.2     | 13.0    | 0.007  |
| zgc:112294       | 553704  | zgc:112294                                                | 1.51E-02                     | 1.04E-01                     | 16.7     | 15.7     | 16.2    | 0.007  |
| pcdh1g3          | 553987  | protocadherin 1 gamma 3                                   | 1.32E-01                     | 3.56E-02                     | 14.7     | 16.8     | 15.8    | 0.007  |
| noc4l            | 554096  | nucleolar complex associated 4 homolog (S. cerevisiae)    | 5.55E-02                     | 1.47E-01                     | 0.7      | 2.2      | 1.5     | 0.007  |
| ctssb.1          | 554157  | cathepsin S, b.1                                          | 6.19E-03                     | 1.03E-01                     | 15.7     | 18.5     | 17.1    | 0.007  |
| myo1e            | 555285  | myosin IE                                                 | 1.04E-01                     | 1.34E-04                     | 11.7     | 12.0     | 11.9    | 0.007  |
| LOC555552        | 555552  | rho-related GTP-binding protein RhoU-like                 | 1.04E-01                     | 4.61E-02                     | 15.7     | 16.5     | 16.1    | 0.007  |
| LOC555692        | 555692  | G patch domain containing 4-like                          | 7.81E-02                     | 1.13E-01                     | 22.0     | 23.3     | 22.7    | 0.007  |
| lpcat1           | 555969  | lysophosphatidylcholine acyltransferase 1                 | 2.83E-02                     | 1.14E-01                     | 4.3      | 5.0      | 4.7     | 0.007  |
| zgc:194768       | 556744  | zgc:194768                                                | 1.39E-01                     | 1.58E-03                     | 7.1      | 7.2      | 7.2     | 0.007  |
| dcun1d4          | 556765  | DCN1, defective in cullin neddylation 1, domain containir | 8.71E-02                     | 1.04E-01                     | 15.8     | 17.5     | 16.7    | 0.007  |

**Table S1: Zebrafish circadian oscillating genes**

| Gene Symbol       | Gene ID | Gene Description                                              | Fisher's g test p value (LD) | Fisher's g test p value (DD) | LD Phase | DD Phase | Phase * | FDR ** |
|-------------------|---------|---------------------------------------------------------------|------------------------------|------------------------------|----------|----------|---------|--------|
| dnajc10           | 557858  | DnaJ (Hsp40) homolog, subfamily C, member 10                  | 1.18E-01                     | 9.19E-02                     | 16.8     | 17.0     | 16.9    | 0.007  |
| thsd7a            | 557991  | thrombospondin, type I, domain containing 7A                  | 3.93E-02                     | 1.22E-01                     | 18.0     | 15.7     | 16.9    | 0.007  |
| st7l              | 558013  | suppression of tumorigenicity 7 like                          | 3.47E-02                     | 1.36E-01                     | 15.8     | 18.0     | 16.9    | 0.007  |
| si:dkey-256k13.1  | 558466  | si:dkey-256k13.1                                              | 9.72E-03                     | 1.12E-01                     | 4.0      | 3.5      | 3.8     | 0.007  |
| LOC558513         | 558513  | similar to Transcription cofactor vestigial-like protein 1 (V | 1.48E-01                     | 1.09E-01                     | 0.8      | 1.7      | 1.3     | 0.007  |
| si:ch211-67e16.9  | 558702  | si:ch211-67e16.9                                              | 6.47E-02                     | 1.43E-01                     | 20.8     | 22.5     | 21.7    | 0.007  |
| cfr               | 559080  | cystic fibrosis transmembrane conductance regulator, AT       | 1.15E-01                     | 1.08E-01                     | 20.3     | 20.3     | 20.3    | 0.007  |
| zgc:158309        | 559124  | zgc:158309                                                    | 4.08E-02                     | 1.07E-01                     | 16.0     | 16.7     | 16.4    | 0.007  |
| LOC559127         | 559127  | similar to AWKS9372                                           | 1.15E-01                     | 4.90E-02                     | 0.8      | 1.5      | 1.2     | 0.007  |
| si:ch211-203k16.3 | 559151  | si:ch211-203k16.3                                             | 6.61E-02                     | 1.46E-01                     | 21.2     | 21.7     | 21.5    | 0.007  |
| im:7152348        | 559250  | im:7152348                                                    | 4.46E-03                     | 1.29E-01                     | 3.7      | 4.0      | 3.9     | 0.007  |
| LOC559268         | 559268  | novel protein similar to vertebrate solute carrier family 4,  | 1.50E-01                     | 1.87E-02                     | 19.3     | 22.0     | 20.7    | 0.007  |
| kbtbd12           | 559380  | kelch repeat and BTB (POZ) domain containing 12               | 2.44E-03                     | 1.05E-01                     | 14.3     | 16.2     | 15.3    | 0.007  |
| mxd4              | 559531  | MAX dimerization protein 4                                    | 4.61E-03                     | 1.24E-01                     | 12.8     | 15.5     | 14.2    | 0.007  |
| aggf1             | 559905  | angiogenic factor with G patch and FHA domains 1              | 1.41E-01                     | 1.19E-01                     | 20.5     | 20.2     | 20.4    | 0.007  |
| slc47a2           | 560024  | solute carrier family 47, member 2                            | 1.87E-03                     | 1.02E-01                     | 3.7      | 3.1      | 3.4     | 0.007  |
| dcaf5             | 560257  | ddb1 and cul4 associated factor 5                             | 3.55E-03                     | 1.20E-01                     | 14.8     | 17.0     | 15.9    | 0.007  |
| LOC560530         | 560530  | somatostatin receptor type 2-like                             | 1.16E-01                     | 2.36E-02                     | 0.2      | 2.0      | 1.1     | 0.007  |
| LOC561494         | 561494  | similar to interleukin 17 receptor                            | 4.92E-02                     | 1.47E-01                     | 13.0     | 15.8     | 14.4    | 0.007  |
| ddx59             | 562123  | DEAD (Asp-Glu-Ala-Asp) box polypeptide 59                     | 1.03E-01                     | 5.71E-02                     | 13.8     | 16.2     | 15.0    | 0.007  |
| mrps5             | 562703  | mitochondrial ribosomal protein S5                            | 1.38E-01                     | 2.13E-02                     | 23.2     | 1.7      | 0.5     | 0.007  |
| mxra8a            | 562784  | matrix-remodelling associated 8a                              | 1.93E-03                     | 1.21E-01                     | 13.5     | 15.9     | 14.7    | 0.007  |
| mavs              | 562867  | mitochondrial antiviral signaling protein                     | 5.25E-02                     | 1.06E-01                     | 21.7     | 1.6      | 23.6    | 0.007  |
| wu:fb09b10        | 563544  | wu:fb09b10                                                    | 1.67E-03                     | 1.20E-01                     | 21.3     | 18.8     | 20.1    | 0.007  |
| mcat              | 564111  | malonyl CoA:ACP acyltransferase (mitochondrial)               | 9.63E-02                     | 1.35E-01                     | 20.2     | 23.2     | 21.7    | 0.007  |
| wu:fc06d01        | 564921  | wu:fc06d01                                                    | 1.07E-01                     | 1.27E-01                     | 12.5     | 15.2     | 13.9    | 0.007  |
| lrrc4.1           | 565021  | leucine rich repeat containing 4.1                            | 1.24E-01                     | 9.95E-02                     | 20.4     | 19.0     | 19.7    | 0.007  |
| hsp90a.2          | 565155  | heat shock protein 90-alpha 2                                 | 1.97E-02                     | 1.14E-01                     | 4.3      | 4.3      | 4.3     | 0.007  |
| LOC565371         | 565371  | novel protein similar to Down syndrome cell adhesion mc       | 1.22E-01                     | 1.86E-02                     | 15.0     | 16.3     | 15.7    | 0.007  |
| si:dkey-30j22.5   | 565465  | si:dkey-30j22.5                                               | 1.34E-01                     | 3.64E-02                     | 6.5      | 6.0      | 6.3     | 0.007  |
| LOC565707         | 565707  | hypothetical LOC565707                                        | 2.07E-02                     | 1.09E-01                     | 15.3     | 17.7     | 16.5    | 0.007  |

**Table S1: Zebrafish circadian oscillating genes**

| Gene Symbol      | Gene ID | Gene Description                                          | Fisher's g test p value (LD) | Fisher's g test p value (DD) | LD Phase | DD Phase | Phase * | FDR ** |
|------------------|---------|-----------------------------------------------------------|------------------------------|------------------------------|----------|----------|---------|--------|
| zgc:123280       | 565964  | zgc:123280                                                | 2.93E-02                     | 1.26E-01                     | 2.4      | 2.2      | 2.3     | 0.007  |
| teca             | 566085  | trans-2,3-enoyl-CoA reductase a                           | 2.27E-02                     | 1.29E-01                     | 5.8      | 7.2      | 6.5     | 0.007  |
| med12            | 566632  | mediator of RNA polymerase II transcription, subunit 12 l | 1.05E-01                     | 5.92E-02                     | 13.8     | 17.2     | 15.5    | 0.007  |
| LOC566817        | 566817  | glycine N-acyltransferase protein Keg1-like               | 1.05E-01                     | 7.16E-02                     | 2.0      | 2.3      | 2.2     | 0.007  |
| LOC566845        | 566845  | hypothetical protein LOC566845                            | 1.01E-01                     | 3.15E-03                     | 4.3      | 3.3      | 3.8     | 0.007  |
| LOC566922        | 566922  | gamma-aminobutyric acid receptor subunit beta-3-like      | 5.18E-02                     | 1.21E-01                     | 1.0      | 2.5      | 1.8     | 0.007  |
| acsl3a           | 567157  | acyl-CoA synthetase long-chain family member 3a           | 1.24E-02                     | 1.21E-01                     | 3.0      | 2.7      | 2.9     | 0.007  |
| LOC567547        | 567547  | 5,10-methylenetetrahydrofolate reductase (NADPH)-like     | 1.27E-01                     | 1.79E-02                     | 2.9      | 3.8      | 3.4     | 0.007  |
| LOC568142        | 568142  | TAK1-like protein-like                                    | 1.34E-01                     | 4.36E-02                     | 16.8     | 18.2     | 17.5    | 0.007  |
| slc44a5a         | 568158  | solute carrier family 44, member 5a                       | 3.16E-02                     | 1.01E-01                     | 17.0     | 16.3     | 16.7    | 0.007  |
| LOC568645        | 568645  | probable polypeptide N-acetylgalactosaminyltransferase    | 2.39E-02                     | 1.10E-01                     | 20.3     | 22.3     | 21.3    | 0.007  |
| cyp2ad3          | 569245  | cytochrome P450, family 2, subfamily AD, polypeptide 3    | 2.37E-03                     | 1.31E-01                     | 5.4      | 6.3      | 5.9     | 0.007  |
| si:ch211-107m4.1 | 569278  | si:ch211-107m4.1                                          | 1.27E-01                     | 3.56E-02                     | 13.3     | 11.3     | 12.3    | 0.007  |
| aadacl4          | 569798  | arylacetamide deacetylase-like 4                          | 8.44E-03                     | 1.24E-01                     | 5.2      | 4.8      | 5.0     | 0.007  |
| mrps18c          | 569841  | mitochondrial ribosomal protein S18C                      | 1.44E-01                     | 9.97E-02                     | 1.8      | 1.5      | 1.7     | 0.007  |
| alkbh5           | 570158  | alkB, alkylation repair homolog 5 (E. coli)               | 9.36E-02                     | 1.42E-01                     | 19.9     | 20.3     | 20.1    | 0.007  |
| LOC570267        | 570267  | hypothetical protein LOC570267                            | 1.30E-01                     | 1.18E-01                     | 11.9     | 2.1      | 7.0     | 0.007  |
| abcg2b           | 570453  | ATP-binding cassette, sub-family G (WHITE), member 2l     | 1.02E-01                     | 4.51E-02                     | 0.2      | 0.8      | 0.5     | 0.007  |
| uckl1            | 570547  | uridine-cytidine kinase 1-like 1                          | 1.21E-05                     | 1.20E-01                     | 3.0      | 1.7      | 2.4     | 0.007  |
| ankha            | 571148  | ankylosis, progressive homolog a                          | 1.49E-01                     | 1.47E-01                     | 3.5      | 3.0      | 3.3     | 0.007  |
| si:dkey-24l11.1  | 571287  | si:dkey-24l11.1                                           | 5.59E-03                     | 1.49E-01                     | 0.2      | 1.7      | 0.9     | 0.007  |
| kdm2aa           | 571851  | lysine (K)-specific demethylase 2Aa                       | 1.27E-02                     | 1.46E-01                     | 0.7      | 2.0      | 1.4     | 0.007  |
| zgc:112300       | 572226  | zgc:112300                                                | 3.62E-02                     | 1.25E-01                     | 11.8     | 15.0     | 13.4    | 0.007  |
| bbox1            | 572649  | butyrobetaine (gamma), 2-oxoglutarate dioxygenase 1 (c    | 1.00E-01                     | 1.40E-01                     | 5.2      | 5.3      | 5.2     | 0.007  |
| inpp1b           | 572691  | inositol polyphosphate phosphatase-like                   | 4.33E-03                     | 1.23E-01                     | 14.3     | 16.5     | 15.4    | 0.007  |
| psmb3            | 573095  | proteasome (prosome, macropain) subunit, beta type, 3     | 1.18E-01                     | 1.17E-01                     | 19.8     | 21.5     | 20.7    | 0.007  |
| zgc:122979       | 641576  | zgc:122979                                                | 6.83E-04                     | 1.17E-01                     | 1.2      | 1.7      | 1.5     | 0.007  |
| syn2b            | 641578  | synapsin IIb                                              | 1.91E-02                     | 1.30E-01                     | 0.8      | 20.3     | 22.6    | 0.007  |
| tchp             | 678595  | trichoplein, keratin filament binding                     | 2.41E-02                     | 1.39E-01                     | 12.3     | 13.5     | 12.9    | 0.007  |
| crfb12           | 678605  | cytokine receptor family member B12                       | 1.20E-01                     | 6.76E-02                     | 6.7      | 3.7      | 5.2     | 0.007  |
| zgc:136871       | 678634  | zgc:136871                                                | 1.11E-01                     | 2.73E-03                     | 1.2      | 3.3      | 2.3     | 0.007  |

**Table S1: Zebrafish circadian oscillating genes**

| Gene Symbol       | Gene ID   | Gene Description                                                      | Fisher's g test p value (LD) | Fisher's g test p value (DD) | LD Phase | DD Phase | Phase * | FDR ** |
|-------------------|-----------|-----------------------------------------------------------------------|------------------------------|------------------------------|----------|----------|---------|--------|
| mgst2             | 723997    | microsomal glutathione S-transferase 2                                | 1.43E-01                     | 1.38E-01                     | 17.7     | 18.2     | 18.0    | 0.007  |
| stra6             | 724007    | stimulated by retinoic acid gene 6 homolog (mouse)                    | 7.03E-03                     | 1.20E-01                     | 4.2      | 3.5      | 3.9     | 0.007  |
| zgc:136844        | 724012    | zgc:136844                                                            | 3.71E-03                     | 1.38E-01                     | 3.8      | 4.7      | 4.3     | 0.007  |
| si:ch211-117n7.7  | 751622    | si:ch211-117n7.7                                                      | 1.05E-01                     | 5.95E-02                     | 23.2     | 1.0      | 0.1     | 0.007  |
| exosc5            | 751632    | exosome component 5                                                   | 4.41E-02                     | 1.03E-01                     | 1.3      | 3.6      | 2.4     | 0.007  |
| zgc:152998        | 751649    | zgc:152998                                                            | 1.28E-01                     | 1.44E-01                     | 0.7      | 23.8     | 0.3     | 0.007  |
| rgs9              | 767636    | regulator of G-protein signaling 9                                    | 2.04E-03                     | 1.41E-01                     | 0.6      | 1.6      | 1.1     | 0.007  |
| zgc:153046        | 767661    | zgc:153046                                                            | 1.02E-01                     | 1.42E-01                     | 5.5      | 23.2     | 2.4     | 0.007  |
| pmt               | 767699    | phosphoethanolamine methyltransferase                                 | 6.77E-02                     | 1.49E-01                     | 18.8     | 19.8     | 19.3    | 0.007  |
| zgc:153310        | 767730    | zgc:153310                                                            | 8.62E-04                     | 1.34E-01                     | 16.2     | 17.8     | 17.0    | 0.007  |
| ptk6b             | 767734    | PTK6 protein tyrosine kinase 6b                                       | 9.91E-02                     | 1.11E-01                     | 10.9     | 11.9     | 11.4    | 0.007  |
| zgc:153943        | 768199    | zgc:153943                                                            | 6.58E-03                     | 1.47E-01                     | 14.8     | 12.8     | 13.8    | 0.007  |
| ppm1h             | 768291    | protein phosphatase, Mg <sup>2+</sup> /Mn <sup>2+</sup> dependent, 1H | 1.10E-01                     | 6.14E-02                     | 15.7     | 15.3     | 15.5    | 0.007  |
| agpat2            | 777624    | 1-acylglycerol-3-phosphate O-acyltransferase 2 (lysopho               | 1.11E-01                     | 1.42E-01                     | 4.3      | 7.5      | 5.9     | 0.007  |
| zgc:136531        | 777714    | zgc:136531                                                            | 1.60E-02                     | 1.40E-01                     | 17.3     | 16.5     | 16.9    | 0.007  |
| oaz2b             | 790945    | ornithine decarboxylase antizyme 2b                                   | 9.28E-02                     | 1.21E-01                     | 3.5      | 3.8      | 3.7     | 0.007  |
| zgc:158258        | 791186    | zgc:158258                                                            | 3.23E-03                     | 1.02E-01                     | 3.6      | 2.2      | 2.9     | 0.007  |
| blzf1             | 791432    | basic leucine zipper nuclear factor 1                                 | 2.59E-02                     | 1.50E-01                     | 14.8     | 16.8     | 15.8    | 0.007  |
| enpp6             | 791915    | ectonucleotide pyrophosphatase/phosphodiesterase 6                    | 3.19E-02                     | 1.27E-01                     | 16.2     | 16.0     | 16.1    | 0.007  |
| hspb6             | 792610    | heat shock protein, alpha-crystallin-related, b6                      | 2.47E-02                     | 1.11E-01                     | 0.8      | 1.5      | 1.2     | 0.007  |
| LOC793037         | 793037    | similar to C1q-like adipose specific protein                          | 1.18E-01                     | 8.18E-02                     | 21.8     | 0.7      | 23.3    | 0.007  |
| LOC793262         | 793262    | transmembrane protein 132D-like                                       | 1.32E-01                     | 2.01E-02                     | 14.8     | 16.0     | 15.4    | 0.007  |
| si:ch1073-126c3.3 | 793687    | si:ch1073-126c3.3                                                     | 1.49E-01                     | 2.16E-02                     | 16.7     | 19.0     | 17.9    | 0.007  |
| LOC796407         | 796407    | RIP140-A                                                              | 1.39E-01                     | 5.43E-02                     | 13.0     | 14.3     | 13.6    | 0.007  |
| si:dkey-242k1.6   | 797143    | si:dkey-242k1.6                                                       | 7.50E-02                     | 1.34E-01                     | 14.0     | 14.5     | 14.3    | 0.007  |
| abcb11a           | 797269    | ATP-binding cassette, sub-family B (MDR/TAP), member                  | 5.26E-03                     | 1.15E-01                     | 20.3     | 23.2     | 21.8    | 0.007  |
| LOC797982         | 797982    | disabled homolog 2-like                                               | 2.27E-03                     | 1.32E-01                     | 14.5     | 16.2     | 15.4    | 0.007  |
| cdx4              | 798281    | caudal type homeo box transcription factor 4                          | 1.17E-02                     | 1.11E-01                     | 19.8     | 21.5     | 20.7    | 0.007  |
| spata17           | 799739    | spermatogenesis-associated 17                                         | 1.25E-01                     | 1.38E-01                     | 16.8     | 20.0     | 18.4    | 0.007  |
| wu:fb66f03        | 100000085 | wu:fb66f03                                                            | 5.97E-02                     | 1.01E-01                     | 16.2     | 17.3     | 16.8    | 0.007  |
| ltn1              | 100000122 | listerin E3 ubiquitin protein ligase 1                                | 1.45E-01                     | 4.51E-02                     | 21.7     | 22.7     | 22.2    | 0.007  |

**Table S1: Zebrafish circadian oscillating genes**

| Gene Symbol  | Gene ID   | Gene Description                                                     | Fisher's g test p value (LD) | Fisher's g test p value (DD) | LD Phase | DD Phase | Phase * | FDR ** |
|--------------|-----------|----------------------------------------------------------------------|------------------------------|------------------------------|----------|----------|---------|--------|
| parp6b       | 100002364 | poly (ADP-ribose) polymerase family, member 6b                       | 1.18E-01                     | 2.45E-02                     | 12.3     | 14.7     | 13.5    | 0.007  |
| tcirg1       | 100003139 | T-cell, immune regulator 1, ATPase, H <sup>+</sup> transporting, lys | 1.27E-02                     | 1.06E-01                     | 14.2     | 15.2     | 14.7    | 0.007  |
| dis3         | 100003553 | DIS3 mitotic control homolog (S. cerevisiae)                         | 1.11E-01                     | 3.41E-03                     | 0.2      | 3.0      | 1.6     | 0.007  |
| wu:fb51a10   | 100004396 | wu:fb51a10                                                           | 9.19E-02                     | 1.02E-01                     | 22.8     | 21.0     | 21.9    | 0.007  |
| sh3gl1a      | 100005753 | SH3-domain GRB2-like 1a                                              | 9.27E-03                     | 1.18E-01                     | 8.3      | 9.2      | 8.8     | 0.007  |
| zgc:173619   | 100006880 | zgc:173619                                                           | 8.82E-02                     | 1.34E-01                     | 7.8      | 7.2      | 7.5     | 0.007  |
| paqr5b       | 100007661 | progesterin and adipoQ receptor family member Vb                     | 1.48E-01                     | 1.46E-02                     | 2.5      | 4.2      | 3.4     | 0.007  |
| LOC100007990 | 100007990 | solute carrier family 7 (cationic amino acid transporter, y-         | 1.70E-02                     | 1.01E-01                     | 14.7     | 16.8     | 15.8    | 0.007  |
| hbl3         | 100008009 | hexose-binding lectin 3                                              | 1.11E-01                     | 7.40E-02                     | 3.0      | 3.5      | 3.3     | 0.007  |
| zgc:158677   | 100009626 | zgc:158677                                                           | 7.49E-03                     | 1.31E-01                     | 0.5      | 0.3      | 0.4     | 0.007  |
| zgc:158846   | 100009654 | zgc:158846                                                           | 1.30E-02                     | 1.20E-01                     | 14.7     | 15.3     | 15.0    | 0.007  |
| zgc:162228   | 100037363 | zgc:162228                                                           | 5.94E-03                     | 1.12E-01                     | 12.8     | 13.0     | 12.9    | 0.007  |
| f2rl1.2      | 100073342 | coagulation factor II (thrombin) receptor-like 1.2                   | 1.20E-01                     | 3.73E-02                     | 10.8     | 16.5     | 13.7    | 0.007  |
| ifnphi3      | 100126803 | interferon phi 3                                                     | 1.05E-01                     | 1.46E-01                     | 10.2     | 9.7      | 10.0    | 0.007  |
| gb:cn833218  | 100190888 | expressed sequence CN833218                                          | 4.30E-02                     | 1.02E-01                     | 2.3      | 2.3      | 2.3     | 0.007  |
| csf3         | 100190920 | CSF3 protein                                                         | 9.49E-03                     | 1.10E-01                     | 22.3     | 23.2     | 22.8    | 0.007  |
| wdr89        | 100272000 | WD repeat domain 89                                                  | 1.03E-01                     | 1.23E-01                     | 23.2     | 1.3      | 0.3     | 0.007  |
| LOC100329277 | 100329277 | hypothetical protein LOC100329277                                    | 5.69E-03                     | 1.35E-01                     | 0.2      | 1.3      | 0.8     | 0.007  |
| LOC100330109 | 100330109 | growth arrest-specific protein 1-like                                | 1.11E-01                     | 5.32E-02                     | 14.5     | 16.3     | 15.4    | 0.007  |
| LOC100330227 | 100330227 | SH2 domain containing 4A-like                                        | 1.05E-01                     | 1.11E-01                     | 12.7     | 17.3     | 15.0    | 0.007  |
| LOC100330448 | 100330448 | twinkle protein, mitochondrial-like                                  | 3.51E-03                     | 1.02E-01                     | 0.5      | 2.5      | 1.5     | 0.007  |
| LOC100331554 | 100331554 | sugar phosphate exchanger 3-like                                     | 3.96E-02                     | 1.35E-01                     | 18.5     | 20.3     | 19.4    | 0.007  |
| exog         | 100331954 | nuclease EXOG, mitochondrial-like                                    | 5.46E-02                     | 1.07E-01                     | 1.8      | 3.2      | 2.5     | 0.007  |
| LOC100332380 | 100332380 | LAG1 longevity assurance homolog 2-like                              | 1.08E-02                     | 1.04E-01                     | 14.8     | 16.2     | 15.5    | 0.007  |
| LOC100333973 | 100333973 | CUGBP Elav-like family member 3-like                                 | 3.15E-02                     | 1.36E-01                     | 17.0     | 16.8     | 16.9    | 0.007  |
| skia         | 30101     | nuclear oncoprotein skia                                             | 1.67E-01                     | 1.32E-01                     | 18.5     | 15.5     | 17.0    | 0.012  |
| foxd5        | 30524     | forkhead box D5                                                      | 1.91E-01                     | 2.77E-02                     | 12.3     | 16.5     | 14.4    | 0.012  |
| pax6a        | 30567     | paired box gene 6a                                                   | 1.32E-01                     | 1.57E-01                     | 15.3     | 15.7     | 15.5    | 0.012  |
| npy4r        | 30717     | neuropeptide Y receptor Y4                                           | 1.48E-01                     | 1.63E-01                     | 16.2     | 13.7     | 15.0    | 0.012  |
| gbp          | 30719     | glycogen synthase kinase binding protein                             | 5.09E-02                     | 1.88E-01                     | 1.7      | 2.5      | 2.1     | 0.012  |
| gch2         | 64263     | GTP cyclohydrolase 2                                                 | 1.71E-01                     | 4.60E-02                     | 2.8      | 5.0      | 3.9     | 0.012  |

**Table S1: Zebrafish circadian oscillating genes**

| Gene Symbol | Gene ID | Gene Description                                                          | Fisher's g test p value (LD) | Fisher's g test p value (DD) | LD Phase | DD Phase | Phase * | FDR ** |
|-------------|---------|---------------------------------------------------------------------------|------------------------------|------------------------------|----------|----------|---------|--------|
| atp1a1      | 64612   | ATPase, Na <sup>+</sup> /K <sup>+</sup> transporting, alpha 1 polypeptide | 7.19E-03                     | 1.82E-01                     | 1.7      | 2.2      | 2.0     | 0.012  |
| ctsd        | 65225   | cathepsin D                                                               | 1.59E-01                     | 1.34E-01                     | 15.5     | 17.0     | 16.3    | 0.012  |
| cldnc       | 81582   | claudin c                                                                 | 9.89E-02                     | 1.66E-01                     | 12.8     | 15.3     | 14.1    | 0.012  |
| clica       | 84040   | chloride intracellular channel a                                          | 3.37E-02                     | 1.62E-01                     | 3.7      | 5.8      | 4.8     | 0.012  |
| vars        | 114427  | valyl-tRNA synthetase                                                     | 1.63E-02                     | 1.73E-01                     | 23.3     | 0.3      | 23.8    | 0.012  |
| zp2.2       | 114438  | zona pellucida glycoprotein 2.2                                           | 1.88E-01                     | 4.38E-02                     | 2.3      | 2.2      | 2.3     | 0.012  |
| ncam1b      | 114442  | neural cell adhesion molecule 1b                                          | 2.12E-03                     | 1.52E-01                     | 2.5      | 1.8      | 2.2     | 0.012  |
| atp1b2b     | 114457  | ATPase, Na <sup>+</sup> /K <sup>+</sup> transporting, beta 2b polypeptide | 1.52E-02                     | 1.80E-01                     | 1.0      | 1.1      | 1.1     | 0.012  |
| rab2a       | 140617  | RAB2A, member RAS oncogene family                                         | 2.00E-01                     | 1.03E-01                     | 19.3     | 0.3      | 21.8    | 0.012  |
| cyp1a       | 140634  | cytochrome P450, family 1, subfamily A                                    | 9.93E-02                     | 1.94E-01                     | 22.7     | 0.8      | 23.8    | 0.012  |
| psap        | 140811  | prosaposin                                                                | 3.32E-02                     | 1.60E-01                     | 16.4     | 18.1     | 17.2    | 0.012  |
| ptprf       | 140819  | protein tyrosine phosphatase, receptor type, F                            | 1.83E-01                     | 1.27E-01                     | 17.1     | 17.1     | 17.1    | 0.012  |
| mcm3        | 192323  | MCM3 minichromosome maintenance deficient 3 (S. ceru                      | 1.60E-01                     | 1.95E-01                     | 2.7      | 4.2      | 3.5     | 0.012  |
| gpia        | 246094  | glucose phosphate isomerase a                                             | 1.88E-01                     | 2.10E-02                     | 5.5      | 5.5      | 5.5     | 0.012  |
| ptgs1       | 246226  | prostaglandin-endoperoxide synthase 1                                     | 1.73E-01                     | 1.17E-01                     | 8.7      | 8.2      | 8.5     | 0.012  |
| quo         | 321031  | quattro                                                                   | 1.52E-03                     | 2.00E-01                     | 14.0     | 15.7     | 14.9    | 0.012  |
| bmi1        | 321505  | B lymphoma Mo-MLV insertion region 1                                      | 2.21E-03                     | 1.55E-01                     | 16.4     | 17.3     | 16.8    | 0.012  |
| exoc1       | 322338  | exocyst complex component 1                                               | 9.53E-02                     | 1.54E-01                     | 13.5     | 14.0     | 13.8    | 0.012  |
| hsd17b12b   | 322626  | hydroxysteroid (17-beta) dehydrogenase 12b                                | 8.91E-02                     | 1.99E-01                     | 1.7      | 2.0      | 1.9     | 0.012  |
| dnajc5ga    | 322863  | DnaJ (Hsp40) homolog, subfamily C, member 5 gamma                         | 1.12E-01                     | 1.71E-01                     | 11.6     | 11.2     | 11.4    | 0.012  |
| zbtb16a     | 323269  | zinc finger and BTB domain containing 16a                                 | 1.92E-01                     | 1.86E-01                     | 16.2     | 14.3     | 15.3    | 0.012  |
| dnaja1l     | 323922  | DnaJ (Hsp40) homolog, subfamily A, member 1, like                         | 1.94E-01                     | 5.15E-02                     | 4.8      | 5.0      | 4.9     | 0.012  |
| tnika       | 325042  | TRAF2 and NCK interacting kinase a                                        | 1.66E-02                     | 1.75E-01                     | 14.2     | 13.8     | 14.0    | 0.012  |
| sap30l      | 327079  | sap30-like                                                                | 1.91E-02                     | 1.97E-01                     | 21.2     | 21.5     | 21.4    | 0.012  |
| fam46c      | 327154  | family with sequence similarity 46, member C                              | 4.83E-02                     | 1.55E-01                     | 11.6     | 1.5      | 6.6     | 0.012  |
| pcmt1       | 327176  | protein-L-isoaspartate (D-aspartate) O-methyltransferase                  | 1.83E-01                     | 8.77E-02                     | 13.5     | 15.3     | 14.4    | 0.012  |
| zgc:66160   | 327299  | zgc:66160                                                                 | 4.83E-02                     | 1.81E-01                     | 15.0     | 16.8     | 15.9    | 0.012  |
| usp42       | 327528  | ubiquitin specific peptidase 42                                           | 1.24E-02                     | 1.81E-01                     | 18.6     | 19.2     | 18.9    | 0.012  |
| zfp36l2     | 333941  | zinc finger protein 36, C3H type-like 2                                   | 9.28E-03                     | 1.90E-01                     | 6.7      | 9.2      | 8.0     | 0.012  |
| xpo6        | 333980  | exportin 6                                                                | 1.83E-01                     | 1.89E-01                     | 19.3     | 19.3     | 19.3    | 0.012  |
| c20orf24    | 334006  | c20orf24 homolog (H. sapiens)                                             | 1.91E-01                     | 2.69E-02                     | 12.4     | 2.5      | 7.5     | 0.012  |



**Table S1: Zebrafish circadian oscillating genes**

| Gene Symbol     | Gene ID | Gene Description                                             | Fisher's g test p value (LD) | Fisher's g test p value (DD) | LD Phase | DD Phase | Phase * | FDR ** |
|-----------------|---------|--------------------------------------------------------------|------------------------------|------------------------------|----------|----------|---------|--------|
| plk3            | 334202  | polo-like kinase 3 (Drosophila)                              | 4.48E-02                     | 1.63E-01                     | 6.3      | 3.0      | 4.7     | 0.012  |
| clca1           | 334289  | chloride channel accessory 1                                 | 5.47E-02                     | 1.98E-01                     | 17.1     | 17.3     | 17.2    | 0.012  |
| wu:fa04e07      | 334823  | wu:fa04e07                                                   | 1.57E-01                     | 1.29E-01                     | 23.3     | 1.3      | 0.3     | 0.012  |
| serpinb114      | 335229  | serpin peptidase inhibitor, clade B (ovalbumin), member      | 3.03E-02                     | 1.91E-01                     | 0.5      | 2.3      | 1.4     | 0.012  |
| rbp4l           | 335651  | retinol binding protein 4, like                              | 1.88E-01                     | 7.27E-02                     | 4.5      | 23.8     | 2.2     | 0.012  |
| itm2cb          | 335863  | integral membrane protein 2Cb                                | 7.96E-03                     | 1.61E-01                     | 0.2      | 2.0      | 1.1     | 0.012  |
| ppdpfb          | 336303  | pancreatic progenitor cell differentiation and proliferation | 1.41E-01                     | 1.78E-01                     | 13.2     | 15.0     | 14.1    | 0.012  |
| glulb           | 336473  | glutamate-ammonia ligase (glutamine synthase) b              | 1.94E-01                     | 1.12E-01                     | 6.8      | 5.8      | 6.3     | 0.012  |
| psmc1a          | 336786  | proteasome (prosome, macropain) 26S subunit, ATPase          | 8.16E-02                     | 1.81E-01                     | 18.7     | 20.3     | 19.5    | 0.012  |
| zgc:56419       | 336797  | zgc:56419                                                    | 6.56E-02                     | 1.85E-01                     | 0.4      | 2.0      | 1.2     | 0.012  |
| si:dkey-11e23.5 | 336888  | si:dkey-11e23.5                                              | 1.32E-02                     | 1.68E-01                     | 0.8      | 1.0      | 0.9     | 0.012  |
| stat6           | 337413  | signal transducer and activator of transcription 6, interleu | 1.50E-01                     | 1.20E-01                     | 12.5     | 12.3     | 12.4    | 0.012  |
| mcm4            | 337598  | MCM4 minichromosome maintenance deficient 4, mitotir         | 9.59E-02                     | 1.91E-01                     | 2.5      | 4.2      | 3.4     | 0.012  |
| impdh1b         | 338306  | inosine 5'-phosphate dehydrogenase 1b                        | 9.77E-02                     | 1.96E-01                     | 14.6     | 15.7     | 15.2    | 0.012  |
| gmn             | 368320  | geminin, DNA replication inhibitor                           | 8.89E-02                     | 1.78E-01                     | 4.0      | 5.3      | 4.7     | 0.012  |
| pkp3            | 368397  | plakophilin 3                                                | 9.37E-02                     | 1.59E-01                     | 3.5      | 5.5      | 4.5     | 0.012  |
| pr2y4l          | 368435  | pyrimidinergic receptor P2Y, G-protein coupled, 4-like       | 1.73E-01                     | 9.68E-02                     | 14.0     | 16.2     | 15.1    | 0.012  |
| pa2g4a          | 368737  | proliferation-associated 2G4, a                              | 1.61E-01                     | 1.34E-02                     | 0.2      | 3.3      | 1.8     | 0.012  |
| hig1            | 373084  | hypoxia induced gene 1                                       | 1.91E-03                     | 1.86E-01                     | 2.7      | 1.8      | 2.3     | 0.012  |
| p4ha2           | 373132  | procollagen-proline, 2-oxoglutarate 4-dioxygenase (prolir    | 8.24E-02                     | 1.92E-01                     | 2.0      | 1.1      | 1.6     | 0.012  |
| mmp14a          | 373882  | matrix metalloproteinase 14a (membrane-inserted)             | 1.63E-01                     | 1.65E-01                     | 16.8     | 18.5     | 17.7    | 0.012  |
| tkt             | 378713  | transketolase                                                | 8.95E-02                     | 1.54E-01                     | 1.8      | 3.7      | 2.8     | 0.012  |
| rab32a          | 378969  | RAB32a, member RAS oncogene family                           | 7.53E-02                     | 1.93E-01                     | 13.1     | 15.9     | 14.5    | 0.012  |
| ldlr            | 387529  | low density lipoprotein receptor                             | 1.82E-01                     | 1.02E-01                     | 17.0     | 18.0     | 17.5    | 0.012  |
| dcaf13          | 393097  | ddb1 and cul4 associated factor 13                           | 1.58E-01                     | 3.37E-02                     | 23.4     | 1.9      | 0.6     | 0.012  |
| ccb12           | 393315  | cysteine conjugate-beta lyase 2                              | 5.31E-02                     | 1.62E-01                     | 5.5      | 5.5      | 5.5     | 0.012  |
| coro6           | 393367  | coronin 6                                                    | 1.63E-01                     | 3.12E-02                     | 20.8     | 23.2     | 22.0    | 0.012  |
| zgc:63466       | 393404  | zgc:63466                                                    | 1.96E-01                     | 1.96E-01                     | 13.7     | 16.7     | 15.2    | 0.012  |
| agxt2l1         | 393421  | alanine-glyoxylate aminotransferase 2-like 1                 | 1.54E-01                     | 5.28E-03                     | 4.2      | 4.5      | 4.4     | 0.012  |
| ptpn11b         | 393426  | protein tyrosine phosphatase, non-receptor type 11, b        | 4.54E-02                     | 1.68E-01                     | 3.5      | 2.9      | 3.2     | 0.012  |
| ube3c           | 393445  | ubiquitin protein ligase E3C                                 | 5.34E-02                     | 1.68E-01                     | 13.0     | 17.0     | 15.0    | 0.012  |

**Table S1: Zebrafish circadian oscillating genes**

| Gene Symbol | Gene ID | Gene Description                                         | Fisher's g test p value (LD) | Fisher's g test p value (DD) | LD Phase | DD Phase | Phase * | FDR ** |
|-------------|---------|----------------------------------------------------------|------------------------------|------------------------------|----------|----------|---------|--------|
| slc35d1b    | 393447  | solute carrier family 35 (UDP-glucuronic acid/UDP-N-ace  | 1.80E-01                     | 1.18E-01                     | 0.4      | 3.1      | 1.7     | 0.012  |
| zgc:66455   | 393502  | zgc:66455                                                | 1.56E-01                     | 1.40E-01                     | 22.8     | 22.3     | 22.6    | 0.012  |
| zgc:65873   | 393514  | zgc:65873                                                | 4.91E-02                     | 1.83E-01                     | 16.5     | 17.2     | 16.9    | 0.012  |
| polr1c      | 393538  | polymerase (RNA) I polypeptide C                         | 1.74E-01                     | 8.23E-02                     | 23.7     | 1.7      | 0.7     | 0.012  |
| zgc:63840   | 393599  | zgc:63840                                                | 1.47E-01                     | 1.95E-01                     | 17.2     | 17.7     | 17.5    | 0.012  |
| thyn1       | 393630  | thymocyte nuclear protein 1                              | 1.66E-01                     | 1.91E-01                     | 0.5      | 2.8      | 1.6     | 0.012  |
| tbc1d7      | 393750  | TBC1 domain family, member 7                             | 1.09E-01                     | 1.93E-01                     | 15.2     | 17.2     | 16.2    | 0.012  |
| rprmb       | 393779  | reprimo, TP53 dependent G2 arrest mediator candidate I   | 1.78E-01                     | 1.74E-01                     | 20.3     | 0.2      | 22.3    | 0.012  |
| pde6c       | 393845  | phosphodiesterase 6C, cGMP-specific, cone, alpha prim    | 5.83E-02                     | 1.84E-01                     | 0.4      | 2.2      | 1.3     | 0.012  |
| zgc:77739   | 393870  | zgc:77739                                                | 1.54E-01                     | 1.09E-02                     | 5.0      | 6.0      | 5.5     | 0.012  |
| kcmf1       | 393927  | potassium channel modulatory factor 1                    | 1.80E-01                     | 1.77E-01                     | 16.5     | 20.2     | 18.4    | 0.012  |
| cdc34a      | 393933  | cell division cycle 34 homolog (S. cerevisiae) a         | 7.69E-02                     | 1.60E-01                     | 15.4     | 18.1     | 16.7    | 0.012  |
| psmc2       | 393941  | proteasome (prosome, macropain) 26S subunit, ATPase      | 1.94E-01                     | 5.80E-03                     | 17.0     | 19.2     | 18.1    | 0.012  |
| ankrd10a    | 393955  | ankyrin repeat domain 10a                                | 1.98E-01                     | 1.80E-01                     | 12.5     | 11.5     | 12.0    | 0.012  |
| zgc:56548   | 393989  | zgc:56548                                                | 1.68E-01                     | 1.71E-01                     | 16.8     | 17.2     | 17.0    | 0.012  |
| shmt1       | 394021  | serine hydroxymethyltransferase 1 (soluble)              | 1.78E-02                     | 1.69E-01                     | 4.8      | 5.7      | 5.2     | 0.012  |
| epx1        | 394043  | epoxide hydrolase 1, microsomal (xenobiotic)             | 2.53E-02                     | 1.69E-01                     | 6.8      | 7.0      | 6.9     | 0.012  |
| snpc3       | 394090  | small nuclear RNA activating complex, polypeptide 3      | 1.67E-01                     | 2.83E-02                     | 23.7     | 1.7      | 0.7     | 0.012  |
| chic2       | 394095  | cysteine-rich hydrophobic domain 2                       | 1.18E-02                     | 1.53E-01                     | 14.8     | 16.2     | 15.5    | 0.012  |
| dctn2       | 394141  | dynactin 2 (p50)                                         | 1.13E-01                     | 1.86E-01                     | 16.3     | 17.6     | 16.9    | 0.012  |
| grina       | 394183  | glutamate receptor, ionotropic, N-methyl D-aspartate-ass | 3.16E-03                     | 1.63E-01                     | 14.7     | 15.5     | 15.1    | 0.012  |
| mmadhc      | 402886  | methylmalonic aciduria (cobalamin deficiency) cblD type, | 6.52E-02                     | 1.73E-01                     | 6.0      | 4.2      | 5.1     | 0.012  |
| bcor        | 402921  | BCL6 co-repressor                                        | 1.85E-01                     | 7.37E-02                     | 18.2     | 19.0     | 18.6    | 0.012  |
| txn2        | 402938  | thioredoxin 2                                            | 7.71E-02                     | 1.67E-01                     | 3.2      | 3.0      | 3.1     | 0.012  |
| ppapdc3     | 402958  | phosphatidic acid phosphatase type 2 domain containing   | 9.37E-03                     | 1.63E-01                     | 14.8     | 16.3     | 15.6    | 0.012  |
| ppa2        | 402961  | pyrophosphatase (inorganic) 2                            | 1.16E-01                     | 1.55E-01                     | 5.5      | 0.3      | 2.9     | 0.012  |
| zgc:77197   | 404607  | zgc:77197                                                | 3.22E-02                     | 1.98E-01                     | 17.7     | 18.4     | 18.0    | 0.012  |
| fam49bb     | 404610  | family with sequence similarity 49, member Bb            | 1.82E-01                     | 9.26E-02                     | 4.7      | 4.0      | 4.4     | 0.012  |
| hoga1       | 405806  | 4-hydroxy-2-oxoglutarate aldolase 1                      | 6.91E-02                     | 1.53E-01                     | 23.0     | 23.5     | 23.3    | 0.012  |
| msrb2       | 405857  | methionine sulfoxide reductase B2                        | 1.11E-01                     | 1.90E-01                     | 15.7     | 14.0     | 14.9    | 0.012  |
| nrp2a       | 405901  | neuropilin 2a                                            | 5.19E-04                     | 1.57E-01                     | 18.7     | 17.3     | 18.0    | 0.012  |

**Table S1: Zebrafish circadian oscillating genes**

| Gene Symbol | Gene ID | Gene Description                                            | Fisher's g test p value (LD) | Fisher's g test p value (DD) | LD Phase | DD Phase | Phase * | FDR ** |
|-------------|---------|-------------------------------------------------------------|------------------------------|------------------------------|----------|----------|---------|--------|
| hlxb9la     | 406205  | homeo box HB9 like a                                        | 1.92E-01                     | 2.99E-02                     | 1.2      | 3.0      | 2.1     | 0.012  |
| grb2        | 406308  | growth factor receptor-bound protein 2                      | 1.34E-01                     | 1.74E-01                     | 3.0      | 22.8     | 0.9     | 0.012  |
| wdr24       | 406336  | WD repeat domain 24                                         | 1.51E-01                     | 1.28E-01                     | 11.0     | 14.0     | 12.5    | 0.012  |
| nipa2       | 406399  | non imprinted in Prader-Willi/Angelman syndrome 2 (hun      | 2.64E-02                     | 1.77E-01                     | 1.2      | 2.2      | 1.7     | 0.012  |
| marcksl1    | 406407  | MARCKS-like 1                                               | 1.68E-01                     | 9.41E-02                     | 14.7     | 13.7     | 14.2    | 0.012  |
| cyb5a       | 406409  | cytochrome b5 type A (microsomal)                           | 1.94E-01                     | 4.87E-02                     | 2.7      | 4.2      | 3.4     | 0.012  |
| ptges3a     | 406449  | prostaglandin E synthase 3a (cytosolic)                     | 1.96E-01                     | 1.87E-01                     | 3.0      | 4.5      | 3.8     | 0.012  |
| gdpd3       | 406482  | glycerophosphodiester phosphodiesterase domain conta        | 2.64E-02                     | 1.92E-01                     | 5.3      | 6.2      | 5.8     | 0.012  |
| rnft1       | 406509  | ring finger protein, transmembrane 1                        | 1.04E-01                     | 1.60E-01                     | 12.7     | 14.0     | 13.4    | 0.012  |
| cbwd        | 406536  | COBW domain containing                                      | 1.68E-01                     | 5.75E-02                     | 0.5      | 3.5      | 2.0     | 0.012  |
| ppt1        | 406648  | palmitoyl-protein thioesterase 1 (ceroid-lipofuscinosis, ne | 1.38E-01                     | 2.00E-01                     | 14.0     | 18.3     | 16.2    | 0.012  |
| got2a       | 406688  | glutamic-oxaloacetic transaminase 2a, mitochondrial (asl    | 1.64E-01                     | 1.37E-01                     | 6.8      | 7.3      | 7.0     | 0.012  |
| pgd         | 406762  | phosphogluconate hydrogenase                                | 3.66E-02                     | 1.85E-01                     | 3.3      | 3.3      | 3.3     | 0.012  |
| cul1b       | 406816  | cullin 1b                                                   | 1.10E-01                     | 1.56E-01                     | 14.3     | 16.7     | 15.5    | 0.012  |
| ift81       | 432390  | intraflagellar transport 81 homolog                         | 4.48E-02                     | 1.54E-01                     | 13.8     | 11.9     | 12.9    | 0.012  |
| trmt61a     | 436593  | tRNA methyltransferase 61 homolog A (S. cerevisiae)         | 1.44E-01                     | 1.91E-01                     | 11.5     | 12.8     | 12.1    | 0.012  |
| bpnt1       | 436627  | bisphosphate nucleotidase 1                                 | 1.67E-01                     | 7.53E-02                     | 3.0      | 5.2      | 4.1     | 0.012  |
| zgc:92655   | 436701  | zgc:92655                                                   | 7.12E-04                     | 1.89E-01                     | 0.8      | 1.9      | 1.3     | 0.012  |
| fam189a1    | 436705  | family with sequence similarity 189, member A1              | 1.79E-01                     | 1.70E-01                     | 17.3     | 18.8     | 18.1    | 0.012  |
| timt13      | 436738  | translocase of inner mitochondrial membrane 13 homolo       | 3.98E-02                     | 1.75E-01                     | 0.6      | 2.6      | 1.6     | 0.012  |
| hccsa       | 436771  | holocytochrome c synthetase a                               | 1.04E-01                     | 1.55E-01                     | 4.5      | 1.0      | 2.8     | 0.012  |
| mrpl46      | 436791  | mitochondrial ribosomal protein L46                         | 4.94E-02                     | 1.89E-01                     | 0.0      | 1.8      | 0.9     | 0.012  |
| zgc:92912   | 436805  | zgc:92912                                                   | 1.96E-01                     | 1.63E-01                     | 16.3     | 13.3     | 14.8    | 0.012  |
| mrpl11      | 436829  | mitochondrial ribosomal protein L11                         | 4.45E-03                     | 1.93E-01                     | 1.3      | 2.2      | 1.8     | 0.012  |
| pdlim5      | 436927  | PDZ and LIM domain 5                                        | 1.68E-01                     | 1.60E-01                     | 10.5     | 7.7      | 9.1     | 0.012  |
| ttc33       | 436995  | tetratricopeptide repeat domain 33                          | 1.02E-01                     | 1.97E-01                     | 13.0     | 15.7     | 14.4    | 0.012  |
| zdhhc3      | 436998  | zinc finger, DHHC-type containing 3                         | 1.85E-01                     | 9.23E-03                     | 5.0      | 3.8      | 4.4     | 0.012  |
| b4galt7     | 445022  | xylosylprotein beta 1,4-galactosyltransferase, polypeptid   | 1.63E-01                     | 8.58E-02                     | 0.2      | 22.3     | 23.3    | 0.012  |
| olfm1b      | 445092  | olfactomedin 1b                                             | 7.51E-02                     | 1.71E-01                     | 16.8     | 15.7     | 16.3    | 0.012  |
| zgc:101116  | 445165  | zgc:101116                                                  | 2.93E-03                     | 1.82E-01                     | 18.3     | 19.5     | 18.9    | 0.012  |
| jagn1b      | 445190  | jagunal homolog 1b (Drosophila)                             | 1.85E-01                     | 3.46E-03                     | 23.7     | 2.2      | 1.0     | 0.012  |

**Table S1: Zebrafish circadian oscillating genes**

| Gene Symbol     | Gene ID | Gene Description                                            | Fisher's g test p value (LD) | Fisher's g test p value (DD) | LD Phase | DD Phase | Phase * | FDR ** |
|-----------------|---------|-------------------------------------------------------------|------------------------------|------------------------------|----------|----------|---------|--------|
| ifrd2           | 445227  | interferon-related developmental regulator 2                | 1.99E-01                     | 1.60E-01                     | 21.3     | 11.9     | 16.6    | 0.012  |
| picalml         | 445286  | phosphatidylinositol binding clathrin assembly protein, lik | 1.77E-01                     | 6.78E-02                     | 18.5     | 17.7     | 18.1    | 0.012  |
| tcf25           | 445817  | transcription factor 25 (basic helix-loop-helix)            | 1.99E-01                     | 1.81E-01                     | 22.5     | 1.7      | 0.1     | 0.012  |
| zgc:92316       | 447840  | zgc:92316                                                   | 1.32E-02                     | 1.64E-01                     | 4.7      | 3.2      | 4.0     | 0.012  |
| zgc:101783      | 447883  | zgc:101783                                                  | 3.67E-02                     | 1.96E-01                     | 12.8     | 16.7     | 14.8    | 0.012  |
| zgc:101565      | 447903  | zgc:101565                                                  | 1.38E-02                     | 1.57E-01                     | 0.3      | 1.3      | 0.8     | 0.012  |
| gpsm2l          | 449665  | G-protein signalling modulator 2, like                      | 9.05E-02                     | 1.93E-01                     | 15.3     | 17.3     | 16.3    | 0.012  |
| hspb7           | 450019  | heat shock protein family, alpha-crystallin-related, b7     | 1.57E-01                     | 1.22E-01                     | 4.3      | 2.5      | 3.4     | 0.012  |
| tspan5          | 450026  | tetraspanin 5                                               | 1.70E-01                     | 7.96E-02                     | 15.2     | 16.5     | 15.9    | 0.012  |
| phyhd1          | 492804  | phytanoyl-CoA dioxygenase domain containing 1               | 3.24E-02                     | 1.86E-01                     | 5.8      | 7.0      | 6.4     | 0.012  |
| slc43a2b        | 494042  | solute carrier family 43, member 2b                         | 5.88E-02                     | 1.51E-01                     | 2.7      | 3.8      | 3.3     | 0.012  |
| tectb           | 494051  | tectorin beta                                               | 1.15E-01                     | 1.83E-01                     | 3.2      | 3.9      | 3.5     | 0.012  |
| ephx2           | 494099  | epoxide hydrolase 2, cytoplasmic                            | 7.73E-03                     | 1.95E-01                     | 6.2      | 4.2      | 5.2     | 0.012  |
| si:dkey-13a21.4 | 494576  | si:dkey-13a21.4                                             | 1.75E-01                     | 1.49E-01                     | 14.2     | 16.2     | 15.2    | 0.012  |
| im:7137379      | 497345  | im:7137379                                                  | 1.51E-01                     | 1.66E-01                     | 4.5      | 7.5      | 6.0     | 0.012  |
| ndufaf1         | 503714  | NADH dehydrogenase (ubiquinone) 1 alpha subcomplex          | 1.65E-01                     | 1.73E-01                     | 0.8      | 1.5      | 1.2     | 0.012  |
| wars2           | 503745  | tryptophanyl tRNA synthetase 2, mitochondrial               | 7.08E-04                     | 1.95E-01                     | 1.0      | 3.5      | 2.3     | 0.012  |
| zgc:112964      | 503764  | zgc:112964                                                  | 1.79E-03                     | 1.82E-01                     | 13.2     | 14.8     | 14.0    | 0.012  |
| ak5l            | 548336  | adenylate kinase 5, like                                    | 1.83E-01                     | 1.69E-01                     | 13.7     | 15.2     | 14.5    | 0.012  |
| ubb             | 550134  | ubiquitin B                                                 | 1.51E-01                     | 4.91E-02                     | 12.7     | 15.0     | 13.9    | 0.012  |
| kctd12b         | 550324  | potassium channel tetramerisation domain containing 12      | 6.45E-02                     | 1.91E-01                     | 10.2     | 12.0     | 11.1    | 0.012  |
| ap1s3a          | 550415  | adaptor-related protein complex 1, sigma 3 subunit, a       | 4.48E-02                     | 1.79E-01                     | 0.2      | 3.4      | 1.8     | 0.012  |
| arl4ca          | 550444  | ADP-ribosylation factor-like 4Ca                            | 5.89E-02                     | 1.83E-01                     | 14.7     | 14.4     | 14.5    | 0.012  |
| spata6          | 550512  | spermatogenesis associated 6                                | 1.62E-01                     | 1.82E-01                     | 10.7     | 14.7     | 12.7    | 0.012  |
| stmn1b          | 550548  | stathmin 1b                                                 | 7.74E-02                     | 1.57E-01                     | 6.3      | 6.2      | 6.3     | 0.012  |
| pdlim1          | 550568  | PDZ and LIM domain 1 (elfin)                                | 1.52E-04                     | 1.94E-01                     | 7.5      | 5.8      | 6.7     | 0.012  |
| im:6901974      | 552974  | im:6901974                                                  | 1.65E-01                     | 1.94E-02                     | 20.5     | 20.5     | 20.5    | 0.012  |
| lsr             | 553218  | lipolysis stimulated lipoprotein receptor                   | 1.99E-01                     | 5.96E-02                     | 14.5     | 14.7     | 14.6    | 0.012  |
| zgc:158564      | 553264  | zgc:158564                                                  | 1.88E-02                     | 1.72E-01                     | 18.7     | 18.2     | 18.4    | 0.012  |
| im:7150454      | 553298  | im:7150454                                                  | 5.92E-02                     | 1.87E-01                     | 0.0      | 2.3      | 1.2     | 0.012  |
| ctns            | 553594  | cystinosis, nephropathic                                    | 5.72E-02                     | 1.96E-01                     | 13.3     | 15.8     | 14.6    | 0.012  |

**Table S1: Zebrafish circadian oscillating genes**

| Gene Symbol      | Gene ID | Gene Description                                            | Fisher's g test p value (LD) | Fisher's g test p value (DD) | LD Phase | DD Phase | Phase * | FDR ** |
|------------------|---------|-------------------------------------------------------------|------------------------------|------------------------------|----------|----------|---------|--------|
| parp12b          | 553633  | poly (ADP-ribose) polymerase family, member 12b             | 5.60E-02                     | 1.56E-01                     | 14.3     | 16.5     | 15.4    | 0.012  |
| sptlc2           | 553646  | serine palmitoyltransferase, long chain base subunit 2      | 2.88E-03                     | 1.66E-01                     | 22.2     | 2.7      | 0.5     | 0.012  |
| gins2            | 554146  | GINS complex subunit 2                                      | 1.96E-01                     | 9.29E-02                     | 3.5      | 4.8      | 4.2     | 0.012  |
| si:ch211-11m18.2 | 555268  | si:ch211-11m18.2                                            | 1.34E-03                     | 1.79E-01                     | 0.0      | 0.5      | 0.3     | 0.012  |
| tspan9           | 555341  | tetraspanin 9                                               | 1.86E-02                     | 1.54E-01                     | 16.3     | 17.5     | 16.9    | 0.012  |
| LOC555689        | 555689  | protein FAM115-like                                         | 1.05E-03                     | 1.83E-01                     | 4.2      | 5.3      | 4.8     | 0.012  |
| slc5a8l          | 556156  | solute carrier family 5 (iodide transporter), member 8-like | 6.90E-02                     | 1.78E-01                     | 20.7     | 22.2     | 21.5    | 0.012  |
| nudt17           | 556651  | nudix (nucleoside diphosphate linked moiety X)-type mot     | 7.42E-02                     | 1.98E-01                     | 13.9     | 16.3     | 15.1    | 0.012  |
| im:7142942       | 557319  | im:7142942                                                  | 1.57E-01                     | 1.46E-01                     | 14.8     | 18.0     | 16.4    | 0.012  |
| im:7137300       | 557360  | im:7137300                                                  | 1.52E-01                     | 1.96E-02                     | 14.4     | 15.4     | 14.9    | 0.012  |
| bbs7             | 557491  | Bardet-Biedl syndrome 7                                     | 1.36E-01                     | 1.62E-01                     | 14.8     | 16.8     | 15.8    | 0.012  |
| LOC557634        | 557634  | proline-rich protein 5-like                                 | 1.51E-02                     | 1.73E-01                     | 3.7      | 22.3     | 1.0     | 0.012  |
| LOC557782        | 557782  | similar to N-acetylgalactosaminyltransferase                | 4.39E-02                     | 1.65E-01                     | 16.0     | 18.5     | 17.3    | 0.012  |
| LOC557789        | 557789  | 39S ribosomal protein L47, mitochondrial-like               | 8.30E-02                     | 1.74E-01                     | 23.5     | 1.3      | 0.4     | 0.012  |
| slain2           | 557946  | SLAIN motif family, member 2                                | 1.97E-01                     | 1.28E-01                     | 15.8     | 19.5     | 17.7    | 0.012  |
| surf1            | 557970  | surfeit 1                                                   | 1.70E-03                     | 1.92E-01                     | 5.2      | 1.5      | 3.4     | 0.012  |
| si:dkeyp-104h9.6 | 558407  | si:dkeyp-104h9.6                                            | 2.43E-02                     | 1.97E-01                     | 5.5      | 5.2      | 5.4     | 0.012  |
| anpepa           | 558452  | alanyl (membrane) aminopeptidase a                          | 2.16E-03                     | 1.74E-01                     | 3.0      | 2.7      | 2.9     | 0.012  |
| pipox            | 558601  | pipecolic acid oxidase                                      | 1.60E-01                     | 1.44E-01                     | 10.8     | 9.0      | 9.9     | 0.012  |
| wu:fa99c08       | 558911  | wu:fa99c08                                                  | 1.93E-01                     | 6.54E-02                     | 0.7      | 2.2      | 1.5     | 0.012  |
| ptgis            | 559148  | prostaglandin I2 (prostacyclin) synthase                    | 6.27E-02                     | 1.85E-01                     | 7.0      | 9.7      | 8.4     | 0.012  |
| rgs11            | 559197  | regulator of G-protein signaling 11                         | 7.48E-03                     | 1.86E-01                     | 18.7     | 19.3     | 19.0    | 0.012  |
| zgc:153225       | 559769  | zgc:153225                                                  | 1.31E-01                     | 1.51E-01                     | 19.7     | 18.5     | 19.1    | 0.012  |
| zgc:162184       | 559822  | zgc:162184                                                  | 4.95E-03                     | 1.77E-01                     | 3.8      | 4.1      | 3.9     | 0.012  |
| si:dkey-33c12.4  | 560112  | si:dkey-33c12.4                                             | 9.07E-02                     | 1.99E-01                     | 2.7      | 3.6      | 3.2     | 0.012  |
| nolc1            | 561131  | nucleolar and coiled-body phosphoprotein 1                  | 3.29E-02                     | 1.54E-01                     | 22.7     | 7.3      | 3.0     | 0.012  |
| gfm1             | 561840  | G elongation factor, mitochondrial 1                        | 1.81E-01                     | 1.80E-01                     | 22.3     | 10.2     | 4.2     | 0.012  |
| neurla           | 561943  | neuralized homolog a (Drosophila)                           | 8.70E-02                     | 1.79E-01                     | 1.3      | 23.4     | 0.3     | 0.012  |
| irg1l            | 562007  | immunoresponsive gene 1, like                               | 1.65E-01                     | 1.00E-01                     | 20.7     | 21.4     | 21.0    | 0.012  |
| cyp4v7           | 562008  | cytochrome P450, family 4, subfamily V, polypeptide 7       | 1.84E-01                     | 1.55E-01                     | 12.8     | 15.7     | 14.3    | 0.012  |
| enpp1            | 562399  | ectonucleotide pyrophosphatase/phosphodiesterase 1          | 3.05E-02                     | 1.84E-01                     | 14.2     | 13.5     | 13.9    | 0.012  |

**Table S1: Zebrafish circadian oscillating genes**

| Gene Symbol      | Gene ID | Gene Description                                             | Fisher's g test p value (LD) | Fisher's g test p value (DD) | LD Phase | DD Phase | Phase * | FDR ** |
|------------------|---------|--------------------------------------------------------------|------------------------------|------------------------------|----------|----------|---------|--------|
| tbcd10a          | 562628  | TBC1 domain family, member 10A                               | 2.81E-02                     | 1.70E-01                     | 2.7      | 2.7      | 2.7     | 0.012  |
| atp11a           | 562925  | ATPase, class VI, type 11A                                   | 1.77E-01                     | 9.09E-02                     | 23.7     | 21.7     | 22.7    | 0.012  |
| nr1d4a           | 563150  | nuclear receptor subfamily 1, group D, member 4a             | 1.76E-01                     | 7.40E-02                     | 19.3     | 20.3     | 19.8    | 0.012  |
| trmt6            | 563475  | tRNA methyltransferase 6 homolog (S. cerevisiae)             | 1.02E-03                     | 1.51E-01                     | 12.7     | 12.7     | 12.7    | 0.012  |
| si:dkey-31f5.1   | 563896  | si:dkey-31f5.1                                               | 1.96E-01                     | 1.74E-01                     | 2.7      | 3.0      | 2.9     | 0.012  |
| si:ch211-210c8.6 | 564023  | si:ch211-210c8.6                                             | 3.99E-03                     | 1.73E-01                     | 5.8      | 5.9      | 5.8     | 0.012  |
| si:ch211-133l5.7 | 564121  | si:ch211-133l5.7                                             | 4.31E-02                     | 1.67E-01                     | 1.8      | 2.7      | 2.3     | 0.012  |
| ankrd1b          | 564159  | ankyrin repeat domain 1b (cardiac muscle)                    | 8.97E-03                     | 1.85E-01                     | 0.7      | 2.3      | 1.5     | 0.012  |
| st13             | 564225  | suppression of tumorigenicity 13 (colon carcinoma) (Hsp      | 9.48E-02                     | 1.59E-01                     | 5.7      | 9.5      | 7.6     | 0.012  |
| usp10            | 564632  | ubiquitin specific peptidase 10                              | 5.59E-02                     | 1.50E-01                     | 23.8     | 3.2      | 1.5     | 0.012  |
| mmaa             | 564760  | methylmalonic aciduria (cobalamin deficiency) cblA type      | 1.59E-01                     | 1.78E-01                     | 19.3     | 21.5     | 20.4    | 0.012  |
| tnfrsf21         | 564874  | tumor necrosis factor receptor superfamily, member 21        | 4.01E-02                     | 1.97E-01                     | 18.2     | 17.7     | 18.0    | 0.012  |
| LOC565002        | 565002  | interferon-inducible GTPase 5-like                           | 1.82E-01                     | 1.00E-01                     | 5.8      | 7.0      | 6.4     | 0.012  |
| slc2a9l1         | 565510  | solute carrier family 2 (facilitated glucose transporter), m | 6.90E-02                     | 1.68E-01                     | 1.9      | 3.3      | 2.6     | 0.012  |
| si:ch211-203b8.3 | 565995  | si:ch211-203b8.3                                             | 1.92E-01                     | 1.80E-01                     | 3.0      | 2.7      | 2.9     | 0.012  |
| tmem55a          | 566642  | transmembrane protein 55A                                    | 1.71E-01                     | 1.09E-01                     | 14.0     | 14.5     | 14.3    | 0.012  |
| cdc42bpb         | 567039  | CDC42 binding protein kinase beta (DMPK-like)                | 1.93E-01                     | 7.86E-02                     | 18.0     | 19.3     | 18.7    | 0.012  |
| LOC567074        | 567074  | kynurenine--oxoglutarate transaminase 3-like                 | 5.88E-03                     | 1.63E-01                     | 4.5      | 4.8      | 4.7     | 0.012  |
| smpd2            | 567548  | sphingomyelin phosphodiesterase 2, neutral                   | 1.68E-01                     | 4.05E-02                     | 4.0      | 2.5      | 3.3     | 0.012  |
| si:ch211-251p5.5 | 567691  | si:ch211-251p5.5                                             | 1.08E-01                     | 1.77E-01                     | 12.5     | 15.2     | 13.9    | 0.012  |
| zgc:123339       | 567972  | zgc:123339                                                   | 4.30E-02                     | 1.55E-01                     | 6.2      | 6.5      | 6.4     | 0.012  |
| si:dkey-222f2.1  | 568321  | si:dkey-222f2.1                                              | 7.11E-02                     | 2.00E-01                     | 15.5     | 17.3     | 16.4    | 0.012  |
| si:dkey-222f2.8  | 568423  | si:dkey-222f2.8                                              | 4.17E-02                     | 1.96E-01                     | 2.8      | 2.2      | 2.5     | 0.012  |
| kazald2          | 568748  | Kazal-type serine peptidase inhibitor domain 2               | 1.87E-01                     | 1.24E-01                     | 4.5      | 3.8      | 4.2     | 0.012  |
| srpr             | 569063  | signal recognition particle receptor (docking protein)       | 1.68E-01                     | 3.47E-02                     | 23.2     | 0.2      | 23.7    | 0.012  |
| si:dkey-119o24.1 | 569072  | si:dkey-119o24.1                                             | 2.56E-02                     | 1.72E-01                     | 5.3      | 4.8      | 5.1     | 0.012  |
| irak1            | 569226  | interleukin-1 receptor-associated kinase 1                   | 1.62E-01                     | 2.36E-02                     | 11.0     | 8.0      | 9.5     | 0.012  |
| chd7             | 569471  | chromodomain helicase DNA binding protein 7                  | 5.71E-02                     | 1.73E-01                     | 21.4     | 19.0     | 20.2    | 0.012  |
| si:dkey-60a16.3  | 569589  | si:dkey-60a16.3                                              | 1.63E-01                     | 1.02E-01                     | 21.8     | 17.5     | 19.7    | 0.012  |
| LOC570074        | 570074  | WD40 repeat-containing protein SMU1-like                     | 6.71E-02                     | 1.56E-01                     | 22.2     | 0.0      | 23.1    | 0.012  |
| LOC570420        | 570420  | protein TSPEAR-like                                          | 1.74E-01                     | 4.56E-02                     | 19.8     | 21.5     | 20.7    | 0.012  |

**Table S1: Zebrafish circadian oscillating genes**

| Gene Symbol       | Gene ID   | Gene Description                                       | Fisher's g test p value (LD) | Fisher's g test p value (DD) | LD Phase | DD Phase | Phase * | FDR ** |
|-------------------|-----------|--------------------------------------------------------|------------------------------|------------------------------|----------|----------|---------|--------|
| si:ch211-197g15.7 | 571377    | si:ch211-197g15.7                                      | 1.74E-01                     | 6.21E-02                     | 23.5     | 20.3     | 21.9    | 0.012  |
| wu:fb18f06        | 572235    | wu:fb18f06                                             | 3.85E-02                     | 1.67E-01                     | 7.0      | 7.0      | 7.0     | 0.012  |
| si:dkey-83f6.3    | 572492    | si:dkey-83f6.3                                         | 4.24E-02                     | 1.97E-01                     | 5.1      | 4.1      | 4.6     | 0.012  |
| dynll2b           | 572690    | dynein, light chain, LC8-type 2b                       | 7.47E-02                     | 1.57E-01                     | 2.3      | 3.0      | 2.7     | 0.012  |
| zgc:100843        | 573010    | zgc:100843                                             | 1.90E-01                     | 1.54E-01                     | 10.0     | 8.2      | 9.1     | 0.012  |
| zgc:153411        | 751688    | zgc:153411                                             | 5.80E-02                     | 1.93E-01                     | 16.2     | 18.2     | 17.2    | 0.012  |
| fgf10b            | 751792    | fibroblast growth factor 10b                           | 1.32E-03                     | 1.62E-01                     | 12.2     | 14.8     | 13.5    | 0.012  |
| zgc:153206        | 767788    | zgc:153206                                             | 1.22E-01                     | 1.68E-01                     | 6.2      | 3.2      | 4.7     | 0.012  |
| zgc:153952        | 777621    | zgc:153952                                             | 5.36E-02                     | 1.87E-01                     | 5.3      | 5.3      | 5.3     | 0.012  |
| phyhipla          | 790943    | phytanoyl-CoA 2-hydroxylase interacting protein-like a | 1.93E-04                     | 1.53E-01                     | 3.5      | 4.7      | 4.1     | 0.012  |
| zgc:158270        | 791213    | zgc:158270                                             | 1.82E-01                     | 1.16E-01                     | 15.8     | 16.5     | 16.2    | 0.012  |
| wnt11             | 791595    | wingless-type MMTV integration site family, member 11  | 1.04E-01                     | 1.57E-01                     | 11.5     | 9.6      | 10.6    | 0.012  |
| slc39a3           | 792986    | solute carrier family 39 (zinc transporter), member 3  | 5.02E-02                     | 1.60E-01                     | 13.0     | 17.3     | 15.2    | 0.012  |
| LOC793321         | 793321    | hypothetical protein LOC793321                         | 3.56E-03                     | 1.75E-01                     | 4.0      | 4.7      | 4.4     | 0.012  |
| pdcd11            | 794079    | programmed cell death 11                               | 7.35E-02                     | 1.97E-01                     | 0.6      | 1.8      | 1.2     | 0.012  |
| LOC795086         | 795086    | active breakpoint cluster region-related protein-like  | 1.79E-01                     | 1.00E-01                     | 19.8     | 20.3     | 20.1    | 0.012  |
| llgl2             | 795670    | lethal giant larvae homolog 2 (Drosophila)             | 1.94E-01                     | 5.78E-02                     | 14.2     | 14.0     | 14.1    | 0.012  |
| LOC796453         | 796453    | hypothetical LOC796453                                 | 4.28E-02                     | 1.94E-01                     | 13.0     | 14.8     | 13.9    | 0.012  |
| LOC796750         | 796750    | C1orf156-like                                          | 1.32E-01                     | 1.69E-01                     | 22.9     | 2.1      | 0.5     | 0.012  |
| sidt2             | 796833    | SID1 transmembrane family, member 2                    | 1.72E-01                     | 1.63E-01                     | 16.7     | 18.2     | 17.5    | 0.012  |
| LOC797244         | 797244    | kelch repeat and BTB domain-containing protein 13-like | 1.52E-01                     | 1.52E-01                     | 21.5     | 1.7      | 23.6    | 0.012  |
| LOC797409         | 797409    | voltage-dependent calcium channel gamma-5 subunit-lik  | 1.68E-01                     | 3.57E-02                     | 11.8     | 11.3     | 11.6    | 0.012  |
| zgc:171429        | 797867    | zgc:171429                                             | 1.12E-01                     | 1.83E-01                     | 15.2     | 17.2     | 16.2    | 0.012  |
| gemin5            | 799538    | gem (nuclear organelle) associated protein 5           | 5.52E-04                     | 1.92E-01                     | 21.7     | 21.8     | 21.8    | 0.012  |
| si:dkey-61p9.11   | 100000781 | si:dkey-61p9.11                                        | 2.34E-02                     | 1.57E-01                     | 19.7     | 20.5     | 20.1    | 0.012  |
| LOC10000884       | 10000884  | XK-related protein 5-like                              | 6.18E-02                     | 1.59E-01                     | 0.0      | 2.0      | 1.0     | 0.012  |
| LOC10001665       | 10001665  | hypothetical protein LOC10001665                       | 1.93E-01                     | 1.07E-01                     | 0.3      | 23.3     | 23.8    | 0.012  |
| LOC10001880       | 10001880  | up-regulator of cell proliferation-like                | 1.52E-01                     | 1.33E-01                     | 22.8     | 0.8      | 23.8    | 0.012  |
| zgc:110020        | 10002293  | zgc:110020                                             | 1.03E-01                     | 1.58E-01                     | 22.2     | 23.8     | 23.0    | 0.012  |
| p4ha1b            | 10003675  | prolyl 4-hydroxylase, alpha polypeptide I b            | 8.39E-02                     | 1.74E-01                     | 0.2      | 2.3      | 1.3     | 0.012  |
| LOC10004175       | 10004175  | cyclin-dependent kinase inhibitor 1C-like              | 8.25E-02                     | 1.57E-01                     | 3.3      | 3.7      | 3.5     | 0.012  |

**Table S1: Zebrafish circadian oscillating genes**

| Gene Symbol      | Gene ID   | Gene Description                                                             | Fisher's g test p value (LD) | Fisher's g test p value (DD) | LD Phase | DD Phase | Phase * | FDR ** |
|------------------|-----------|------------------------------------------------------------------------------|------------------------------|------------------------------|----------|----------|---------|--------|
| LOC10005267      | 10005267  | RING finger protein 122-like                                                 | 1.85E-01                     | 1.59E-01                     | 14.8     | 14.8     | 14.8    | 0.012  |
| si:dkey-204a24.6 | 10005886  | si:dkey-204a24.6                                                             | 1.76E-01                     | 1.77E-01                     | 3.8      | 3.7      | 3.8     | 0.012  |
| gls2             | 10006303  | glutaminase 2 (liver, mitochondrial)                                         | 1.54E-01                     | 1.63E-01                     | 7.3      | 4.8      | 6.1     | 0.012  |
| csnk1e           | 10006858  | casein kinase 1, epsilon                                                     | 1.88E-01                     | 6.99E-02                     | 13.0     | 15.2     | 14.1    | 0.012  |
| zgc:175280       | 10007793  | zgc:175280                                                                   | 1.78E-01                     | 1.03E-01                     | 1.8      | 3.5      | 2.7     | 0.012  |
| kcnc2            | 100037377 | potassium voltage-gated channel, Shaw-related subfamil                       | 7.73E-02                     | 1.81E-01                     | 17.2     | 18.2     | 17.7    | 0.012  |
| prkg2            | 100125912 | protein kinase, cGMP-dependent, type II                                      | 1.89E-02                     | 1.55E-01                     | 5.5      | 3.3      | 4.4     | 0.012  |
| btr22            | 100144555 | bloodthirsty-related gene family, member 22                                  | 2.45E-03                     | 1.71E-01                     | 13.5     | 14.7     | 14.1    | 0.012  |
| LOC100148772     | 100148772 | uncharacterized protein DKFZp761E198 homolog                                 | 9.26E-02                     | 1.92E-01                     | 12.5     | 14.8     | 13.7    | 0.012  |
| LOC100150452     | 100150452 | sodium- and chloride-dependent creatine transporter 1-lil                    | 1.52E-01                     | 1.80E-01                     | 17.0     | 18.3     | 17.7    | 0.012  |
| LOC100151195     | 100151195 | hereditary hemochromatosis protein homolog                                   | 1.99E-01                     | 1.26E-01                     | 2.8      | 3.5      | 3.1     | 0.012  |
| LOC100330593     | 100330593 | hypothetical protein LOC100330593                                            | 1.96E-02                     | 1.57E-01                     | 2.0      | 1.5      | 1.8     | 0.012  |
| galnt13          | 100330695 | UDP-N-acetyl-alpha-D-galactosamine:polypeptide N-ace                         | 1.27E-01                     | 1.89E-01                     | 19.8     | 17.8     | 18.8    | 0.012  |
| LOC100333914     | 100333914 | c-C motif chemokine 25-like                                                  | 1.16E-01                     | 1.54E-01                     | 18.5     | 17.7     | 18.1    | 0.012  |
| LOC100334727     | 100334727 | hypothetical protein LOC100334727                                            | 1.77E-01                     | 1.58E-01                     | 13.2     | 17.5     | 15.4    | 0.012  |
| qk               | 30471     | quaking                                                                      | 1.37E-01                     | 2.50E-01                     | 23.2     | 20.2     | 21.7    | 0.016  |
| six3a            | 30635     | sine oculis homeobox homolog 3a                                              | 2.02E-01                     | 1.11E-01                     | 16.8     | 18.0     | 17.4    | 0.016  |
| gfap             | 30646     | glial fibrillary acidic protein                                              | 2.38E-01                     | 1.75E-01                     | 10.5     | 11.0     | 10.8    | 0.016  |
| fabp2            | 30708     | fatty acid binding protein 2, intestinal                                     | 1.38E-01                     | 2.45E-01                     | 3.1      | 6.0      | 4.6     | 0.016  |
| tradd            | 58130     | tnfrsf1a-associated via death domain                                         | 5.65E-03                     | 2.30E-01                     | 12.2     | 15.3     | 13.8    | 0.016  |
| gart             | 58141     | phosphoribosylglycinamide formyltransferase                                  | 2.07E-01                     | 8.92E-02                     | 1.4      | 3.0      | 2.2     | 0.016  |
| robo2            | 60309     | roundabout homolog 2                                                         | 2.00E-01                     | 2.15E-01                     | 22.2     | 17.2     | 19.7    | 0.016  |
| sec22ba          | 114464    | SEC22 vesicle trafficking protein homolog B (S. cerevisia                    | 6.98E-02                     | 2.25E-01                     | 23.2     | 0.0      | 23.6    | 0.016  |
| tnfsf10l         | 114466    | tumor necrosis factor (ligand) superfamily, member 10 lik                    | 9.30E-02                     | 2.04E-01                     | 15.1     | 16.9     | 16.0    | 0.016  |
| maf              | 114467    | v-maf musculoaponeurotic fibrosarcoma (avian) oncoger                        | 2.18E-01                     | 2.42E-01                     | 11.9     | 3.1      | 7.5     | 0.016  |
| prkci            | 117507    | protein kinase C, iota                                                       | 7.28E-02                     | 2.15E-01                     | 17.0     | 22.5     | 19.8    | 0.016  |
| jag1a            | 140421    | jagged 1a                                                                    | 6.55E-02                     | 2.42E-01                     | 16.3     | 17.3     | 16.8    | 0.016  |
| psma6a           | 171585    | proteasome (prosome, macropain) subunit, alpha type, 6                       | 4.53E-02                     | 2.29E-01                     | 18.0     | 19.7     | 18.9    | 0.016  |
| atp1a1a.5        | 245703    | ATPase, Na <sup>+</sup> /K <sup>+</sup> transporting, alpha 1a.5 polypeptide | 1.15E-01                     | 2.21E-01                     | 17.8     | 0.0      | 20.9    | 0.016  |
| bbs2             | 259187    | Bardet-Biedl syndrome 2                                                      | 2.25E-01                     | 7.85E-02                     | 21.0     | 20.2     | 20.6    | 0.016  |
| trpm7            | 280653    | transient receptor potential cation channel, subfamily M,                    | 1.58E-01                     | 2.35E-01                     | 19.3     | 20.3     | 19.8    | 0.016  |



**Table S1: Zebrafish circadian oscillating genes**

| Gene Symbol       | Gene ID | Gene Description                                     | Fisher's g test p value (LD) | Fisher's g test p value (DD) | LD Phase | DD Phase | Phase * | FDR ** |
|-------------------|---------|------------------------------------------------------|------------------------------|------------------------------|----------|----------|---------|--------|
| mcm5              | 286747  | MCM5 minichromosome maintenance deficient 5 (S. cer  | 2.08E-01                     | 1.96E-01                     | 2.7      | 4.3      | 3.5     | 0.016  |
| apobl             | 321166  | apolipoprotein B, like                               | 2.38E-01                     | 1.30E-01                     | 6.2      | 8.3      | 7.3     | 0.016  |
| phb               | 321346  | prohibitin                                           | 1.00E-01                     | 2.18E-01                     | 0.8      | 2.0      | 1.4     | 0.016  |
| ephx1l            | 322331  | epoxide hydrolase 1, like                            | 2.08E-01                     | 5.81E-03                     | 5.9      | 5.8      | 5.8     | 0.016  |
| wu:fb70a12        | 322680  | wu:fb70a12                                           | 2.10E-01                     | 8.29E-02                     | 14.2     | 16.0     | 15.1    | 0.016  |
| lasp1             | 323216  | LIM and SH3 protein 1                                | 3.38E-02                     | 2.04E-01                     | 15.1     | 16.3     | 15.7    | 0.016  |
| si:dkeyp-95d10.1  | 323834  | si:dkeyp-95d10.1                                     | 1.56E-02                     | 2.41E-01                     | 5.8      | 6.3      | 6.1     | 0.016  |
| wu:fc16h08        | 324016  | wu:fc16h08                                           | 2.06E-01                     | 1.64E-01                     | 5.5      | 6.2      | 5.9     | 0.016  |
| zgc:77415         | 324587  | zgc:77415                                            | 2.20E-01                     | 1.41E-01                     | 17.3     | 17.2     | 17.3    | 0.016  |
| plaa              | 324855  | phospholipase A2-activating protein                  | 2.32E-01                     | 7.58E-02                     | 16.7     | 18.3     | 17.5    | 0.016  |
| nsun2             | 325292  | NOL1/NOP2/Sun domain family, member 2                | 1.11E-02                     | 2.18E-01                     | 0.7      | 3.2      | 2.0     | 0.016  |
| si:ch211-150c22.2 | 325430  | si:ch211-150c22.2                                    | 2.49E-01                     | 2.21E-01                     | 13.1     | 16.6     | 14.9    | 0.016  |
| wu:fd51h11        | 325964  | wu:fd51h11                                           | 2.25E-01                     | 3.82E-02                     | 6.5      | 4.8      | 5.7     | 0.016  |
| ofd1              | 327216  | oral-facial-digital syndrome 1                       | 3.28E-02                     | 2.21E-01                     | 12.5     | 16.7     | 14.6    | 0.016  |
| srp72             | 327335  | signal recognition particle 72                       | 2.11E-01                     | 5.49E-02                     | 22.3     | 1.0      | 23.7    | 0.016  |
| mtmr6             | 327346  | myotubularin related protein 6                       | 5.29E-03                     | 2.30E-01                     | 12.5     | 12.2     | 12.4    | 0.016  |
| kpna4             | 327373  | karyopherin alpha 4 (importin alpha 3)               | 1.79E-02                     | 2.01E-01                     | 19.8     | 19.3     | 19.6    | 0.016  |
| zc3h15            | 334307  | zinc finger CCCH-type containing 15                  | 1.19E-01                     | 2.16E-01                     | 22.6     | 1.3      | 23.9    | 0.016  |
| wu:fi42h12        | 334358  | wu:fi42h12                                           | 1.39E-03                     | 2.10E-01                     | 14.0     | 19.7     | 16.9    | 0.016  |
| nol6              | 334362  | nucleolar protein family 6 (RNA-associated)          | 2.37E-01                     | 2.00E-01                     | 22.9     | 1.2      | 0.0     | 0.016  |
| zgc:101121        | 336461  | zgc:101121                                           | 6.02E-02                     | 2.08E-01                     | 13.5     | 16.7     | 15.1    | 0.016  |
| zgc:63831         | 336746  | zgc:63831                                            | 1.27E-02                     | 2.50E-01                     | 13.5     | 16.3     | 14.9    | 0.016  |
| plcd1b            | 337489  | phospholipase C, delta 1b                            | 1.73E-02                     | 2.32E-01                     | 10.8     | 13.5     | 12.2    | 0.016  |
| tph1a             | 352943  | tryptophan hydroxylase 1 (tryptophan 5-monooxygenase | 5.46E-04                     | 2.16E-01                     | 16.2     | 17.3     | 16.8    | 0.016  |
| dcp1a             | 360153  | decapping enzyme                                     | 2.02E-01                     | 1.61E-01                     | 15.5     | 13.7     | 14.6    | 0.016  |
| penka             | 368228  | proenkephalin a                                      | 2.15E-01                     | 1.38E-01                     | 3.6      | 4.8      | 4.2     | 0.016  |
| prickle2          | 368250  | prickle-like 2 (Drosophila)                          | 2.22E-01                     | 6.27E-02                     | 15.5     | 15.4     | 15.5    | 0.016  |
| mycbp2            | 368439  | MYC binding protein 2                                | 5.39E-03                     | 2.11E-01                     | 21.2     | 19.2     | 20.2    | 0.016  |
| pdzk1ip1l         | 368722  | PDZK1 interacting protein 1, like                    | 8.10E-02                     | 2.08E-01                     | 17.5     | 18.9     | 18.2    | 0.016  |
| si:busm1-241h12.4 | 368857  | si:busm1-241h12.4                                    | 2.27E-01                     | 3.18E-03                     | 2.8      | 23.2     | 1.0     | 0.016  |
| pip5k2            | 373124  | phosphatidylinositol-4-phosphate 5-kinase, type II   | 1.29E-03                     | 2.10E-01                     | 14.5     | 14.7     | 14.6    | 0.016  |

**Table S1: Zebrafish circadian oscillating genes**

| Gene Symbol | Gene ID | Gene Description                                             | Fisher's g test p value (LD) | Fisher's g test p value (DD) | LD Phase | DD Phase | Phase * | FDR ** |
|-------------|---------|--------------------------------------------------------------|------------------------------|------------------------------|----------|----------|---------|--------|
| aktip       | 378716  | akt interacting protein                                      | 4.21E-02                     | 2.49E-01                     | 15.7     | 18.2     | 17.0    | 0.016  |
| apc         | 386762  | adenomatosis polyposis coli                                  | 2.14E-01                     | 1.31E-02                     | 16.5     | 12.7     | 14.6    | 0.016  |
| ca2         | 387526  | carbonic anhydrase II                                        | 1.43E-02                     | 2.48E-01                     | 0.9      | 2.6      | 1.7     | 0.016  |
| sepsecs     | 393123  | Sep (O-phosphoserine) tRNA:Sec (selenocysteine) tRNA         | 2.08E-01                     | 1.24E-01                     | 17.2     | 17.7     | 17.5    | 0.016  |
| umps        | 393143  | uridine monophosphate synthetase                             | 1.93E-01                     | 2.35E-01                     | 0.2      | 2.7      | 1.5     | 0.016  |
| tigarb      | 393160  | tp53-induced glycolysis and apoptosis regulator b            | 1.37E-03                     | 2.24E-01                     | 2.0      | 2.5      | 2.3     | 0.016  |
| tpst1l      | 393171  | tyrosylprotein sulfotransferase 1, like                      | 2.37E-01                     | 1.79E-01                     | 18.0     | 17.8     | 17.9    | 0.016  |
| hif1ab      | 393202  | hypoxia-inducible factor 1, alpha subunit (basic helix-loop) | 5.29E-02                     | 2.48E-01                     | 0.2      | 22.7     | 23.5    | 0.016  |
| zgc:56525   | 393249  | zgc:56525                                                    | 6.49E-02                     | 2.22E-01                     | 12.8     | 15.5     | 14.2    | 0.016  |
| mrpl45      | 393277  | mitochondrial ribosomal protein L45                          | 3.58E-02                     | 2.13E-01                     | 23.0     | 21.7     | 22.4    | 0.016  |
| tnfaip8l3   | 393322  | tumor necrosis factor, alpha-induced protein 8-like 3        | 1.93E-02                     | 2.27E-01                     | 3.8      | 3.7      | 3.8     | 0.016  |
| zgc:64141   | 393353  | zgc:64141                                                    | 1.27E-01                     | 2.14E-01                     | 1.8      | 3.2      | 2.5     | 0.016  |
| gstt1b      | 393556  | glutathione S-transferase theta 1b                           | 5.53E-02                     | 2.48E-01                     | 11.0     | 11.3     | 11.2    | 0.016  |
| zgc:63614   | 393580  | zgc:63614                                                    | 4.58E-02                     | 2.17E-01                     | 6.5      | 5.1      | 5.8     | 0.016  |
| timm50      | 393638  | translocase of inner mitochondrial membrane 50 homolog       | 2.31E-01                     | 2.24E-01                     | 22.4     | 22.3     | 22.3    | 0.016  |
| aanat1      | 393677  | arylalkylamine N-acetyltransferase 1                         | 4.09E-03                     | 2.47E-01                     | 19.3     | 20.0     | 19.7    | 0.016  |
| slc22a4     | 393822  | solute carrier family 22 (organic cation/ergothioneine trans | 1.21E-01                     | 2.19E-01                     | 2.3      | 3.3      | 2.8     | 0.016  |
| nek4        | 393987  | NIMA (never in mitosis gene a)-related kinase 4              | 2.28E-02                     | 2.08E-01                     | 11.7     | 14.0     | 12.9    | 0.016  |
| msi2b       | 394084  | musashi homolog 2b (Drosophila)                              | 6.19E-02                     | 2.41E-01                     | 1.7      | 6.8      | 4.3     | 0.016  |
| zgc:55307   | 394104  | zgc:55307                                                    | 3.54E-02                     | 2.29E-01                     | 20.5     | 22.3     | 21.4    | 0.016  |
| rem1        | 394149  | rad and gem related GTP binding protein 1                    | 9.89E-04                     | 2.30E-01                     | 15.0     | 16.3     | 15.7    | 0.016  |
| bcs1l       | 394157  | BCS1-like (yeast)                                            | 2.04E-01                     | 2.28E-01                     | 22.7     | 0.7      | 23.7    | 0.016  |
| tra2b       | 394172  | transformer 2 beta homolog (Drosophila)                      | 1.04E-01                     | 2.39E-01                     | 3.3      | 2.7      | 3.0     | 0.016  |
| st3gal5     | 394230  | ST3 beta-galactoside alpha-2,3-sialyltransferase 5           | 2.86E-03                     | 2.03E-01                     | 16.3     | 17.3     | 16.8    | 0.016  |
| mapk3       | 399480  | mitogen-activated protein kinase 3                           | 7.55E-02                     | 2.44E-01                     | 23.2     | 19.2     | 21.2    | 0.016  |
| twistnb     | 402856  | TWIST neighbor                                               | 4.19E-02                     | 2.01E-01                     | 23.3     | 1.7      | 0.5     | 0.016  |
| gtpbp1l     | 402863  | GTP binding protein 1, like                                  | 1.28E-01                     | 2.36E-01                     | 17.0     | 20.8     | 18.9    | 0.016  |
| zgc:77713   | 402894  | zgc:77713                                                    | 1.04E-01                     | 2.34E-01                     | 13.9     | 16.4     | 15.1    | 0.016  |
| slc30a6     | 402949  | solute carrier family 30 (zinc transporter), member 6        | 1.01E-01                     | 2.09E-01                     | 15.2     | 16.5     | 15.9    | 0.016  |
| ezrl        | 403009  | ezrin like                                                   | 3.31E-04                     | 2.13E-01                     | 3.0      | 4.1      | 3.5     | 0.016  |
| slc31a1     | 403028  | solute carrier family 31 (copper transporters), member 1     | 8.96E-02                     | 2.05E-01                     | 0.4      | 1.3      | 0.8     | 0.016  |

**Table S1: Zebrafish circadian oscillating genes**

| Gene Symbol | Gene ID | Gene Description                                        | Fisher's g test p value (LD) | Fisher's g test p value (DD) | LD Phase | DD Phase | Phase * | FDR ** |
|-------------|---------|---------------------------------------------------------|------------------------------|------------------------------|----------|----------|---------|--------|
| tab1        | 403084  | TGF-beta activated kinase 1/MAP3K7 binding protein 1    | 2.29E-01                     | 6.75E-02                     | 16.2     | 17.7     | 17.0    | 0.016  |
| n6amt2      | 404619  | N-6 adenine-specific DNA methyltransferase 2 (putative) | 2.29E-01                     | 1.75E-01                     | 1.0      | 2.0      | 1.5     | 0.016  |
| zgc:56699   | 405758  | zgc:56699                                               | 2.15E-01                     | 1.46E-01                     | 11.9     | 1.7      | 6.8     | 0.016  |
| gatad2a     | 405852  | GATA zinc finger domain containing 2A                   | 5.99E-02                     | 2.39E-01                     | 19.7     | 18.3     | 19.0    | 0.016  |
| zgc:85858   | 405879  | zgc:85858                                               | 2.32E-01                     | 3.90E-02                     | 22.3     | 4.2      | 1.3     | 0.016  |
| sucla2      | 406299  | succinate-CoA ligase, ADP-forming, beta subunit         | 1.54E-01                     | 2.06E-01                     | 18.0     | 20.5     | 19.3    | 0.016  |
| dok1b       | 406361  | docking protein 1b                                      | 5.00E-02                     | 2.06E-01                     | 14.0     | 16.7     | 15.4    | 0.016  |
| zgc:76871   | 406376  | zgc:76871                                               | 2.22E-01                     | 1.44E-01                     | 18.3     | 18.0     | 18.2    | 0.016  |
| yy1b        | 406394  | YY1 transcription factor b                              | 7.39E-02                     | 2.37E-01                     | 16.2     | 17.3     | 16.7    | 0.016  |
| mre11a      | 406637  | meiotic recombination 11 homolog A (S. cerevisiae)      | 2.08E-01                     | 4.03E-03                     | 2.9      | 4.1      | 3.5     | 0.016  |
| zgc:56304   | 406683  | zgc:56304                                               | 1.09E-02                     | 2.01E-01                     | 0.3      | 2.7      | 1.5     | 0.016  |
| tmem184a    | 406841  | transmembrane protein 184a                              | 5.77E-02                     | 2.34E-01                     | 22.7     | 1.2      | 24.0    | 0.016  |
| ptpn4b      | 407634  | protein tyrosine phosphatase, non-receptor type 4, b    | 1.35E-01                     | 2.26E-01                     | 2.0      | 3.7      | 2.8     | 0.016  |
| zgc:91852   | 431744  | zgc:91852                                               | 1.64E-01                     | 2.05E-01                     | 4.0      | 1.8      | 2.9     | 0.016  |
| pdss2       | 436624  | prenyl (decaprenyl) diphosphate synthase, subunit 2     | 1.49E-01                     | 2.19E-01                     | 23.0     | 0.8      | 23.9    | 0.016  |
| zgc:92670   | 436691  | zgc:92670                                               | 5.19E-03                     | 2.44E-01                     | 22.3     | 22.2     | 22.3    | 0.016  |
| adipor1a    | 436740  | adiponectin receptor 1a                                 | 5.08E-02                     | 2.07E-01                     | 17.1     | 18.4     | 17.7    | 0.016  |
| psmf1       | 436820  | proteasome (prosome, macropain) inhibitor subunit 1     | 1.79E-01                     | 2.26E-01                     | 15.3     | 16.3     | 15.8    | 0.016  |
| suclg1      | 436850  | succinate-CoA ligase, GDP-forming, alpha subunit        | 1.36E-01                     | 2.07E-01                     | 1.7      | 1.5      | 1.6     | 0.016  |
| zgc:92201   | 436913  | zgc:92201                                               | 1.13E-01                     | 2.40E-01                     | 16.0     | 19.4     | 17.7    | 0.016  |
| rnf144ab    | 437000  | ring finger protein 144ab                               | 1.62E-01                     | 2.36E-01                     | 11.5     | 11.5     | 11.5    | 0.016  |
| zgc:91963   | 445108  | zgc:91963                                               | 4.34E-02                     | 2.43E-01                     | 15.9     | 19.3     | 17.6    | 0.016  |
| sdhc        | 445129  | succinate dehydrogenase complex, subunit C, integral m  | 2.38E-01                     | 1.11E-01                     | 5.8      | 1.8      | 3.8     | 0.016  |
| pibf1       | 445181  | progesterone immunomodulatory binding factor 1          | 4.58E-02                     | 2.20E-01                     | 11.7     | 13.2     | 12.5    | 0.016  |
| uevld       | 445225  | UEV and lactate/malate dehydrogenase domains            | 2.09E-01                     | 1.22E-01                     | 15.0     | 20.7     | 17.9    | 0.016  |
| tim8a       | 445243  | translocase of inner mitochondrial membrane 8 homolog   | 4.94E-03                     | 2.03E-01                     | 23.2     | 1.0      | 0.1     | 0.016  |
| cep57l1     | 445312  | centrosomal protein 57-like 1                           | 5.39E-02                     | 2.04E-01                     | 9.5      | 10.8     | 10.2    | 0.016  |
| gtf3aa      | 445389  | general transcription factor IIIAa                      | 5.86E-02                     | 2.08E-01                     | 23.7     | 1.3      | 0.5     | 0.016  |
| psmb1       | 445413  | proteasome (prosome, macropain) subunit, beta type, 1   | 2.21E-01                     | 1.14E-01                     | 21.7     | 21.2     | 21.5    | 0.016  |
| aldh8a1     | 447801  | aldehyde dehydrogenase 8 family, member A1              | 2.29E-01                     | 1.44E-01                     | 12.3     | 13.0     | 12.7    | 0.016  |
| zgc:103424  | 447877  | zgc:103424                                              | 2.09E-01                     | 1.98E-01                     | 13.8     | 15.0     | 14.4    | 0.016  |

**Table S1: Zebrafish circadian oscillating genes**

| Gene Symbol     | Gene ID | Gene Description                                             | Fisher's g test p value (LD) | Fisher's g test p value (DD) | LD Phase | DD Phase | Phase * | FDR ** |
|-----------------|---------|--------------------------------------------------------------|------------------------------|------------------------------|----------|----------|---------|--------|
| osbpl3a         | 447908  | oxysterol binding protein-like 3a                            | 3.03E-02                     | 2.46E-01                     | 3.5      | 4.6      | 4.1     | 0.016  |
| mrpl17          | 447945  | mitochondrial ribosomal protein L17                          | 7.53E-02                     | 2.22E-01                     | 0.5      | 1.7      | 1.1     | 0.016  |
| atg4b           | 448859  | ATG4 autophagy related 4 homolog B ( <i>S. cerevisiae</i> )  | 2.21E-01                     | 1.17E-01                     | 12.8     | 15.4     | 14.1    | 0.016  |
| mvk             | 492477  | mevalonate kinase                                            | 9.75E-02                     | 2.31E-01                     | 1.9      | 2.4      | 2.1     | 0.016  |
| plekha8         | 492502  | pleckstrin homology domain containing, family A (phospho     | 7.63E-02                     | 2.25E-01                     | 1.2      | 1.2      | 1.2     | 0.016  |
| ttc36           | 492516  | tetratricopeptide repeat domain 36                           | 1.58E-02                     | 2.13E-01                     | 7.7      | 7.8      | 7.8     | 0.016  |
| fam173b         | 492519  | family with sequence similarity 173, member B                | 1.29E-01                     | 2.06E-01                     | 12.1     | 0.8      | 6.4     | 0.016  |
| zgc:101777      | 492762  | zgc:101777                                                   | 1.81E-02                     | 2.44E-01                     | 13.8     | 16.2     | 15.0    | 0.016  |
| rbm41           | 492764  | RNA binding motif protein 41                                 | 4.42E-03                     | 2.01E-01                     | 13.7     | 12.5     | 13.1    | 0.016  |
| nsfl1c          | 492805  | NSFL1 (p97) cofactor (p47)                                   | 6.86E-02                     | 2.30E-01                     | 18.2     | 20.2     | 19.2    | 0.016  |
| ift80           | 494082  | intraflagellar transport 80 homolog ( <i>Chlamydomonas</i> ) | 4.28E-02                     | 2.31E-01                     | 13.3     | 15.7     | 14.5    | 0.016  |
| xirp1           | 497637  | xin actin-binding repeat containing 1                        | 2.32E-01                     | 5.21E-02                     | 14.2     | 16.2     | 15.2    | 0.016  |
| zgc:113418      | 503527  | zgc:113418                                                   | 1.57E-01                     | 2.24E-01                     | 11.8     | 9.7      | 10.8    | 0.016  |
| prnprs3         | 503702  | prion protein, related sequence 3                            | 1.31E-01                     | 2.35E-01                     | 15.1     | 14.8     | 15.0    | 0.016  |
| rfc2            | 503748  | replication factor C (activator 1) 2                         | 2.34E-01                     | 1.71E-01                     | 4.7      | 5.8      | 5.3     | 0.016  |
| zgc:110340      | 541345  | zgc:110340                                                   | 2.37E-01                     | 1.61E-01                     | 16.7     | 18.2     | 17.5    | 0.016  |
| dbt             | 541388  | dihydrolipoamide branched chain transacylase E2              | 1.36E-01                     | 2.02E-01                     | 4.0      | 4.5      | 4.3     | 0.016  |
| zgc:112175      | 550414  | zgc:112175                                                   | 7.82E-04                     | 2.21E-01                     | 1.0      | 0.5      | 0.8     | 0.016  |
| zgc:112433      | 550469  | zgc:112433                                                   | 2.19E-01                     | 2.48E-01                     | 2.3      | 2.7      | 2.5     | 0.016  |
| zgc:112432      | 550477  | zgc:112432                                                   | 4.73E-03                     | 2.00E-01                     | 5.9      | 5.5      | 5.7     | 0.016  |
| psmb4           | 550499  | proteasome (prosome, macropain) subunit, beta type, 4        | 2.03E-01                     | 8.43E-02                     | 18.1     | 20.0     | 19.1    | 0.016  |
| ppa1            | 550531  | pyrophosphatase (inorganic) 1                                | 1.61E-01                     | 2.31E-01                     | 2.3      | 3.8      | 3.1     | 0.016  |
| zgc:110179      | 550538  | zgc:110179                                                   | 7.01E-05                     | 2.00E-01                     | 13.5     | 15.5     | 14.5    | 0.016  |
| necab1          | 550546  | N-terminal EF-hand calcium binding protein 1                 | 7.01E-04                     | 2.11E-01                     | 3.0      | 3.8      | 3.4     | 0.016  |
| ppp1r14aa       | 550561  | protein phosphatase 1, regulatory (inhibitor) subunit 14A    | 2.92E-03                     | 2.39E-01                     | 4.8      | 4.0      | 4.4     | 0.016  |
| zgc:110605      | 550597  | zgc:110605                                                   | 1.28E-01                     | 2.12E-01                     | 13.4     | 13.8     | 13.6    | 0.016  |
| slc6a19a        | 553256  | solute carrier family 6 (neurotransmitter transporter), mem  | 7.06E-02                     | 2.49E-01                     | 22.6     | 0.6      | 23.6    | 0.016  |
| gnptab          | 553365  | N-acetylglucosamine-1-phosphate transferase, alpha an        | 2.13E-03                     | 2.36E-01                     | 14.5     | 15.8     | 15.2    | 0.016  |
| si:dkey-76k16.7 | 553448  | si:dkey-76k16.7                                              | 2.37E-01                     | 1.73E-01                     | 1.2      | 2.6      | 1.9     | 0.016  |
| zgc:110046      | 553583  | zgc:110046                                                   | 6.33E-02                     | 2.16E-01                     | 0.3      | 2.0      | 1.2     | 0.016  |
| nle1            | 553606  | notchless homolog 1 ( <i>Drosophila</i> )                    | 2.43E-01                     | 4.46E-02                     | 22.2     | 22.5     | 22.4    | 0.016  |

**Table S1: Zebrafish circadian oscillating genes**

| Gene Symbol       | Gene ID | Gene Description                                              | Fisher's g test p value (LD) | Fisher's g test p value (DD) | LD Phase | DD Phase | Phase * | FDR ** |
|-------------------|---------|---------------------------------------------------------------|------------------------------|------------------------------|----------|----------|---------|--------|
| cyp1c1            | 553637  | cytochrome P450, family 1, subfamily C, polypeptide 1         | 1.70E-01                     | 2.07E-01                     | 1.5      | 1.3      | 1.4     | 0.016  |
| ndufs5            | 553660  | NADH dehydrogenase (ubiquinone) Fe-S protein 5                | 1.48E-01                     | 2.42E-01                     | 1.5      | 2.7      | 2.1     | 0.016  |
| clpp              | 553713  | ClpP caseinolytic peptidase, ATP-dependent, proteolytic       | 2.03E-01                     | 2.09E-01                     | 18.3     | 19.9     | 19.1    | 0.016  |
| lrrc4c            | 553785  | leucine rich repeat containing 4C                             | 2.27E-01                     | 9.41E-02                     | 16.3     | 17.0     | 16.7    | 0.016  |
| pcdh1gb9          | 553940  | protocadherin 1 gamma b 9                                     | 5.20E-02                     | 2.22E-01                     | 13.3     | 14.8     | 14.1    | 0.016  |
| inaa              | 555251  | internexin neuronal intermediate filament protein, alpha ε    | 1.97E-01                     | 2.41E-01                     | 3.5      | 3.5      | 3.5     | 0.016  |
| zgc:171630        | 555328  | zgc:171630                                                    | 2.09E-01                     | 1.77E-01                     | 4.8      | 4.3      | 4.6     | 0.016  |
| cyp2aa12          | 555510  | cytochrome P450, family 2, subfamily AA, polypeptide 12       | 8.78E-02                     | 2.24E-01                     | 6.0      | 6.9      | 6.4     | 0.016  |
| si:ch73-212e20.3  | 555558  | si:ch73-212e20.3                                              | 2.25E-04                     | 2.43E-01                     | 19.8     | 22.7     | 21.3    | 0.016  |
| cd164             | 555639  | CD164 molecule, sialomucin                                    | 2.17E-01                     | 6.67E-02                     | 13.8     | 15.7     | 14.8    | 0.016  |
| mdn1              | 555704  | midasin homolog (yeast)                                       | 8.33E-02                     | 2.19E-01                     | 0.6      | 2.6      | 1.6     | 0.016  |
| zgc:109953        | 555951  | zgc:109953                                                    | 1.79E-01                     | 2.32E-01                     | 12.7     | 8.7      | 10.7    | 0.016  |
| tcap              | 556258  | titin-cap (telethonin)                                        | 1.47E-02                     | 2.46E-01                     | 3.0      | 3.0      | 3.0     | 0.016  |
| fxn               | 556389  | frataxin                                                      | 3.22E-02                     | 2.36E-01                     | 2.0      | 1.7      | 1.9     | 0.016  |
| prom2             | 556596  | prominin 2                                                    | 2.91E-02                     | 2.07E-01                     | 13.0     | 15.8     | 14.4    | 0.016  |
| stxbp5a           | 556789  | syntaxin binding protein 5a (tomosyn)                         | 3.39E-03                     | 2.00E-01                     | 3.7      | 4.5      | 4.1     | 0.016  |
| cnrip1            | 556881  | cannabinoid receptor interacting protein 1                    | 2.88E-02                     | 2.26E-01                     | 18.2     | 18.0     | 18.1    | 0.016  |
| frem1b            | 557221  | Fras-related extracellular matrix protein 1b                  | 3.36E-02                     | 2.25E-01                     | 17.8     | 19.1     | 18.4    | 0.016  |
| hcn2              | 557285  | hyperpolarization activated cyclic nucleotide-gated potas     | 4.34E-05                     | 2.05E-01                     | 23.7     | 23.8     | 23.8    | 0.016  |
| si:dkey-158b13.2  | 557667  | si:dkey-158b13.2                                              | 2.49E-01                     | 2.22E-01                     | 17.8     | 15.7     | 16.8    | 0.016  |
| im:7159098        | 557849  | im:7159098                                                    | 1.17E-01                     | 2.41E-01                     | 23.7     | 2.3      | 1.0     | 0.016  |
| si:ch211-202h22.6 | 558776  | si:ch211-202h22.6                                             | 2.48E-01                     | 6.84E-02                     | 23.8     | 1.3      | 0.6     | 0.016  |
| slc6a11           | 558960  | solute carrier family 6 (neurotransmitter transporter, GAB    | 8.62E-02                     | 2.27E-01                     | 3.3      | 4.0      | 3.6     | 0.016  |
| lct               | 559107  | lactase                                                       | 2.92E-02                     | 2.14E-01                     | 0.9      | 2.4      | 1.6     | 0.016  |
| whsc2             | 559677  | Wolf-Hirschhorn syndrome candidate 2                          | 2.41E-01                     | 7.68E-02                     | 14.7     | 15.7     | 15.2    | 0.016  |
| adipor2           | 560140  | adiponectin receptor 2                                        | 1.05E-01                     | 2.27E-01                     | 14.7     | 16.8     | 15.8    | 0.016  |
| zgc:123333        | 560778  | zgc:123333                                                    | 1.04E-01                     | 2.49E-01                     | 14.6     | 15.3     | 14.9    | 0.016  |
| slc1a2a           | 560802  | solute carrier family 1 (glial high affinity glutamate transp | 4.56E-05                     | 2.36E-01                     | 0.8      | 1.2      | 1.0     | 0.016  |
| LOC561083         | 561083  | gamma-aminobutyric acid receptor subunit rho-3-like           | 1.22E-01                     | 2.09E-01                     | 14.3     | 15.7     | 15.0    | 0.016  |
| pcdh17            | 561336  | protocadherin 17                                              | 1.88E-01                     | 2.16E-01                     | 18.5     | 17.8     | 18.2    | 0.016  |
| mepce             | 561384  | methylphosphate capping enzyme                                | 2.23E-01                     | 2.16E-02                     | 11.5     | 14.3     | 12.9    | 0.016  |

**Table S1: Zebrafish circadian oscillating genes**

| Gene Symbol        | Gene ID | Gene Description                                             | Fisher's g test p value (LD) | Fisher's g test p value (DD) | LD Phase | DD Phase | Phase * | FDR ** |
|--------------------|---------|--------------------------------------------------------------|------------------------------|------------------------------|----------|----------|---------|--------|
| ntn4               | 561440  | netrin 4                                                     | 6.83E-02                     | 2.15E-01                     | 15.7     | 18.0     | 16.9    | 0.016  |
| LOC562292          | 562292  | acyl-CoA synthetase family member 3, mitochondrial-like      | 2.43E-01                     | 8.27E-02                     | 2.0      | 2.7      | 2.4     | 0.016  |
| ppp2r5a            | 562460  | protein phosphatase 2, regulatory subunit B', alpha isofo    | 2.11E-01                     | 1.15E-01                     | 4.2      | 0.3      | 2.3     | 0.016  |
| si:dkey-8l13.4     | 562490  | si:dkey-8l13.4                                               | 1.70E-01                     | 2.04E-01                     | 13.8     | 16.3     | 15.1    | 0.016  |
| si:ch211-146l10.2  | 563215  | si:ch211-146l10.2                                            | 1.89E-01                     | 2.30E-01                     | 15.4     | 17.9     | 16.6    | 0.016  |
| si:ch211-239e6.4   | 563220  | si:ch211-239e6.4                                             | 1.43E-01                     | 2.37E-01                     | 0.5      | 1.5      | 1.0     | 0.016  |
| phf20a             | 563332  | PHD finger protein 20, a                                     | 2.01E-01                     | 6.41E-02                     | 12.8     | 13.5     | 13.2    | 0.016  |
| podxl              | 563365  | podocalyxin-like                                             | 1.42E-01                     | 2.03E-01                     | 2.7      | 3.3      | 3.0     | 0.016  |
| si:dkey-223d9.4    | 564291  | si:dkey-223d9.4                                              | 2.12E-03                     | 2.18E-01                     | 3.1      | 2.1      | 2.6     | 0.016  |
| psma3              | 564370  | proteasome (prosome, macropain) subunit, alpha type, 3       | 1.79E-02                     | 2.23E-01                     | 19.8     | 20.5     | 20.2    | 0.016  |
| si:rp71-56i13.6    | 564457  | si:rp71-56i13.6                                              | 1.43E-01                     | 2.01E-01                     | 14.2     | 16.7     | 15.5    | 0.016  |
| zgc:171480         | 564733  | zgc:171480                                                   | 3.49E-02                     | 2.13E-01                     | 0.3      | 1.7      | 1.0     | 0.016  |
| glsb               | 564746  | glutaminase b                                                | 8.48E-02                     | 2.40E-01                     | 12.3     | 11.6     | 11.9    | 0.016  |
| LOC564868          | 564868  | hypothetical LOC564868                                       | 2.20E-01                     | 1.53E-01                     | 15.5     | 17.2     | 16.4    | 0.016  |
| LOC564886          | 564886  | poly [ADP-ribose] polymerase 10-like                         | 3.99E-02                     | 2.02E-01                     | 15.2     | 17.2     | 16.2    | 0.016  |
| si:ch211-137i24.10 | 565274  | si:ch211-137i24.10                                           | 7.33E-02                     | 2.43E-01                     | 16.5     | 17.0     | 16.8    | 0.016  |
| LOC565335          | 565335  | novel protein similar to vertebrate solute carrier family 25 | 2.11E-01                     | 1.45E-01                     | 1.3      | 4.3      | 2.8     | 0.016  |
| prdm11             | 565473  | PR domain containing 11                                      | 1.05E-02                     | 2.36E-01                     | 17.5     | 17.0     | 17.3    | 0.016  |
| sat1a              | 565700  | spermidine/spermine N1-acetyltransferase 1a                  | 1.32E-01                     | 2.09E-01                     | 9.3      | 10.6     | 9.9     | 0.016  |
| LOC565776          | 565776  | sodium-dependent noradrenaline transporter-like              | 1.97E-01                     | 2.22E-01                     | 14.3     | 10.0     | 12.2    | 0.016  |
| zgc:112329         | 565852  | zgc:112329                                                   | 2.03E-01                     | 8.90E-02                     | 14.2     | 16.2     | 15.2    | 0.016  |
| btbd2              | 565970  | BTB (POZ) domain containing 2                                | 1.26E-01                     | 2.27E-01                     | 15.9     | 17.6     | 16.7    | 0.016  |
| terf1              | 566954  | telomeric repeat binding factor (NIMA-interacting) 1         | 2.40E-02                     | 2.07E-01                     | 5.9      | 5.6      | 5.7     | 0.016  |
| rif1               | 567001  | RAP1 interacting factor homolog (yeast)                      | 2.09E-01                     | 1.17E-01                     | 2.7      | 4.3      | 3.5     | 0.016  |
| taf1a              | 567105  | TATA box binding protein (TBP)-associated factor, RNA        | 1.42E-01                     | 2.06E-01                     | 23.5     | 2.7      | 1.1     | 0.016  |
| slc7a9             | 567117  | solute carrier family 7 (cationic amino acid transporter, y- | 1.73E-01                     | 2.27E-01                     | 20.5     | 23.7     | 22.1    | 0.016  |
| si:dkey-151c10.1   | 567639  | si:dkey-151c10.1                                             | 1.43E-01                     | 2.04E-01                     | 4.2      | 4.8      | 4.5     | 0.016  |
| zgc:171813         | 568203  | zgc:171813                                                   | 2.12E-01                     | 3.11E-03                     | 16.5     | 20.5     | 18.5    | 0.016  |
| cngb1a             | 568211  | cyclic nucleotide gated channel beta 1a                      | 2.01E-01                     | 3.06E-02                     | 14.5     | 15.0     | 14.8    | 0.016  |
| tmem135            | 568244  | transmembrane protein 135                                    | 2.14E-01                     | 1.90E-01                     | 0.7      | 2.5      | 1.6     | 0.016  |
| bcr                | 568320  | breakpoint cluster region                                    | 2.45E-01                     | 9.18E-02                     | 18.0     | 18.3     | 18.2    | 0.016  |

**Table S1: Zebrafish circadian oscillating genes**

| Gene Symbol       | Gene ID | Gene Description                                          | Fisher's g test p value (LD) | Fisher's g test p value (DD) | LD Phase | DD Phase | Phase * | FDR ** |
|-------------------|---------|-----------------------------------------------------------|------------------------------|------------------------------|----------|----------|---------|--------|
| sla2              | 568515  | Src-like-adaptor 2                                        | 1.78E-01                     | 2.48E-01                     | 15.7     | 18.2     | 17.0    | 0.016  |
| zgc:171755        | 568879  | zgc:171755                                                | 4.25E-02                     | 2.10E-01                     | 0.8      | 1.8      | 1.3     | 0.016  |
| plcd3a            | 569040  | phospholipase C, delta 3a                                 | 2.32E-01                     | 6.38E-02                     | 13.8     | 16.0     | 14.9    | 0.016  |
| si:dkey-46k9.12   | 569187  | si:dkey-46k9.12                                           | 2.02E-01                     | 9.29E-02                     | 14.2     | 16.6     | 15.4    | 0.016  |
| cln5              | 569407  | ceroid-lipofuscinosis, neuronal 5                         | 1.41E-02                     | 2.17E-01                     | 9.7      | 7.5      | 8.6     | 0.016  |
| tfb2m             | 569468  | transcription factor B2, mitochondrial                    | 1.16E-01                     | 2.49E-01                     | 18.5     | 20.2     | 19.4    | 0.016  |
| LOC569779         | 569779  | Heavy chain, Unconventional Myosin family member (hu      | 1.12E-01                     | 2.38E-01                     | 14.3     | 15.5     | 14.9    | 0.016  |
| aqp9b             | 570191  | aquaporin 9b                                              | 4.22E-02                     | 2.19E-01                     | 14.0     | 12.0     | 13.0    | 0.016  |
| zgc:114180        | 570333  | zgc:114180                                                | 2.38E-01                     | 6.70E-03                     | 18.8     | 16.2     | 17.5    | 0.016  |
| si:dkey-183n20.16 | 570437  | si:dkey-183n20.16                                         | 2.47E-01                     | 6.63E-04                     | 3.7      | 5.0      | 4.4     | 0.016  |
| zgc:153073        | 570830  | zgc:153073                                                | 6.63E-02                     | 2.35E-01                     | 13.5     | 16.0     | 14.8    | 0.016  |
| gnav1             | 571305  | guanine nucleotide binding protein (G protein) alpha v1   | 2.07E-01                     | 5.35E-02                     | 13.8     | 16.3     | 15.1    | 0.016  |
| zgc:73075         | 572207  | zgc:73075                                                 | 2.20E-01                     | 2.01E-02                     | 5.6      | 3.5      | 4.5     | 0.016  |
| zgc:152911        | 572245  | zgc:152911                                                | 9.68E-03                     | 2.42E-01                     | 2.8      | 2.8      | 2.8     | 0.016  |
| cx52.7            | 572278  | connexin 52.7                                             | 3.02E-02                     | 2.17E-01                     | 19.8     | 21.7     | 20.8    | 0.016  |
| cbx4              | 573110  | chromobox homolog 4 (Pc class homolog, Drosophila)        | 2.42E-01                     | 2.50E-01                     | 17.7     | 16.2     | 17.0    | 0.016  |
| LOC573743         | 573743  | similar to zinc finger and BTB domain containing 41       | 2.44E-01                     | 7.94E-02                     | 14.5     | 13.7     | 14.1    | 0.016  |
| dusp12            | 573998  | dual specificity phosphatase 12                           | 2.25E-01                     | 1.95E-01                     | 0.3      | 2.7      | 1.5     | 0.016  |
| zgc:109809        | 664743  | zgc:109809                                                | 8.77E-02                     | 2.43E-01                     | 15.2     | 15.2     | 15.2    | 0.016  |
| cldn15b           | 678556  | claudin 15b                                               | 2.05E-01                     | 5.77E-02                     | 20.0     | 20.8     | 20.4    | 0.016  |
| alg5              | 751635  | asparagine-linked glycosylation 5 homolog (yeast, dolich  | 1.50E-01                     | 2.01E-01                     | 23.0     | 0.7      | 23.9    | 0.016  |
| fam169aa          | 751650  | family with sequence similarity 169, member Aa            | 1.13E-01                     | 2.39E-01                     | 5.3      | 4.5      | 4.9     | 0.016  |
| eml1              | 767643  | echinoderm microtubule associated protein like 1          | 3.75E-03                     | 2.24E-01                     | 22.7     | 23.5     | 23.1    | 0.016  |
| zgc:153372        | 767695  | zgc:153372                                                | 4.38E-03                     | 2.04E-01                     | 16.5     | 18.0     | 17.3    | 0.016  |
| znrf2             | 767761  | zinc and ring finger 2                                    | 1.10E-01                     | 2.37E-01                     | 2.0      | 4.5      | 3.3     | 0.016  |
| zgc:153041        | 768161  | zgc:153041                                                | 2.39E-01                     | 1.99E-01                     | 3.8      | 5.3      | 4.6     | 0.016  |
| rilpl1            | 780843  | Rab interacting lysosomal protein-like 1                  | 2.48E-01                     | 6.52E-02                     | 16.9     | 18.3     | 17.6    | 0.016  |
| loxl2b            | 791144  | lysyl oxidase-like 2b                                     | 2.27E-01                     | 6.51E-02                     | 2.5      | 3.0      | 2.7     | 0.016  |
| slco2b1           | 792084  | solute carrier organic anion transporter family, member 2 | 4.71E-02                     | 2.33E-01                     | 13.8     | 15.1     | 14.4    | 0.016  |
| si:dkey-126g1.9   | 792999  | si:dkey-126g1.9                                           | 2.00E-01                     | 1.38E-01                     | 10.8     | 10.0     | 10.4    | 0.016  |
| LOC793259         | 793259  | hypothetical protein LOC793259                            | 2.15E-01                     | 1.28E-01                     | 9.7      | 9.7      | 9.7     | 0.016  |

**Table S1: Zebrafish circadian oscillating genes**

| Gene Symbol       | Gene ID   | Gene Description                                           | Fisher's g test p value (LD) | Fisher's g test p value (DD) | LD Phase | DD Phase | Phase * | FDR ** |
|-------------------|-----------|------------------------------------------------------------|------------------------------|------------------------------|----------|----------|---------|--------|
| lbx1b             | 793810    | ladybird homeobox 1b                                       | 7.73E-02                     | 2.02E-01                     | 13.2     | 15.4     | 14.3    | 0.016  |
| LOC794117         | 794117    | similar to Ring finger protein 14                          | 1.38E-02                     | 2.40E-01                     | 5.0      | 5.3      | 5.1     | 0.016  |
| slc22a7a          | 794188    | solute carrier family 22 (organic anion transporter), meml | 2.23E-01                     | 2.48E-01                     | 4.7      | 4.7      | 4.7     | 0.016  |
| si:ch211-202f5.3  | 795321    | si:ch211-202f5.3                                           | 2.18E-01                     | 1.34E-01                     | 0.3      | 2.2      | 1.3     | 0.016  |
| slc16a9a          | 795588    | solute carrier family 16 (monocarboxylic acid transporter) | 2.04E-01                     | 5.42E-02                     | 5.5      | 5.3      | 5.4     | 0.016  |
| smc6              | 797304    | structural maintenance of chromosomes 6                    | 3.54E-02                     | 2.46E-01                     | 12.5     | 16.2     | 14.4    | 0.016  |
| si:dkey-224e22.3  | 797513    | si:dkey-224e22.3                                           | 2.38E-01                     | 6.71E-02                     | 1.5      | 2.7      | 2.1     | 0.016  |
| tpp1              | 798347    | tripeptidyl peptidase I                                    | 6.17E-02                     | 2.36E-01                     | 14.8     | 17.7     | 16.3    | 0.016  |
| si:ch211-217k17.9 | 798921    | si:ch211-217k17.9                                          | 2.23E-02                     | 2.16E-01                     | 1.7      | 4.2      | 3.0     | 0.016  |
| anxa2b            | 799806    | annexin A2b                                                | 2.26E-01                     | 1.67E-03                     | 3.0      | 4.1      | 3.5     | 0.016  |
| LOC10000576       | 10000576  | ATP-binding cassette, sub-family F, member 2-like          | 1.64E-02                     | 2.31E-01                     | 3.2      | 2.3      | 2.8     | 0.016  |
| zgc:162060        | 100001158 | zgc:162060                                                 | 2.16E-01                     | 4.22E-02                     | 5.5      | 6.5      | 6.0     | 0.016  |
| ifitm1            | 100003209 | interferon induced transmembrane protein 1 (9-27)          | 2.16E-01                     | 7.77E-02                     | 5.2      | 4.3      | 4.8     | 0.016  |
| LOC100004809      | 100004809 | protein FAM78B-like                                        | 2.41E-01                     | 8.26E-02                     | 20.3     | 19.0     | 19.7    | 0.016  |
| pcdh10            | 100006777 | protocadherin 10                                           | 4.90E-02                     | 2.10E-01                     | 16.8     | 16.3     | 16.6    | 0.016  |
| pcp411            | 100008021 | Purkinje cell protein 4 like 1                             | 2.54E-03                     | 2.21E-01                     | 15.3     | 13.3     | 14.3    | 0.016  |
| klhl32            | 100009653 | kelch-like 32 (Drosophila)                                 | 2.04E-01                     | 1.94E-01                     | 13.2     | 14.0     | 13.6    | 0.016  |
| pat1              | 100009659 | protein associated with topoisomerase II homolog 1 (yea    | 1.60E-02                     | 2.26E-01                     | 14.7     | 16.7     | 15.7    | 0.016  |
| atg9a             | 100009663 | ATG9 autophagy related 9 homolog A (S. cerevisiae)         | 1.85E-01                     | 2.41E-01                     | 11.2     | 16.2     | 13.7    | 0.016  |
| rhcga             | 100038797 | Rhesus blood group, C glycoprotein a                       | 1.08E-01                     | 2.08E-01                     | 2.3      | 3.4      | 2.8     | 0.016  |
| zgc:162641        | 100093708 | zgc:162641                                                 | 2.57E-02                     | 2.03E-01                     | 15.0     | 16.2     | 15.6    | 0.016  |
| tm2d1             | 100093710 | TM2 domain containing 1                                    | 9.12E-03                     | 2.38E-01                     | 16.7     | 18.0     | 17.4    | 0.016  |
| zgc:165582        | 100124609 | zgc:165582                                                 | 2.49E-01                     | 1.96E-01                     | 18.2     | 19.3     | 18.8    | 0.016  |
| ebi3              | 100134974 | Epstein-Barr virus induced gene 3                          | 2.04E-01                     | 6.03E-02                     | 1.8      | 3.5      | 2.6     | 0.016  |
| fbxw8             | 100136859 | F-box and WD repeat domain containing 8                    | 5.06E-02                     | 2.28E-01                     | 15.5     | 17.2     | 16.4    | 0.016  |
| zgc:173713        | 100137115 | zgc:173713                                                 | 2.24E-02                     | 2.16E-01                     | 9.7      | 13.3     | 11.5    | 0.016  |
| lysmd4            | 100149102 | LysM, putative peptidoglycan-binding, domain containing    | 2.39E-02                     | 2.37E-01                     | 6.5      | 5.5      | 6.0     | 0.016  |
| si:dkey-69o16.5   | 100149419 | si:dkey-69o16.5                                            | 2.11E-01                     | 1.68E-01                     | 6.7      | 9.3      | 8.0     | 0.016  |
| si:dkey-211e20.10 | 100329583 | si:dkey-211e20.10                                          | 3.72E-02                     | 2.21E-01                     | 20.5     | 22.7     | 21.6    | 0.016  |
| LOC100329779      | 100329779 | rho-associated protein kinase 1-like                       | 1.56E-01                     | 2.09E-01                     | 18.8     | 18.0     | 18.4    | 0.016  |
| arfgef1           | 100329953 | ADP-ribosylation factor guanine nucleotide-exchange fac    | 9.96E-02                     | 2.47E-01                     | 17.9     | 17.3     | 17.6    | 0.016  |



**Table S1: Zebrafish circadian oscillating genes**

| Gene Symbol  | Gene ID   | Gene Description                                         | Fisher's g test p value (LD) | Fisher's g test p value (DD) | LD Phase | DD Phase | Phase * | FDR ** |
|--------------|-----------|----------------------------------------------------------|------------------------------|------------------------------|----------|----------|---------|--------|
| LOC100330595 | 100330595 | hypothetical protein LOC100330595                        | 2.29E-01                     | 2.43E-01                     | 3.3      | 3.5      | 3.4     | 0.016  |
| LOC100332307 | 100332307 | crossover junction endonuclease EME1-like                | 9.53E-02                     | 2.36E-01                     | 13.7     | 16.2     | 15.0    | 0.016  |
| mpp5b        | 100422734 | membrane protein, palmitoylated 5b (MAGUK p55 subfa      | 2.05E-01                     | 2.43E-01                     | 19.2     | 16.0     | 17.6    | 0.016  |
| mitfa        | 30080     | microphthalmia-associated transcription factor a         | 1.43E-03                     | 2.78E-01                     | 20.3     | 22.9     | 21.6    | 0.022  |
| cdh2         | 30291     | cadherin 2, neuronal                                     | 2.91E-01                     | 9.32E-02                     | 16.8     | 16.0     | 16.4    | 0.022  |
| foxo3b       | 30296     | forkhead box O3b                                         | 1.42E-01                     | 2.65E-01                     | 11.2     | 13.7     | 12.5    | 0.022  |
| tcf3         | 30310     | transcription factor 3                                   | 4.52E-02                     | 2.95E-01                     | 13.0     | 12.8     | 12.9    | 0.022  |
| hsp90ab1     | 30573     | heat shock protein 90, alpha (cytosolic), class B member | 8.32E-02                     | 2.61E-01                     | 15.8     | 17.5     | 16.7    | 0.022  |
| ppm1aa       | 30704     | protein phosphatase, Mg2+/Mn2+ dependent, 1Aa            | 2.38E-01                     | 2.66E-01                     | 18.8     | 17.7     | 18.3    | 0.022  |
| robo1        | 30769     | roundabout homolog 1                                     | 2.53E-01                     | 9.15E-02                     | 20.0     | 22.0     | 21.0    | 0.022  |
| copz2        | 57969     | zeta2-cop                                                | 1.71E-02                     | 2.50E-01                     | 6.8      | 6.2      | 6.5     | 0.022  |
| pim1         | 58054     | pim-1 oncogene                                           | 1.67E-01                     | 2.83E-01                     | 10.5     | 14.0     | 12.3    | 0.022  |
| slc34a2a     | 58148     | solute carrier family 34 (sodium phosphate), member 2a   | 6.08E-02                     | 2.60E-01                     | 21.0     | 22.5     | 21.8    | 0.022  |
| fech         | 58215     | ferrochelatase                                           | 4.99E-02                     | 2.79E-01                     | 6.8      | 1.5      | 4.2     | 0.022  |
| gstp1        | 79381     | glutathione S-transferase pi                             | 2.76E-01                     | 2.78E-01                     | 7.3      | 8.2      | 7.8     | 0.022  |
| crx          | 81881     | cone-rod homeobox                                        | 2.60E-01                     | 4.35E-02                     | 17.3     | 15.9     | 16.6    | 0.022  |
| jag2         | 140422    | jagged 2                                                 | 7.09E-02                     | 2.95E-01                     | 17.5     | 17.3     | 17.4    | 0.022  |
| per2         | 140633    | period homolog 2 (Drosophila)                            | 2.24E-02                     | 2.83E-01                     | 6.3      | 8.7      | 7.5     | 0.022  |
| ptk2.1       | 142986    | protein tyrosine kinase 2a                               | 2.98E-01                     | 7.55E-02                     | 12.0     | 16.0     | 14.0    | 0.022  |
| mcm2         | 192338    | MCM2 minichromosome maintenance deficient 2, mitotir     | 1.66E-01                     | 2.65E-01                     | 2.3      | 3.7      | 3.0     | 0.022  |
| fmr1         | 259191    | fragile X mental retardation 1                           | 1.23E-01                     | 2.60E-01                     | 19.2     | 18.6     | 18.9    | 0.022  |
| drd3         | 282554    | dopamine receptor D3                                     | 4.50E-02                     | 2.74E-01                     | 12.2     | 14.0     | 13.1    | 0.022  |
| sly1         | 317732    | suppressor of ypt1                                       | 2.94E-01                     | 9.53E-03                     | 21.5     | 19.5     | 20.5    | 0.022  |
| hmgb1a       | 321622    | high-mobility group box 1a                               | 1.67E-01                     | 2.83E-01                     | 17.3     | 18.2     | 17.8    | 0.022  |
| wwp1         | 321695    | WW domain containing E3 ubiquitin protein ligase 1       | 2.78E-01                     | 2.19E-01                     | 17.5     | 19.0     | 18.3    | 0.022  |
| apoa4        | 322543    | apolipoprotein A-IV                                      | 2.68E-01                     | 5.65E-02                     | 7.2      | 8.0      | 7.6     | 0.022  |
| mid1ip1      | 322977    | MID1 interacting protein 1                               | 2.01E-03                     | 2.75E-01                     | 3.7      | 3.7      | 3.7     | 0.022  |
| ell2         | 322997    | elongation factor, RNA polymerase II, 2                  | 1.41E-02                     | 2.60E-01                     | 2.8      | 3.3      | 3.0     | 0.022  |
| wu:fb93d04   | 323251    | wu:fb93d04                                               | 3.11E-02                     | 2.59E-01                     | 10.0     | 11.5     | 10.8    | 0.022  |
| tia1l        | 323447    | cytotoxic granule-associated RNA binding protein 1, like | 2.32E-01                     | 2.65E-01                     | 23.4     | 1.9      | 0.6     | 0.022  |
| metap2       | 323452    | methionyl aminopeptidase 2                               | 1.73E-01                     | 2.63E-01                     | 3.5      | 22.7     | 1.1     | 0.022  |

**Table S1: Zebrafish circadian oscillating genes**

| Gene Symbol | Gene ID | Gene Description                                           | Fisher's g test p value (LD) | Fisher's g test p value (DD) | LD Phase | DD Phase | Phase * | FDR ** |
|-------------|---------|------------------------------------------------------------|------------------------------|------------------------------|----------|----------|---------|--------|
| dbr1        | 323746  | debranching enzyme homolog 1 (S. cerevisiae)               | 1.40E-01                     | 2.87E-01                     | 2.5      | 4.2      | 3.4     | 0.022  |
| c20orf14    | 323855  | c20orf14 homolog (H. sapiens)                              | 9.20E-02                     | 2.78E-01                     | 17.5     | 18.2     | 17.9    | 0.022  |
| foxk2       | 324141  | forkhead box K2                                            | 3.42E-03                     | 2.84E-01                     | 18.8     | 18.7     | 18.8    | 0.022  |
| tax1bp1b    | 324152  | Tax1 (human T-cell leukemia virus type I) binding proteir  | 6.94E-02                     | 2.89E-01                     | 14.0     | 16.0     | 15.0    | 0.022  |
| wu:fc31e09  | 324521  | wu:fc31e09                                                 | 2.59E-01                     | 2.52E-01                     | 22.2     | 23.3     | 22.8    | 0.022  |
| taldo1      | 324556  | transaldolase 1                                            | 2.69E-01                     | 1.73E-01                     | 3.5      | 3.0      | 3.3     | 0.022  |
| ogfod1      | 324573  | 2-oxoglutarate and iron-dependent oxygenase domain c       | 1.68E-01                     | 2.67E-01                     | 23.5     | 3.3      | 1.4     | 0.022  |
| tsr1        | 325037  | TSR1, 20S rRNA accumulation, homolog (yeast)               | 1.23E-01                     | 2.52E-01                     | 23.3     | 1.5      | 0.4     | 0.022  |
| wu:fc55e03  | 325104  | wu:fc55e03                                                 | 2.96E-01                     | 1.32E-01                     | 13.0     | 16.2     | 14.6    | 0.022  |
| rca3        | 325356  | regulator of calcineurin family member 3                   | 2.91E-01                     | 5.73E-02                     | 12.2     | 14.8     | 13.5    | 0.022  |
| polr1b      | 325603  | polymerase (RNA) I polypeptide B                           | 8.86E-02                     | 2.66E-01                     | 21.3     | 23.6     | 22.4    | 0.022  |
| tsku        | 325958  | tsukushi small leucine rich proteoglycan homolog (Xenopus) | 5.62E-03                     | 2.94E-01                     | 5.0      | 4.5      | 4.8     | 0.022  |
| zgc:56622   | 326033  | zgc:56622                                                  | 3.50E-02                     | 2.80E-01                     | 20.2     | 21.6     | 20.9    | 0.022  |
| mg:cb01g09  | 326964  | mg:cb01g09                                                 | 4.05E-04                     | 2.67E-01                     | 3.2      | 3.2      | 3.2     | 0.022  |
| micall2a    | 327198  | mical-like 2a                                              | 2.53E-02                     | 2.97E-01                     | 14.0     | 15.5     | 14.8    | 0.022  |
| cndp2       | 327288  | CNDP dipeptidase 2 (metallopeptidase M20 family)           | 1.77E-01                     | 2.80E-01                     | 3.3      | 4.7      | 4.0     | 0.022  |
| zgc:123170  | 334107  | zgc:123170                                                 | 2.67E-01                     | 5.62E-03                     | 21.0     | 0.8      | 22.9    | 0.022  |
| slc43a1a    | 334395  | solute carrier family 43, member 1a                        | 2.65E-01                     | 1.53E-01                     | 22.7     | 13.0     | 17.8    | 0.022  |
| rdh14b      | 334665  | retinol dehydrogenase 14b (all-trans/9-cis/11-cis)         | 2.66E-01                     | 1.64E-01                     | 14.2     | 16.8     | 15.5    | 0.022  |
| wu:fa04a09  | 334800  | wu:fa04a09                                                 | 1.42E-01                     | 2.58E-01                     | 15.2     | 17.3     | 16.3    | 0.022  |
| rogdi       | 335642  | rogdi homolog (Drosophila)                                 | 3.78E-02                     | 2.74E-01                     | 14.7     | 19.0     | 16.9    | 0.022  |
| zgc:56683   | 336470  | zgc:56683                                                  | 1.42E-01                     | 2.88E-01                     | 23.3     | 1.3      | 0.3     | 0.022  |
| drg1        | 336823  | developmentally regulated GTP binding protein 1            | 3.43E-02                     | 2.52E-01                     | 23.3     | 2.2      | 0.8     | 0.022  |
| ranbp1      | 337046  | RAN binding protein 1                                      | 2.52E-01                     | 1.71E-01                     | 0.9      | 4.9      | 2.9     | 0.022  |
| gpx4a       | 352928  | glutathione peroxidase 4a                                  | 5.60E-02                     | 2.67E-01                     | 11.6     | 14.8     | 13.2    | 0.022  |
| gtpbp1      | 378721  | GTP binding protein 1                                      | 5.71E-02                     | 2.68E-01                     | 14.0     | 16.3     | 15.2    | 0.022  |
| arf5        | 378724  | ADP-ribosylation factor 5                                  | 6.77E-02                     | 2.85E-01                     | 0.3      | 0.3      | 0.3     | 0.022  |
| zgc:110586  | 378854  | zgc:110586                                                 | 1.93E-01                     | 2.86E-01                     | 14.3     | 15.0     | 14.6    | 0.022  |
| ncf1        | 378966  | neutrophil cytosolic factor 1                              | 3.18E-02                     | 2.80E-01                     | 15.5     | 15.8     | 15.7    | 0.022  |
| wu:fb57e05  | 386954  | wu:fb57e05                                                 | 2.88E-01                     | 1.36E-01                     | 18.4     | 21.3     | 19.8    | 0.022  |
| scarb1      | 387260  | scavenger receptor class B, member 1                       | 8.34E-02                     | 2.78E-01                     | 14.7     | 16.3     | 15.5    | 0.022  |

**Table S1: Zebrafish circadian oscillating genes**

| Gene Symbol | Gene ID | Gene Description                                              | Fisher's g test p value (LD) | Fisher's g test p value (DD) | LD Phase | DD Phase | Phase * | FDR ** |
|-------------|---------|---------------------------------------------------------------|------------------------------|------------------------------|----------|----------|---------|--------|
| cpne3       | 393136  | copine III                                                    | 7.50E-02                     | 2.95E-01                     | 6.5      | 5.3      | 5.9     | 0.022  |
| usf1        | 393266  | upstream transcription factor 1                               | 5.48E-02                     | 2.89E-01                     | 12.5     | 13.8     | 13.2    | 0.022  |
| hsd11b3a    | 393293  | hydroxysteroid (11-beta) dehydrogenase 3a                     | 2.16E-02                     | 2.99E-01                     | 3.4      | 2.6      | 3.0     | 0.022  |
| wipi1       | 393362  | WD repeat domain, phosphoinositide interacting 1              | 2.64E-01                     | 9.39E-02                     | 13.0     | 15.7     | 14.4    | 0.022  |
| dnajc5gb    | 393371  | DnaJ (Hsp40) homolog, subfamily C, member 5 gamma             | 2.72E-01                     | 7.05E-02                     | 2.0      | 21.3     | 23.7    | 0.022  |
| tmem206     | 393429  | transmembrane protein 206                                     | 2.87E-01                     | 2.47E-01                     | 15.2     | 19.2     | 17.2    | 0.022  |
| pfdn6       | 393485  | prefoldin subunit 6                                           | 2.54E-01                     | 1.40E-01                     | 1.2      | 2.8      | 2.0     | 0.022  |
| slc39a10    | 393644  | solute carrier family 39 (zinc transporter), member 10        | 1.40E-01                     | 2.62E-01                     | 1.0      | 3.7      | 2.4     | 0.022  |
| exosc4      | 393712  | exosome component 4                                           | 1.18E-01                     | 2.75E-01                     | 0.8      | 2.0      | 1.4     | 0.022  |
| zgc:73238   | 393731  | zgc:73238                                                     | 3.35E-02                     | 2.53E-01                     | 1.6      | 1.9      | 1.7     | 0.022  |
| zgc:73336   | 393767  | zgc:73336                                                     | 1.32E-01                     | 2.57E-01                     | 11.9     | 14.2     | 13.1    | 0.022  |
| myoz2b      | 393828  | myozenin 2b                                                   | 2.63E-01                     | 2.95E-02                     | 2.8      | 3.5      | 3.2     | 0.022  |
| ptdss1      | 393931  | phosphatidylserine synthase 1                                 | 1.26E-01                     | 2.82E-01                     | 18.6     | 20.8     | 19.7    | 0.022  |
| zgc:55733   | 393968  | zgc:55733                                                     | 3.56E-03                     | 2.78E-01                     | 15.4     | 18.3     | 16.9    | 0.022  |
| rnf11       | 393996  | ring finger protein 11                                        | 2.22E-01                     | 2.60E-01                     | 12.8     | 15.5     | 14.2    | 0.022  |
| srp9        | 394071  | signal recognition particle 9                                 | 3.94E-02                     | 2.86E-01                     | 2.7      | 3.3      | 3.0     | 0.022  |
| asns        | 394138  | asparagine synthetase                                         | 3.04E-02                     | 2.84E-01                     | 0.5      | 1.7      | 1.1     | 0.022  |
| dnaja3b     | 394242  | DnaJ (Hsp40) homolog, subfamily A, member 3B                  | 1.23E-02                     | 2.60E-01                     | 2.7      | 4.2      | 3.5     | 0.022  |
| pafah1b1a   | 394246  | platelet-activating factor acetylhydrolase, isoform Ib, alpha | 2.51E-01                     | 1.69E-02                     | 16.0     | 16.7     | 16.4    | 0.022  |
| myo3a       | 402814  | myosin IIIA                                                   | 1.49E-02                     | 2.94E-01                     | 3.8      | 2.2      | 3.0     | 0.022  |
| zgc:77234   | 402970  | zgc:77234                                                     | 2.31E-01                     | 2.74E-01                     | 13.2     | 16.2     | 14.7    | 0.022  |
| myd88       | 403145  | myeloid differentiation primary response gene (88)            | 2.35E-01                     | 2.51E-01                     | 14.2     | 18.4     | 16.3    | 0.022  |
| zgc:55936   | 404050  | zgc:55936                                                     | 1.07E-01                     | 2.54E-01                     | 12.7     | 16.2     | 14.5    | 0.022  |
| itgb1b.2    | 405864  | integrin, beta 1b.2                                           | 2.71E-01                     | 7.39E-02                     | 7.8      | 11.0     | 9.4     | 0.022  |
| xpnpep1     | 406253  | X-prolyl aminopeptidase (aminopeptidase P) 1, soluble         | 2.78E-02                     | 2.58E-01                     | 6.1      | 7.5      | 6.8     | 0.022  |
| hprt1       | 406259  | hypoxanthine phosphoribosyltransferase 1                      | 1.02E-01                     | 2.70E-01                     | 0.3      | 2.8      | 1.5     | 0.022  |
| uhf1        | 406350  | ubiquitin-like, containing PHD and RING finger domains,       | 2.78E-01                     | 2.28E-01                     | 3.7      | 4.8      | 4.3     | 0.022  |
| tmbim4      | 406412  | transmembrane BAX inhibitor motif containing 4                | 2.39E-01                     | 2.91E-01                     | 20.3     | 19.8     | 20.1    | 0.022  |
| atf4b1      | 406514  | activating transcription factor 4b1 (tax-responsive enhancer) | 2.78E-01                     | 2.03E-02                     | 14.5     | 17.0     | 15.8    | 0.022  |
| ttyh2l      | 406540  | tweety homolog 2, like                                        | 5.28E-03                     | 2.66E-01                     | 14.2     | 15.5     | 14.9    | 0.022  |
| ctsba       | 406645  | cathepsin B, a                                                | 2.93E-02                     | 2.87E-01                     | 15.5     | 18.0     | 16.8    | 0.022  |

**Table S1: Zebrafish circadian oscillating genes**

| Gene Symbol      | Gene ID | Gene Description                                            | Fisher's g test p value (LD) | Fisher's g test p value (DD) | LD Phase | DD Phase | Phase * | FDR ** |
|------------------|---------|-------------------------------------------------------------|------------------------------|------------------------------|----------|----------|---------|--------|
| ddc              | 406651  | dopa decarboxylase                                          | 5.36E-03                     | 2.97E-01                     | 1.1      | 2.9      | 2.0     | 0.022  |
| slc25a22         | 406717  | solute carrier family 25 (mitochondrial carrier: glutamate) | 1.13E-03                     | 2.86E-01                     | 12.7     | 16.3     | 14.5    | 0.022  |
| maf1             | 406750  | MAF1 homolog (S. cerevisiae)                                | 8.46E-02                     | 2.88E-01                     | 12.8     | 12.0     | 12.4    | 0.022  |
| adipor1b         | 406821  | adiponectin receptor 1b                                     | 4.41E-02                     | 2.89E-01                     | 14.2     | 16.7     | 15.5    | 0.022  |
| msh2             | 406845  | mutS homolog 2 (E. coli)                                    | 2.68E-01                     | 2.03E-01                     | 4.4      | 5.3      | 4.8     | 0.022  |
| si:ch211-102c2.6 | 407646  | si:ch211-102c2.6                                            | 2.94E-01                     | 2.80E-02                     | 17.3     | 17.2     | 17.3    | 0.022  |
| znf598           | 407728  | zinc finger protein 598                                     | 1.28E-01                     | 2.59E-01                     | 8.1      | 1.9      | 5.0     | 0.022  |
| tcf12            | 407985  | transcription factor 12                                     | 2.46E-01                     | 2.87E-01                     | 13.5     | 14.0     | 13.8    | 0.022  |
| zgc:92710        | 436669  | zgc:92710                                                   | 2.93E-01                     | 2.94E-01                     | 16.7     | 15.5     | 16.1    | 0.022  |
| pdha1b           | 436672  | pyruvate dehydrogenase (lipoamide) alpha 1b                 | 6.25E-03                     | 2.86E-01                     | 0.3      | 23.5     | 23.9    | 0.022  |
| mrpl24           | 436674  | mitochondrial ribosomal protein L24                         | 1.44E-01                     | 2.99E-01                     | 0.8      | 2.8      | 1.8     | 0.022  |
| tspan18b         | 436712  | tetraspanin 18b                                             | 8.67E-02                     | 2.54E-01                     | 14.3     | 13.3     | 13.8    | 0.022  |
| zgc:92827        | 436781  | zgc:92827                                                   | 3.66E-03                     | 2.60E-01                     | 17.3     | 19.7     | 18.5    | 0.022  |
| rnd3b            | 436864  | Rho family GTPase 3b                                        | 1.20E-03                     | 2.91E-01                     | 16.5     | 19.5     | 18.0    | 0.022  |
| kctd9            | 437011  | potassium channel tetramerisation domain containing 9       | 5.23E-02                     | 2.53E-01                     | 15.0     | 15.2     | 15.1    | 0.022  |
| bag3             | 445139  | BCL2-associated athanogene 3                                | 2.86E-01                     | 1.75E-01                     | 1.0      | 23.0     | 0.0     | 0.022  |
| zgc:103678       | 447924  | zgc:103678                                                  | 2.66E-01                     | 1.17E-01                     | 23.8     | 22.2     | 23.0    | 0.022  |
| pip5k1b          | 449831  | phosphatidylinositol-4-phosphate 5-kinase, type I, beta     | 1.03E-03                     | 2.92E-01                     | 4.7      | 3.0      | 3.9     | 0.022  |
| zgc:101814       | 450027  | zgc:101814                                                  | 7.02E-02                     | 2.90E-01                     | 23.5     | 1.2      | 0.4     | 0.022  |
| zgc:101768       | 450034  | zgc:101768                                                  | 4.46E-02                     | 2.78E-01                     | 23.0     | 0.8      | 23.9    | 0.022  |
| angptl7          | 450053  | angiopoietin-like 7                                         | 9.38E-02                     | 2.67E-01                     | 2.8      | 2.3      | 2.6     | 0.022  |
| hsd17b10         | 450078  | hydroxysteroid (17-beta) dehydrogenase 10                   | 1.77E-03                     | 2.65E-01                     | 4.0      | 4.8      | 4.4     | 0.022  |
| zgc:92172        | 492353  | zgc:92172                                                   | 2.55E-01                     | 1.16E-01                     | 10.0     | 7.8      | 8.9     | 0.022  |
| cab39l           | 492361  | calcium binding protein 39-like                             | 2.99E-01                     | 2.32E-01                     | 16.7     | 10.7     | 13.7    | 0.022  |
| dennd2d          | 492474  | DENN/MADD domain containing 2D                              | 3.00E-01                     | 2.67E-01                     | 16.5     | 17.8     | 17.2    | 0.022  |
| slc25a44a        | 492478  | solute carrier family 25, member 44 a                       | 1.79E-02                     | 2.81E-01                     | 23.7     | 23.8     | 23.8    | 0.022  |
| wdfy2            | 492636  | WD repeat and FYVE domain containing 2                      | 2.64E-02                     | 2.85E-01                     | 13.9     | 17.0     | 15.4    | 0.022  |
| im:7151270       | 492704  | im:7151270                                                  | 4.73E-03                     | 2.95E-01                     | 16.0     | 16.5     | 16.3    | 0.022  |
| zgc:101553       | 492778  | zgc:101553                                                  | 2.51E-01                     | 1.19E-01                     | 15.0     | 16.5     | 15.8    | 0.022  |
| zgc:101653       | 492800  | zgc:101653                                                  | 1.50E-01                     | 2.90E-01                     | 14.3     | 16.2     | 15.3    | 0.022  |
| farsb            | 493608  | phenylalanyl-tRNA synthetase, beta subunit                  | 2.69E-01                     | 2.25E-01                     | 18.4     | 18.9     | 18.6    | 0.022  |

**Table S1: Zebrafish circadian oscillating genes**

| Gene Symbol       | Gene ID | Gene Description                                            | Fisher's g test p value (LD) | Fisher's g test p value (DD) | LD Phase | DD Phase | Phase * | FDR ** |
|-------------------|---------|-------------------------------------------------------------|------------------------------|------------------------------|----------|----------|---------|--------|
| drd4b             | 503565  | dopamine receptor D4b                                       | 2.03E-03                     | 2.82E-01                     | 7.5      | 9.7      | 8.6     | 0.022  |
| mybpc2b           | 541384  | myosin binding protein C, fast type b                       | 5.09E-02                     | 2.92E-01                     | 14.7     | 17.5     | 16.1    | 0.022  |
| xpc               | 541386  | xeroderma pigmentosum, complementation group C              | 8.62E-02                     | 2.96E-01                     | 5.0      | 5.2      | 5.1     | 0.022  |
| zgc:113071        | 541520  | zgc:113071                                                  | 4.36E-03                     | 2.87E-01                     | 15.3     | 17.5     | 16.4    | 0.022  |
| zgc:110113        | 550236  | zgc:110113                                                  | 2.81E-01                     | 2.89E-01                     | 3.2      | 4.5      | 3.9     | 0.022  |
| zgc:110239        | 550326  | zgc:110239                                                  | 1.10E-02                     | 2.87E-01                     | 15.7     | 15.3     | 15.5    | 0.022  |
| phyh              | 550521  | phytanoyl-CoA 2-hydroxylase                                 | 1.43E-01                     | 2.68E-01                     | 8.3      | 7.7      | 8.0     | 0.022  |
| stk11             | 550537  | serine/threonine kinase 11                                  | 5.34E-02                     | 2.59E-01                     | 18.7     | 17.8     | 18.3    | 0.022  |
| zgc:110176        | 550539  | zgc:110176                                                  | 1.91E-03                     | 2.92E-01                     | 21.7     | 0.5      | 23.1    | 0.022  |
| ift140            | 553213  | intraflagellar transport 140 homolog (Chlamydomonas)        | 2.51E-01                     | 1.23E-01                     | 10.7     | 17.3     | 14.0    | 0.022  |
| EIF4Ba            | 553214  | eukaryotic translation initiation factor 4Ba                | 1.59E-01                     | 2.86E-01                     | 1.2      | 19.7     | 22.5    | 0.022  |
| si:dkey-58f10.1   | 553284  | si:dkey-58f10.1                                             | 9.34E-02                     | 2.63E-01                     | 0.8      | 1.7      | 1.3     | 0.022  |
| si:ch211-173p18.3 | 553317  | si:ch211-173p18.3                                           | 2.56E-01                     | 6.09E-02                     | 13.5     | 14.2     | 13.9    | 0.022  |
| COL4A3            | 553354  | collagen, type IV, alpha 3                                  | 7.36E-02                     | 2.76E-01                     | 14.2     | 17.5     | 15.9    | 0.022  |
| zgc:152774        | 553526  | zgc:152774                                                  | 2.70E-01                     | 5.26E-02                     | 14.8     | 15.7     | 15.3    | 0.022  |
| alg3              | 553725  | asparagine-linked glycosylation 3 homolog (S. cerevisiae)   | 1.86E-02                     | 2.59E-01                     | 21.5     | 0.3      | 22.9    | 0.022  |
| map3k7            | 553788  | mitogen activated protein kinase kinase kinase 7            | 1.48E-01                     | 2.72E-01                     | 19.7     | 18.0     | 18.9    | 0.022  |
| myh11a            | 554168  | myosin, heavy polypeptide 11, smooth muscle a               | 2.02E-01                     | 2.91E-01                     | 4.0      | 5.0      | 4.5     | 0.022  |
| orc1              | 554509  | origin recognition complex, subunit 1                       | 1.87E-01                     | 2.60E-01                     | 3.5      | 5.0      | 4.3     | 0.022  |
| ubn2              | 555525  | ubiquitin 2                                                 | 2.24E-01                     | 2.54E-01                     | 14.7     | 16.7     | 15.7    | 0.022  |
| bmpr2b            | 555655  | bone morphogenetic protein receptor, type II b (serine/thr) | 2.51E-01                     | 8.91E-02                     | 15.5     | 12.0     | 13.8    | 0.022  |
| wu:fi41d10        | 556702  | wu:fi41d10                                                  | 2.93E-02                     | 2.67E-01                     | 21.5     | 23.2     | 22.4    | 0.022  |
| ankrd13a          | 556837  | ankyrin repeat domain 13A                                   | 1.24E-01                     | 2.56E-01                     | 13.6     | 15.3     | 14.4    | 0.022  |
| als2a             | 557014  | amyotrophic lateral sclerosis 2a (juvenile)                 | 2.52E-01                     | 1.64E-01                     | 10.5     | 14.5     | 12.5    | 0.022  |
| slc26a2           | 557046  | solute carrier family 26 (sulfate transporter), member 2    | 5.27E-04                     | 2.93E-01                     | 1.7      | 3.2      | 2.5     | 0.022  |
| LOC557176         | 557176  | similar to phosphoinositide-3-kinase, regulatory subunit,   | 2.79E-01                     | 2.38E-02                     | 4.2      | 6.2      | 5.2     | 0.022  |
| LOC557848         | 557848  | hypothetical protein LOC557848                              | 4.18E-02                     | 2.72E-01                     | 19.0     | 16.3     | 17.7    | 0.022  |
| xpot              | 558020  | exportin, tRNA (nuclear export receptor for tRNAs)          | 1.03E-01                     | 2.81E-01                     | 22.3     | 23.3     | 22.8    | 0.022  |
| si:ch211-150o23.2 | 558029  | si:ch211-150o23.2                                           | 1.18E-01                     | 2.58E-01                     | 12.3     | 18.0     | 15.2    | 0.022  |
| lad1              | 558327  | ladinin                                                     | 1.26E-03                     | 2.98E-01                     | 8.3      | 9.2      | 8.8     | 0.022  |
| pel1b             | 558420  | pellino homolog 1b (Drosophila)                             | 5.40E-02                     | 2.65E-01                     | 13.4     | 15.0     | 14.2    | 0.022  |

**Table S1: Zebrafish circadian oscillating genes**

| Gene Symbol       | Gene ID | Gene Description                                            | Fisher's g test p value (LD) | Fisher's g test p value (DD) | LD Phase | DD Phase | Phase * | FDR ** |
|-------------------|---------|-------------------------------------------------------------|------------------------------|------------------------------|----------|----------|---------|--------|
| lipin2            | 558422  | lipin 2                                                     | 2.09E-01                     | 2.73E-01                     | 12.8     | 15.5     | 14.2    | 0.022  |
| kcna4             | 559036  | potassium voltage-gated channel, shaker-related subfam      | 1.30E-01                     | 2.97E-01                     | 1.7      | 0.5      | 1.1     | 0.022  |
| grpel1            | 559037  | GrpE-like 1, mitochondrial                                  | 5.74E-03                     | 2.64E-01                     | 1.3      | 2.2      | 1.8     | 0.022  |
| zgc:153279        | 559467  | zgc:153279                                                  | 2.66E-01                     | 2.95E-02                     | 14.0     | 16.2     | 15.1    | 0.022  |
| LOC559804         | 559804  | similar to RING finger protein 150                          | 2.59E-01                     | 3.70E-02                     | 15.5     | 19.3     | 17.4    | 0.022  |
| neu1              | 559850  | neuraminidase 1                                             | 6.08E-03                     | 2.70E-01                     | 14.5     | 18.8     | 16.7    | 0.022  |
| LOC559938         | 559938  | inositol hexakisphosphate and diphosphoinositol-pentaki     | 2.89E-01                     | 2.29E-02                     | 0.8      | 4.8      | 2.8     | 0.022  |
| arl15b            | 560030  | ADP-ribosylation factor-like 15b                            | 2.97E-01                     | 2.66E-01                     | 11.8     | 16.7     | 14.3    | 0.022  |
| serpinf2          | 560308  | serine (or cysteine) peptidase inhibitor, clade F, member   | 2.57E-01                     | 2.76E-01                     | 2.8      | 3.5      | 3.2     | 0.022  |
| tfpi2             | 560339  | tissue factor pathway inhibitor 2                           | 1.90E-01                     | 2.72E-01                     | 13.2     | 15.8     | 14.5    | 0.022  |
| lin54             | 560688  | lin-54 homolog                                              | 2.10E-02                     | 2.93E-01                     | 14.7     | 15.5     | 15.1    | 0.022  |
| si:ch211-127d4.3  | 560957  | si:ch211-127d4.3                                            | 7.61E-03                     | 2.71E-01                     | 16.0     | 17.8     | 16.9    | 0.022  |
| ptrfb             | 561082  | polymerase I and transcript release factor b                | 2.58E-01                     | 4.74E-02                     | 2.2      | 5.2      | 3.7     | 0.022  |
| si:dkey-222f8.3   | 561722  | si:dkey-222f8.3                                             | 1.59E-02                     | 2.62E-01                     | 8.0      | 11.2     | 9.6     | 0.022  |
| epha7             | 562195  | eph receptor A7                                             | 2.95E-01                     | 2.07E-01                     | 17.9     | 17.2     | 17.6    | 0.022  |
| si:ch211-241e15.2 | 562991  | si:ch211-241e15.2                                           | 6.12E-02                     | 2.54E-01                     | 1.0      | 0.5      | 0.8     | 0.022  |
| kif5ba            | 563459  | kinesin family member 5B, a                                 | 2.09E-01                     | 2.93E-01                     | 19.3     | 18.5     | 18.9    | 0.022  |
| pbxip1a           | 563463  | pre-B-cell leukemia homeobox interacting protein 1a         | 2.40E-01                     | 2.82E-01                     | 1.3      | 1.0      | 1.2     | 0.022  |
| slc17a8           | 563467  | solute carrier family 17 (sodium-dependent inorganic phc    | 2.12E-01                     | 2.86E-01                     | 15.9     | 2.7      | 21.3    | 0.022  |
| prosc             | 563548  | proline synthetase co-transcribed homolog (bacterial)       | 2.40E-01                     | 2.68E-01                     | 3.5      | 7.0      | 5.3     | 0.022  |
| si:ch211-145c1.1  | 563686  | si:ch211-145c1.1                                            | 2.74E-01                     | 2.44E-01                     | 0.5      | 1.5      | 1.0     | 0.022  |
| LOC564004         | 564004  | ubiquitin carboxyl-terminal hydrolase 45-like               | 1.37E-01                     | 2.74E-01                     | 22.5     | 23.2     | 22.9    | 0.022  |
| ngfrl             | 564338  | nerve growth factor receptor (TNFR superfamily, membe       | 2.93E-01                     | 1.20E-01                     | 5.3      | 2.8      | 4.1     | 0.022  |
| efcab4b           | 564347  | EF-hand calcium binding domain 4B                           | 1.70E-03                     | 2.68E-01                     | 15.0     | 14.3     | 14.7    | 0.022  |
| LOC564649         | 564649  | similar to 3-oxoacyl-[acyl-carrier-protein] synthase, mitoc | 2.52E-02                     | 2.59E-01                     | 12.3     | 14.5     | 13.4    | 0.022  |
| LOC565088         | 565088  | RNA pseudouridylate synthase domain-containing protei       | 9.38E-02                     | 2.92E-01                     | 22.0     | 23.7     | 22.9    | 0.022  |
| zgc:174642        | 565794  | zgc:174642                                                  | 2.81E-01                     | 2.82E-01                     | 12.0     | 9.5      | 10.8    | 0.022  |
| arid2             | 566352  | AT rich interactive domain 2 (ARID, RFX-like)               | 1.12E-01                     | 2.56E-01                     | 21.3     | 18.7     | 20.0    | 0.022  |
| sb:cb1095         | 566522  | sb:cb1095                                                   | 2.76E-01                     | 2.54E-01                     | 21.8     | 2.3      | 0.1     | 0.022  |
| git2b             | 567190  | G protein-coupled receptor kinase interactor 2b             | 2.46E-01                     | 2.88E-01                     | 14.8     | 13.2     | 14.0    | 0.022  |
| LOC567310         | 567310  | plectin-like                                                | 1.38E-01                     | 2.61E-01                     | 4.5      | 2.0      | 3.3     | 0.022  |

**Table S1: Zebrafish circadian oscillating genes**

| Gene Symbol       | Gene ID | Gene Description                                            | Fisher's g test p value (LD) | Fisher's g test p value (DD) | LD Phase | DD Phase | Phase * | FDR ** |
|-------------------|---------|-------------------------------------------------------------|------------------------------|------------------------------|----------|----------|---------|--------|
| farp2             | 567490  | FERM, RhoGEF and pleckstrin domain protein 2                | 2.12E-01                     | 2.96E-01                     | 15.9     | 15.8     | 15.9    | 0.022  |
| crsp6             | 567560  | cofactor required for Sp1 transcriptional activation, subur | 6.08E-02                     | 2.86E-01                     | 16.3     | 16.5     | 16.4    | 0.022  |
| dcaf11            | 567578  | ddb1 and cul4 associated factor 11                          | 2.95E-02                     | 2.54E-01                     | 13.3     | 14.8     | 14.0    | 0.022  |
| mycl1b            | 567762  | v-myc myelocytomatosis viral oncogene homolog 1, lung       | 6.93E-03                     | 2.57E-01                     | 5.5      | 6.2      | 5.9     | 0.022  |
| mical1            | 568573  | microtubule associated monooxygenase, calponin and LIM      | 2.38E-01                     | 2.80E-01                     | 12.0     | 15.0     | 13.5    | 0.022  |
| LOC568625         | 568625  | complement C1q-like protein 4-like                          | 1.07E-01                     | 2.93E-01                     | 18.2     | 20.2     | 19.2    | 0.022  |
| slc4a4a           | 568631  | solute carrier family 4, member 4a                          | 4.47E-05                     | 2.76E-01                     | 4.0      | 5.0      | 4.5     | 0.022  |
| pacs1             | 569034  | phosphofurin acidic cluster sorting protein 1               | 1.56E-01                     | 2.61E-01                     | 14.8     | 16.3     | 15.6    | 0.022  |
| zgc:161969        | 569044  | zgc:161969                                                  | 2.71E-01                     | 4.35E-02                     | 10.0     | 8.7      | 9.4     | 0.022  |
| zgc:153790        | 569483  | zgc:153790                                                  | 2.90E-01                     | 2.83E-01                     | 20.7     | 2.7      | 23.7    | 0.022  |
| si:ch211-233e16.1 | 569692  | si:ch211-233e16.1                                           | 6.20E-02                     | 2.70E-01                     | 1.7      | 5.8      | 3.8     | 0.022  |
| wdr76             | 570063  | WD repeat domain 76                                         | 3.25E-02                     | 2.93E-01                     | 5.7      | 6.8      | 6.3     | 0.022  |
| si:ch211-207d6.2  | 570069  | si:ch211-207d6.2                                            | 1.17E-01                     | 2.82E-01                     | 4.8      | 4.2      | 4.5     | 0.022  |
| stab1l            | 570626  | stabilin 1-like                                             | 1.92E-03                     | 2.82E-01                     | 15.5     | 18.8     | 17.2    | 0.022  |
| LOC571066         | 571066  | sialin-like                                                 | 3.94E-02                     | 2.58E-01                     | 9.7      | 20.0     | 14.9    | 0.022  |
| si:ch211-251b21.1 | 571720  | si:ch211-251b21.1                                           | 1.15E-02                     | 2.63E-01                     | 11.5     | 11.2     | 11.4    | 0.022  |
| LOC571837         | 571837  | similar to 130 kDa myosin-binding subunit of smooth mu:     | 1.92E-02                     | 2.86E-01                     | 15.8     | 16.5     | 16.2    | 0.022  |
| si:rp71-36a1.1    | 571927  | si:rp71-36a1.1                                              | 2.96E-01                     | 2.62E-01                     | 10.0     | 8.5      | 9.3     | 0.022  |
| tmem115           | 619264  | transmembrane protein 115                                   | 2.80E-01                     | 1.55E-01                     | 14.5     | 16.5     | 15.5    | 0.022  |
| baiap2a           | 678518  | BAI1-associated protein 2a                                  | 2.58E-01                     | 1.91E-01                     | 12.3     | 10.2     | 11.3    | 0.022  |
| asb16             | 678621  | ankyrin repeat and SOCS box-containing 16                   | 2.90E-02                     | 2.67E-01                     | 11.0     | 17.0     | 14.0    | 0.022  |
| cyp2k17           | 735313  | cytochrome P450, family 2, subfamily K, polypeptide17       | 6.36E-02                     | 2.70E-01                     | 12.2     | 11.2     | 11.7    | 0.022  |
| zgc:153260        | 751643  | zgc:153260                                                  | 2.78E-01                     | 1.15E-01                     | 1.3      | 3.3      | 2.3     | 0.022  |
| fam102ab          | 767674  | family with sequence similarity 102, member Ab              | 2.74E-01                     | 1.73E-01                     | 2.0      | 3.6      | 2.8     | 0.022  |
| btr16             | 767728  | bloodthirsty-related gene family, member 16                 | 1.49E-01                     | 2.89E-01                     | 13.8     | 16.9     | 15.3    | 0.022  |
| ugt5a2            | 767756  | UDP glucuronosyltransferase 5 family, polypeptide A2        | 7.03E-03                     | 2.93E-01                     | 4.3      | 2.8      | 3.6     | 0.022  |
| rab3gap1          | 777744  | RAB3 GTPase activating protein subunit 1                    | 1.62E-01                     | 2.99E-01                     | 9.0      | 10.1     | 9.6     | 0.022  |
| zgc:158626        | 791189  | zgc:158626                                                  | 2.70E-01                     | 1.50E-01                     | 11.7     | 15.0     | 13.4    | 0.022  |
| ogg1              | 791194  | 8-oxoguanine DNA glycosylase                                | 2.12E-01                     | 2.61E-01                     | 15.0     | 17.2     | 16.1    | 0.022  |
| zgc:158254        | 791209  | zgc:158254                                                  | 7.44E-02                     | 2.53E-01                     | 20.5     | 18.8     | 19.7    | 0.022  |
| pnp5a             | 791647  | purine nucleoside phosphorylase 5a                          | 2.51E-01                     | 9.22E-02                     | 7.6      | 5.4      | 6.5     | 0.022  |

**Table S1: Zebrafish circadian oscillating genes**

| Gene Symbol        | Gene ID   | Gene Description                                       | Fisher's g test p value (LD) | Fisher's g test p value (DD) | LD Phase | DD Phase | Phase * | FDR ** |
|--------------------|-----------|--------------------------------------------------------|------------------------------|------------------------------|----------|----------|---------|--------|
| rnaset2            | 791890    | ribonuclease T2                                        | 2.59E-01                     | 1.42E-01                     | 13.3     | 17.2     | 15.3    | 0.022  |
| lztr1              | 792832    | leucine-zipper-like transcription regulator 1          | 8.35E-02                     | 2.61E-01                     | 14.4     | 14.5     | 14.4    | 0.022  |
| fars2              | 793097    | phenylalanyl-tRNA synthetase 2, mitochondrial          | 2.92E-01                     | 1.77E-01                     | 3.3      | 6.7      | 5.0     | 0.022  |
| snx25              | 793657    | sorting nexin 25                                       | 3.42E-02                     | 2.83E-01                     | 16.5     | 17.8     | 17.2    | 0.022  |
| zgc:162301         | 797343    | zgc:162301                                             | 2.51E-01                     | 8.69E-02                     | 23.2     | 0.3      | 23.8    | 0.022  |
| btr29              | 797384    | bloodthirsty-related gene family, member 29            | 1.76E-02                     | 2.63E-01                     | 14.5     | 18.2     | 16.4    | 0.022  |
| nt5c1ba            | 798022    | 5'-nucleotidase, cytosolic IB a                        | 1.40E-02                     | 2.92E-01                     | 5.5      | 5.6      | 5.5     | 0.022  |
| taok3              | 798408    | TAO kinase 3                                           | 2.91E-01                     | 2.29E-01                     | 15.8     | 17.7     | 16.8    | 0.022  |
| si:ch211-217k17.10 | 798704    | si:ch211-217k17.10                                     | 2.68E-01                     | 2.07E-01                     | 22.8     | 1.5      | 0.2     | 0.022  |
| tspan13a           | 798836    | tetraspanin 13a                                        | 2.54E-01                     | 2.28E-01                     | 13.0     | 14.2     | 13.6    | 0.022  |
| ftr54              | 799511    | finTRIM family, member 54                              | 1.06E-01                     | 2.65E-01                     | 16.7     | 17.7     | 17.2    | 0.022  |
| zgc:175131         | 799648    | zgc:175131                                             | 2.60E-01                     | 2.49E-01                     | 15.9     | 17.4     | 16.7    | 0.022  |
| zgc:92606          | 100000242 | zgc:92606                                              | 2.44E-01                     | 2.89E-01                     | 12.7     | 14.2     | 13.5    | 0.022  |
| maf1               | 100000492 | v-maf musculoaponeurotic fibrosarcoma (avian) oncogene | 3.74E-02                     | 2.66E-01                     | 19.8     | 19.7     | 19.8    | 0.022  |
| glula              | 100000775 | glutamate-ammonia ligase (glutamine synthase) a        | 6.55E-02                     | 2.64E-01                     | 5.2      | 4.7      | 5.0     | 0.022  |
| LOC100002370       | 100002370 | similar to zinc finger CCCH-type containing 12B        | 6.97E-02                     | 2.78E-01                     | 21.0     | 19.0     | 20.0    | 0.022  |
| zgc:110779         | 100002945 | zgc:110779                                             | 6.24E-02                     | 2.80E-01                     | 14.2     | 16.7     | 15.5    | 0.022  |
| LOC100003592       | 100003592 | probable G-protein coupled receptor 125-like           | 2.65E-01                     | 2.90E-01                     | 15.7     | 16.0     | 15.9    | 0.022  |
| LOC100004079       | 100004079 | PR domain zinc finger protein 8-like                   | 1.81E-02                     | 2.61E-01                     | 11.5     | 15.3     | 13.4    | 0.022  |
| ddb2               | 100004133 | damage-specific DNA binding protein 2                  | 6.66E-02                     | 2.91E-01                     | 5.2      | 3.7      | 4.5     | 0.022  |
| spryd3             | 100005036 | SPRY domain containing 3                               | 1.16E-01                     | 2.66E-01                     | 16.2     | 17.8     | 17.0    | 0.022  |
| si:ch211-239j15.4  | 100006377 | si:ch211-239j15.4                                      | 2.73E-01                     | 2.97E-01                     | 15.5     | 17.1     | 16.3    | 0.022  |
| pcsk7              | 100009656 | proprotein convertase subtilisin/kexin type 7          | 2.90E-01                     | 1.62E-01                     | 16.1     | 17.3     | 16.7    | 0.022  |
| adat2              | 100034610 | adenosine deaminase, tRNA-specific 2, TAD2 homolog (   | 5.36E-02                     | 2.90E-01                     | 23.0     | 1.2      | 0.1     | 0.022  |
| zgc:162623         | 100038768 | zgc:162623                                             | 1.67E-01                     | 2.77E-01                     | 19.7     | 17.8     | 18.8    | 0.022  |
| mrpl36             | 100093703 | mitochondrial ribosomal protein L36                    | 1.08E-01                     | 2.61E-01                     | 0.7      | 2.2      | 1.5     | 0.022  |
| zgc:175274         | 100136853 | zgc:175274                                             | 2.66E-01                     | 1.16E-01                     | 0.0      | 1.3      | 0.7     | 0.022  |
| zgc:174356         | 100137120 | zgc:174356                                             | 1.46E-01                     | 2.71E-01                     | 11.0     | 12.0     | 11.5    | 0.022  |
| LOC100148748       | 100148748 | CDK5 and ABL1 enzyme substrate 2-like                  | 2.63E-01                     | 9.74E-02                     | 4.3      | 2.5      | 3.4     | 0.022  |
| LOC100149633       | 100149633 | hypothetical protein LOC100149633                      | 3.06E-02                     | 2.51E-01                     | 16.7     | 17.5     | 17.1    | 0.022  |
| cyp1b1             | 100150054 | cytochrome P450, family 1, subfamily B, polypeptide 1  | 2.92E-03                     | 2.69E-01                     | 2.2      | 2.7      | 2.5     | 0.022  |



**Table S1: Zebrafish circadian oscillating genes**

| Gene Symbol     | Gene ID   | Gene Description                                        | Fisher's g test p value (LD) | Fisher's g test p value (DD) | LD Phase | DD Phase | Phase * | FDR ** |
|-----------------|-----------|---------------------------------------------------------|------------------------------|------------------------------|----------|----------|---------|--------|
| cacna2d4        | 100150428 | calcium channel, voltage-dependent, alpha 2/delta subur | 4.69E-03                     | 2.52E-01                     | 14.7     | 16.2     | 15.4    | 0.022  |
| LOC100150889    | 100150889 | tapasin-related protein-like                            | 2.89E-01                     | 7.49E-02                     | 16.5     | 18.3     | 17.4    | 0.022  |
| si:dkey-192g7.3 | 100321723 | si:dkey-192g7.3                                         | 2.65E-01                     | 1.58E-01                     | 12.5     | 17.0     | 14.8    | 0.022  |
| LOC100329329    | 100329329 | hypothetical protein LOC100329329                       | 8.88E-02                     | 2.75E-01                     | 2.3      | 4.2      | 3.3     | 0.022  |
| LOC100330353    | 100330353 | plakophilin-3-like                                      | 3.09E-02                     | 2.53E-01                     | 12.2     | 14.7     | 13.5    | 0.022  |
| LOC100333040    | 100333040 | ADP-ribosylation factor 1-like                          | 1.63E-01                     | 2.61E-01                     | 6.2      | 6.2      | 6.2     | 0.022  |
| man2a2          | 100333987 | mannosidase, alpha, class 2A, member 2                  | 2.77E-01                     | 1.36E-02                     | 18.8     | 17.3     | 18.1    | 0.022  |
| LOC100334439    | 100334439 | CMP-N-acetylneuraminate-beta-galactosamide-alpha-2,3    | 1.13E-01                     | 2.58E-01                     | 3.4      | 4.4      | 3.9     | 0.022  |
| svil            | 30112     | supervillin                                             | 1.48E-02                     | 3.11E-01                     | 12.2     | 16.5     | 14.4    | 0.028  |
| skib            | 30113     | nuclear oncoprotein skib                                | 2.36E-02                     | 3.25E-01                     | 14.8     | 12.2     | 13.5    | 0.028  |
| alcama          | 30194     | activated leukocyte cell adhesion molecule a            | 3.41E-01                     | 7.42E-02                     | 21.8     | 18.8     | 20.3    | 0.028  |
| hoxa2b          | 30325     | homeo box A2b                                           | 3.46E-01                     | 1.12E-01                     | 17.0     | 18.0     | 17.5    | 0.028  |
| fzd5            | 30364     | frizzled homolog 5                                      | 3.43E-01                     | 8.76E-02                     | 15.7     | 17.5     | 16.6    | 0.028  |
| psmb6           | 30388     | proteasome (prosome, macropain) subunit, beta type, 6   | 3.49E-02                     | 3.41E-01                     | 17.3     | 19.5     | 18.4    | 0.028  |
| hoxa10b         | 30391     | homeo box A10b                                          | 8.41E-02                     | 3.26E-01                     | 15.3     | 17.2     | 16.3    | 0.028  |
| opn1lw1         | 30413     | opsin 1 (cone pigments), long-wave-sensitive, 1         | 3.41E-01                     | 2.01E-02                     | 14.3     | 15.0     | 14.7    | 0.028  |
| pcdh8           | 30456     | protocadherin 8                                         | 1.33E-02                     | 3.50E-01                     | 15.3     | 13.2     | 14.3    | 0.028  |
| max             | 30467     | myc-associated factor X                                 | 3.27E-01                     | 2.48E-01                     | 11.8     | 22.0     | 16.9    | 0.028  |
| hsp90a.1        | 30591     | heat shock protein 90-alpha 1                           | 3.13E-01                     | 1.85E-01                     | 2.1      | 2.8      | 2.4     | 0.028  |
| psme1           | 30648     | proteasome activator subunit 1                          | 2.61E-01                     | 3.15E-01                     | 19.8     | 21.3     | 20.6    | 0.028  |
| pdx1            | 30721     | pancreatic and duodenal homeobox 1                      | 3.49E-01                     | 2.54E-01                     | 14.7     | 15.5     | 15.1    | 0.028  |
| igf2bp3         | 30967     | insulin-like growth factor 2 mRNA binding protein 3     | 1.49E-01                     | 3.23E-01                     | 23.5     | 1.2      | 0.3     | 0.028  |
| dedd1           | 58125     | death effector domain-containing 1                      | 1.94E-01                     | 3.22E-01                     | 3.7      | 4.3      | 4.0     | 0.028  |
| dmd             | 83773     | dystrophin                                              | 3.02E-01                     | 1.70E-01                     | 16.7     | 17.9     | 17.3    | 0.028  |
| irx7            | 140746    | iroquois homeobox protein 7                             | 1.50E-01                     | 3.32E-01                     | 19.2     | 18.8     | 19.0    | 0.028  |
| fshr            | 195820    | follicle stimulating hormone receptor                   | 1.56E-01                     | 3.26E-01                     | 15.3     | 11.5     | 13.4    | 0.028  |
| ppan            | 317739    | peter pan homolog (Drosophila)                          | 3.10E-01                     | 2.97E-01                     | 21.8     | 0.8      | 23.3    | 0.028  |
| wu:fb33b12      | 321731    | wu:fb33b12                                              | 2.01E-01                     | 3.00E-01                     | 20.3     | 18.7     | 19.5    | 0.028  |
| prmt1           | 321974    | protein arginine methyltransferase 1                    | 1.39E-01                     | 3.02E-01                     | 0.2      | 2.6      | 1.4     | 0.028  |
| wu:fb49f03      | 322091    | wu:fb49f03                                              | 1.25E-01                     | 3.15E-01                     | 15.0     | 15.3     | 15.2    | 0.028  |
| csnk1da         | 322106    | casein kinase 1, delta a                                | 5.31E-03                     | 3.33E-01                     | 2.8      | 5.0      | 3.9     | 0.028  |

**Table S1: Zebrafish circadian oscillating genes**

| Gene Symbol | Gene ID | Gene Description                                                   | Fisher's g test p value (LD) | Fisher's g test p value (DD) | LD Phase | DD Phase | Phase * | FDR ** |
|-------------|---------|--------------------------------------------------------------------|------------------------------|------------------------------|----------|----------|---------|--------|
| vdac2       | 322126  | voltage-dependent anion channel 2                                  | 3.29E-01                     | 1.75E-01                     | 16.8     | 18.2     | 17.5    | 0.028  |
| agt         | 322485  | angiotensinogen                                                    | 3.07E-01                     | 1.31E-01                     | 16.3     | 18.3     | 17.3    | 0.028  |
| dus1l       | 322715  | dihydrouridine synthase 1-like (S. cerevisiae)                     | 5.56E-02                     | 3.19E-01                     | 23.5     | 2.3      | 0.9     | 0.028  |
| gas8        | 323260  | growth arrest-specific 8                                           | 1.00E-01                     | 3.25E-01                     | 13.2     | 14.3     | 13.8    | 0.028  |
| gtf2a1      | 323974  | general transcription factor IIA, 1                                | 1.42E-03                     | 3.42E-01                     | 3.3      | 4.5      | 3.9     | 0.028  |
| orc6        | 324256  | origin recognition complex, subunit 6                              | 2.00E-01                     | 3.43E-01                     | 3.3      | 4.7      | 4.0     | 0.028  |
| gcnt4a      | 324510  | glucosaminyl (N-acetyl) transferase 4, core 2, a                   | 3.36E-01                     | 3.96E-02                     | 2.5      | 2.7      | 2.6     | 0.028  |
| actr8       | 326866  | ARP8 actin-related protein 8 homolog (yeast)                       | 2.57E-01                     | 3.39E-01                     | 15.8     | 17.7     | 16.8    | 0.028  |
| rnf2        | 327035  | ring finger protein 2                                              | 3.48E-01                     | 1.92E-01                     | 14.5     | 15.7     | 15.1    | 0.028  |
| polr1a      | 327078  | polymerase (RNA) I polypeptide A                                   | 3.40E-01                     | 3.32E-01                     | 22.2     | 23.7     | 23.0    | 0.028  |
| slc26a11    | 327138  | solute carrier family 26, member 11                                | 2.54E-01                     | 3.32E-01                     | 11.5     | 11.0     | 11.3    | 0.028  |
| shcbp1      | 333933  | SHC SH2-domain binding protein 1                                   | 3.39E-01                     | 2.55E-01                     | 10.9     | 11.4     | 11.1    | 0.028  |
| ivns1abpb   | 334334  | influenza virus NS1A binding protein b                             | 8.01E-02                     | 3.19E-01                     | 7.8      | 8.3      | 8.1     | 0.028  |
| calcoco1    | 334971  | calcium binding and coiled-coil domain 1                           | 2.79E-01                     | 3.02E-01                     | 14.6     | 15.7     | 15.2    | 0.028  |
| g3bp1       | 335512  | GTPase activating protein (SH3 domain) binding protein             | 6.99E-02                     | 3.01E-01                     | 21.6     | 22.7     | 22.1    | 0.028  |
| rcbtb1      | 336007  | regulator of chromosome condensation (RCC1) and BTE                | 2.34E-01                     | 3.11E-01                     | 13.5     | 16.7     | 15.1    | 0.028  |
| nmnat2      | 336257  | nicotinamide nucleotide adenylyltransferase 2                      | 1.26E-01                     | 3.31E-01                     | 16.0     | 17.7     | 16.9    | 0.028  |
| atp5c1      | 336957  | ATP synthase, H <sup>+</sup> transporting, mitochondrial F1 comple | 3.01E-01                     | 1.23E-01                     | 1.2      | 3.8      | 2.5     | 0.028  |
| mxv         | 360145  | myxovirus (influenza virus) resistance C                           | 2.58E-01                     | 3.03E-01                     | 17.2     | 19.4     | 18.3    | 0.028  |
| gpm6ba      | 368225  | glycoprotein M6Ba                                                  | 3.22E-01                     | 1.85E-01                     | 15.8     | 14.5     | 15.2    | 0.028  |
| ubtf        | 368509  | upstream binding transcription factor, RNA polymerase I            | 3.06E-01                     | 2.23E-01                     | 1.5      | 21.1     | 23.3    | 0.028  |
| slc39a13    | 368686  | solute carrier family 39 (zinc transporter), member 13             | 3.03E-01                     | 1.73E-01                     | 0.3      | 1.2      | 0.8     | 0.028  |
| heatr5a     | 368728  | HEAT repeat containing 5a                                          | 3.41E-01                     | 2.85E-01                     | 14.0     | 15.5     | 14.8    | 0.028  |
| fkbp11      | 368823  | FK506 binding protein 11                                           | 3.04E-01                     | 1.42E-01                     | 5.4      | 5.8      | 5.6     | 0.028  |
| tnr         | 369191  | tenascin R (restrictin, janusin)                                   | 3.15E-01                     | 6.88E-02                     | 21.8     | 11.5     | 16.7    | 0.028  |
| aldocb      | 369193  | aldolase C, fructose-bisphosphate, b                               | 8.52E-04                     | 3.32E-01                     | 3.2      | 1.3      | 2.3     | 0.028  |
| fyna        | 373872  | FYN oncogene related to SRC, FGR, YES a                            | 3.31E-01                     | 2.46E-01                     | 14.7     | 15.5     | 15.1    | 0.028  |
| tmco1       | 378980  | transmembrane and coiled-coil domains 1                            | 9.09E-02                     | 3.42E-01                     | 23.3     | 0.5      | 23.9    | 0.028  |
| tim17a      | 386636  | translocase of inner mitochondrial membrane 17 homolo              | 2.62E-02                     | 3.02E-01                     | 23.5     | 1.2      | 0.3     | 0.028  |
| manba       | 393128  | mannosidase, beta A, lysosomal                                     | 1.85E-02                     | 3.23E-01                     | 15.5     | 19.5     | 17.5    | 0.028  |
| zgc:56292   | 393193  | zgc:56292                                                          | 3.16E-01                     | 2.58E-01                     | 20.8     | 23.8     | 22.3    | 0.028  |

**Table S1: Zebrafish circadian oscillating genes**

| Gene Symbol    | Gene ID | Gene Description                                         | Fisher's g test p value (LD) | Fisher's g test p value (DD) | LD Phase | DD Phase | Phase * | FDR ** |
|----------------|---------|----------------------------------------------------------|------------------------------|------------------------------|----------|----------|---------|--------|
| rnaseh2a       | 393195  | ribonuclease H2, subunit A                               | 3.14E-01                     | 1.59E-01                     | 4.5      | 5.8      | 5.2     | 0.028  |
| slc43a2a       | 393221  | solute carrier family 43, member 2a                      | 3.06E-01                     | 9.68E-03                     | 16.0     | 18.5     | 17.3    | 0.028  |
| zgc:56429      | 393247  | zgc:56429                                                | 3.24E-01                     | 8.52E-02                     | 4.8      | 6.2      | 5.5     | 0.028  |
| pwp1           | 393262  | PWP1 homolog (S. cerevisiae)                             | 1.75E-01                     | 3.13E-01                     | 1.3      | 2.2      | 1.8     | 0.028  |
| ccdc25         | 393359  | coiled-coil domain containing 25                         | 3.35E-01                     | 1.98E-02                     | 2.7      | 3.2      | 3.0     | 0.028  |
| prpf31         | 393476  | PRP31 pre-mRNA processing factor 31 homolog (yeast)      | 3.30E-01                     | 2.23E-01                     | 17.3     | 16.2     | 16.8    | 0.028  |
| vps28          | 393562  | vacuolar protein sorting 28 (yeast)                      | 3.03E-01                     | 2.33E-01                     | 13.5     | 20.2     | 16.9    | 0.028  |
| nat10          | 393617  | N-acetyltransferase 10                                   | 3.46E-01                     | 9.86E-02                     | 23.5     | 1.8      | 0.7     | 0.028  |
| ssx2ip         | 393808  | synovial sarcoma, X breakpoint 2 interacting protein     | 8.82E-02                     | 3.44E-01                     | 14.3     | 16.5     | 15.4    | 0.028  |
| ercc2          | 393900  | excision repair cross-complementing rodent repair defic  | 1.93E-01                     | 3.18E-01                     | 16.2     | 18.5     | 17.4    | 0.028  |
| gpr19          | 393969  | G protein-coupled receptor 19                            | 3.45E-01                     | 1.76E-01                     | 16.6     | 16.8     | 16.7    | 0.028  |
| pdk2           | 393971  | pyruvate dehydrogenase kinase, isoenzyme 2               | 3.27E-01                     | 2.00E-01                     | 8.0      | 8.5      | 8.3     | 0.028  |
| cox15          | 394181  | COX15 homolog, cytochrome c oxidase assembly protei      | 2.73E-01                     | 3.11E-01                     | 4.5      | 1.7      | 3.1     | 0.028  |
| zgc:55813      | 399488  | zgc:55813                                                | 3.32E-01                     | 2.58E-01                     | 16.8     | 19.2     | 18.0    | 0.028  |
| cyp17a1        | 399692  | cytochrome P450, family 17, subfamily A, polypeptide 1   | 2.11E-01                     | 3.41E-01                     | 11.0     | 13.5     | 12.3    | 0.028  |
| nptnb          | 403006  | neuroplastin b                                           | 4.57E-02                     | 3.09E-01                     | 23.3     | 3.2      | 1.3     | 0.028  |
| yipf4          | 405827  | Yip1 domain family, member 4                             | 1.00E-01                     | 3.22E-01                     | 16.0     | 16.5     | 16.3    | 0.028  |
| nlk1           | 405892  | nemo like kinase, type 1                                 | 3.02E-01                     | 2.09E-02                     | 14.8     | 15.7     | 15.3    | 0.028  |
| slc13a2        | 406537  | solute carrier family 13 (sodium-dependent dicarboxylate | 5.19E-02                     | 3.01E-01                     | 5.3      | 5.8      | 5.6     | 0.028  |
| mcrs1          | 406557  | microspherule protein 1                                  | 3.38E-01                     | 5.78E-02                     | 12.8     | 15.2     | 14.0    | 0.028  |
| dnajc7         | 406579  | DnaJ (Hsp40) homolog, subfamily C, member 7              | 3.29E-01                     | 5.65E-03                     | 16.2     | 16.0     | 16.1    | 0.028  |
| dnaja2         | 406814  | DnaJ (Hsp40) homolog, subfamily A, member 2              | 6.12E-02                     | 3.09E-01                     | 17.7     | 19.2     | 18.5    | 0.028  |
| si:dkey-37o8.1 | 407641  | si:dkey-37o8.1                                           | 3.16E-01                     | 2.62E-01                     | 15.0     | 16.7     | 15.9    | 0.028  |
| ift52          | 414931  | intraflagellar transport protein 52                      | 4.75E-02                     | 3.05E-01                     | 15.7     | 17.6     | 16.7    | 0.028  |
| zgc:91897      | 432373  | zgc:91897                                                | 2.70E-02                     | 3.18E-01                     | 3.9      | 5.8      | 4.8     | 0.028  |
| zgc:111821     | 432385  | zgc:111821                                               | 3.82E-03                     | 3.18E-01                     | 7.4      | 6.6      | 7.0     | 0.028  |
| ift172         | 432389  | intraflagellar transport 172                             | 2.81E-02                     | 3.01E-01                     | 14.3     | 16.3     | 15.3    | 0.028  |
| zgc:92045      | 436663  | zgc:92045                                                | 6.17E-02                     | 3.16E-01                     | 16.5     | 18.5     | 17.5    | 0.028  |
| ccdc85cb       | 436901  | coiled-coil domain containing 85C, b                     | 3.45E-03                     | 3.07E-01                     | 13.8     | 15.0     | 14.4    | 0.028  |
| timm10         | 436951  | translocase of inner mitochondrial membrane 10 homolo    | 9.01E-02                     | 3.14E-01                     | 23.2     | 1.2      | 0.2     | 0.028  |
| zgc:92610      | 436978  | zgc:92610                                                | 5.06E-03                     | 3.18E-01                     | 14.5     | 17.5     | 16.0    | 0.028  |

**Table S1: Zebrafish circadian oscillating genes**

| Gene Symbol       | Gene ID | Gene Description                                           | Fisher's g test p value (LD) | Fisher's g test p value (DD) | LD Phase | DD Phase | Phase * | FDR ** |
|-------------------|---------|------------------------------------------------------------|------------------------------|------------------------------|----------|----------|---------|--------|
| zgc:91985         | 445105  | zgc:91985                                                  | 2.07E-02                     | 3.01E-01                     | 8.2      | 10.0     | 9.1     | 0.028  |
| mrpl19            | 445150  | mitochondrial ribosomal protein L19                        | 3.19E-01                     | 3.35E-02                     | 22.5     | 1.4      | 24.0    | 0.028  |
| tm9sf1            | 445156  | transmembrane 9 superfamily member 1                       | 3.28E-01                     | 2.76E-01                     | 0.8      | 0.7      | 0.8     | 0.028  |
| slc16a9b          | 445158  | solute carrier family 16 (monocarboxylic acid transporter) | 3.17E-01                     | 2.08E-02                     | 16.1     | 19.2     | 17.7    | 0.028  |
| mfsd2ab           | 445176  | major facilitator superfamily domain containing 2ab        | 6.95E-02                     | 3.20E-01                     | 17.3     | 18.9     | 18.1    | 0.028  |
| zgc:101053        | 445184  | zgc:101053                                                 | 3.04E-01                     | 6.55E-02                     | 7.0      | 6.2      | 6.6     | 0.028  |
| med20             | 445191  | mediator complex subunit 20                                | 3.14E-01                     | 2.85E-01                     | 3.0      | 4.8      | 3.9     | 0.028  |
| mettl16           | 445217  | methyltransferase like 16                                  | 1.99E-01                     | 3.19E-01                     | 0.5      | 2.5      | 1.5     | 0.028  |
| ddx56             | 445399  | DEAD (Asp-Glu-Ala-Asp) box polypeptide 56                  | 3.07E-01                     | 4.37E-02                     | 21.8     | 0.0      | 22.9    | 0.028  |
| gle1              | 445408  | GLE1 RNA export mediator homolog (yeast)                   | 3.45E-01                     | 6.33E-02                     | 16.8     | 19.3     | 18.1    | 0.028  |
| cdh5              | 445471  | cadherin 5                                                 | 3.06E-01                     | 1.13E-01                     | 22.8     | 21.5     | 22.2    | 0.028  |
| pnp5b             | 447889  | purine nucleoside phosphorylase 5b                         | 1.89E-01                     | 3.21E-01                     | 2.2      | 23.7     | 1.0     | 0.028  |
| tmem56b           | 449652  | transmembrane protein 56b                                  | 6.84E-02                     | 3.16E-01                     | 3.0      | 3.5      | 3.2     | 0.028  |
| glrx              | 449769  | glutaredoxin (thioltransferase)                            | 3.25E-01                     | 2.46E-01                     | 2.7      | 4.8      | 3.7     | 0.028  |
| dtwd1             | 449778  | DTW domain containing 1                                    | 1.74E-01                     | 3.05E-01                     | 19.7     | 20.2     | 20.0    | 0.028  |
| dhrs3b            | 450050  | dehydrogenase/reductase (SDR family) member 3b             | 3.06E-01                     | 2.34E-02                     | 1.0      | 2.7      | 1.9     | 0.028  |
| acot8             | 450052  | acyl-CoA thioesterase 8                                    | 2.91E-01                     | 3.15E-01                     | 22.8     | 23.5     | 23.2    | 0.028  |
| zgc:103652        | 492492  | zgc:103652                                                 | 3.42E-01                     | 2.38E-01                     | 0.8      | 2.3      | 1.6     | 0.028  |
| def8              | 492523  | differentially expressed in FDCP 8 homolog (mouse)         | 1.04E-03                     | 3.08E-01                     | 15.6     | 18.1     | 16.8    | 0.028  |
| si:rp71-39b20.7   | 492647  | si:rp71-39b20.7                                            | 2.00E-01                     | 3.03E-01                     | 6.3      | 7.0      | 6.7     | 0.028  |
| dhrs13            | 492783  | dehydrogenase/reductase (SDR family) member 13             | 1.08E-01                     | 3.08E-01                     | 9.8      | 9.8      | 9.8     | 0.028  |
| zgc:101716        | 492784  | zgc:101716                                                 | 3.44E-01                     | 4.86E-02                     | 19.7     | 21.2     | 20.5    | 0.028  |
| atg5              | 494180  | ATG5 autophagy related 5 homolog (S. cerevisiae)           | 3.27E-01                     | 3.30E-01                     | 14.8     | 17.5     | 16.2    | 0.028  |
| il15l             | 494451  | interleukin 15, like                                       | 2.61E-01                     | 3.22E-01                     | 1.5      | 1.8      | 1.7     | 0.028  |
| si:ch211-150a22.1 | 541317  | si:ch211-150a22.1                                          | 3.07E-01                     | 3.35E-01                     | 15.8     | 18.2     | 17.0    | 0.028  |
| lamp2             | 541406  | lysosomal membrane glycoprotein 2                          | 1.91E-02                     | 3.27E-01                     | 15.9     | 18.4     | 17.1    | 0.028  |
| zgc:110537        | 541544  | zgc:110537                                                 | 3.28E-01                     | 2.13E-01                     | 0.2      | 21.3     | 22.8    | 0.028  |
| zgc:110307        | 550253  | zgc:110307                                                 | 2.45E-01                     | 3.08E-01                     | 13.3     | 18.0     | 15.7    | 0.028  |
| fcf1              | 550264  | FCF1 small subunit (SSU) processome component hom          | 1.57E-01                     | 3.39E-01                     | 0.7      | 1.8      | 1.2     | 0.028  |
| npepl1            | 550383  | aminopeptidase-like 1                                      | 3.99E-05                     | 3.13E-01                     | 5.8      | 4.3      | 5.1     | 0.028  |
| zgc:112095        | 550448  | zgc:112095                                                 | 3.17E-01                     | 1.06E-01                     | 13.8     | 12.8     | 13.3    | 0.028  |

**Table S1: Zebrafish circadian oscillating genes**

| Gene Symbol       | Gene ID | Gene Description                                       | Fisher's g test p value (LD) | Fisher's g test p value (DD) | LD Phase | DD Phase | Phase * | FDR ** |
|-------------------|---------|--------------------------------------------------------|------------------------------|------------------------------|----------|----------|---------|--------|
| shisa4            | 550567  | shisa homolog 4 (Xenopus laevis)                       | 1.97E-01                     | 3.35E-01                     | 17.8     | 16.0     | 16.9    | 0.028  |
| zgc:110609        | 550594  | zgc:110609                                             | 4.82E-02                     | 3.43E-01                     | 16.3     | 18.2     | 17.2    | 0.028  |
| clcn7             | 553351  | chloride channel 7                                     | 1.11E-01                     | 3.39E-01                     | 15.0     | 17.3     | 16.2    | 0.028  |
| tatdn3            | 553592  | TatD DNase domain containing 3                         | 1.62E-01                     | 3.20E-01                     | 4.8      | 3.0      | 3.9     | 0.028  |
| eri1              | 553641  | exoribonuclease 1                                      | 5.00E-02                     | 3.44E-01                     | 23.5     | 0.8      | 0.2     | 0.028  |
| cyb5r4            | 553685  | cytochrome b5 reductase 4                              | 3.47E-01                     | 8.21E-03                     | 15.0     | 17.5     | 16.3    | 0.028  |
| zgc:112231        | 553692  | zgc:112231                                             | 3.12E-01                     | 2.59E-02                     | 19.8     | 21.5     | 20.7    | 0.028  |
| creb3l3           | 553700  | cAMP responsive element binding protein 3-like 3       | 3.04E-01                     | 6.16E-02                     | 5.8      | 8.2      | 7.0     | 0.028  |
| zgc:112365        | 553720  | zgc:112365                                             | 1.75E-01                     | 3.18E-01                     | 22.7     | 1.2      | 24.0    | 0.028  |
| mtmr1a            | 553750  | myotubularin related protein 1a                        | 3.49E-01                     | 4.52E-02                     | 12.6     | 17.6     | 15.1    | 0.028  |
| fahd1             | 553762  | fumarylacetoacetate hydrolase domain containing 1      | 1.55E-01                     | 3.45E-01                     | 1.3      | 2.7      | 2.0     | 0.028  |
| zgc:112089        | 553799  | zgc:112089                                             | 7.27E-02                     | 3.14E-01                     | 1.2      | 3.7      | 2.5     | 0.028  |
| hbp1              | 554137  | HMG-box transcription factor 1                         | 3.10E-01                     | 5.87E-02                     | 11.5     | 13.5     | 12.5    | 0.028  |
| si:rp71-1i20.2    | 554678  | si:rp71-1i20.2                                         | 1.43E-01                     | 3.35E-01                     | 23.5     | 2.0      | 0.8     | 0.028  |
| wu:fa07b03        | 555414  | wu:fa07b03                                             | 7.22E-02                     | 3.38E-01                     | 14.7     | 15.2     | 15.0    | 0.028  |
| si:dkey-266j9.3   | 555595  | si:dkey-266j9.3                                        | 2.24E-01                     | 3.15E-01                     | 19.3     | 22.0     | 20.7    | 0.028  |
| zgc:153293        | 555710  | zgc:153293                                             | 1.95E-03                     | 3.20E-01                     | 12.5     | 15.7     | 14.1    | 0.028  |
| LOC555911         | 555911  | atrial natriuretic peptide receptor 1-like             | 6.65E-02                     | 3.26E-01                     | 16.2     | 16.0     | 16.1    | 0.028  |
| si:ch211-214j24.7 | 556080  | si:ch211-214j24.7                                      | 3.02E-01                     | 4.24E-02                     | 14.3     | 14.2     | 14.3    | 0.028  |
| gxylt1b           | 556315  | glucoside xylosyltransferase 1b                        | 3.41E-01                     | 3.07E-01                     | 14.2     | 15.8     | 15.0    | 0.028  |
| si:ch211-238n5.4  | 556432  | si:ch211-238n5.4                                       | 3.27E-01                     | 8.52E-02                     | 16.0     | 17.8     | 16.9    | 0.028  |
| zgc:172324        | 556797  | zgc:172324                                             | 3.48E-01                     | 2.30E-01                     | 13.8     | 16.2     | 15.0    | 0.028  |
| abcg5             | 557317  | ATP-binding cassette, sub-family G (WHITE), member 5   | 4.83E-02                     | 3.03E-01                     | 20.0     | 22.2     | 21.1    | 0.028  |
| tmem181           | 557799  | transmembrane protein 181                              | 1.39E-01                     | 3.17E-01                     | 1.4      | 1.5      | 1.5     | 0.028  |
| abca12            | 558335  | ATP-binding cassette, sub-family A (ABC1), member 12   | 1.25E-02                     | 3.46E-01                     | 1.8      | 1.5      | 1.7     | 0.028  |
| LOC559192         | 559192  | novel protein similar to human and mouse peptidyl-tRNA | 1.68E-02                     | 3.16E-01                     | 21.7     | 22.8     | 22.3    | 0.028  |
| LOC559258         | 559258  | uncharacterized protein C3orf23-like                   | 1.14E-03                     | 3.17E-01                     | 11.3     | 13.8     | 12.6    | 0.028  |
| LOC560089         | 560089  | multidrug and toxin extrusion protein 1-like           | 3.50E-01                     | 1.16E-01                     | 10.5     | 11.0     | 10.8    | 0.028  |
| esrp1             | 560190  | epithelial splicing regulatory protein 1               | 8.07E-02                     | 3.35E-01                     | 0.5      | 6.0      | 3.3     | 0.028  |
| eef1db            | 560745  | elongation factor-1, delta, b                          | 2.29E-01                     | 3.05E-01                     | 18.5     | 17.2     | 17.9    | 0.028  |
| antxr2b           | 560841  | anthrax toxin receptor 2b                              | 1.24E-01                     | 3.47E-01                     | 14.5     | 16.5     | 15.5    | 0.028  |

**Table S1: Zebrafish circadian oscillating genes**

| Gene Symbol      | Gene ID | Gene Description                                         | Fisher's g test p value (LD) | Fisher's g test p value (DD) | LD Phase | DD Phase | Phase * | FDR ** |
|------------------|---------|----------------------------------------------------------|------------------------------|------------------------------|----------|----------|---------|--------|
| zgc:158649       | 561239  | zgc:158649                                               | 3.37E-01                     | 2.71E-01                     | 16.3     | 19.2     | 17.8    | 0.028  |
| LOC561497        | 561497  | transmembrane channel-like protein 5-like                | 3.38E-01                     | 4.04E-02                     | 19.0     | 19.7     | 19.4    | 0.028  |
| zgc:153718       | 561624  | zgc:153718                                               | 5.91E-02                     | 3.09E-01                     | 15.3     | 18.5     | 16.9    | 0.028  |
| si:dkey-275b16.2 | 562105  | si:dkey-275b16.2                                         | 3.09E-01                     | 2.34E-01                     | 14.0     | 12.8     | 13.4    | 0.028  |
| zgc:158784       | 562138  | zgc:158784                                               | 7.23E-02                     | 3.12E-01                     | 23.5     | 4.3      | 1.9     | 0.028  |
| uhrf1bp1l        | 562208  | UHRF1 (ICBP90) binding protein 1-like                    | 3.45E-01                     | 8.80E-02                     | 15.8     | 16.0     | 15.9    | 0.028  |
| LOC562364        | 562364  | adenosine receptor A3-like                               | 6.01E-02                     | 3.25E-01                     | 13.2     | 18.5     | 15.9    | 0.028  |
| LOC562403        | 562403  | hypothetical LOC562403                                   | 3.28E-01                     | 5.99E-02                     | 21.7     | 10.5     | 16.1    | 0.028  |
| cldn2            | 562525  | claudin 2                                                | 1.65E-01                     | 3.03E-01                     | 3.5      | 21.1     | 0.3     | 0.028  |
| zgc:194780       | 562626  | zgc:194780                                               | 3.37E-01                     | 2.21E-01                     | 14.8     | 16.0     | 15.4    | 0.028  |
| LOC563450        | 563450  | similar to Potential phospholipid-transporting ATPase ID | 2.52E-02                     | 3.29E-01                     | 19.2     | 19.7     | 19.5    | 0.028  |
| fam63a           | 563470  | family with sequence similarity 63, member A             | 3.40E-01                     | 3.50E-01                     | 14.3     | 16.7     | 15.5    | 0.028  |
| tiparp           | 563506  | TCDD-inducible poly(ADP-ribose) polymerase               | 2.43E-01                     | 3.48E-01                     | 15.2     | 17.2     | 16.2    | 0.028  |
| nppcl            | 563937  | natriuretic peptide precursor C-like protein             | 3.46E-01                     | 3.19E-01                     | 16.2     | 15.7     | 16.0    | 0.028  |
| pik3r4           | 564088  | phosphoinositide-3-kinase, regulatory subunit 4          | 3.43E-01                     | 2.85E-02                     | 14.0     | 15.0     | 14.5    | 0.028  |
| LOC564392        | 564392  | acid sphingomyelinase-like phosphodiesterase 3b-like     | 3.12E-01                     | 1.45E-02                     | 4.3      | 4.0      | 4.2     | 0.028  |
| zgc:113028       | 565041  | zgc:113028                                               | 3.35E-01                     | 2.28E-03                     | 11.2     | 15.7     | 13.5    | 0.028  |
| comtb            | 565370  | catechol-O-methyltransferase b                           | 6.74E-02                     | 3.45E-01                     | 14.0     | 16.3     | 15.2    | 0.028  |
| slc4a2a          | 566075  | solute carrier family 4, anion exchanger, member 2a      | 3.32E-01                     | 1.63E-01                     | 15.0     | 19.5     | 17.3    | 0.028  |
| mcm6             | 566409  | MCM6 minichromosome maintenance deficient 6, mitotir     | 2.87E-01                     | 3.21E-01                     | 2.1      | 3.9      | 3.0     | 0.028  |
| gnsa             | 566506  | glucosamine (N-acetyl)-6-sulfatase a                     | 2.33E-01                     | 3.15E-01                     | 14.5     | 16.8     | 15.7    | 0.028  |
| si:dkey-190g11.7 | 567309  | si:dkey-190g11.7                                         | 1.46E-01                     | 3.25E-01                     | 0.7      | 2.0      | 1.4     | 0.028  |
| si:dkey-106c17.2 | 567437  | si:dkey-106c17.2                                         | 3.23E-01                     | 2.32E-01                     | 13.8     | 13.3     | 13.6    | 0.028  |
| agl              | 567798  | amylo-1, 6-glucosidase, 4-alpha-glucanotransferase       | 2.18E-01                     | 3.48E-01                     | 18.5     | 17.7     | 18.1    | 0.028  |
| wu:fj02d07       | 567862  | wu:fj02d07                                               | 3.15E-01                     | 3.30E-01                     | 17.7     | 18.5     | 18.1    | 0.028  |
| tecpr2           | 569212  | tectonin beta-propeller repeat containing 2              | 3.04E-01                     | 2.36E-01                     | 16.5     | 17.3     | 16.9    | 0.028  |
| LOC569234        | 569234  | hypothetical LOC569234                                   | 1.34E-02                     | 3.08E-01                     | 16.5     | 17.8     | 17.2    | 0.028  |
| si:ch211-202b2.2 | 569550  | si:ch211-202b2.2                                         | 1.17E-01                     | 3.15E-01                     | 11.2     | 14.2     | 12.7    | 0.028  |
| LOC569770        | 569770  | cytochrome c oxidase subunit 8B, mitochondrial-like      | 3.34E-01                     | 1.91E-01                     | 5.0      | 7.3      | 6.2     | 0.028  |
| chd2             | 569795  | chromodomain helicase DNA binding protein 2              | 3.31E-01                     | 2.98E-01                     | 15.3     | 16.8     | 16.1    | 0.028  |
| igsf21a          | 569872  | immunoglobulin superfamily, member 21a                   | 7.61E-02                     | 3.15E-01                     | 22.2     | 21.2     | 21.7    | 0.028  |

**Table S1: Zebrafish circadian oscillating genes**

| Gene Symbol       | Gene ID   | Gene Description                                             | Fisher's g test p value (LD) | Fisher's g test p value (DD) | LD Phase | DD Phase | Phase * | FDR ** |
|-------------------|-----------|--------------------------------------------------------------|------------------------------|------------------------------|----------|----------|---------|--------|
| si:dkey-18f7.1    | 570779    | si:dkey-18f7.1                                               | 3.01E-01                     | 1.54E-01                     | 20.5     | 0.8      | 22.7    | 0.028  |
| trap1             | 571959    | TNF receptor-associated protein 1                            | 2.25E-01                     | 3.33E-01                     | 0.3      | 0.5      | 0.4     | 0.028  |
| im:7159197        | 606628    | im:7159197                                                   | 3.40E-01                     | 1.12E-01                     | 19.8     | 17.7     | 18.8    | 0.028  |
| nedd4a            | 619412    | neural precursor cell expressed, developmentally down-r      | 3.00E-01                     | 5.80E-02                     | 18.2     | 17.5     | 17.9    | 0.028  |
| ihha              | 619520    | Indian hedgehog homolog a                                    | 2.09E-01                     | 3.29E-01                     | 19.4     | 19.0     | 19.2    | 0.028  |
| gsg1l             | 664746    | gsg1-like                                                    | 2.13E-01                     | 3.44E-01                     | 3.0      | 3.8      | 3.4     | 0.028  |
| id4               | 664761    | inhibitor of DNA binding 4                                   | 7.40E-02                     | 3.14E-01                     | 14.8     | 16.0     | 15.4    | 0.028  |
| f9b               | 678552    | coagulation factor IXb                                       | 3.33E-01                     | 1.58E-03                     | 6.0      | 4.0      | 5.0     | 0.028  |
| fam69a            | 678606    | family with sequence similarity 69, member A                 | 2.18E-03                     | 3.10E-01                     | 13.7     | 16.7     | 15.2    | 0.028  |
| pmp22b            | 678607    | peripheral myelin protein 22b                                | 3.38E-01                     | 2.66E-02                     | 1.0      | 2.8      | 1.9     | 0.028  |
| crb3b             | 724019    | crumbs homolog 3b                                            | 3.23E-01                     | 4.03E-02                     | 21.2     | 22.8     | 22.0    | 0.028  |
| cyb5r2            | 751641    | cytochrome b5 reductase 2                                    | 3.12E-01                     | 8.49E-02                     | 2.1      | 3.6      | 2.8     | 0.028  |
| zgc:153753        | 767716    | zgc:153753                                                   | 5.21E-03                     | 3.33E-01                     | 15.7     | 17.2     | 16.5    | 0.028  |
| zgc:153894        | 767769    | zgc:153894                                                   | 3.42E-01                     | 2.42E-01                     | 10.3     | 9.0      | 9.7     | 0.028  |
| sult2st3          | 777792    | sulfotransferase family 2, cytosolic sulfotransferase 3      | 1.33E-01                     | 3.03E-01                     | 12.3     | 12.8     | 12.6    | 0.028  |
| zgc:158263        | 791197    | zgc:158263                                                   | 1.87E-02                     | 3.19E-01                     | 3.5      | 4.8      | 4.2     | 0.028  |
| LOC794494         | 794494    | protein phosphatase 1 regulatory subunit 16A-like            | 3.07E-01                     | 1.70E-02                     | 1.0      | 2.5      | 1.8     | 0.028  |
| metap2l           | 794589    | methionyl aminopeptidase 2 like                              | 3.01E-01                     | 1.29E-01                     | 18.2     | 20.7     | 19.5    | 0.028  |
| zgc:172238        | 796270    | zgc:172238                                                   | 4.20E-02                     | 3.23E-01                     | 14.7     | 16.8     | 15.8    | 0.028  |
| arhgap20          | 796434    | Rho GTPase activating protein 20                             | 1.25E-01                     | 3.45E-01                     | 16.5     | 17.3     | 16.9    | 0.028  |
| hmx1              | 797503    | H6 homeo box 1                                               | 1.60E-01                     | 3.30E-01                     | 14.8     | 15.8     | 15.3    | 0.028  |
| LOC797939         | 797939    | Fbxl16 protein-like                                          | 2.01E-01                     | 3.28E-01                     | 1.5      | 0.3      | 0.9     | 0.028  |
| slc2a9l2          | 798023    | solute carrier family 2 (facilitated glucose transporter), m | 1.22E-01                     | 3.02E-01                     | 7.8      | 9.2      | 8.5     | 0.028  |
| si:ch211-169p10.1 | 799619    | si:ch211-169p10.1                                            | 5.90E-02                     | 3.42E-01                     | 13.8     | 15.3     | 14.6    | 0.028  |
| LOC799886         | 799886    | hypothetical LOC799886                                       | 1.78E-02                     | 3.40E-01                     | 16.3     | 14.2     | 15.3    | 0.028  |
| march6            | 100002072 | membrane-associated ring finger (C3HC4) 6                    | 3.25E-01                     | 3.87E-02                     | 16.0     | 17.0     | 16.5    | 0.028  |
| ar                | 100005148 | androgen receptor                                            | 3.56E-02                     | 3.09E-01                     | 5.0      | 5.3      | 5.2     | 0.028  |
| cox11             | 100005158 | COX11 cytochrome c oxidase assembly homolog (yeast)          | 2.39E-03                     | 3.37E-01                     | 4.0      | 1.5      | 2.8     | 0.028  |
| LOC100005645      | 100005645 | hypothetical protein LOC100005645                            | 1.59E-01                     | 3.41E-01                     | 0.8      | 3.5      | 2.2     | 0.028  |
| LOC100007768      | 100007768 | similar to mitochondrial ribosomal protein L52               | 1.64E-01                     | 3.30E-01                     | 0.5      | 1.2      | 0.9     | 0.028  |
| si:ch211-51f10.1  | 100034470 | si:ch211-51f10.1                                             | 2.60E-02                     | 3.41E-01                     | 16.7     | 18.2     | 17.5    | 0.028  |

**Table S1: Zebrafish circadian oscillating genes**

| Gene Symbol      | Gene ID   | Gene Description                                            | Fisher's g test p value (LD) | Fisher's g test p value (DD) | LD Phase | DD Phase | Phase * | FDR ** |
|------------------|-----------|-------------------------------------------------------------|------------------------------|------------------------------|----------|----------|---------|--------|
| zgc:165647       | 100101649 | zgc:165647                                                  | 5.77E-03                     | 3.00E-01                     | 7.0      | 9.7      | 8.4     | 0.028  |
| fam177a1         | 100126028 | family with sequence similarity 177, member A1              | 4.38E-02                     | 3.38E-01                     | 13.7     | 15.8     | 14.8    | 0.028  |
| cyth4b           | 100141338 | cytohesin 4b                                                | 8.32E-02                     | 3.08E-01                     | 13.8     | 17.2     | 15.5    | 0.028  |
| LOC100148286     | 100148286 | radial spokehead-like 1-like                                | 3.12E-01                     | 3.38E-01                     | 16.3     | 20.0     | 18.2    | 0.028  |
| LOC100148604     | 100148604 | fizzy-related protein homolog                               | 1.86E-01                     | 3.35E-01                     | 15.3     | 16.3     | 15.8    | 0.028  |
| cmb1             | 100151256 | carboxymethylenebutenolidase-like (Pseudomonas)             | 2.09E-01                     | 3.45E-01                     | 9.2      | 14.8     | 12.0    | 0.028  |
| abcd3b           | 100170781 | ATP-binding cassette, sub-family D (ALD), member 3b         | 3.44E-01                     | 2.64E-01                     | 17.5     | 23.2     | 20.4    | 0.028  |
| zgc:194398       | 100189615 | zgc:194398                                                  | 7.79E-02                     | 3.08E-01                     | 5.7      | 6.2      | 6.0     | 0.028  |
| mmp17b           | 100322027 | matrix metalloproteinase 17b                                | 2.21E-02                     | 3.21E-01                     | 22.0     | 23.7     | 22.9    | 0.028  |
| LOC100331289     | 100331289 | sucrase-isomaltase, intestinal-like                         | 5.96E-02                     | 3.06E-01                     | 1.3      | 3.5      | 2.4     | 0.028  |
| LOC100332086     | 100332086 | hypothetical protein LOC100332086                           | 1.09E-01                     | 3.14E-01                     | 14.5     | 14.7     | 14.6    | 0.028  |
| LOC100332166     | 100332166 | polymeric immunoglobulin receptor-like                      | 3.25E-01                     | 5.31E-02                     | 16.2     | 17.3     | 16.8    | 0.028  |
| jak2b            | 30298     | Janus kinase 2b                                             | 3.54E-01                     | 2.80E-01                     | 12.5     | 16.8     | 14.7    | 0.034  |
| hoxc11a          | 30403     | homeo box C11a                                              | 3.74E-01                     | 2.36E-01                     | 20.0     | 15.3     | 17.7    | 0.034  |
| exorh            | 30459     | extra-ocular rhodopsin                                      | 6.98E-03                     | 3.50E-01                     | 17.3     | 18.0     | 17.7    | 0.034  |
| ck2a2a           | 30488     | casein kinase 2 alpha 2a                                    | 4.12E-02                     | 3.86E-01                     | 16.3     | 19.5     | 17.9    | 0.034  |
| mef2a            | 30564     | myocyte enhancer factor 2a                                  | 5.76E-02                     | 3.64E-01                     | 0.8      | 2.2      | 1.5     | 0.034  |
| nkx2.3           | 30698     | NK2 transcription factor related 3                          | 9.30E-02                     | 3.91E-01                     | 15.0     | 16.8     | 15.9    | 0.034  |
| spon1a           | 58027     | spondin 1a                                                  | 3.68E-01                     | 8.92E-02                     | 18.5     | 10.2     | 14.4    | 0.034  |
| trpc4apa         | 58090     | transient receptor potential cation channel, subfamily C, 1 | 3.06E-01                     | 3.68E-01                     | 12.9     | 14.4     | 13.6    | 0.034  |
| pbx1a            | 58138     | pre-B-cell leukemia transcription factor 1a                 | 5.63E-02                     | 3.96E-01                     | 14.5     | 8.7      | 11.6    | 0.034  |
| six2a            | 83415     | sine oculis-related homeobox 2a                             | 3.99E-02                     | 3.72E-01                     | 16.8     | 17.8     | 17.3    | 0.034  |
| igf1             | 114433    | insulin-like growth factor 1                                | 2.05E-01                     | 3.77E-01                     | 16.2     | 23.7     | 20.0    | 0.034  |
| adh5             | 116517    | alcohol dehydrogenase 5                                     | 1.52E-01                     | 3.72E-01                     | 16.8     | 17.5     | 17.2    | 0.034  |
| uxs1             | 192315    | UDP-glucuronic acid decarboxylase 1                         | 2.77E-01                     | 3.92E-01                     | 16.5     | 19.2     | 17.9    | 0.034  |
| pcdh10a          | 259186    | protocadherin 10a                                           | 2.13E-01                     | 3.91E-01                     | 15.2     | 16.7     | 16.0    | 0.034  |
| unc45b           | 266640    | unc-45 homolog B (C. elegans)                               | 3.18E-01                     | 3.51E-01                     | 2.2      | 3.3      | 2.8     | 0.034  |
| lmo1             | 280646    | LIM domain only 1                                           | 3.87E-01                     | 3.62E-01                     | 16.3     | 15.2     | 15.8    | 0.034  |
| si:ch211-245h7.2 | 322801    | si:ch211-245h7.2                                            | 3.62E-01                     | 1.74E-01                     | 23.5     | 2.2      | 0.9     | 0.034  |
| slc35b4          | 323737    | solute carrier family 35, member B4                         | 3.03E-01                     | 3.80E-01                     | 23.8     | 2.8      | 1.3     | 0.034  |
| st5              | 323827    | suppression of tumorigenicity 5                             | 2.42E-01                     | 3.71E-01                     | 17.3     | 16.5     | 16.9    | 0.034  |



**Table S1: Zebrafish circadian oscillating genes**

| Gene Symbol | Gene ID | Gene Description                                             | Fisher's g test p value (LD) | Fisher's g test p value (DD) | LD Phase | DD Phase | Phase * | FDR ** |
|-------------|---------|--------------------------------------------------------------|------------------------------|------------------------------|----------|----------|---------|--------|
| stub1       | 324243  | STIP1 homology and U-Box containing protein 1                | 2.12E-01                     | 3.63E-01                     | 15.7     | 17.8     | 16.8    | 0.034  |
| eif2s2      | 324365  | eukaryotic translation initiation factor 2, subunit 2 beta   | 6.99E-03                     | 3.65E-01                     | 23.7     | 23.7     | 23.7    | 0.034  |
| thoc5       | 325064  | THO complex 5                                                | 1.50E-01                     | 3.77E-01                     | 17.5     | 18.4     | 17.9    | 0.034  |
| ttpa        | 325906  | tocopherol (alpha) transfer protein (ataxia (Friedreich-like | 3.87E-02                     | 3.63E-01                     | 7.3      | 10.3     | 8.8     | 0.034  |
| ccn1        | 326088  | cyclin L1                                                    | 3.92E-03                     | 3.52E-01                     | 19.0     | 20.0     | 19.5    | 0.034  |
| rnf146      | 334065  | ring finger protein 146                                      | 2.49E-02                     | 3.92E-01                     | 15.3     | 15.3     | 15.3    | 0.034  |
| mark3       | 334300  | MAP/microtubule affinity-regulating kinase 3                 | 5.23E-03                     | 3.55E-01                     | 16.7     | 17.8     | 17.3    | 0.034  |
| mbd1        | 334386  | methyl-CpG binding domain protein 1                          | 1.02E-01                     | 3.57E-01                     | 16.2     | 16.7     | 16.5    | 0.034  |
| eif3m       | 334626  | eukaryotic translation initiation factor 3, subunit M        | 3.53E-01                     | 1.68E-01                     | 17.0     | 17.7     | 17.4    | 0.034  |
| wdr48       | 334682  | WD repeat domain 48                                          | 1.45E-01                     | 3.78E-01                     | 14.2     | 13.5     | 13.9    | 0.034  |
| wu:fa10g06  | 334957  | wu:fa10g06                                                   | 2.06E-01                     | 3.52E-01                     | 21.7     | 21.6     | 21.6    | 0.034  |
| zgc:73136   | 334982  | zgc:73136                                                    | 3.75E-01                     | 1.89E-01                     | 0.6      | 1.2      | 0.9     | 0.034  |
| hspa4a      | 335865  | heat shock protein 4a                                        | 3.76E-02                     | 3.83E-01                     | 1.3      | 2.3      | 1.8     | 0.034  |
| brd8        | 337414  | bromodomain containing 8                                     | 3.32E-01                     | 3.71E-01                     | 15.2     | 14.0     | 14.6    | 0.034  |
| wu:fj81c05  | 337526  | wu:fj81c05                                                   | 1.19E-02                     | 3.79E-01                     | 7.2      | 3.5      | 5.4     | 0.034  |
| bsg         | 337692  | basigin                                                      | 3.76E-01                     | 2.14E-01                     | 3.6      | 20.9     | 0.3     | 0.034  |
| cntn1a      | 353150  | contactin 1a                                                 | 3.15E-01                     | 3.99E-01                     | 20.5     | 18.0     | 19.3    | 0.034  |
| opn1mw2     | 360151  | opsin 1 (cone pigments), medium-wave-sensitive, 2            | 3.75E-01                     | 2.68E-01                     | 8.7      | 9.3      | 9.0     | 0.034  |
| dhfr1       | 368670  | dehydrogenase/reductase (SDR family) member 1                | 1.62E-01                     | 3.77E-01                     | 5.5      | 4.3      | 4.9     | 0.034  |
| p2rx5       | 373879  | purinergic receptor P2X, ligand-gated ion channel, 5         | 3.95E-01                     | 2.71E-01                     | 17.0     | 18.2     | 17.6    | 0.034  |
| rdh1        | 378440  | retinol dehydrogenase 1                                      | 3.62E-01                     | 4.29E-02                     | 7.1      | 8.3      | 7.7     | 0.034  |
| taf12       | 386637  | TAF12 RNA polymerase II, TATA box binding protein (T         | 1.42E-01                     | 3.78E-01                     | 15.0     | 16.0     | 15.5    | 0.034  |
| rbm19       | 387255  | RNA binding motif protein 19                                 | 3.88E-01                     | 1.78E-01                     | 12.1     | 3.0      | 7.5     | 0.034  |
| sybl1       | 393236  | synaptobrevin-like 1                                         | 3.97E-01                     | 5.00E-02                     | 16.0     | 18.2     | 17.1    | 0.034  |
| chd1l       | 393283  | chromodomain helicase DNA binding protein 1-like             | 3.58E-01                     | 3.44E-02                     | 7.3      | 8.5      | 7.9     | 0.034  |
| pygmb       | 393444  | phosphorylase, glycogen (muscle) b                           | 1.40E-02                     | 3.86E-01                     | 3.2      | 4.3      | 3.8     | 0.034  |
| tmem30c     | 393568  | transmembrane protein 30C                                    | 3.95E-01                     | 1.93E-01                     | 16.2     | 11.0     | 13.6    | 0.034  |
| fhit        | 393713  | fragile histidine triad gene                                 | 3.56E-01                     | 3.39E-02                     | 23.2     | 2.2      | 0.7     | 0.034  |
| zgc:77816   | 393843  | zgc:77816                                                    | 9.75E-02                     | 3.63E-01                     | 13.9     | 16.4     | 15.2    | 0.034  |
| psmd13      | 393922  | proteasome (prosome, macropain) 26S subunit, non-ATF         | 1.52E-02                     | 3.55E-01                     | 17.8     | 19.7     | 18.8    | 0.034  |
| upf3b       | 393929  | UPF3 regulator of nonsense transcripts homolog B (yeas       | 1.13E-01                     | 3.98E-01                     | 13.5     | 16.5     | 15.0    | 0.034  |

**Table S1: Zebrafish circadian oscillating genes**

| Gene Symbol      | Gene ID | Gene Description                                        | Fisher's g test p value (LD) | Fisher's g test p value (DD) | LD Phase | DD Phase | Phase * | FDR ** |
|------------------|---------|---------------------------------------------------------|------------------------------|------------------------------|----------|----------|---------|--------|
| efhc1            | 393942  | EF-hand domain (C-terminal) containing 1                | 2.76E-01                     | 3.97E-01                     | 14.7     | 18.0     | 16.4    | 0.034  |
| mcts1            | 394046  | malignant T cell amplified sequence 1                   | 2.14E-01                     | 3.92E-01                     | 0.8      | 2.0      | 1.4     | 0.034  |
| sars2            | 394154  | seryl-tRNA synthetase 2                                 | 4.93E-02                     | 3.63E-01                     | 2.0      | 3.8      | 2.9     | 0.034  |
| zgc:73226        | 402792  | zgc:73226                                               | 3.85E-01                     | 3.04E-01                     | 4.0      | 2.2      | 3.1     | 0.034  |
| zgc:174506       | 402825  | zgc:174506                                              | 2.97E-01                     | 3.75E-01                     | 4.5      | 5.8      | 5.2     | 0.034  |
| si:ch211-35n24.1 | 402857  | si:ch211-35n24.1                                        | 2.99E-01                     | 3.73E-01                     | 14.2     | 16.2     | 15.2    | 0.034  |
| mgp              | 402937  | matrix Gla protein                                      | 2.28E-01                     | 3.75E-01                     | 2.7      | 2.2      | 2.4     | 0.034  |
| papalb           | 404041  | poly(A) polymerase beta (testis specific)               | 1.82E-01                     | 3.78E-01                     | 17.2     | 18.8     | 18.0    | 0.034  |
| pacsin2          | 404601  | protein kinase C and casein kinase substrate in neurons | 3.87E-01                     | 3.47E-01                     | 19.8     | 21.2     | 20.5    | 0.034  |
| cyrr1            | 405818  | cysteine and tyrosine-rich protein 1                    | 1.29E-01                     | 3.90E-01                     | 0.3      | 1.8      | 1.1     | 0.034  |
| gmfb             | 406384  | glia maturation factor, beta                            | 3.59E-01                     | 1.31E-01                     | 3.8      | 4.5      | 4.2     | 0.034  |
| ak3              | 406404  | adenylate kinase 3                                      | 3.73E-01                     | 2.63E-01                     | 11.8     | 13.0     | 12.4    | 0.034  |
| vta1             | 406414  | Vps20-associated 1 homolog (S. cerevisiae)              | 2.51E-02                     | 3.84E-01                     | 14.2     | 16.2     | 15.2    | 0.034  |
| dhdhl            | 406433  | dihydrodiol dehydrogenase (dimeric), like               | 8.65E-03                     | 3.96E-01                     | 11.3     | 10.5     | 10.9    | 0.034  |
| amfr             | 406442  | autocrine motility factor receptor                      | 2.06E-01                     | 3.60E-01                     | 13.5     | 14.3     | 13.9    | 0.034  |
| EIF5A2           | 406546  | eukaryotic translation initiation factor 5A2            | 3.06E-01                     | 3.80E-01                     | 0.5      | 21.5     | 23.0    | 0.034  |
| rpf2             | 406587  | ribosome production factor 2 homolog (S. cerevisiae)    | 3.61E-01                     | 1.43E-01                     | 0.8      | 1.0      | 0.9     | 0.034  |
| nsun5            | 406690  | NOP2/Sun domain family, member 5                        | 3.71E-01                     | 3.39E-01                     | 20.5     | 23.2     | 21.9    | 0.034  |
| nedd1            | 406827  | neural precursor cell expressed, developmentally down-r | 2.62E-02                     | 3.50E-01                     | 13.3     | 13.7     | 13.5    | 0.034  |
| sccpdhb          | 407665  | saccharopine dehydrogenase b                            | 1.16E-02                     | 3.95E-01                     | 15.7     | 17.7     | 16.7    | 0.034  |
| fabp7b           | 407736  | fatty acid binding protein 7, brain, b                  | 3.59E-01                     | 2.91E-02                     | 4.8      | 3.5      | 4.2     | 0.034  |
| rfng             | 414848  | radical fringe homolog (Drosophila)                     | 1.60E-02                     | 3.58E-01                     | 13.3     | 15.5     | 14.4    | 0.034  |
| nr4a1            | 431720  | nuclear receptor subfamily 4, group A, member 1         | 2.65E-01                     | 3.65E-01                     | 1.7      | 2.3      | 2.0     | 0.034  |
| slc30a5          | 436594  | solute carrier family 30 (zinc transporter), member 5   | 4.45E-02                     | 3.54E-01                     | 16.0     | 19.2     | 17.6    | 0.034  |
| cd36             | 436636  | CD36 antigen                                            | 1.18E-02                     | 3.74E-01                     | 1.5      | 2.8      | 2.2     | 0.034  |
| zgc:92647        | 436707  | zgc:92647                                               | 7.32E-02                     | 3.97E-01                     | 16.0     | 18.8     | 17.4    | 0.034  |
| zgc:92851        | 436766  | zgc:92851                                               | 3.94E-03                     | 3.66E-01                     | 3.8      | 3.0      | 3.4     | 0.034  |
| atxn7l2b         | 436928  | ataxin 7-like 2b                                        | 3.78E-01                     | 2.71E-03                     | 14.4     | 18.0     | 16.2    | 0.034  |
| zgc:100799       | 437005  | zgc:100799                                              | 3.06E-02                     | 3.67E-01                     | 22.7     | 22.5     | 22.6    | 0.034  |
| fkbp14           | 445077  | FK506 binding protein 14                                | 3.93E-01                     | 2.95E-01                     | 2.3      | 3.5      | 2.9     | 0.034  |
| paip1            | 445110  | poly(A) binding protein interacting protein 1           | 1.73E-01                     | 3.60E-01                     | 16.0     | 18.0     | 17.0    | 0.034  |

**Table S1: Zebrafish circadian oscillating genes**

| Gene Symbol    | Gene ID | Gene Description                                                 | Fisher's g test p value (LD) | Fisher's g test p value (DD) | LD Phase | DD Phase | Phase * | FDR ** |
|----------------|---------|------------------------------------------------------------------|------------------------------|------------------------------|----------|----------|---------|--------|
| rfc5           | 445385  | replication factor C (activator 1) 5                             | 3.78E-01                     | 3.15E-01                     | 5.0      | 6.3      | 5.7     | 0.034  |
| nop10          | 445391  | NOP10 ribonucleoprotein homolog (yeast)                          | 2.50E-01                     | 3.85E-01                     | 1.8      | 3.7      | 2.8     | 0.034  |
| myo6a          | 445473  | myosin VIa                                                       | 3.81E-01                     | 3.86E-02                     | 16.7     | 13.2     | 15.0    | 0.034  |
| zgc:92375      | 445475  | zgc:92375                                                        | 1.84E-01                     | 3.83E-01                     | 4.0      | 5.0      | 4.5     | 0.034  |
| fuca2          | 445487  | fucosidase, alpha-L- 2, plasma                                   | 1.34E-01                     | 3.75E-01                     | 13.6     | 14.2     | 13.9    | 0.034  |
| rnf103         | 447861  | ring finger protein 103                                          | 3.20E-01                     | 3.84E-01                     | 13.8     | 15.8     | 14.8    | 0.034  |
| dsccl1         | 447872  | defective in sister chromatid cohesion 1 homolog (S. cerevisiae) | 1.67E-02                     | 3.65E-01                     | 4.0      | 5.5      | 4.8     | 0.034  |
| zgc:103761     | 447915  | zgc:103761                                                       | 3.30E-01                     | 3.94E-01                     | 1.5      | 3.0      | 2.3     | 0.034  |
| zgc:103670     | 447926  | zgc:103670                                                       | 3.11E-02                     | 3.67E-01                     | 15.3     | 15.0     | 15.1    | 0.034  |
| park7          | 449674  | parkinson disease (autosomal recessive, early onset) 7           | 1.34E-02                     | 3.64E-01                     | 5.2      | 4.6      | 4.9     | 0.034  |
| ap3s1          | 449791  | adaptor-related protein complex 3, sigma 1 subunit               | 2.90E-01                     | 3.55E-01                     | 23.8     | 0.5      | 0.2     | 0.034  |
| rbx1           | 449846  | ring-box 1                                                       | 3.60E-01                     | 1.28E-01                     | 23.0     | 0.5      | 23.8    | 0.034  |
| tlcd1          | 450051  | TLC domain containing 1                                          | 3.77E-01                     | 3.27E-01                     | 1.0      | 3.5      | 2.3     | 0.034  |
| zgc:103668     | 492489  | zgc:103668                                                       | 3.86E-01                     | 3.35E-01                     | 7.5      | 7.7      | 7.6     | 0.034  |
| si:dkey-42i9.4 | 492503  | si:dkey-42i9.4                                                   | 4.31E-02                     | 3.92E-01                     | 11.7     | 13.5     | 12.6    | 0.034  |
| casp9          | 492763  | caspase 9, apoptosis-related cysteine protease                   | 3.71E-01                     | 3.11E-01                     | 13.5     | 16.0     | 14.8    | 0.034  |
| gpr137ba       | 492792  | G protein-coupled receptor 137ba                                 | 3.69E-01                     | 2.06E-01                     | 12.8     | 14.0     | 13.4    | 0.034  |
| zgc:101609     | 492814  | zgc:101609                                                       | 3.62E-01                     | 2.90E-01                     | 0.5      | 2.7      | 1.6     | 0.034  |
| zgc:103710     | 494039  | zgc:103710                                                       | 5.43E-02                     | 3.89E-01                     | 16.7     | 18.2     | 17.5    | 0.034  |
| slc7a2         | 494041  | solute carrier family 7 (cationic amino acid transporter, y-     | 3.53E-01                     | 1.04E-01                     | 0.7      | 2.2      | 1.5     | 0.034  |
| arhgef7b       | 494081  | Rho guanine nucleotide exchange factor (GEF) 7b                  | 8.53E-04                     | 3.50E-01                     | 13.3     | 13.9     | 13.6    | 0.034  |
| nop58          | 494152  | NOP58 ribonucleoprotein homolog (yeast)                          | 1.11E-02                     | 3.88E-01                     | 21.2     | 23.3     | 22.3    | 0.034  |
| crygs1         | 503587  | crystallin, gamma S1                                             | 3.51E-01                     | 1.11E-01                     | 21.8     | 5.2      | 1.5     | 0.034  |
| bmp6           | 503761  | bone morphogenetic protein 6                                     | 9.69E-03                     | 3.78E-01                     | 14.7     | 16.2     | 15.5    | 0.034  |
| zgc:113409     | 541361  | zgc:113409                                                       | 2.52E-01                     | 3.61E-01                     | 14.0     | 16.8     | 15.4    | 0.034  |
| zgc:103561     | 541403  | zgc:103561                                                       | 3.95E-01                     | 3.56E-01                     | 15.7     | 13.5     | 14.6    | 0.034  |
| zgc:103511     | 541407  | zgc:103511                                                       | 3.70E-03                     | 3.89E-01                     | 23.2     | 0.0      | 23.6    | 0.034  |
| zgc:113425     | 541425  | zgc:113425                                                       | 7.07E-03                     | 3.72E-01                     | 12.8     | 14.5     | 13.7    | 0.034  |
| pik3c3         | 548346  | phosphoinositide-3-kinase, class 3                               | 1.74E-03                     | 3.83E-01                     | 15.0     | 16.3     | 15.7    | 0.034  |
| zgc:112515     | 550458  | zgc:112515                                                       | 1.84E-01                     | 3.74E-01                     | 17.2     | 18.8     | 18.0    | 0.034  |
| zgc:110185     | 550532  | zgc:110185                                                       | 3.70E-01                     | 3.12E-01                     | 14.5     | 17.8     | 16.2    | 0.034  |

**Table S1: Zebrafish circadian oscillating genes**

| Gene Symbol       | Gene ID | Gene Description                                           | Fisher's g test p value (LD) | Fisher's g test p value (DD) | LD Phase | DD Phase | Phase * | FDR ** |
|-------------------|---------|------------------------------------------------------------|------------------------------|------------------------------|----------|----------|---------|--------|
| si:ch211-79h18.3  | 553029  | si:ch211-79h18.3                                           | 3.66E-01                     | 9.29E-02                     | 5.5      | 6.3      | 5.9     | 0.034  |
| nova2             | 553201  | neuro-oncological ventral antigen 2                        | 3.89E-01                     | 3.18E-01                     | 22.7     | 17.5     | 20.1    | 0.034  |
| crot              | 553204  | carnitine O-octanoyltransferase                            | 3.57E-01                     | 2.98E-01                     | 12.1     | 12.5     | 12.3    | 0.034  |
| LOC553492         | 553492  | hypothetical protein LOC553492                             | 1.47E-01                     | 3.81E-01                     | 21.4     | 22.8     | 22.1    | 0.034  |
| zgc:110158        | 553590  | zgc:110158                                                 | 3.77E-01                     | 3.40E-02                     | 17.0     | 14.8     | 15.9    | 0.034  |
| nip7              | 553616  | nuclear import 7 homolog (S. cerevisiae)                   | 3.55E-01                     | 2.50E-01                     | 23.3     | 1.5      | 0.4     | 0.034  |
| cysltr1           | 553675  | cysteinyl leukotriene receptor 1                           | 3.06E-01                     | 3.72E-01                     | 14.8     | 16.5     | 15.7    | 0.034  |
| zgc:112102        | 553678  | zgc:112102                                                 | 3.55E-01                     | 4.15E-03                     | 17.7     | 20.3     | 19.0    | 0.034  |
| gdap1             | 553702  | ganglioside-induced differentiation-associated protein 1   | 2.38E-01                     | 3.92E-01                     | 14.8     | 16.2     | 15.5    | 0.034  |
| mrps24            | 553711  | mitochondrial ribosomal protein S24                        | 3.91E-01                     | 9.43E-02                     | 2.2      | 3.1      | 2.6     | 0.034  |
| tbc1d17           | 554092  | TBC1 domain family, member 17                              | 2.07E-01                     | 3.53E-01                     | 12.0     | 14.8     | 13.4    | 0.034  |
| pdlim3a           | 554148  | PDZ and LIM domain 3a                                      | 3.59E-01                     | 3.58E-01                     | 5.5      | 5.3      | 5.4     | 0.034  |
| im:6912374        | 555254  | im:6912374                                                 | 2.07E-01                     | 3.97E-01                     | 17.0     | 18.0     | 17.5    | 0.034  |
| fam184a           | 555640  | family with sequence similarity 184, member A              | 6.45E-02                     | 3.66E-01                     | 21.2     | 19.3     | 20.3    | 0.034  |
| wfs1b             | 556580  | Wolfram syndrome 1b (wolframin)                            | 5.05E-02                     | 3.51E-01                     | 14.2     | 16.8     | 15.5    | 0.034  |
| irgq2             | 556650  | immunity-related GTPase family, q2                         | 3.76E-01                     | 2.94E-01                     | 1.2      | 1.7      | 1.5     | 0.034  |
| im:7140055        | 556704  | im:7140055                                                 | 6.30E-02                     | 3.78E-01                     | 1.2      | 3.2      | 2.2     | 0.034  |
| si:ch211-149a22.1 | 556993  | si:ch211-149a22.1                                          | 3.63E-01                     | 1.00E-02                     | 15.7     | 16.3     | 16.0    | 0.034  |
| LOC557008         | 557008  | novel protein similar to vertebrate aldehyde dehydrogenase | 3.57E-01                     | 1.18E-02                     | 4.8      | 2.3      | 3.6     | 0.034  |
| fam102bb          | 557909  | family with sequence similarity 102, member B, b           | 2.64E-01                     | 3.75E-01                     | 13.8     | 15.3     | 14.6    | 0.034  |
| atf6              | 558071  | activating transcription factor 6                          | 1.45E-03                     | 3.77E-01                     | 2.8      | 2.3      | 2.6     | 0.034  |
| zgc:153606        | 558558  | zgc:153606                                                 | 9.04E-03                     | 3.66E-01                     | 14.7     | 16.7     | 15.7    | 0.034  |
| si:dkey-42i9.10   | 558947  | si:dkey-42i9.10                                            | 3.36E-01                     | 3.68E-01                     | 7.8      | 13.0     | 10.4    | 0.034  |
| LOC559569         | 559569  | egl nine homolog 2-like                                    | 2.88E-02                     | 3.67E-01                     | 20.0     | 0.0      | 22.0    | 0.034  |
| kbtd8             | 559966  | kelch repeat and BTB (POZ) domain containing 8             | 3.83E-01                     | 3.70E-01                     | 18.2     | 17.0     | 17.6    | 0.034  |
| trim8             | 559967  | tripartite motif-containing 8                              | 3.72E-01                     | 1.08E-01                     | 17.0     | 16.3     | 16.7    | 0.034  |
| loxl1             | 560115  | lysyl oxidase-like 1                                       | 3.87E-01                     | 1.77E-01                     | 18.7     | 19.5     | 19.1    | 0.034  |
| zfp36l1a          | 561280  | zinc finger protein 36, C3H type-like 1a                   | 3.90E-01                     | 1.38E-01                     | 12.7     | 17.7     | 15.2    | 0.034  |
| plcg2             | 561747  | phospholipase C, gamma 2                                   | 3.60E-01                     | 2.38E-01                     | 21.5     | 17.3     | 19.4    | 0.034  |
| si:dkey-174m14.3  | 563117  | si:dkey-174m14.3                                           | 1.44E-01                     | 3.54E-01                     | 19.8     | 18.7     | 19.3    | 0.034  |
| arhgap12a         | 563267  | Rho GTPase activating protein 12a                          | 1.67E-02                     | 3.89E-01                     | 2.3      | 1.7      | 2.0     | 0.034  |

**Table S1: Zebrafish circadian oscillating genes**

| Gene Symbol        | Gene ID | Gene Description                                            | Fisher's g test p value (LD) | Fisher's g test p value (DD) | LD Phase | DD Phase | Phase * | FDR ** |
|--------------------|---------|-------------------------------------------------------------|------------------------------|------------------------------|----------|----------|---------|--------|
| LOC563806          | 563806  | lipid phosphate phosphohydrolase 2-like                     | 1.99E-01                     | 3.51E-01                     | 2.2      | 1.2      | 1.7     | 0.034  |
| cbln4              | 563847  | cerebellin 4 precursor                                      | 2.95E-01                     | 3.55E-01                     | 17.7     | 19.0     | 18.4    | 0.034  |
| sgsh               | 563849  | N-sulfoglucosamine sulfohydrolase (sulfamidase)             | 3.72E-01                     | 2.58E-01                     | 14.0     | 17.7     | 15.9    | 0.034  |
| setd4              | 564058  | SET domain containing 4                                     | 3.81E-01                     | 1.70E-01                     | 20.5     | 23.3     | 21.9    | 0.034  |
| pias2              | 564149  | protein inhibitor of activated STAT, 2                      | 3.84E-01                     | 1.24E-01                     | 14.7     | 15.8     | 15.3    | 0.034  |
| zgc:153635         | 564210  | zgc:153635                                                  | 3.90E-01                     | 3.55E-01                     | 16.2     | 18.2     | 17.2    | 0.034  |
| si:dkey-91f15.6    | 564304  | si:dkey-91f15.6                                             | 3.66E-01                     | 2.64E-02                     | 6.8      | 6.4      | 6.6     | 0.034  |
| ogdh               | 564552  | oxoglutarate (alpha-ketoglutarate) dehydrogenase (lipoa     | 3.04E-01                     | 3.56E-01                     | 0.7      | 21.3     | 23.0    | 0.034  |
| si:ch211-137i24.5  | 564882  | si:ch211-137i24.5                                           | 3.65E-01                     | 3.21E-02                     | 3.3      | 4.5      | 3.9     | 0.034  |
| adamts1            | 565145  | ADAM metallopeptidase with thrombospondin type 1 mol        | 3.94E-01                     | 3.49E-01                     | 14.0     | 19.0     | 16.5    | 0.034  |
| si:ch211-163i21.10 | 565282  | si:ch211-163i21.10                                          | 1.52E-01                     | 3.52E-01                     | 14.5     | 15.5     | 15.0    | 0.034  |
| si:dkey-221j11.2   | 565437  | si:dkey-221j11.2                                            | 7.84E-02                     | 3.57E-01                     | 4.7      | 2.3      | 3.5     | 0.034  |
| pde4b              | 565706  | phosphodiesterase 4B, cAMP-specific                         | 3.92E-01                     | 1.14E-01                     | 5.5      | 7.7      | 6.6     | 0.034  |
| si:dkeyp-84g1.1    | 565760  | si:dkeyp-84g1.1                                             | 3.58E-01                     | 5.87E-02                     | 3.2      | 3.8      | 3.5     | 0.034  |
| LOC565849          | 565849  | novel protein similar to vertebrate protein phosphatase 2   | 8.20E-02                     | 3.56E-01                     | 0.5      | 23.5     | 0.0     | 0.034  |
| mfi2               | 565942  | antigen p97 (melanoma associated) identified by monocl      | 3.79E-01                     | 2.98E-01                     | 7.3      | 8.3      | 7.8     | 0.034  |
| mthfsd             | 566203  | methenyltetrahydrofolate synthetase domain containing       | 9.16E-02                     | 3.72E-01                     | 3.8      | 4.3      | 4.1     | 0.034  |
| dclre1c            | 566285  | DNA cross-link repair 1C, PSO2 homolog (S. cerevisiae)      | 1.45E-03                     | 3.50E-01                     | 17.0     | 19.0     | 18.0    | 0.034  |
| tmem106bb          | 566699  | transmembrane protein 106Bb                                 | 4.00E-01                     | 1.83E-01                     | 15.8     | 17.3     | 16.6    | 0.034  |
| si:busm1-189a20.4  | 566732  | si:busm1-189a20.4                                           | 8.92E-03                     | 3.51E-01                     | 17.8     | 17.5     | 17.7    | 0.034  |
| afap111            | 566757  | actin filament associated protein 1-like 1                  | 3.53E-01                     | 1.79E-01                     | 14.8     | 14.7     | 14.8    | 0.034  |
| clvs2              | 566769  | clavesin 2                                                  | 4.50E-02                     | 3.62E-01                     | 20.3     | 17.5     | 18.9    | 0.034  |
| LOC567031          | 567031  | WD repeat-containing protein 47-like                        | 3.81E-01                     | 1.20E-01                     | 16.8     | 17.5     | 17.2    | 0.034  |
| scn4bb             | 567239  | sodium channel, voltage-gated, type IV, beta b              | 3.52E-01                     | 3.33E-01                     | 3.8      | 2.0      | 2.9     | 0.034  |
| akap12b            | 567365  | A kinase (PRKA) anchor protein (gravin) 12b                 | 3.67E-01                     | 1.84E-01                     | 16.8     | 16.7     | 16.8    | 0.034  |
| si:ch211-155m12.3  | 567533  | si:ch211-155m12.3                                           | 1.12E-02                     | 3.96E-01                     | 15.5     | 16.8     | 16.2    | 0.034  |
| slc6a8             | 567544  | solute carrier family 6 (neurotransmitter transporter, crea | 7.19E-02                     | 3.56E-01                     | 0.3      | 22.5     | 23.4    | 0.034  |
| si:dkey-193c22.1   | 567837  | si:dkey-193c22.1                                            | 3.94E-02                     | 3.75E-01                     | 6.0      | 2.3      | 4.2     | 0.034  |
| serac1             | 568022  | serine active site containing 1                             | 1.16E-01                     | 3.82E-01                     | 12.7     | 15.5     | 14.1    | 0.034  |
| sdca4              | 568593  | syndecan 4                                                  | 1.58E-01                     | 3.56E-01                     | 15.8     | 17.7     | 16.8    | 0.034  |
| si:dkey-110c1.7    | 568618  | si:dkey-110c1.7                                             | 2.83E-02                     | 3.86E-01                     | 19.8     | 18.5     | 19.2    | 0.034  |

**Table S1: Zebrafish circadian oscillating genes**

| Gene Symbol       | Gene ID | Gene Description                                       | Fisher's g test p value (LD) | Fisher's g test p value (DD) | LD Phase | DD Phase | Phase * | FDR ** |
|-------------------|---------|--------------------------------------------------------|------------------------------|------------------------------|----------|----------|---------|--------|
| LOC568719         | 568719  | hypothetical LOC568719                                 | 1.95E-01                     | 3.66E-01                     | 20.5     | 20.5     | 20.5    | 0.034  |
| LOC568809         | 568809  | transmembrane protein 82-like                          | 3.05E-03                     | 3.84E-01                     | 10.2     | 11.7     | 11.0    | 0.034  |
| tprg1l            | 568867  | tumor protein p63 regulated 1-like                     | 2.62E-01                     | 3.94E-01                     | 19.2     | 15.0     | 17.1    | 0.034  |
| zgc:136860        | 569049  | zgc:136860                                             | 3.86E-01                     | 2.28E-01                     | 15.8     | 19.0     | 17.4    | 0.034  |
| si:dkey-711l.1    | 569883  | si:dkey-711l.1                                         | 3.31E-01                     | 3.79E-01                     | 23.5     | 21.2     | 22.4    | 0.034  |
| wdr4              | 570351  | WD repeat domain 4                                     | 3.90E-02                     | 3.60E-01                     | 22.0     | 0.2      | 23.1    | 0.034  |
| si:ch211-146f4.3  | 570368  | si:ch211-146f4.3                                       | 3.90E-01                     | 2.08E-01                     | 22.8     | 3.2      | 1.0     | 0.034  |
| fgf4              | 570435  | fibroblast growth factor 4                             | 1.49E-01                     | 3.74E-01                     | 18.7     | 21.3     | 20.0    | 0.034  |
| LOC570917         | 570917  | actin-binding Rho-activating protein-like              | 3.84E-01                     | 1.12E-01                     | 15.5     | 20.8     | 18.2    | 0.034  |
| si:dkey-20i10.6   | 571658  | si:dkey-20i10.6                                        | 1.60E-02                     | 3.77E-01                     | 20.3     | 21.3     | 20.8    | 0.034  |
| asz1              | 572911  | ankyrin repeat, SAM and basic leucine zipper domain co | 3.77E-01                     | 2.34E-01                     | 3.0      | 1.7      | 2.4     | 0.034  |
| srp14             | 619260  | signal recognition particle 14                         | 3.77E-01                     | 2.84E-02                     | 1.8      | 2.8      | 2.3     | 0.034  |
| as3mt             | 664699  | arsenic (+3 oxidation state) methyltransferase         | 3.63E-01                     | 1.62E-01                     | 18.3     | 19.7     | 19.0    | 0.034  |
| zgc:136909        | 678609  | zgc:136909                                             | 1.69E-01                     | 3.76E-01                     | 1.2      | 3.5      | 2.4     | 0.034  |
| zgc:136902        | 678611  | zgc:136902                                             | 1.61E-02                     | 3.82E-01                     | 4.3      | 6.0      | 5.2     | 0.034  |
| stmn1a            | 678630  | stathmin 1a                                            | 3.13E-01                     | 3.83E-01                     | 6.8      | 6.8      | 6.8     | 0.034  |
| zgc:136560        | 692331  | zgc:136560                                             | 2.72E-01                     | 3.99E-01                     | 14.7     | 17.7     | 16.2    | 0.034  |
| setd8a            | 751629  | SET domain containing (lysine methyltransferase) 8a    | 3.67E-01                     | 7.58E-02                     | 1.3      | 2.8      | 2.1     | 0.034  |
| zgc:153151        | 751646  | zgc:153151                                             | 3.03E-03                     | 3.74E-01                     | 14.8     | 17.3     | 16.1    | 0.034  |
| zgc:153989        | 767796  | zgc:153989                                             | 9.65E-04                     | 3.85E-01                     | 0.7      | 0.8      | 0.8     | 0.034  |
| zgc:152997        | 768176  | zgc:152997                                             | 4.28E-02                     | 3.54E-01                     | 15.7     | 17.5     | 16.6    | 0.034  |
| cyp2x12           | 790965  | cytochrome P450 CYP2X12                                | 8.81E-02                     | 3.92E-01                     | 10.8     | 10.2     | 10.5    | 0.034  |
| LOC793364         | 793364  | FYVE, RhoGEF and PH domain-containing protein 4-like   | 3.57E-01                     | 2.12E-01                     | 14.7     | 17.3     | 16.0    | 0.034  |
| hip1              | 793823  | huntingtin interacting protein 1                       | 3.31E-01                     | 3.84E-01                     | 12.7     | 15.0     | 13.9    | 0.034  |
| bco2b             | 793849  | beta-carotene oxygenase 2b                             | 4.00E-01                     | 2.89E-03                     | 11.7     | 17.0     | 14.4    | 0.034  |
| si:dkey-17e16.10  | 793878  | si:dkey-17e16.10                                       | 2.42E-02                     | 3.66E-01                     | 0.0      | 23.2     | 23.6    | 0.034  |
| notch1b           | 794892  | notch homolog 1b                                       | 3.80E-01                     | 1.28E-01                     | 4.0      | 6.0      | 5.0     | 0.034  |
| ctn2              | 795310  | centrin, EF-hand protein, 2                            | 1.42E-01                     | 3.82E-01                     | 13.5     | 16.7     | 15.1    | 0.034  |
| mrps34            | 795846  | mitochondrial ribosomal protein S34                    | 3.00E-01                     | 3.77E-01                     | 0.3      | 1.2      | 0.8     | 0.034  |
| si:dkeyp-110e4.11 | 797016  | si:dkeyp-110e4.11                                      | 3.84E-01                     | 6.79E-02                     | 13.3     | 17.2     | 15.3    | 0.034  |
| si:ch211-197k23.4 | 797201  | si:ch211-197k23.4                                      | 3.79E-01                     | 3.63E-01                     | 10.7     | 13.5     | 12.1    | 0.034  |

**Table S1: Zebrafish circadian oscillating genes**

| Gene Symbol  | Gene ID   | Gene Description                                          | Fisher's g test p value (LD) | Fisher's g test p value (DD) | LD Phase | DD Phase | Phase * | FDR ** |
|--------------|-----------|-----------------------------------------------------------|------------------------------|------------------------------|----------|----------|---------|--------|
| tada2a       | 797303    | transcriptional adaptor 2A                                | 1.02E-02                     | 3.64E-01                     | 12.8     | 15.3     | 14.1    | 0.034  |
| LOC797682    | 797682    | protein FAM69A-like                                       | 3.50E-01                     | 3.46E-01                     | 20.2     | 22.0     | 21.1    | 0.034  |
| apln         | 798375    | apelin                                                    | 2.40E-01                     | 3.60E-01                     | 15.8     | 16.0     | 15.9    | 0.034  |
| zgc:194392   | 798626    | zgc:194392                                                | 6.71E-03                     | 3.59E-01                     | 4.7      | 2.7      | 3.7     | 0.034  |
| abca4a       | 798993    | ATP-binding cassette, sub-family A (ABC1), member 4a      | 5.34E-05                     | 3.83E-01                     | 6.0      | 6.5      | 6.3     | 0.034  |
| ptgesl       | 799964    | prostaglandin E synthase 2-like                           | 3.31E-02                     | 3.52E-01                     | 4.7      | 0.7      | 2.7     | 0.034  |
| nrip1b       | 100001853 | nuclear receptor interacting protein 1b                   | 5.27E-02                     | 3.73E-01                     | 11.3     | 13.5     | 12.4    | 0.034  |
| wu:fa99e11   | 100002536 | wu:fa99e11                                                | 3.45E-01                     | 3.65E-01                     | 15.2     | 15.5     | 15.4    | 0.034  |
| ppp1cb       | 100003223 | protein phosphatase 1, catalytic subunit, beta isoform    | 3.43E-02                     | 3.56E-01                     | 15.5     | 18.2     | 16.9    | 0.034  |
| LOC100004428 | 100004428 | vasorin like                                              | 3.50E-02                     | 3.77E-01                     | 17.3     | 19.2     | 18.3    | 0.034  |
| tmem174      | 100005615 | transmembrane protein 174                                 | 1.10E-01                     | 3.75E-01                     | 1.2      | 2.3      | 1.8     | 0.034  |
| cited3       | 100006037 | Cbp/p300-interacting transactivator, with Glu/Asp-rich ca | 3.97E-01                     | 1.86E-01                     | 10.5     | 14.7     | 12.6    | 0.034  |
| arl16        | 100037345 | ADP-ribosylation factor-like 16                           | 3.70E-01                     | 3.74E-01                     | 15.2     | 15.8     | 15.5    | 0.034  |
| zgc:162420   | 100037388 | zgc:162420                                                | 6.59E-02                     | 4.00E-01                     | 14.4     | 16.3     | 15.3    | 0.034  |
| LOC100148657 | 100148657 | neurotactin-like                                          | 3.92E-01                     | 3.51E-01                     | 10.8     | 16.5     | 13.7    | 0.034  |
| LOC100149258 | 100149258 | hypothetical protein LOC100149258                         | 2.98E-01                     | 3.92E-01                     | 13.5     | 12.2     | 12.9    | 0.034  |
| LOC100150431 | 100150431 | leucine-rich repeat neuronal protein 2-like               | 1.39E-01                     | 3.95E-01                     | 17.2     | 17.5     | 17.4    | 0.034  |
| LOC100151157 | 100151157 | similar to bin3, bicoid-interacting 3                     | 7.30E-02                     | 3.98E-01                     | 18.2     | 17.7     | 18.0    | 0.034  |
| serp2        | 100319240 | stress-associated endoplasmic reticulum protein family n  | 1.56E-01                     | 3.69E-01                     | 14.8     | 15.3     | 15.1    | 0.034  |
| LOC100329742 | 100329742 | zinc finger protein 653-like                              | 5.70E-02                     | 3.84E-01                     | 15.2     | 17.3     | 16.3    | 0.034  |
| LOC100330648 | 100330648 | myosin-Ib-like                                            | 3.62E-01                     | 2.09E-02                     | 3.5      | 5.5      | 4.5     | 0.034  |
| LOC100331800 | 100331800 | photoreceptor outer segment membrane glycoprotein 2-l     | 2.21E-02                     | 3.94E-01                     | 17.5     | 19.0     | 18.3    | 0.034  |
| LOC100332541 | 100332541 | hypothetical protein LOC100332541                         | 3.82E-01                     | 1.42E-01                     | 23.7     | 23.0     | 23.4    | 0.034  |
| LOC100334140 | 100334140 | hypothetical protein LOC100334140                         | 3.83E-01                     | 3.28E-01                     | 16.3     | 18.8     | 17.6    | 0.034  |
| ptch2        | 30181     | patched 2                                                 | 4.86E-02                     | 4.07E-01                     | 20.0     | 18.3     | 19.2    | 0.041  |
| copg2        | 30187     | coatamer protein complex, subunit gamma 2                 | 2.67E-01                     | 4.35E-01                     | 21.3     | 22.0     | 21.7    | 0.041  |
| efnb2a       | 30219     | ephrin B2a                                                | 2.08E-02                     | 4.35E-01                     | 17.0     | 16.0     | 16.5    | 0.041  |
| pax3a        | 30532     | paired box gene 3a                                        | 4.13E-01                     | 3.70E-02                     | 10.7     | 20.0     | 15.4    | 0.041  |
| raf1a        | 30716     | v-raf-1 murine leukemia viral oncogene homolog 1a         | 3.52E-01                     | 4.04E-01                     | 14.7     | 17.3     | 16.0    | 0.041  |
| chrna1       | 30725     | cholinergic receptor, nicotinic, alpha polypeptide 1      | 4.37E-01                     | 2.02E-02                     | 11.7     | 18.5     | 15.1    | 0.041  |
| ngf          | 58133     | nerve growth factor (beta polypeptide)                    | 1.18E-01                     | 4.10E-01                     | 15.0     | 18.5     | 16.8    | 0.041  |

**Table S1: Zebrafish circadian oscillating genes**

| Gene Symbol      | Gene ID | Gene Description                                       | Fisher's g test p value (LD) | Fisher's g test p value (DD) | LD Phase | DD Phase | Phase * | FDR ** |
|------------------|---------|--------------------------------------------------------|------------------------------|------------------------------|----------|----------|---------|--------|
| zp2.3            | 114439  | zona pellucida glycoprotein 2.3                        | 4.48E-01                     | 1.17E-01                     | 2.2      | 1.7      | 2.0     | 0.041  |
| atic             | 140622  | 5-aminoimidazole-4-carboxamide ribonucleotide formyltr | 4.08E-01                     | 4.72E-02                     | 3.2      | 4.8      | 4.0     | 0.041  |
| ahr1a            | 246224  | aryl hydrocarbon receptor 1a                           | 3.00E-01                     | 4.04E-01                     | 2.7      | 3.0      | 2.9     | 0.041  |
| caspb            | 259303  | caspase b                                              | 4.17E-01                     | 2.94E-01                     | 3.8      | 6.0      | 4.9     | 0.041  |
| ruvbl1           | 317679  | RuvB-like 1 (E. coli)                                  | 4.04E-01                     | 2.34E-01                     | 0.3      | 4.0      | 2.2     | 0.041  |
| zgc:73187        | 321203  | zgc:73187                                              | 4.28E-01                     | 1.70E-01                     | 15.3     | 19.7     | 17.5    | 0.041  |
| tomm22           | 321232  | translocase of outer mitochondrial membrane 22 homolo  | 1.25E-01                     | 4.47E-01                     | 22.7     | 1.5      | 0.1     | 0.041  |
| smyd1a           | 321245  | SET and MYND domain containing 1a                      | 1.32E-01                     | 4.41E-01                     | 16.4     | 18.1     | 17.2    | 0.041  |
| ift88            | 321855  | intraflagellar transport 88 homolog                    | 5.12E-02                     | 4.38E-01                     | 18.3     | 19.2     | 18.8    | 0.041  |
| eif1b            | 322237  | eukaryotic translation initiation factor 1B            | 9.20E-02                     | 4.24E-01                     | 16.3     | 17.0     | 16.7    | 0.041  |
| zgc:77126        | 322780  | zgc:77126                                              | 1.90E-01                     | 4.33E-01                     | 1.3      | 2.7      | 2.0     | 0.041  |
| mtmr14           | 323929  | myotubularin related protein 14                        | 1.36E-01                     | 4.09E-01                     | 14.3     | 15.5     | 14.9    | 0.041  |
| wu:fc18h07       | 324108  | wu:fc18h07                                             | 5.68E-02                     | 4.12E-01                     | 11.7     | 14.0     | 12.9    | 0.041  |
| tmem165          | 324501  | transmembrane protein 165                              | 1.16E-02                     | 4.03E-01                     | 15.2     | 16.8     | 16.0    | 0.041  |
| gpr56            | 324948  | G protein-coupled receptor 56                          | 2.55E-01                     | 4.29E-01                     | 15.0     | 17.0     | 16.0    | 0.041  |
| pars2            | 325494  | prolyl-tRNA synthetase (mitochondrial)                 | 1.30E-02                     | 4.19E-01                     | 20.8     | 23.3     | 22.1    | 0.041  |
| zmynd19          | 325735  | zinc finger, MYND domain containing 19                 | 1.81E-01                     | 4.37E-01                     | 23.7     | 1.0      | 0.4     | 0.041  |
| plxna4           | 325938  | plexin A4                                              | 1.75E-01                     | 4.42E-01                     | 22.2     | 17.3     | 19.8    | 0.041  |
| slc14a2          | 326634  | solute carrier family 14 (urea transporter), member 2  | 6.09E-02                     | 4.32E-01                     | 6.8      | 8.0      | 7.4     | 0.041  |
| tlk1b            | 326734  | tousled-like kinase 1b                                 | 4.15E-01                     | 4.41E-01                     | 15.5     | 16.3     | 15.9    | 0.041  |
| psmc4            | 326884  | proteasome (prosome, macropain) 26S subunit, ATPase    | 7.40E-02                     | 4.02E-01                     | 17.5     | 19.0     | 18.3    | 0.041  |
| fam3c            | 334205  | family with sequence similarity 3, member C            | 7.80E-02                     | 4.29E-01                     | 2.5      | 2.0      | 2.3     | 0.041  |
| si:dkey-18f23.10 | 334465  | si:dkey-18f23.10                                       | 2.34E-02                     | 4.05E-01                     | 19.0     | 16.3     | 17.7    | 0.041  |
| mdh1b            | 335715  | malate dehydrogenase 1b, NAD (soluble)                 | 4.14E-01                     | 2.08E-01                     | 3.0      | 3.4      | 3.2     | 0.041  |
| sema6a           | 336060  | sema domain, transmembrane domain (TM), and cytopla    | 1.75E-01                     | 4.48E-01                     | 18.3     | 17.5     | 17.9    | 0.041  |
| optn             | 336159  | optineurin                                             | 3.96E-01                     | 4.47E-01                     | 12.8     | 16.2     | 14.5    | 0.041  |
| cdr2l            | 336227  | cerebellar degeneration-related protein 2-like         | 2.44E-02                     | 4.47E-01                     | 18.3     | 17.3     | 17.8    | 0.041  |
| sdf2             | 336879  | stromal cell-derived factor 2                          | 2.22E-02                     | 4.33E-01                     | 1.8      | 1.9      | 1.8     | 0.041  |
| tbl2             | 337068  | transducin (beta)-like 2                               | 1.70E-01                     | 4.22E-01                     | 23.5     | 23.8     | 23.7    | 0.041  |
| zgc:85910        | 337459  | zgc:85910                                              | 1.34E-01                     | 4.34E-01                     | 1.2      | 0.2      | 0.7     | 0.041  |
| wu:fj87a11       | 337614  | wu:fj87a11                                             | 1.23E-02                     | 4.17E-01                     | 15.2     | 17.2     | 16.2    | 0.041  |



**Table S1: Zebrafish circadian oscillating genes**

| Gene Symbol | Gene ID | Gene Description                                         | Fisher's g test p value (LD) | Fisher's g test p value (DD) | LD Phase | DD Phase | Phase * | FDR ** |
|-------------|---------|----------------------------------------------------------|------------------------------|------------------------------|----------|----------|---------|--------|
| timp2a      | 359835  | tissue inhibitor of metalloproteinase 2a                 | 1.20E-02                     | 4.11E-01                     | 16.5     | 17.2     | 16.9    | 0.041  |
| tbx1        | 368206  | T-box 1                                                  | 3.79E-01                     | 4.48E-01                     | 14.3     | 17.2     | 15.8    | 0.041  |
| adka        | 368220  | adenosine kinase a                                       | 4.26E-01                     | 4.07E-01                     | 2.8      | 3.5      | 3.2     | 0.041  |
| yars        | 368235  | tyrosyl-tRNA synthetase                                  | 5.10E-02                     | 4.36E-01                     | 22.7     | 0.8      | 23.8    | 0.041  |
| xiap        | 373108  | X-linked inhibitor of apoptosis                          | 7.16E-02                     | 4.08E-01                     | 22.7     | 1.2      | 24.0    | 0.041  |
| cdc14b      | 393148  | CDC14 cell division cycle 14 homolog B                   | 4.05E-01                     | 5.74E-02                     | 14.0     | 13.5     | 13.8    | 0.041  |
| fzr1        | 393223  | fizzy/cell division cycle 20 related 1 (Drosophila)      | 4.19E-01                     | 1.18E-01                     | 12.8     | 14.7     | 13.8    | 0.041  |
| slc25a32a   | 393226  | solute carrier family 25, member 32a                     | 3.00E-01                     | 4.44E-01                     | 12.7     | 14.8     | 13.8    | 0.041  |
| zgc:56706   | 393244  | zgc:56706                                                | 4.18E-01                     | 4.10E-01                     | 4.2      | 4.5      | 4.4     | 0.041  |
| zgc:56676   | 393273  | zgc:56676                                                | 1.46E-01                     | 4.08E-01                     | 0.5      | 23.5     | 0.0     | 0.041  |
| chuk        | 393287  | conserved helix-loop-helix ubiquitous kinase             | 7.06E-02                     | 4.27E-01                     | 13.7     | 15.3     | 14.5    | 0.041  |
| cog6        | 393290  | component of oligomeric golgi complex 6                  | 6.60E-02                     | 4.08E-01                     | 22.7     | 19.3     | 21.0    | 0.041  |
| zgc:56585   | 393297  | zgc:56585                                                | 4.34E-01                     | 1.88E-01                     | 2.8      | 3.0      | 2.9     | 0.041  |
| ero1l       | 393321  | ERO1-like (S. cerevisiae)                                | 4.25E-01                     | 1.99E-01                     | 0.3      | 23.7     | 0.0     | 0.041  |
| ncs1a       | 393437  | neuronal calcium sensor 1a                               | 4.12E-01                     | 7.86E-02                     | 11.3     | 11.3     | 11.3    | 0.041  |
| zgc:65780   | 393506  | zgc:65780                                                | 4.15E-01                     | 3.86E-01                     | 3.7      | 4.8      | 4.3     | 0.041  |
| mtap        | 393526  | methylthioadenosine phosphorylase                        | 1.16E-01                     | 4.38E-01                     | 1.8      | 4.0      | 2.9     | 0.041  |
| tsc22d3     | 393541  | TSC22 domain family, member 3                            | 4.62E-03                     | 4.23E-01                     | 7.8      | 9.3      | 8.6     | 0.041  |
| skp1        | 393716  | S-phase kinase-associated protein 1                      | 2.48E-01                     | 4.12E-01                     | 22.8     | 19.8     | 21.3    | 0.041  |
| panx1       | 393890  | pannexin 1                                               | 1.52E-01                     | 4.44E-01                     | 18.8     | 20.5     | 19.7    | 0.041  |
| cdc5l       | 394059  | CDC5 cell division cycle 5-like (S. pombe)               | 4.41E-01                     | 2.26E-01                     | 19.7     | 18.7     | 19.2    | 0.041  |
| zgc:56376   | 394070  | zgc:56376                                                | 4.27E-01                     | 1.38E-01                     | 11.6     | 15.4     | 13.5    | 0.041  |
| kdsr        | 394114  | 3-ketodihydroshingosine reductase                        | 2.15E-01                     | 4.47E-01                     | 4.7      | 2.3      | 3.5     | 0.041  |
| ubxn7       | 402913  | UBX domain protein 7                                     | 4.43E-01                     | 4.36E-01                     | 14.3     | 16.7     | 15.5    | 0.041  |
| zswim6      | 403057  | zinc finger, SWIM-type containing 6                      | 4.12E-01                     | 1.97E-01                     | 22.5     | 19.0     | 20.8    | 0.041  |
| araf        | 403063  | v-raf murine sarcoma 3611 viral oncogene homolog         | 2.24E-01                     | 4.39E-01                     | 15.7     | 17.5     | 16.6    | 0.041  |
| dnajc2      | 403080  | DnaJ (Hsp40) homolog, subfamily C, member 2              | 4.42E-02                     | 4.43E-01                     | 22.3     | 23.8     | 23.1    | 0.041  |
| slc13a3     | 405838  | solute carrier family 13 (sodium-dependent dicarboxylate | 4.19E-01                     | 4.39E-01                     | 1.2      | 2.3      | 1.8     | 0.041  |
| prkag1      | 406440  | protein kinase, AMP-activated, gamma 1 non-catalytic su  | 4.01E-01                     | 3.90E-01                     | 16.5     | 17.5     | 17.0    | 0.041  |
| orc5        | 406479  | origin recognition complex, subunit 5                    | 4.10E-01                     | 1.54E-01                     | 3.0      | 4.8      | 3.9     | 0.041  |
| rftn2       | 406729  | raftlin family member 2                                  | 3.60E-01                     | 4.31E-01                     | 14.4     | 15.4     | 14.9    | 0.041  |

**Table S1: Zebrafish circadian oscillating genes**

| Gene Symbol | Gene ID | Gene Description                                          | Fisher's g test p value (LD) | Fisher's g test p value (DD) | LD Phase | DD Phase | Phase * | FDR ** |
|-------------|---------|-----------------------------------------------------------|------------------------------|------------------------------|----------|----------|---------|--------|
| tax1bp3     | 406779  | Tax1 (human T-cell leukemia virus type I) binding protein | 7.80E-02                     | 4.42E-01                     | 5.3      | 4.0      | 4.7     | 0.041  |
| skiv2l2     | 406795  | superkiller viralicidic activity 2-like 2                 | 4.70E-02                     | 4.06E-01                     | 23.3     | 2.2      | 0.8     | 0.041  |
| LOC407656   | 407656  | hypothetical protein LOC407656                            | 7.40E-02                     | 4.02E-01                     | 9.8      | 15.5     | 12.7    | 0.041  |
| hpert1l     | 415146  | hypoxanthine phosphoribosyltransferase 1, like            | 2.48E-02                     | 4.04E-01                     | 1.3      | 2.8      | 2.1     | 0.041  |
| tjp2b       | 436639  | tight junction protein 2b (zona occludens 2)              | 6.67E-02                     | 4.17E-01                     | 14.3     | 15.2     | 14.8    | 0.041  |
| ctsl.1      | 436641  | cathepsin L.1                                             | 4.10E-01                     | 6.13E-02                     | 12.7     | 11.8     | 12.3    | 0.041  |
| zgc:92061   | 436656  | zgc:92061                                                 | 6.58E-02                     | 4.20E-01                     | 10.8     | 13.8     | 12.3    | 0.041  |
| psmb2       | 436882  | proteasome (prosome, macropain) subunit, beta type, 2     | 4.11E-01                     | 8.32E-02                     | 20.5     | 21.7     | 21.1    | 0.041  |
| gins3       | 442931  | GIN5 complex subunit 3                                    | 3.64E-01                     | 4.49E-01                     | 5.0      | 6.0      | 5.5     | 0.041  |
| pdcd7       | 445020  | programmed cell death 7                                   | 1.43E-01                     | 4.23E-01                     | 15.5     | 11.0     | 13.3    | 0.041  |
| zgc:92380   | 445086  | zgc:92380                                                 | 1.53E-01                     | 4.18E-01                     | 16.5     | 19.0     | 17.8    | 0.041  |
| g6pca       | 445118  | glucose-6-phosphatase a, catalytic                        | 4.34E-01                     | 1.75E-02                     | 5.5      | 4.3      | 4.9     | 0.041  |
| hsbpap1     | 445320  | hsbp associated protein 1                                 | 2.11E-01                     | 4.11E-01                     | 13.2     | 16.0     | 14.6    | 0.041  |
| ddx51       | 445387  | DEAD (Asp-Glu-Ala-Asp) box polypeptide 51                 | 4.01E-01                     | 2.71E-01                     | 22.7     | 0.5      | 23.6    | 0.041  |
| s100s       | 445481  | S100 calcium binding protein S                            | 2.04E-01                     | 4.46E-01                     | 14.5     | 19.3     | 16.9    | 0.041  |
| morc2       | 445488  | MORC family CW-type zinc finger 2                         | 6.72E-02                     | 4.13E-01                     | 23.8     | 23.2     | 23.5    | 0.041  |
| zgc:92111   | 447807  | zgc:92111                                                 | 4.34E-01                     | 3.28E-01                     | 21.7     | 1.2      | 23.5    | 0.041  |
| ccdc47      | 447812  | coiled-coil domain containing 47                          | 2.08E-01                     | 4.21E-01                     | 21.3     | 23.8     | 22.6    | 0.041  |
| gbgt1l3     | 447881  | globoside alpha-1,3-N-acetylgalactosaminyltransferase 1   | 1.32E-01                     | 4.24E-01                     | 22.3     | 0.7      | 23.5    | 0.041  |
| hint1       | 449551  | histidine triad nucleotide binding protein 1              | 4.11E-01                     | 7.46E-02                     | 3.2      | 5.2      | 4.2     | 0.041  |
| pex10       | 449821  | peroxisome biogenesis factor 10                           | 4.44E-01                     | 3.41E-01                     | 3.0      | 22.8     | 0.9     | 0.041  |
| zgc:101765  | 450036  | zgc:101765                                                | 1.77E-01                     | 4.10E-01                     | 6.0      | 6.8      | 6.4     | 0.041  |
| gcga        | 494052  | glucagon a                                                | 4.16E-01                     | 1.69E-01                     | 23.7     | 22.7     | 23.2    | 0.041  |
| rab25       | 494098  | RAB25, member RAS oncogene family                         | 3.14E-02                     | 4.47E-01                     | 1.8      | 3.0      | 2.4     | 0.041  |
| prkar1aa    | 494533  | protein kinase, cAMP-dependent, regulatory, type I, alpha | 2.36E-01                     | 4.01E-01                     | 14.5     | 16.2     | 15.3    | 0.041  |
| mecom       | 497407  | MDS1 and EVI1 complex locus                               | 1.69E-01                     | 4.23E-01                     | 15.7     | 9.5      | 12.6    | 0.041  |
| numbl       | 497616  | numb homolog (Drosophila)-like                            | 4.08E-01                     | 2.95E-01                     | 11.8     | 12.3     | 12.1    | 0.041  |
| scube2      | 503728  | signal peptide, CUB domain, EGF-like 2                    | 1.43E-01                     | 4.17E-01                     | 14.8     | 16.2     | 15.5    | 0.041  |
| zgc:113114  | 503732  | zgc:113114                                                | 9.25E-02                     | 4.44E-01                     | 7.0      | 7.2      | 7.1     | 0.041  |
| zgc:113263  | 503753  | zgc:113263                                                | 2.16E-01                     | 4.07E-01                     | 14.5     | 16.0     | 15.3    | 0.041  |
| zgc:113036  | 503762  | zgc:113036                                                | 2.26E-02                     | 4.33E-01                     | 23.3     | 2.3      | 0.8     | 0.041  |

**Table S1: Zebrafish circadian oscillating genes**

| Gene Symbol      | Gene ID | Gene Description                                                  | Fisher's g test p value (LD) | Fisher's g test p value (DD) | LD Phase | DD Phase | Phase * | FDR ** |
|------------------|---------|-------------------------------------------------------------------|------------------------------|------------------------------|----------|----------|---------|--------|
| phf23a           | 541372  | PHD finger protein 23a                                            | 8.77E-02                     | 4.49E-01                     | 21.5     | 22.7     | 22.1    | 0.041  |
| eif4enif1        | 541411  | eukaryotic translation initiation factor 4E nuclear import factor | 4.20E-01                     | 2.65E-01                     | 14.7     | 12.0     | 13.4    | 0.041  |
| zgc:112015       | 550376  | zgc:112015                                                        | 1.88E-01                     | 4.35E-01                     | 2.0      | 5.8      | 3.9     | 0.041  |
| baiap2l1b        | 550528  | BAI1-associated protein 2-like 1b                                 | 4.43E-01                     | 3.97E-01                     | 14.5     | 12.8     | 13.7    | 0.041  |
| LOC553259        | 553259  | hypothetical protein LOC553259                                    | 4.24E-01                     | 8.74E-02                     | 12.2     | 23.3     | 17.7    | 0.041  |
| setdb1a          | 553292  | SET domain, bifurcated 1a                                         | 4.27E-01                     | 2.01E-01                     | 2.2      | 6.2      | 4.2     | 0.041  |
| ngly1            | 553627  | N-glycanase 1                                                     | 4.12E-01                     | 4.17E-01                     | 16.8     | 19.5     | 18.2    | 0.041  |
| zgc:112367       | 554110  | zgc:112367                                                        | 4.12E-01                     | 3.14E-01                     | 3.7      | 5.5      | 4.6     | 0.041  |
| asb1             | 554673  | ankyrin repeat and SOCS box-containing 1                          | 1.60E-01                     | 4.45E-01                     | 10.5     | 14.8     | 12.7    | 0.041  |
| gpr157           | 555274  | G protein-coupled receptor 157                                    | 1.14E-01                     | 4.08E-01                     | 14.7     | 17.7     | 16.2    | 0.041  |
| taf1             | 555452  | TAF1 RNA polymerase II, TATA box binding protein (TBI)            | 4.39E-01                     | 2.88E-01                     | 15.3     | 17.1     | 16.2    | 0.041  |
| pcdh19           | 555688  | protocadherin 19                                                  | 8.73E-02                     | 4.30E-01                     | 18.2     | 17.3     | 17.8    | 0.041  |
| wbscr16          | 555972  | Williams-Beuren syndrome chromosome region 16 homolog             | 3.97E-01                     | 4.11E-01                     | 0.0      | 1.7      | 0.9     | 0.041  |
| tmem69           | 557512  | transmembrane protein 69                                          | 4.64E-02                     | 4.28E-01                     | 1.8      | 2.2      | 2.0     | 0.041  |
| LOC557524        | 557524  | serine/threonine-protein kinase SBK1-like                         | 2.49E-01                     | 4.18E-01                     | 0.3      | 23.3     | 23.8    | 0.041  |
| zgc:153031       | 557552  | zgc:153031                                                        | 4.45E-01                     | 5.05E-02                     | 19.3     | 22.7     | 21.0    | 0.041  |
| nt5c2b           | 557972  | 5'-nucleotidase, cytosolic IIb                                    | 3.08E-02                     | 4.46E-01                     | 18.0     | 18.3     | 18.2    | 0.041  |
| si:dkey-19f21.3  | 557996  | si:dkey-19f21.3                                                   | 1.02E-01                     | 4.35E-01                     | 15.2     | 17.2     | 16.2    | 0.041  |
| si:ch211-86h15.1 | 558435  | si:ch211-86h15.1                                                  | 2.45E-01                     | 4.14E-01                     | 12.5     | 16.0     | 14.3    | 0.041  |
| selo             | 558648  | selenoprotein O                                                   | 4.31E-02                     | 4.28E-01                     | 5.5      | 5.7      | 5.6     | 0.041  |
| cacnb2b          | 558806  | calcium channel, voltage-dependent, beta 2b                       | 1.79E-01                     | 4.33E-01                     | 17.8     | 12.8     | 15.3    | 0.041  |
| zgc:165467       | 558833  | zgc:165467                                                        | 4.46E-01                     | 3.34E-02                     | 16.7     | 17.3     | 17.0    | 0.041  |
| LOC558930        | 558930  | UDP-GlcNAc:betaGal beta-1,3-N-acetylglucosaminyltransferase       | 4.21E-01                     | 3.50E-01                     | 9.0      | 10.3     | 9.7     | 0.041  |
| lingo4b          | 559074  | leucine rich repeat and Ig domain containing 4b                   | 4.49E-03                     | 4.28E-01                     | 15.2     | 15.3     | 15.3    | 0.041  |
| LOC559239        | 559239  | hypothetical LOC559239                                            | 4.14E-02                     | 4.20E-01                     | 12.7     | 14.8     | 13.7    | 0.041  |
| LOC559281        | 559281  | insulin receptor substrate 1-B-like                               | 3.54E-01                     | 4.00E-01                     | 6.3      | 7.0      | 6.7     | 0.041  |
| syne2b           | 559348  | spectrin repeat containing, nuclear envelope 2b                   | 5.52E-04                     | 4.38E-01                     | 15.2     | 14.5     | 14.9    | 0.041  |
| si:dkey-246j7.1  | 559429  | si:dkey-246j7.1                                                   | 1.01E-01                     | 4.34E-01                     | 5.3      | 3.3      | 4.3     | 0.041  |
| LOC559643        | 559643  | novel protein similar to vertebrate erythrocyte membrane protein  | 1.83E-01                     | 4.33E-01                     | 15.8     | 12.0     | 13.9    | 0.041  |
| si:dkeyp-11g8.6  | 559657  | si:dkeyp-11g8.6                                                   | 1.74E-01                     | 4.38E-01                     | 5.2      | 6.7      | 6.0     | 0.041  |
| illr4            | 559737  | immune-related, lectin-like receptor 4                            | 1.81E-01                     | 4.42E-01                     | 12.0     | 18.2     | 15.1    | 0.041  |

**Table S1: Zebrafish circadian oscillating genes**

| Gene Symbol       | Gene ID | Gene Description                                          | Fisher's g test p value (LD) | Fisher's g test p value (DD) | LD Phase | DD Phase | Phase * | FDR ** |
|-------------------|---------|-----------------------------------------------------------|------------------------------|------------------------------|----------|----------|---------|--------|
| armc3             | 560136  | armadillo repeat containing 3                             | 1.94E-01                     | 4.12E-01                     | 15.3     | 16.0     | 15.7    | 0.041  |
| atpaf2            | 560253  | ATP synthase mitochondrial F1 complex assembly factor     | 1.29E-02                     | 4.39E-01                     | 0.2      | 1.8      | 1.0     | 0.041  |
| LOC560304         | 560304  | sushi domain-containing protein 4-like                    | 4.19E-01                     | 9.62E-02                     | 17.9     | 17.8     | 17.8    | 0.041  |
| si:dkey-1h24.3    | 560319  | si:dkey-1h24.3                                            | 4.27E-01                     | 4.32E-01                     | 23.5     | 1.0      | 0.3     | 0.041  |
| cspg4             | 560393  | chondroitin sulfate proteoglycan 4                        | 1.07E-02                     | 4.11E-01                     | 4.2      | 4.8      | 4.5     | 0.041  |
| gfer              | 560433  | growth factor, augments liver regeneration (ERV1 homolog) | 4.41E-01                     | 4.01E-01                     | 23.8     | 1.3      | 0.6     | 0.041  |
| EIF3EB            | 561049  | eukaryotic translation initiation factor 3, subunit E, b  | 7.66E-02                     | 4.35E-01                     | 16.3     | 18.2     | 17.3    | 0.041  |
| si:dkey-149j18.2  | 561142  | si:dkey-149j18.2                                          | 1.93E-01                     | 4.30E-01                     | 23.7     | 2.2      | 1.0     | 0.041  |
| ZGC153898         | 561339  | ZGC153898                                                 | 2.34E-01                     | 4.46E-01                     | 23.7     | 20.3     | 22.0    | 0.041  |
| WU:FC76B11        | 561802  | WU:FC76B11                                                | 6.68E-02                     | 4.31E-01                     | 12.7     | 12.7     | 12.7    | 0.041  |
| SNX18A            | 562372  | sorting nexin 18a                                         | 1.01E-01                     | 4.47E-01                     | 4.0      | 3.7      | 3.9     | 0.041  |
| si:ch211-234g24.1 | 562516  | si:ch211-234g24.1                                         | 4.06E-01                     | 9.04E-02                     | 14.7     | 15.8     | 15.3    | 0.041  |
| AHI1              | 562701  | Abelson helper integration site 1                         | 1.55E-01                     | 4.33E-01                     | 10.5     | 11.7     | 11.1    | 0.041  |
| A1CF              | 562916  | apobec1 complementation factor                            | 9.61E-02                     | 4.32E-01                     | 23.0     | 23.8     | 23.4    | 0.041  |
| ZGC163107         | 563454  | ZGC163107                                                 | 3.05E-01                     | 4.35E-01                     | 17.8     | 19.5     | 18.7    | 0.041  |
| TTL6              | 564075  | tubulin tyrosine ligase-like family, member 6             | 3.35E-02                     | 4.47E-01                     | 13.5     | 14.5     | 14.0    | 0.041  |
| si:ch211-51n14.1  | 564336  | si:ch211-51n14.1                                          | 1.46E-01                     | 4.45E-01                     | 3.2      | 4.2      | 3.7     | 0.041  |
| si:ch211-145m1.1  | 564423  | si:ch211-145m1.1                                          | 2.84E-01                     | 4.26E-01                     | 1.9      | 1.3      | 1.6     | 0.041  |
| RASSF7A           | 564485  | Ras association (RalGDS/AF-6) domain family (N-terminal)  | 9.78E-02                     | 4.17E-01                     | 15.2     | 15.0     | 15.1    | 0.041  |
| TMEM198B          | 564608  | transmembrane protein 198b                                | 2.90E-03                     | 4.29E-01                     | 16.0     | 16.2     | 16.1    | 0.041  |
| si:ch211-153j24.6 | 564794  | si:ch211-153j24.6                                         | 4.25E-01                     | 3.29E-01                     | 10.0     | 14.2     | 12.1    | 0.041  |
| AKAP9             | 565037  | A kinase (PRKA) anchor protein (yotiao) 9                 | 4.08E-01                     | 1.00E-01                     | 17.7     | 17.7     | 17.7    | 0.041  |
| DGAT2             | 565316  | diacylglycerol O-acyltransferase 2                        | 1.37E-01                     | 4.14E-01                     | 8.4      | 10.2     | 9.3     | 0.041  |
| si:ch211-11c15.3  | 566329  | si:ch211-11c15.3                                          | 4.17E-01                     | 1.53E-01                     | 5.7      | 5.8      | 5.8     | 0.041  |
| UQCRLH            | 566723  | ubiquinol-cytochrome c reductase hinge protein            | 4.16E-01                     | 1.19E-01                     | 23.8     | 3.0      | 1.4     | 0.041  |
| MICAL3B           | 566850  | molecule interacting with CasL 3b                         | 1.43E-02                     | 4.48E-01                     | 14.0     | 14.9     | 14.4    | 0.041  |
| MIA3              | 567041  | melanoma inhibitory activity family, member 3             | 4.18E-01                     | 1.71E-01                     | 18.0     | 16.7     | 17.4    | 0.041  |
| ZGC162576         | 567100  | ZGC162576                                                 | 4.16E-02                     | 4.31E-01                     | 14.2     | 15.7     | 15.0    | 0.041  |
| si:ch211-241o7.4  | 567267  | si:ch211-241o7.4                                          | 2.23E-02                     | 4.06E-01                     | 17.2     | 16.8     | 17.0    | 0.041  |
| NLGN3B            | 567415  | neuroligin 3b                                             | 3.34E-01                     | 4.02E-01                     | 22.2     | 20.2     | 21.2    | 0.041  |
| ZGC123177         | 567680  | ZGC123177                                                 | 2.67E-01                     | 4.15E-01                     | 12.8     | 16.0     | 14.4    | 0.041  |

**Table S1: Zebrafish circadian oscillating genes**

| Gene Symbol | Gene ID | Gene Description                                           | Fisher's g test p value (LD) | Fisher's g test p value (DD) | LD Phase | DD Phase | Phase * | FDR ** |
|-------------|---------|------------------------------------------------------------|------------------------------|------------------------------|----------|----------|---------|--------|
| ml13b       | 568162  | myeloid/lymphoid or mixed-lineage leukemia 3b              | 4.20E-01                     | 3.36E-01                     | 22.0     | 16.3     | 19.2    | 0.041  |
| lrrn1       | 568527  | leucine rich repeat neuronal 1                             | 2.71E-01                     | 4.12E-01                     | 16.8     | 16.2     | 16.5    | 0.041  |
| LOC568811   | 568811  | similar to Protein kinase C and casein kinase substrate ir | 1.26E-01                     | 4.18E-01                     | 14.3     | 14.0     | 14.2    | 0.041  |
| reep2       | 568927  | receptor accessory protein 2                               | 1.46E-02                     | 4.21E-01                     | 2.8      | 3.2      | 3.0     | 0.041  |
| im:7147183  | 569546  | im:7147183                                                 | 3.37E-03                     | 4.12E-01                     | 12.6     | 12.5     | 12.6    | 0.041  |
| tox         | 569666  | thymocyte selection-associated high mobility group box     | 1.61E-02                     | 4.36E-01                     | 19.8     | 16.2     | 18.0    | 0.041  |
| slc24a5     | 570312  | solute carrier family 24, member 5                         | 1.16E-03                     | 4.23E-01                     | 23.1     | 11.8     | 17.4    | 0.041  |
| bbs12       | 570583  | Bardet-Biedl syndrome 12                                   | 2.97E-01                     | 4.40E-01                     | 13.3     | 15.8     | 14.6    | 0.041  |
| moxd1       | 570584  | monooxygenase, DBH-like 1                                  | 2.90E-01                     | 4.38E-01                     | 8.7      | 21.2     | 3.0     | 0.041  |
| epha8       | 570677  | eph receptor A8                                            | 3.02E-01                     | 4.25E-01                     | 21.0     | 16.7     | 18.9    | 0.041  |
| cyp2aa1     | 572000  | cytochrome P450, family 2, subfamily AA, polypeptide 1     | 3.62E-01                     | 4.14E-01                     | 15.3     | 15.0     | 15.2    | 0.041  |
| tnnt2d      | 574000  | troponin T2d, cardiac                                      | 4.89E-02                     | 4.22E-01                     | 13.8     | 17.8     | 15.8    | 0.041  |
| reep3l      | 641577  | receptor accessory protein 3, like                         | 4.38E-01                     | 8.09E-02                     | 9.5      | 9.8      | 9.7     | 0.041  |
| trim55b     | 664753  | tripartite motif-containing 55b                            | 3.55E-01                     | 4.07E-01                     | 13.8     | 16.2     | 15.0    | 0.041  |
| tbce        | 664760  | tubulin folding cofactor E                                 | 1.13E-01                     | 4.46E-01                     | 15.5     | 17.3     | 16.4    | 0.041  |
| cirbp       | 678563  | cold inducible RNA binding protein                         | 2.16E-02                     | 4.14E-01                     | 16.2     | 16.8     | 16.5    | 0.041  |
| dab1b       | 678641  | disabled homolog 1b (Drosophila)                           | 2.80E-01                     | 4.06E-01                     | 14.0     | 16.7     | 15.4    | 0.041  |
| pde12       | 692319  | phosphodiesterase 12                                       | 6.79E-02                     | 4.43E-01                     | 23.7     | 1.3      | 0.5     | 0.041  |
| zgc:153763  | 751717  | zgc:153763                                                 | 4.46E-01                     | 1.34E-02                     | 2.2      | 2.5      | 2.4     | 0.041  |
| abhd12      | 767657  | abhydrolase domain containing 12                           | 1.27E-02                     | 4.22E-01                     | 4.7      | 3.0      | 3.9     | 0.041  |
| zgc:154040  | 767688  | zgc:154040                                                 | 4.00E-01                     | 1.67E-01                     | 23.3     | 23.3     | 23.3    | 0.041  |
| zgc:153723  | 767718  | zgc:153723                                                 | 4.12E-01                     | 4.44E-01                     | 2.5      | 23.3     | 0.9     | 0.041  |
| klhl24      | 768198  | kelch-like 24 (Drosophila)                                 | 4.09E-01                     | 7.63E-02                     | 15.3     | 18.7     | 17.0    | 0.041  |
| fbxo11      | 777607  | F-box protein 11                                           | 5.19E-02                     | 4.43E-01                     | 20.8     | 16.7     | 18.8    | 0.041  |
| zfyve28     | 777615  | zinc finger, FYVE domain containing 28                     | 4.41E-01                     | 1.37E-01                     | 21.2     | 19.3     | 20.3    | 0.041  |
| zgc:153012  | 777626  | zgc:153012                                                 | 4.17E-01                     | 1.98E-01                     | 14.8     | 16.7     | 15.8    | 0.041  |
| crfb7       | 777651  | cytokine receptor family member b7                         | 9.45E-02                     | 4.17E-01                     | 13.2     | 16.8     | 15.0    | 0.041  |
| fam46ba     | 777768  | family with sequence similarity 46, member Ba              | 4.21E-01                     | 4.87E-02                     | 8.2      | 8.5      | 8.4     | 0.041  |
| ldlrp1b     | 791153  | low density lipoprotein receptor adaptor protein 1b        | 2.76E-01                     | 4.12E-01                     | 0.7      | 21.3     | 23.0    | 0.041  |
| zgc:158689  | 791177  | zgc:158689                                                 | 3.32E-01                     | 4.31E-01                     | 12.3     | 16.7     | 14.5    | 0.041  |
| sepp1b      | 791479  | selenoprotein P, plasma, 1b                                | 4.38E-01                     | 1.92E-01                     | 5.5      | 6.7      | 6.1     | 0.041  |

**Table S1: Zebrafish circadian oscillating genes**

| Gene Symbol       | Gene ID   | Gene Description                                           | Fisher's g test p value (LD) | Fisher's g test p value (DD) | LD Phase | DD Phase | Phase * | FDR ** |
|-------------------|-----------|------------------------------------------------------------|------------------------------|------------------------------|----------|----------|---------|--------|
| galk2             | 792268    | galactokinase 2                                            | 1.75E-01                     | 4.36E-01                     | 13.7     | 12.3     | 13.0    | 0.041  |
| wu:fd14a06        | 794433    | wu:fd14a06                                                 | 1.13E-01                     | 4.44E-01                     | 23.0     | 22.5     | 22.8    | 0.041  |
| zgc:163143        | 795946    | zgc:163143                                                 | 2.41E-02                     | 4.46E-01                     | 14.2     | 15.8     | 15.0    | 0.041  |
| dnajc6            | 796345    | DnaJ (Hsp40) homolog, subfamily C, member 6                | 2.72E-01                     | 4.39E-01                     | 0.5      | 20.5     | 22.5    | 0.041  |
| si:dkey-286j15.1  | 796378    | si:dkey-286j15.1                                           | 4.43E-01                     | 7.73E-02                     | 16.2     | 18.3     | 17.3    | 0.041  |
| LOC797085         | 797085    | zinc metalloproteinase nas-15-like                         | 4.09E-01                     | 1.06E-01                     | 5.3      | 7.2      | 6.3     | 0.041  |
| LOC798075         | 798075    | fascin 2A                                                  | 1.75E-01                     | 4.25E-01                     | 0.8      | 1.3      | 1.1     | 0.041  |
| LOC799022         | 799022    | galactosidase, beta 1-like                                 | 1.06E-01                     | 4.46E-01                     | 12.5     | 8.7      | 10.6    | 0.041  |
| oip5              | 799087    | opa interacting protein 5                                  | 1.27E-01                     | 4.47E-01                     | 11.8     | 11.2     | 11.5    | 0.041  |
| ppp1r3da          | 799144    | protein phosphatase 1, regulatory (inhibitor) subunit 3D ε | 3.24E-03                     | 4.13E-01                     | 11.3     | 14.7     | 13.0    | 0.041  |
| gbp4              | 100001368 | guanylate binding protein 4                                | 8.36E-02                     | 4.33E-01                     | 2.8      | 3.2      | 3.0     | 0.041  |
| LOC100002786      | 100002786 | probable G-protein coupled receptor 83-like                | 7.13E-02                     | 4.08E-01                     | 23.3     | 18.8     | 21.1    | 0.041  |
| zgc:162701        | 100003383 | zgc:162701                                                 | 4.49E-01                     | 4.48E-01                     | 21.8     | 2.5      | 0.2     | 0.041  |
| zgc:162898        | 100003490 | zgc:162898                                                 | 5.43E-02                     | 4.08E-01                     | 17.3     | 18.3     | 17.8    | 0.041  |
| zeb2a             | 100003889 | zinc finger E-box binding homeobox 2a                      | 1.39E-01                     | 4.42E-01                     | 19.0     | 16.2     | 17.6    | 0.041  |
| LOC100004307      | 100004307 | hypothetical protein LOC100004307                          | 4.47E-01                     | 2.45E-01                     | 3.7      | 4.3      | 4.0     | 0.041  |
| phyhiplb          | 100004913 | phytanoyl-CoA 2-hydroxylase interacting protein-like b     | 9.26E-05                     | 4.02E-01                     | 3.5      | 2.5      | 3.0     | 0.041  |
| LOC100004941      | 100004941 | grpE protein homolog 2, mitochondrial-like                 | 4.94E-03                     | 4.33E-01                     | 15.7     | 17.8     | 16.8    | 0.041  |
| LOC100007598      | 100007598 | relaxin-3 receptor 1-like                                  | 4.09E-01                     | 3.43E-01                     | 12.5     | 15.2     | 13.9    | 0.041  |
| si:dkey-13i19.7   | 100034649 | si:dkey-13i19.7                                            | 4.01E-01                     | 2.95E-01                     | 1.0      | 22.3     | 23.7    | 0.041  |
| zgc:162999        | 100038772 | zgc:162999                                                 | 2.30E-02                     | 4.22E-01                     | 14.8     | 13.0     | 13.9    | 0.041  |
| si:ch211-284o19.6 | 100144567 | si:ch211-284o19.6                                          | 3.14E-01                     | 4.38E-01                     | 15.2     | 17.8     | 16.5    | 0.041  |
| LOC100148274      | 100148274 | hypothetical protein LOC100148274                          | 4.27E-01                     | 3.23E-01                     | 21.7     | 18.5     | 20.1    | 0.041  |
| LOC100148281      | 100148281 | novel protein similar to H.sapiens WDR89, WD repeat dc     | 4.28E-01                     | 4.10E-01                     | 23.5     | 2.5      | 1.0     | 0.041  |
| LOC100148910      | 100148910 | hypothetical protein LOC100148910                          | 2.63E-01                     | 4.09E-01                     | 14.2     | 15.8     | 15.0    | 0.041  |
| LOC100151174      | 100151174 | heparan sulfate 2-O-sulfotransferase 1-like                | 1.18E-01                     | 4.29E-01                     | 16.2     | 14.3     | 15.3    | 0.041  |
| si:dkeyp-115d2.5  | 100320541 | si:dkeyp-115d2.5                                           | 4.42E-01                     | 5.56E-03                     | 21.5     | 15.8     | 18.7    | 0.041  |
| si:dkey-256e7.8   | 100321607 | si:dkey-256e7.8                                            | 6.40E-02                     | 4.08E-01                     | 10.7     | 12.2     | 11.5    | 0.041  |
| LOC100332407      | 100332407 | hypothetical protein LOC100332407                          | 4.36E-01                     | 1.15E-01                     | 7.2      | 12.7     | 10.0    | 0.041  |
| LOC100333859      | 100333859 | hypothetical protein LOC100333859                          | 4.07E-01                     | 1.08E-01                     | 2.3      | 2.5      | 2.4     | 0.041  |
| LOC100334535      | 100334535 | ubl carboxyl-terminal hydrolase 18-like                    | 3.43E-01                     | 4.01E-01                     | 16.5     | 18.3     | 17.4    | 0.041  |

**Table S1: Zebrafish circadian oscillating genes**

| Gene Symbol     | Gene ID | Gene Description                                                   | Fisher's g test p value (LD) | Fisher's g test p value (DD) | LD Phase | DD Phase | Phase * | FDR ** |
|-----------------|---------|--------------------------------------------------------------------|------------------------------|------------------------------|----------|----------|---------|--------|
| hoxb2a          | 30338   | homeo box B2a                                                      | 1.26E-01                     | 4.79E-01                     | 16.5     | 15.8     | 16.2    | 0.049  |
| hoxb1b          | 30374   | homeo box B1b                                                      | 4.30E-02                     | 4.87E-01                     | 16.3     | 16.7     | 16.5    | 0.049  |
| nr2f5           | 30427   | nuclear receptor subfamily 2, group F, member 5                    | 3.06E-01                     | 4.94E-01                     | 17.2     | 20.0     | 18.6    | 0.049  |
| tmod4           | 30441   | tropomodulin 4 (muscle)                                            | 4.81E-01                     | 3.70E-01                     | 4.2      | 5.0      | 4.6     | 0.049  |
| smad1           | 30628   | MAD homolog 1 (Drosophila)                                         | 1.84E-02                     | 4.83E-01                     | 19.8     | 20.8     | 20.3    | 0.049  |
| bmp2b           | 30632   | bone morphogenetic protein 2b                                      | 2.58E-01                     | 4.83E-01                     | 16.3     | 19.0     | 17.7    | 0.049  |
| psen2           | 58026   | presenilin 2                                                       | 3.58E-02                     | 4.84E-01                     | 15.8     | 16.8     | 16.3    | 0.049  |
| hoxa4a          | 58050   | homeo box A4a                                                      | 8.07E-02                     | 4.91E-01                     | 16.2     | 17.7     | 17.0    | 0.049  |
| twsg1a          | 84037   | twisted gastrulation homolog 1a (Drosophila)                       | 3.77E-02                     | 4.71E-01                     | 12.0     | 11.2     | 11.6    | 0.049  |
| ugdh            | 116991  | UDP-glucose dehydrogenase                                          | 4.64E-01                     | 1.41E-01                     | 2.2      | 3.5      | 2.9     | 0.049  |
| gnat2           | 140429  | guanine nucleotide binding protein (G protein), alpha trar         | 7.81E-02                     | 4.57E-01                     | 2.0      | 3.7      | 2.9     | 0.049  |
| ND1             | 140531  | NADH dehydrogenase subunit 1                                       | 1.09E-01                     | 4.86E-01                     | 1.3      | 3.0      | 2.2     | 0.049  |
| lrrc17          | 321202  | leucine rich repeat containing 17                                  | 2.48E-01                     | 4.99E-01                     | 3.8      | 5.5      | 4.7     | 0.049  |
| h1fx            | 322508  | H1 histone family, member X                                        | 4.74E-01                     | 4.92E-01                     | 12.7     | 15.2     | 14.0    | 0.049  |
| pfdn2           | 323012  | prefoldin subunit 2                                                | 2.53E-01                     | 4.83E-01                     | 0.3      | 2.3      | 1.3     | 0.049  |
| zgc:165515      | 323052  | zgc:165515                                                         | 1.20E-02                     | 4.52E-01                     | 4.7      | 4.7      | 4.7     | 0.049  |
| wbp2            | 325287  | WW domain binding protein 2                                        | 4.66E-01                     | 2.02E-02                     | 17.3     | 18.0     | 17.7    | 0.049  |
| gclc            | 326857  | glutamate-cysteine ligase, catalytic subunit                       | 4.72E-01                     | 4.69E-01                     | 2.2      | 2.3      | 2.3     | 0.049  |
| rasgef1ba       | 327572  | RasGEF domain family, member 1Ba                                   | 6.43E-02                     | 4.55E-01                     | 4.5      | 4.8      | 4.7     | 0.049  |
| zgc:66432       | 327616  | zgc:66432                                                          | 1.35E-01                     | 4.99E-01                     | 20.3     | 23.8     | 22.1    | 0.049  |
| gnsb            | 327635  | glucosamine (N-acetyl)-6-sulfatase (Sanfilippo disease II          | 4.68E-01                     | 8.63E-02                     | 16.2     | 17.2     | 16.7    | 0.049  |
| wu:fi28f11      | 334054  | wu:fi28f11                                                         | 4.82E-01                     | 4.62E-01                     | 13.2     | 15.7     | 14.5    | 0.049  |
| mbtps2          | 334658  | membrane-bound transcription factor protease, site 2               | 2.49E-01                     | 4.91E-01                     | 14.8     | 16.0     | 15.4    | 0.049  |
| wu:fk47b06      | 334660  | wu:fk47b06                                                         | 1.09E-01                     | 4.78E-01                     | 1.0      | 1.2      | 1.1     | 0.049  |
| acsbg2          | 335159  | acyl-CoA synthetase bubblegum family member 2                      | 4.94E-01                     | 6.01E-02                     | 15.8     | 16.8     | 16.3    | 0.049  |
| atp5o           | 335191  | ATP synthase, H <sup>+</sup> transporting, mitochondrial F1 comple | 4.32E-01                     | 4.97E-01                     | 2.3      | 5.0      | 3.7     | 0.049  |
| fbxo42          | 335459  | F-box protein 42                                                   | 3.44E-01                     | 4.81E-01                     | 15.7     | 15.5     | 15.6    | 0.049  |
| sod2            | 335799  | superoxide dismutase 2, mitochondrial                              | 6.72E-02                     | 4.79E-01                     | 4.7      | 2.5      | 3.6     | 0.049  |
| nkapl           | 336120  | NFKB activating protein-like                                       | 3.36E-01                     | 4.87E-01                     | 16.0     | 16.7     | 16.4    | 0.049  |
| slc38a6         | 336741  | solute carrier family 38, member 6                                 | 3.87E-03                     | 4.77E-01                     | 15.3     | 18.7     | 17.0    | 0.049  |
| si:dkey-256h2.1 | 337520  | si:dkey-256h2.1                                                    | 1.71E-01                     | 4.60E-01                     | 13.8     | 15.8     | 14.8    | 0.049  |

**Table S1: Zebrafish circadian oscillating genes**

| Gene Symbol | Gene ID | Gene Description                                       | Fisher's g test p value (LD) | Fisher's g test p value (DD) | LD Phase | DD Phase | Phase * | FDR ** |
|-------------|---------|--------------------------------------------------------|------------------------------|------------------------------|----------|----------|---------|--------|
| wu:fj81e10  | 337532  | wu:fj81e10                                             | 2.76E-02                     | 4.51E-01                     | 14.7     | 16.7     | 15.7    | 0.049  |
| unc119.1    | 338230  | unc-119 homolog 1                                      | 1.72E-01                     | 4.75E-01                     | 11.8     | 16.3     | 14.1    | 0.049  |
| echdc2      | 338247  | enoyl CoA hydratase domain containing 2                | 1.69E-01                     | 4.69E-01                     | 17.5     | 21.7     | 19.6    | 0.049  |
| nptna       | 368305  | neuroplastin a                                         | 1.94E-01                     | 4.67E-01                     | 17.5     | 18.0     | 17.8    | 0.049  |
| inadl       | 368723  | InaD-like (Drosophila)                                 | 4.78E-01                     | 2.71E-02                     | 22.0     | 19.0     | 20.5    | 0.049  |
| cecr1a      | 373884  | cat eye syndrome chromosome region, candidate 1a       | 2.02E-01                     | 4.52E-01                     | 13.3     | 15.3     | 14.3    | 0.049  |
| zgc:64114   | 378866  | zgc:64114                                              | 4.62E-01                     | 7.18E-02                     | 23.3     | 0.0      | 23.7    | 0.049  |
| zgc:56112   | 393164  | zgc:56112                                              | 1.10E-01                     | 4.71E-01                     | 14.0     | 16.0     | 15.0    | 0.049  |
| scg3        | 393730  | secretogranin III                                      | 4.65E-02                     | 4.88E-01                     | 15.2     | 14.8     | 15.0    | 0.049  |
| zgc:73273   | 393744  | zgc:73273                                              | 1.13E-02                     | 4.70E-01                     | 3.2      | 4.7      | 4.0     | 0.049  |
| eif4a3      | 394053  | eukaryotic translation initiation factor 4A, isoform 3 | 7.11E-02                     | 4.61E-01                     | 21.5     | 20.8     | 21.2    | 0.049  |
| zgc:63907   | 394112  | zgc:63907                                              | 4.61E-01                     | 4.01E-01                     | 10.8     | 14.0     | 12.4    | 0.049  |
| zgc:110591  | 402849  | zgc:110591                                             | 2.42E-01                     | 4.56E-01                     | 15.3     | 16.7     | 16.0    | 0.049  |
| evlb        | 402929  | Enah/Vasp-like b                                       | 4.81E-01                     | 4.36E-01                     | 12.5     | 10.2     | 11.4    | 0.049  |
| dao.3       | 402994  | D-amino-acid oxidase 3                                 | 4.64E-01                     | 1.24E-05                     | 3.2      | 5.5      | 4.4     | 0.049  |
| igfbp5a     | 403039  | insulin-like growth factor binding protein 5a          | 1.97E-01                     | 4.57E-01                     | 23.0     | 21.7     | 22.4    | 0.049  |
| b3galt2     | 404633  | UDP-Gal:betaGlcNAc beta 1,3-galactosyltransferase, po  | 2.82E-01                     | 4.96E-01                     | 14.8     | 15.3     | 15.1    | 0.049  |
| uros        | 404731  | uroporphyrinogen III synthase                          | 2.62E-01                     | 4.52E-01                     | 14.0     | 16.2     | 15.1    | 0.049  |
| mettl11a    | 405834  | methyltransferase like 11A                             | 4.68E-01                     | 4.92E-01                     | 23.3     | 2.5      | 0.9     | 0.049  |
| hnrnpk      | 406267  | heterogeneous nuclear ribonucleoprotein K              | 3.60E-02                     | 4.95E-01                     | 4.8      | 4.8      | 4.8     | 0.049  |
| rbm4.3      | 406277  | RNA binding motif protein 4.3                          | 4.27E-01                     | 4.98E-01                     | 1.7      | 21.0     | 23.4    | 0.049  |
| fubp1       | 406418  | far upstream element (FUSE) binding protein 1          | 4.24E-01                     | 4.96E-01                     | 17.2     | 20.5     | 18.9    | 0.049  |
| ptp4a3      | 406460  | protein tyrosine phosphatase type IVA, member 3        | 1.18E-01                     | 4.50E-01                     | 17.7     | 19.0     | 18.4    | 0.049  |
| zgc:63629   | 406676  | zgc:63629                                              | 1.20E-02                     | 4.58E-01                     | 15.8     | 17.8     | 16.8    | 0.049  |
| fam136a     | 406709  | family with sequence similarity 136, member A          | 8.10E-02                     | 4.95E-01                     | 0.5      | 2.0      | 1.3     | 0.049  |
| pla2g12b    | 406739  | phospholipase A2, group XIIB                           | 4.95E-01                     | 2.46E-01                     | 3.5      | 6.3      | 4.9     | 0.049  |
| serinc5     | 406835  | serine incorporator 5                                  | 1.90E-01                     | 4.63E-01                     | 12.3     | 13.2     | 12.8    | 0.049  |
| accn2a      | 407672  | amiloride-sensitive cation channel 2 a                 | 4.78E-01                     | 4.38E-01                     | 20.5     | 19.3     | 19.9    | 0.049  |
| zgc:91874   | 431735  | zgc:91874                                              | 6.45E-02                     | 4.62E-01                     | 22.8     | 0.5      | 23.7    | 0.049  |
| dusp22a     | 436787  | dual specificity phosphatase 22a                       | 4.69E-01                     | 4.32E-02                     | 11.2     | 15.7     | 13.5    | 0.049  |
| pir         | 436823  | pirin                                                  | 2.50E-02                     | 4.78E-01                     | 14.8     | 18.0     | 16.4    | 0.049  |



**Table S1: Zebrafish circadian oscillating genes**

| Gene Symbol | Gene ID | Gene Description                                         | Fisher's g test p value (LD) | Fisher's g test p value (DD) | LD Phase | DD Phase | Phase * | FDR ** |
|-------------|---------|----------------------------------------------------------|------------------------------|------------------------------|----------|----------|---------|--------|
| egln1       | 436868  | egl nine homolog 1 (C. elegans)                          | 4.80E-01                     | 4.51E-01                     | 17.0     | 19.3     | 18.2    | 0.049  |
| lrrc57      | 436900  | leucine rich repeat containing 57                        | 1.47E-02                     | 4.57E-01                     | 11.5     | 13.2     | 12.4    | 0.049  |
| wipi2       | 437002  | WD repeat domain, phosphoinositide interacting 2         | 3.06E-01                     | 4.86E-01                     | 13.8     | 16.0     | 14.9    | 0.049  |
| suds3       | 445099  | suppressor of defective silencing 3 homolog (SDS3, S. c  | 4.06E-01                     | 4.62E-01                     | 12.8     | 15.2     | 14.0    | 0.049  |
| capn9       | 445107  | calpain 9                                                | 1.12E-01                     | 4.67E-01                     | 1.8      | 4.7      | 3.3     | 0.049  |
| camk2d1     | 445208  | calcium/calmodulin-dependent protein kinase (CaM kina    | 4.50E-02                     | 4.79E-01                     | 6.8      | 8.8      | 7.8     | 0.049  |
| zgc:100942  | 445232  | zgc:100942                                               | 1.40E-01                     | 4.77E-01                     | 15.3     | 18.0     | 16.7    | 0.049  |
| cldn8       | 445278  | claudin 8                                                | 5.28E-02                     | 4.68E-01                     | 9.8      | 9.2      | 9.5     | 0.049  |
| zgc:92806   | 447829  | zgc:92806                                                | 4.60E-01                     | 4.28E-01                     | 18.7     | 19.7     | 19.2    | 0.049  |
| abhd3       | 447830  | abhydrolase domain containing 3                          | 8.27E-02                     | 4.70E-01                     | 1.2      | 1.8      | 1.5     | 0.049  |
| zgc:92353   | 447834  | zgc:92353                                                | 4.91E-01                     | 3.63E-02                     | 21.5     | 21.8     | 21.7    | 0.049  |
| cx47.1      | 447835  | connexin 47.1                                            | 4.53E-01                     | 2.95E-01                     | 22.0     | 0.7      | 23.4    | 0.049  |
| uck1        | 447928  | uridine-cytidine kinase 1                                | 1.73E-01                     | 4.99E-01                     | 16.2     | 14.5     | 15.4    | 0.049  |
| chga        | 450039  | chromogranin A                                           | 8.89E-02                     | 4.58E-01                     | 14.7     | 16.3     | 15.5    | 0.049  |
| alg14       | 450072  | asparagine-linked glycosylation 14 homolog (S. cerevisia | 6.49E-03                     | 4.62E-01                     | 1.7      | 0.7      | 1.2     | 0.049  |
| zgc:92107   | 492329  | zgc:92107                                                | 4.55E-01                     | 3.70E-01                     | 16.2     | 17.7     | 17.0    | 0.049  |
| gga3        | 492643  | golgi associated, gamma adaptin ear containing, ARF bir  | 2.74E-01                     | 4.58E-01                     | 15.2     | 13.7     | 14.5    | 0.049  |
| aldh16a1    | 492710  | aldehyde dehydrogenase 16 family, member A1              | 4.73E-01                     | 3.36E-01                     | 0.7      | 2.7      | 1.7     | 0.049  |
| pcdh2ab1    | 493589  | protocadherin 2 alpha b 1                                | 6.03E-02                     | 4.76E-01                     | 14.0     | 15.0     | 14.5    | 0.049  |
| stip1       | 493606  | stress-induced-phosphoprotein 1 (Hsp70/Hsp90-organizi    | 9.27E-02                     | 4.98E-01                     | 3.2      | 3.5      | 3.4     | 0.049  |
| net1        | 493607  | neuroepithelial cell transforming gene 1                 | 3.21E-01                     | 4.69E-01                     | 4.2      | 3.3      | 3.8     | 0.049  |
| xrg5        | 497102  | XK-related protein 5                                     | 2.02E-01                     | 4.96E-01                     | 15.0     | 17.2     | 16.1    | 0.049  |
| opa3        | 497278  | optic atrophy 3                                          | 3.54E-02                     | 4.90E-01                     | 0.0      | 0.8      | 0.4     | 0.049  |
| zgc:113200  | 503759  | zgc:113200                                               | 1.01E-01                     | 4.98E-01                     | 15.5     | 18.0     | 16.8    | 0.049  |
| im:7152917  | 504109  | im:7152917                                               | 4.86E-02                     | 4.52E-01                     | 16.8     | 18.7     | 17.8    | 0.049  |
| gpr22       | 504167  | G protein-coupled receptor 22                            | 2.37E-01                     | 4.51E-01                     | 13.5     | 14.6     | 14.0    | 0.049  |
| ghrhra      | 541314  | growth hormone releasing hormone receptor a              | 4.96E-01                     | 3.28E-01                     | 13.3     | 14.8     | 14.1    | 0.049  |
| gcsa        | 541329  | glycine cleavage system protein H (aminomethyl carrier)  | 4.94E-01                     | 3.18E-01                     | 0.3      | 2.7      | 1.5     | 0.049  |
| zgc:112998  | 541430  | zgc:112998                                               | 4.72E-01                     | 3.45E-01                     | 14.3     | 12.3     | 13.3    | 0.049  |
| sorbs3      | 541478  | sorbin and SH3 domain containing 3                       | 4.71E-01                     | 4.36E-03                     | 4.3      | 4.2      | 4.3     | 0.049  |
| zgc:113119  | 541480  | zgc:113119                                               | 4.76E-01                     | 4.17E-01                     | 14.0     | 14.2     | 14.1    | 0.049  |

**Table S1: Zebrafish circadian oscillating genes**

| Gene Symbol       | Gene ID | Gene Description                                         | Fisher's g test p value (LD) | Fisher's g test p value (DD) | LD Phase | DD Phase | Phase * | FDR ** |
|-------------------|---------|----------------------------------------------------------|------------------------------|------------------------------|----------|----------|---------|--------|
| snrpd2            | 550244  | small nuclear ribonucleoprotein D2 polypeptide           | 4.99E-01                     | 4.37E-01                     | 1.0      | 3.7      | 2.4     | 0.049  |
| cdk10             | 550285  | cyclin-dependent kinase 10                               | 4.33E-01                     | 4.66E-01                     | 21.2     | 23.8     | 22.5    | 0.049  |
| asb4              | 550321  | ankyrin repeat and SOCS box-containing 4                 | 3.52E-01                     | 4.73E-01                     | 15.7     | 18.3     | 17.0    | 0.049  |
| cyr6111           | 550346  | cysteine-rich, angiogenic inducer 61 like 1              | 4.94E-01                     | 2.98E-02                     | 11.5     | 18.5     | 15.0    | 0.049  |
| zgc:112104        | 550440  | zgc:112104                                               | 4.29E-02                     | 4.97E-01                     | 21.5     | 23.3     | 22.4    | 0.049  |
| zgc:110333        | 550497  | zgc:110333                                               | 2.42E-01                     | 4.56E-01                     | 10.3     | 11.3     | 10.8    | 0.049  |
| guf1              | 553030  | GUF1 GTPase homolog (S. cerevisiae)                      | 3.68E-02                     | 4.90E-01                     | 0.2      | 23.8     | 0.0     | 0.049  |
| dnmt8             | 553187  | DNA (cytosine-5-)-methyltransferase 8                    | 4.19E-02                     | 4.55E-01                     | 2.0      | 3.8      | 2.9     | 0.049  |
| bms1l             | 553241  | BMS1-like, ribosome assembly protein (yeast)             | 2.64E-02                     | 4.53E-01                     | 1.0      | 2.8      | 1.9     | 0.049  |
| zgc:152896        | 553288  | zgc:152896                                               | 4.71E-01                     | 3.79E-01                     | 22.8     | 1.3      | 0.1     | 0.049  |
| si:ch73-167c12.2  | 553421  | si:ch73-167c12.2                                         | 3.56E-02                     | 4.68E-01                     | 15.7     | 16.2     | 16.0    | 0.049  |
| si:ch211-235e18.3 | 553465  | si:ch211-235e18.3                                        | 2.82E-01                     | 4.51E-01                     | 17.8     | 18.3     | 18.1    | 0.049  |
| trit1             | 553523  | tRNA isopentenyltransferase 1                            | 2.36E-01                     | 4.70E-01                     | 21.3     | 0.7      | 23.0    | 0.049  |
| zgc:110664        | 553647  | zgc:110664                                               | 2.60E-01                     | 4.91E-01                     | 23.7     | 2.8      | 1.3     | 0.049  |
| zgc:112332        | 553712  | zgc:112332                                               | 3.77E-01                     | 4.90E-01                     | 9.0      | 11.7     | 10.4    | 0.049  |
| nr3c1             | 553740  | nuclear receptor subfamily 3, group C, member 1 (glucoc  | 9.27E-03                     | 4.58E-01                     | 13.1     | 14.4     | 13.7    | 0.049  |
| zgc:113184        | 553745  | zgc:113184                                               | 2.16E-02                     | 4.81E-01                     | 9.2      | 10.2     | 9.7     | 0.049  |
| zgc:110708        | 553793  | zgc:110708                                               | 5.00E-01                     | 4.01E-01                     | 13.8     | 15.3     | 14.6    | 0.049  |
| si:ch211-279I9.6  | 555701  | si:ch211-279I9.6                                         | 3.37E-01                     | 4.98E-01                     | 1.3      | 0.7      | 1.0     | 0.049  |
| akap1b            | 556208  | A kinase (PRKA) anchor protein 1b                        | 4.98E-02                     | 4.90E-01                     | 21.3     | 22.0     | 21.7    | 0.049  |
| si:ch211-192p3.1  | 556298  | si:ch211-192p3.1                                         | 3.36E-02                     | 4.83E-01                     | 10.5     | 13.5     | 12.0    | 0.049  |
| zgc:161973        | 556635  | zgc:161973                                               | 7.14E-03                     | 4.81E-01                     | 4.0      | 0.5      | 2.3     | 0.049  |
| irf2bp1           | 556852  | interferon regulatory factor 2 binding protein 1         | 4.86E-01                     | 2.03E-01                     | 15.2     | 19.3     | 17.3    | 0.049  |
| si:dkey-120m5.1   | 557744  | si:dkey-120m5.1                                          | 2.37E-02                     | 4.64E-01                     | 16.3     | 18.7     | 17.5    | 0.049  |
| emd               | 558212  | emerin (Emery-Dreifuss muscular dystrophy)               | 1.28E-01                     | 4.70E-01                     | 5.2      | 5.0      | 5.1     | 0.049  |
| cdc42ep1          | 558275  | CDC42 effector protein (Rho GTPase binding) 1            | 4.65E-01                     | 2.10E-01                     | 6.8      | 6.8      | 6.8     | 0.049  |
| LOC558375         | 558375  | tripartite motif-containing protein 16-like              | 4.43E-01                     | 4.62E-01                     | 15.0     | 17.0     | 16.0    | 0.049  |
| LOC558402         | 558402  | novel protein similar to vertebrate anaphase promoting c | 4.99E-01                     | 6.30E-02                     | 15.3     | 14.3     | 14.8    | 0.049  |
| si:ch211-127h20.2 | 558635  | si:ch211-127h20.2                                        | 4.69E-01                     | 9.22E-03                     | 16.3     | 18.5     | 17.4    | 0.049  |
| macc1             | 558777  | metastasis associated in colon cancer 1                  | 4.64E-01                     | 4.82E-01                     | 5.8      | 5.8      | 5.8     | 0.049  |
| im:7136185        | 559152  | im:7136185                                               | 3.19E-01                     | 4.93E-01                     | 10.8     | 14.8     | 12.8    | 0.049  |

**Table S1: Zebrafish circadian oscillating genes**

| Gene Symbol       | Gene ID | Gene Description                                                | Fisher's g test p value (LD) | Fisher's g test p value (DD) | LD Phase | DD Phase | Phase * | FDR ** |
|-------------------|---------|-----------------------------------------------------------------|------------------------------|------------------------------|----------|----------|---------|--------|
| si:dkey-205h13.2  | 561081  | si:dkey-205h13.2                                                | 1.20E-02                     | 4.90E-01                     | 16.0     | 18.2     | 17.1    | 0.049  |
| zgc:153218        | 561673  | zgc:153218                                                      | 4.69E-01                     | 4.23E-01                     | 17.3     | 19.8     | 18.6    | 0.049  |
| zgc:114097        | 561675  | zgc:114097                                                      | 2.27E-01                     | 4.81E-01                     | 18.5     | 15.8     | 17.2    | 0.049  |
| ints1             | 562131  | integrator complex subunit 1                                    | 8.60E-02                     | 4.98E-01                     | 15.8     | 17.7     | 16.8    | 0.049  |
| zgc:154088        | 562137  | zgc:154088                                                      | 1.23E-01                     | 4.69E-01                     | 14.5     | 16.2     | 15.4    | 0.049  |
| si:dkeyp-59a8.4   | 562918  | si:dkeyp-59a8.4                                                 | 1.12E-01                     | 4.64E-01                     | 14.2     | 15.7     | 15.0    | 0.049  |
| ankhd1            | 563327  | ankyrin repeat and KH domain containing 1                       | 4.32E-01                     | 4.56E-01                     | 22.2     | 19.3     | 20.8    | 0.049  |
| rhcg2a            | 563826  | Rh type C glycoprotein2a                                        | 2.81E-01                     | 4.54E-01                     | 5.2      | 4.3      | 4.8     | 0.049  |
| shdb              | 564537  | Src homology 2 domain containing transforming protein I         | 2.90E-01                     | 4.79E-01                     | 16.7     | 17.7     | 17.2    | 0.049  |
| zgc:114081        | 564984  | zgc:114081                                                      | 4.93E-01                     | 1.80E-01                     | 15.3     | 10.3     | 12.8    | 0.049  |
| tjp2a             | 565446  | tight junction protein 2a (zona occludens 2)                    | 5.96E-02                     | 4.51E-01                     | 8.2      | 8.2      | 8.2     | 0.049  |
| apba1             | 565507  | amyloid beta (A4) precursor protein-binding, family A, member 1 | 4.81E-01                     | 7.12E-02                     | 17.7     | 15.3     | 16.5    | 0.049  |
| si:ch211-206k20.5 | 565648  | si:ch211-206k20.5                                               | 4.57E-01                     | 1.57E-01                     | 12.8     | 11.3     | 12.1    | 0.049  |
| zgc:114173        | 566797  | zgc:114173                                                      | 4.45E-01                     | 4.69E-01                     | 16.2     | 11.2     | 13.7    | 0.049  |
| gfpt1             | 567861  | glutamine-fructose-6-phosphate transaminase 1                   | 1.23E-01                     | 4.63E-01                     | 2.2      | 3.3      | 2.8     | 0.049  |
| cog5              | 567886  | component of oligomeric golgi complex 5                         | 8.42E-03                     | 4.99E-01                     | 20.7     | 20.3     | 20.5    | 0.049  |
| bcar1             | 568309  | breast cancer anti-estrogen resistance 1                        | 4.07E-01                     | 4.77E-01                     | 16.5     | 17.7     | 17.1    | 0.049  |
| ctsbb             | 569298  | capthepsin B, b                                                 | 2.46E-01                     | 4.67E-01                     | 14.5     | 13.5     | 14.0    | 0.049  |
| serinc2           | 569338  | serine incorporator 2                                           | 7.35E-02                     | 4.51E-01                     | 15.7     | 18.0     | 16.9    | 0.049  |
| dmxl2             | 569435  | Dmx-like 2                                                      | 4.68E-01                     | 7.45E-02                     | 23.3     | 18.0     | 20.7    | 0.049  |
| usp16             | 569700  | ubiquitin specific protease 16                                  | 4.65E-01                     | 8.47E-04                     | 0.2      | 22.8     | 23.5    | 0.049  |
| zgc:165534        | 569719  | zgc:165534                                                      | 4.13E-02                     | 4.54E-01                     | 7.0      | 4.2      | 5.6     | 0.049  |
| ttc21b            | 569823  | tetratricopeptide repeat domain 21B                             | 9.97E-02                     | 4.83E-01                     | 11.2     | 12.8     | 12.0    | 0.049  |
| si:dkey-153k10.12 | 570295  | si:dkey-153k10.12                                               | 4.84E-01                     | 4.60E-02                     | 12.8     | 15.8     | 14.3    | 0.049  |
| lsm7              | 573047  | LSM7 homolog, U6 small nuclear RNA associated (S. cerevisiae)   | 1.86E-01                     | 4.58E-01                     | 4.7      | 5.0      | 4.9     | 0.049  |
| rippy3            | 654448  | rippy3                                                          | 4.36E-01                     | 4.97E-01                     | 4.5      | 2.2      | 3.4     | 0.049  |
| zgc:136963        | 664694  | zgc:136963                                                      | 4.80E-01                     | 1.07E-02                     | 1.3      | 2.7      | 2.0     | 0.049  |
| zgc:136971        | 678599  | zgc:136971                                                      | 4.89E-01                     | 3.03E-01                     | 15.0     | 16.8     | 15.9    | 0.049  |
| zgc:136597        | 692315  | zgc:136597                                                      | 4.55E-01                     | 4.15E-01                     | 15.7     | 17.0     | 16.4    | 0.049  |
| mrps14            | 751639  | mitochondrial ribosomal protein S14                             | 4.71E-01                     | 1.03E-01                     | 1.0      | 4.8      | 2.9     | 0.049  |
| zgc:153184        | 751652  | zgc:153184                                                      | 1.88E-01                     | 4.96E-01                     | 23.5     | 5.2      | 2.4     | 0.049  |

**Table S1: Zebrafish circadian oscillating genes**

| Gene Symbol      | Gene ID   | Gene Description                                      | Fisher's g test p value (LD) | Fisher's g test p value (DD) | LD Phase | DD Phase | Phase * | FDR ** |
|------------------|-----------|-------------------------------------------------------|------------------------------|------------------------------|----------|----------|---------|--------|
| zgc:153662       | 751665    | zgc:153662                                            | 4.94E-01                     | 4.86E-02                     | 8.8      | 9.7      | 9.3     | 0.049  |
| zgc:153251       | 751671    | zgc:153251                                            | 2.64E-02                     | 4.75E-01                     | 12.5     | 15.3     | 13.9    | 0.049  |
| tmem14c          | 751728    | transmembrane protein 14C                             | 2.97E-01                     | 4.91E-01                     | 2.5      | 3.2      | 2.9     | 0.049  |
| urah             | 751742    | HIU hydrolase                                         | 1.81E-02                     | 4.64E-01                     | 6.2      | 5.5      | 5.9     | 0.049  |
| mrps6            | 751746    | mitochondrial ribosomal protein S6                    | 1.57E-01                     | 4.68E-01                     | 0.0      | 2.2      | 1.1     | 0.049  |
| zgc:153704       | 767759    | zgc:153704                                            | 1.13E-01                     | 4.70E-01                     | 9.7      | 9.0      | 9.4     | 0.049  |
| zgc:154086       | 768184    | zgc:154086                                            | 4.70E-01                     | 2.59E-01                     | 1.2      | 2.5      | 1.9     | 0.049  |
| zgc:153060       | 768200    | zgc:153060                                            | 8.70E-02                     | 4.52E-01                     | 23.3     | 1.8      | 0.6     | 0.049  |
| zgc:153377       | 768305    | zgc:153377                                            | 2.03E-01                     | 4.76E-01                     | 23.0     | 2.7      | 0.9     | 0.049  |
| rnf115           | 790928    | ring finger protein 115                               | 1.75E-03                     | 4.89E-01                     | 15.2     | 16.0     | 15.6    | 0.049  |
| LOC793689        | 793689    | hypothetical protein LOC793689                        | 4.58E-01                     | 3.34E-04                     | 11.7     | 14.7     | 13.2    | 0.049  |
| LOC793763        | 793763    | transmembrane protein 151B-like                       | 4.21E-01                     | 4.77E-01                     | 15.7     | 16.0     | 15.9    | 0.049  |
| im:6894391       | 793937    | im:6894391                                            | 3.49E-01                     | 4.62E-01                     | 7.7      | 6.2      | 7.0     | 0.049  |
| LOC794214        | 794214    | protein NLRC3-like                                    | 3.50E-01                     | 4.58E-01                     | 13.8     | 15.7     | 14.8    | 0.049  |
| tfpt             | 796934    | TCF3 fusion partner homolog                           | 1.16E-02                     | 4.64E-01                     | 12.7     | 15.8     | 14.3    | 0.049  |
| zgc:171711       | 797287    | zgc:171711                                            | 4.83E-01                     | 4.02E-01                     | 13.8     | 14.7     | 14.3    | 0.049  |
| si:dkey-236e20.7 | 798655    | si:dkey-236e20.7                                      | 2.95E-01                     | 4.64E-01                     | 16.2     | 16.8     | 16.5    | 0.049  |
| LOC10000832      | 10000832  | zinc-binding protein A33-like                         | 5.92E-04                     | 4.79E-01                     | 13.3     | 16.0     | 14.7    | 0.049  |
| org              | 10001110  | oogenesis-related gene                                | 4.77E-01                     | 7.21E-02                     | 2.0      | 2.3      | 2.2     | 0.049  |
| taf7             | 10002261  | TAF7 RNA polymerase II, TATA box binding protein (TBI | 1.06E-01                     | 4.56E-01                     | 16.7     | 18.3     | 17.5    | 0.049  |
| LOC10002505      | 10002505  | MAP7 domain-containing protein 2-like                 | 3.31E-01                     | 4.82E-01                     | 23.3     | 21.5     | 22.4    | 0.049  |
| si:ch73-78i5.3   | 10003752  | si:ch73-78i5.3                                        | 1.42E-01                     | 4.96E-01                     | 14.8     | 15.5     | 15.2    | 0.049  |
| cdx1b            | 10004956  | caudal type homeobox 1 b                              | 6.30E-02                     | 4.76E-01                     | 13.7     | 15.0     | 14.4    | 0.049  |
| LOC10005871      | 10005871  | tripartite motif-containing protein 16-like           | 1.35E-01                     | 4.61E-01                     | 14.5     | 18.3     | 16.4    | 0.049  |
| LOC10007966      | 10007966  | zinc finger protein 567-like                          | 4.92E-01                     | 5.42E-02                     | 9.7      | 8.7      | 9.2     | 0.049  |
| zgc:162612       | 100037333 | zgc:162612                                            | 9.02E-02                     | 4.56E-01                     | 16.7     | 18.5     | 17.6    | 0.049  |
| zgc:165608       | 100073339 | zgc:165608                                            | 3.49E-02                     | 4.50E-01                     | 15.7     | 19.3     | 17.5    | 0.049  |
| zgc:165601       | 100073344 | zgc:165601                                            | 2.44E-01                     | 4.53E-01                     | 15.7     | 18.0     | 16.9    | 0.049  |
| fdx1             | 100126232 | ferredoxin 1                                          | 1.75E-01                     | 4.74E-01                     | 2.3      | 2.3      | 2.3     | 0.049  |
| si:dkey-170o10.3 | 100137123 | si:dkey-170o10.3                                      | 2.10E-01                     | 4.87E-01                     | 0.8      | 1.3      | 1.1     | 0.049  |
| zgc:171356       | 100144565 | zgc:171356                                            | 6.68E-02                     | 4.70E-01                     | 1.2      | 0.3      | 0.8     | 0.049  |

**Table S1: Zebrafish circadian oscillating genes**

| Gene Symbol       | Gene ID   | Gene Description                                    | Fisher's g test p value (LD) | Fisher's g test p value (DD) | LD Phase | DD Phase | Phase * | FDR ** |
|-------------------|-----------|-----------------------------------------------------|------------------------------|------------------------------|----------|----------|---------|--------|
| si:ch211-202h22.8 | 100307107 | si:ch211-202h22.8                                   | 3.72E-01                     | 4.71E-01                     | 2.5      | 3.8      | 3.2     | 0.049  |
| LOC100329265      | 100329265 | hypothetical protein LOC100329265                   | 1.05E-03                     | 4.86E-01                     | 23.0     | 0.2      | 23.6    | 0.049  |
| gpam              | 100332911 | glycerol-3-phosphate acyltransferase, mitochondrial | 4.62E-01                     | 1.17E-01                     | 15.0     | 16.2     | 15.6    | 0.049  |
| LOC100333916      | 100333916 | myomegalin-like                                     | 4.61E-01                     | 3.11E-01                     | 16.7     | 17.3     | 17.0    | 0.049  |

\* The mean circadian phases under LD and DD are used to represent the circadian phases of ZCOGs

\*\* False Discovery Rate
