# Supplementary material for: Analysis of a Gene Regulatory Cascade Mediating Circadian Rhythm in Zebrafish
Source: PubMed Central journal article supplement (PMC3585402; doi:10.1371/journal.pcbi.1002940), 2013-02-28
Supplement: pcbi.1002940.s007.pdf [file pcbi.1002940.s007.pdf]

**Table S2: Functional enrichment of ZCOGs (P <0.01)**

| Term Type     | Term ID     | Included gene number | Fisher P_Value | Odds Ratio | Term Name                                             |
|---------------|-------------|----------------------|----------------|------------|-------------------------------------------------------|
| Gene Ontology | GO:0009416  | 20                   | 2.17E-06       | 4.95       | response to light stimulus                            |
| Gene Ontology | GO:0009648  | 9                    | 9.61E-06       | 19.92      | photoperiodism                                        |
| Gene Ontology | GO:0009628  | 26                   | 1.96E-03       | 2.18       | response to abiotic stimulus                          |
| Gene Ontology | GO:0007623  | 7                    | 2.44E-03       | 6.18       | circadian rhythm                                      |
| Gene Ontology | GO:0022857  | 33                   | 4.46E-03       | 1.86       | transmembrane transporter activity                    |
| Gene Ontology | GO:0005215  | 34                   | 5.68E-03       | 1.80       | transporter activity                                  |
| Gene Ontology | GO:0017076  | 9                    | 5.88E-03       | 3.62       | purine nucleotide binding                             |
| Gene Ontology | GO:0022890  | 13                   | 6.44E-03       | 2.74       | inorganic cation transmembrane transporter activity   |
| Gene Ontology | GO:0048546  | 8                    | 6.74E-03       | 3.93       | digestive tract morphogenesis                         |
| Gene Ontology | GO:0015840  | 6                    | 7.88E-03       | 5.30       | urea transport                                        |
| Gene Ontology | GO:0030522  | 6                    | 7.88E-03       | 5.30       | intracellular receptor mediated signaling pathway     |
| Gene Ontology | GO:0042886  | 6                    | 7.88E-03       | 5.30       | amide transport                                       |
| Gene Ontology | GO:0022891  | 29                   | 8.60E-03       | 1.84       | substrate-specific transmembrane transporter activity |
| KEGG Pathway  | dre04710    | 21                   | 2.87E-10       | 11.18      | Circadian rhythm - mammal                             |
| KEGG Pathway  | dre03050    | 22                   | 8.88E-05       | 3.19       | Proteasome                                            |
| KEGG Pathway  | dre04146    | 27                   | 6.09E-04       | 2.35       | Peroxisome                                            |
| KEGG Pathway  | dre03008    | 24                   | 1.90E-03       | 2.25       | Ribosome biogenesis in eukaryotes                     |
| KEGG Pathway  | dre00980    | 15                   | 2.02E-03       | 2.99       | Metabolism of xenobiotics by cytochrome P450          |
| Tissues       | ZFA:0000143 | 46                   | 2.98E-09       | 3.45       | retinal photoreceptor layer                           |
| Tissues       | ZFA:0001076 | 68                   | 3.81E-07       | 2.24       | intestinal bulb                                       |
| Tissues       | ZFA:0001678 | 160                  | 2.73E-06       | 1.61       | immature eye                                          |
| Tissues       | ZFA:0000152 | 267                  | 3.00E-06       | 1.46       | retina                                                |
| Tissues       | ZFA:0009262 | 16                   | 3.59E-06       | 6.34       | retinal cone cell                                     |
| Tissues       | ZFA:0000279 | 86                   | 4.81E-05       | 1.74       | segmental plate                                       |
| Tissues       | ZFA:0000088 | 120                  | 5.06E-05       | 1.60       | YSL                                                   |
| Tissues       | ZFA:0001357 | 96                   | 5.84E-05       | 1.68       | alar plate midbrain region                            |
| Tissues       | ZFA:0000155 | 224                  | 7.75E-05       | 1.40       | somite                                                |
| Tissues       | ZFA:0001056 | 146                  | 1.29E-04       | 1.49       | myotome                                               |
| Tissues       | ZFA:0000123 | 211                  | 1.33E-04       | 1.40       | liver                                                 |
| Tissues       | ZFA:0001464 | 17                   | 3.18E-04       | 3.37       | retinal outer nuclear layer                           |
| Tissues       | ZFA:0000019 | 101                  | 5.19E-04       | 1.54       | epiphysis                                             |
| Tissues       | ZFA:0000095 | 137                  | 1.14E-03       | 1.41       | pharyngeal arch 3-7 skeleton                          |
| Tissues       | ZFA:0000112 | 134                  | 1.93E-03       | 1.39       | gut                                                   |
| Tissues       | ZFA:0001130 | 4                    | 5.30E-03       | 17.30      | pharyngeal pouch 2                                    |

**Table S2: Functional enrichment of ZCOGs (P <0.01)**

| Term Type | Term ID     | Included gene number | Fisher P_Value | Odds Ratio | Term Name                           |
|-----------|-------------|----------------------|----------------|------------|-------------------------------------|
| Tissues   | ZFA:0001390 | 30                   | 6.36E-03       | 1.87       | pancreatic bud                      |
| Tissues   | ZFA:0000119 | 55                   | 6.78E-03       | 1.57       | retinal inner nuclear layer         |
| Tissues   | ZFA:0000132 | 110                  | 8.31E-03       | 1.36       | neural plate                        |
| Tissues   | ZFA:0000173 | 6                    | 8.51E-03       | 5.20       | bulbus arteriosus                   |
| Tissues   | ZFA:0001621 | 6                    | 8.51E-03       | 5.20       | pronephric proximal straight tubule |
