# Supplementary material for: Analysis of a Gene Regulatory Cascade Mediating Circadian Rhythm in Zebrafish
Source: PubMed Central journal article supplement (PMC3585402; doi:10.1371/journal.pcbi.1002940), 2013-02-28
Supplement: pcbi.1002940.s008.pdf [file pcbi.1002940.s008.pdf]

**Table S3: ZCOGs with mouse circadian gene homologs.**

| <b>Mouse</b>  |                       |                                                   | <b>Mouse</b>      | <b>Zebrafish</b>  |
|---------------|-----------------------|---------------------------------------------------|-------------------|-------------------|
| <b>Gene</b>   | <b>Zebrafish Gene</b> |                                                   | <b>Gene phase</b> | <b>Gene phase</b> |
| <b>Symbol</b> | <b>Symbol</b>         | <b>Evidence</b>                                   |                   |                   |
| Acs1          | zgc:101071            | NCBI HomoloGene,Ensembl Orthology                 | 7.2               | 0.7               |
| Acs1          | acs1                  | Inparanoid,NCBI HomoloGene,Ensembl Orthology      | 7.2               | 4.0               |
| Acs15         | acs15                 | Inparanoid,NCBI HomoloGene,ZFIN,Ensembl Orthology | 1.4               | 5.1               |
| Arntl         | arntl1b               | ZFIN,Ensembl Orthology                            | 22.4              | 12.8              |
| Arntl         | arntl1a               | Inparanoid,ZFIN,Ensembl Orthology                 | 22.4              | 13.4              |
| Cdkn1a        | LOC100004175          | Ensembl Possible Orthology                        | 22.4              | 3.5               |
| Cirbp         | cirbp                 | Ensembl Orthology                                 | 5.8               | 16.5              |
| Clock         | clock3                | ZFIN,Ensembl Orthology                            | 23.4              | 15.1              |
| Clock         | clock                 | Inparanoid,NCBI HomoloGene,ZFIN,Ensembl Orthology | 23.4              | 15.1              |
| Cry1          | cry1b                 | ZFIN,Ensembl Possible Orthology                   | 18.0              | 6.5               |
| Cry1          | cry5                  | Ensembl Possible Orthology                        | 18.0              | 4.0               |
| Cry1          | cry-dash              | Ensembl Possible Orthology                        | 18.0              | 3.6               |
| Cry1          | cry2a                 | NCBI HomoloGene,Ensembl Orthology                 | 18.0              | 13.3              |
| Cry1          | cry4                  | Ensembl Possible Orthology                        | 18.0              | 14.3              |
| Cry1          | cry2b                 | Ensembl Possible Orthology                        | 18.0              | 14.1              |
| Dbp           | dbpb                  | Ensembl Orthology                                 | 9.2               | 23.3              |
| Dnaja1        | dnaja1l               | Inparanoid,NCBI HomoloGene,Ensembl Orthology      | 17.0              | 4.9               |
| Ei24          | zgc:110605            | Inparanoid,NCBI HomoloGene,Ensembl Orthology      | 1.1               | 13.6              |
| Eif1a         | eif1axa               | Ensembl Possible Orthology                        | 20.9              | 1.8               |
| Elov5         | zgc:153394            | Ensembl Possible Orthology                        | 21.8              | 2.3               |
| Ephx1         | ephx1                 | Inparanoid,NCBI HomoloGene,Ensembl Orthology      | 9.7               | 6.8               |
| Fus           | fus                   | Inparanoid,NCBI HomoloGene,ZFIN,Ensembl Orthology | 4.8               | 15.0              |
| Gja1          | cx43                  | Inparanoid,NCBI HomoloGene,ZFIN,Ensembl Orthology | 1.1               | 1.8               |
| Gja1          | cx28.9                | Ensembl Possible Orthology                        | 1.1               | 0.4               |
| Gja1          | cx32.3                | Ensembl Possible Orthology                        | 1.1               | 0.3               |
| Glul          | glulb                 | Inparanoid,NCBI HomoloGene,ZFIN,Ensembl Orthology | 16.9              | 6.3               |
| Glul          | glula                 | ZFIN,Ensembl Possible Orthology                   | 16.9              | 4.9               |
| Hmgb3         | hmgb1a                | Ensembl Orthology                                 | 6.1               | 17.8              |
| Hmgb3         | hmgb3b                | NCBI HomoloGene,ZFIN                              | 6.1               | 3.7               |
| Hsp90aa1      | hsp90a.1              | Ensembl Orthology                                 | 19.7              | 2.4               |
| Hsp90aa1      | hsp90a.2              | Inparanoid,NCBI HomoloGene,Ensembl Orthology      | 19.7              | 4.3               |
| Hsp90ab1      | hsp90ab1              | Inparanoid,NCBI HomoloGene,ZFIN,Ensembl Orthology | 19.8              | 16.7              |
| Litaf         | si:ch211-202h22.8     | Ensembl Possible Orthology                        | 1.4               | 3.2               |
| Mid1ip1       | mid1ip1               | Ensembl Possible Orthology                        | 14.3              | 3.7               |

**Table S3: ZCOGs with mouse circadian gene homologs.**

| <b>Mouse</b>  |                       |                                                   | <b>Mouse</b>      | <b>Zebrafish</b>  |
|---------------|-----------------------|---------------------------------------------------|-------------------|-------------------|
| <b>Gene</b>   | <b>Zebrafish Gene</b> |                                                   | <b>Gene phase</b> | <b>Gene phase</b> |
| <b>Symbol</b> | <b>Symbol</b>         | <b>Evidence</b>                                   |                   |                   |
| Mmp14         | mmp14a                | ZFIN,Ensembl Orthology                            | 1.0               | 17.7              |
| Mmp14         | mmp14b                | Inparanoid,NCBI HomoloGene,ZFIN,Ensembl Orthology | 1.0               | 15.5              |
| Net1          | net1                  | Inparanoid,NCBI HomoloGene,Ensembl Orthology      | 6.5               | 3.8               |
| Nfe2l2        | nfe2l2                | Inparanoid,NCBI HomoloGene,ZFIN,Ensembl Orthology | 12.8              | 7.1               |
| Nfil3         | nfil3-6               | Ensembl Possible Orthology                        | 20.3              | 5.9               |
| Nfil3         | nfil3                 | Inparanoid,NCBI HomoloGene,ZFIN,Ensembl Orthology | 20.3              | 14.4              |
| Nr1d1         | nr1d4b                | Ensembl Possible Orthology                        | 6.2               | 19.8              |
| Nr1d1         | nr1d1                 | Inparanoid,NCBI HomoloGene,ZFIN,Ensembl Orthology | 6.2               | 23.8              |
| Nr1d1         | nr1d4a                | Ensembl Possible Orthology                        | 6.2               | 19.8              |
| Nr1d2         | nr1d4a                | Ensembl Possible Orthology                        | 9.6               | 19.8              |
| Nr1d2         | nr1d4b                | Ensembl Possible Orthology                        | 9.6               | 19.8              |
| P4ha1         | p4ha1b                | Inparanoid,Ensembl Possible Orthology             | 17.5              | 1.3               |
| Pdxk          | pdxka                 | Inparanoid,NCBI HomoloGene,ZFIN,Ensembl Orthology | 13.3              | 6.3               |
| Per1          | per1b                 | Inparanoid,NCBI HomoloGene,ZFIN,Ensembl Orthology | 11.4              | 3.3               |
| Per1          | per1a                 | NCBI HomoloGene,ZFIN,Ensembl Orthology            | 11.4              | 1.0               |
| Per2          | per2                  | Inparanoid,NCBI HomoloGene,ZFIN,Ensembl Orthology | 13.2              | 7.5               |
| Per3          | per3                  | Inparanoid,NCBI HomoloGene,ZFIN,Ensembl Orthology | 11.4              | 4.2               |
| Pim3          | zgc:113028            | Ensembl Orthology                                 | 8.1               | 13.4              |
| Pnp           | pnp5b                 | NCBI HomoloGene,Ensembl Orthology                 | 19.9              | 0.9               |
| Pnp           | pnp4b                 | NCBI HomoloGene,Ensembl Possible Orthology        | 19.9              | 6.1               |
| Pnp           | pnp5a                 | NCBI HomoloGene,Ensembl Orthology                 | 19.9              | 6.5               |
| Pnp           | pnp6                  | NCBI HomoloGene,Ensembl Possible Orthology        | 19.9              | 2.8               |
| Ppp1r3c       | ppp1r3cb              | Inparanoid,NCBI HomoloGene,ZFIN,Ensembl Orthology | 20.8              | 10.6              |
| Prkar1a       | prkar1aa              | Ensembl Orthology                                 | 2.5               | 15.3              |
| Psm11         | psmd11b               | NCBI HomoloGene,ZFIN,Ensembl Orthology            | 10.0              | 16.5              |
| Rorc          | rorca                 | ZFIN                                              | 18.3              | 10.8              |
| Rorc          | rorcb                 | ZFIN                                              | 18.3              | 12.4              |
| Sbk1          | LOC557524             | Ensembl Possible Orthology                        | 17.8              | 23.8              |
| Serpinh1      | hsp47                 | NCBI HomoloGene,ZFIN,Ensembl Orthology            | 20.1              | 5.0               |
| Serpinh1      | zgc:171630            | Inparanoid,NCBI HomoloGene,Ensembl Orthology      | 20.1              | 4.6               |
| Slc4a4        | slc4a4a               | Inparanoid,NCBI HomoloGene,ZFIN,Ensembl Orthology | 6.8               | 4.5               |
| St13          | st13                  | Inparanoid,NCBI HomoloGene,ZFIN,Ensembl Orthology | 19.3              | 7.6               |
| Sult1a1       | sult1st2              | NCBI HomoloGene                                   | 17.1              | 5.6               |
| Sult1a1       | sult1st6              | Ensembl Possible Orthology                        | 17.1              | 4.2               |

**Table S3: ZCOGs with mouse circadian gene homologs.**

| <b>Mouse Gene Symbol</b> | <b>Zebrafish Gene Symbol</b> | <b>Evidence</b>                                   | <b>Mouse Gene phase</b> | <b>Zebrafish Gene phase</b> |
|--------------------------|------------------------------|---------------------------------------------------|-------------------------|-----------------------------|
| Sult1a1                  | sult1st3                     | NCBI HomoloGene                                   | 17.1                    | 5.2                         |
| Tef                      | tefa                         | Inparanoid,NCBI HomoloGene,ZFIN,Ensembl Orthology | 11.5                    | 3.4                         |
| Tef                      | tefb                         | Ensembl Orthology                                 | 11.5                    | 1.9                         |
| Tsc22d3                  | tsc22d3                      | Inparanoid,ZFIN,Ensembl Orthology                 | 15.7                    | 8.6                         |
| Ubc                      | ubc                          | ZFIN,Ensembl Orthology                            | 20.8                    | 15.8                        |
| Ubc                      | ubb                          | NCBI HomoloGene                                   | 20.8                    | 13.8                        |
| Xbp1                     | xbp1                         | Inparanoid,NCBI HomoloGene,ZFIN,Ensembl Orthology | 16.4                    | 2.9                         |
| Znrf2                    | znrf2b                       | Inparanoid,ZFIN                                   | 2.8                     | 3.3                         |
