# Supplementary material for: Analysis of a Gene Regulatory Cascade Mediating Circadian Rhythm in Zebrafish
Source: PubMed Central journal article supplement (PMC3585402; doi:10.1371/journal.pcbi.1002940), 2013-02-28
Supplement: pcbi.1002940.s009.pdf [file pcbi.1002940.s009.pdf]

**Table S4: Genes affected by light entrainment.**

| Gene ID   | Symbol            | LD Phase | P value * | Light-Entrainment  |
|-----------|-------------------|----------|-----------|--------------------|
| 336492    | ptgds             | 7.8      | 1.56E-13  | Fast Light-Induced |
| 492491    | zgc:103654        | 7.7      | 4.29E-13  | Fast Light-Induced |
| 450011    | tspo              | 7.8      | 1.88E-12  | Fast Light-Induced |
| 402868    | pnp0              | 4.8      | 1.42E-11  | Fast Light-Induced |
| 550383    | npepl1            | 5.8      | 1.64E-11  | Fast Light-Induced |
| 569875    | zgc:112356        | 7.7      | 2.20E-11  | Fast Light-Induced |
| 751701    | zgc:153154        | 7.8      | 5.21E-11  | Fast Light-Induced |
| 337526    | wu:fj81c05        | 7.2      | 8.23E-11  | Fast Light-Induced |
| 394146    | dusp4             | 6.5      | 1.62E-10  | Fast Light-Induced |
| 373866    | cbr1              | 5.8      | 3.50E-10  | Fast Light-Induced |
| 553538    | loxl3             | 7.3      | 5.16E-10  | Fast Light-Induced |
| 557970    | surf1             | 5.2      | 6.28E-10  | Fast Light-Induced |
| 324373    | zgc:77513         | 8        | 6.70E-10  | Fast Light-Induced |
| 100000596 | LOC100000596      | 8        | 1.14E-09  | Fast Light-Induced |
| 140431    | guca1b            | 7        | 1.29E-09  | Fast Light-Induced |
| 560667    | mtrr              | 3.8      | 3.44E-09  | Fast Light-Induced |
| 57969     | copz2             | 6.8      | 3.55E-09  | Fast Light-Induced |
| 768159    | si:ch211-195b13.1 | 5.8      | 3.79E-09  | Fast Light-Induced |
| 664750    | ppox              | 6        | 5.99E-09  | Fast Light-Induced |
| 563732    | uts1              | 6.7      | 6.09E-09  | Fast Light-Induced |
| 393186    | zgc:56235         | 7.2      | 6.69E-09  | Fast Light-Induced |
| 797793    | LOC797793         | 6.5      | 7.81E-09  | Fast Light-Induced |
| 352918    | opn4l             | 7        | 1.16E-08  | Fast Light-Induced |
| 84041     | bcdo2l            | 6.8      | 1.18E-08  | Fast Light-Induced |
| 393666    | arl3l1            | 6.5      | 1.51E-08  | Fast Light-Induced |
| 393884    | sdha              | 5.3      | 1.60E-08  | Fast Light-Induced |
| 447914    | cox17             | 5.2      | 1.65E-08  | Fast Light-Induced |
| 798993    | abca4a            | 5.8      | 1.67E-08  | Fast Light-Induced |
| 557634    | LOC557634         | 3.7      | 1.68E-08  | Fast Light-Induced |
| 393253    | neil1             | 7.8      | 2.16E-08  | Fast Light-Induced |
| 446130    | si:ch211-237l4.6  | 6.2      | 2.43E-08  | Fast Light-Induced |
| 572207    | zgc:73075         | 4.8      | 2.95E-08  | Fast Light-Induced |
| 58215     | fech              | 6.8      | 2.99E-08  | Fast Light-Induced |
| 450030    | zgc:101803        | 6.2      | 4.20E-08  | Fast Light-Induced |
| 791143    | zgc:158419        | 5.8      | 4.34E-08  | Fast Light-Induced |
| 641489    | zgc:123305        | 7.3      | 5.26E-08  | Fast Light-Induced |
| 767661    | zgc:153046        | 5.5      | 5.71E-08  | Fast Light-Induced |
| 415184    | msrb3             | 7.2      | 5.81E-08  | Fast Light-Induced |
| 553695    | zgc:112255        | 5.2      | 5.86E-08  | Fast Light-Induced |
| 494078    | zgc:101800        | 7.8      | 6.02E-08  | Fast Light-Induced |
| 394039    | zgc:66475         | 6.7      | 6.60E-08  | Fast Light-Induced |

**Table S4: Genes affected by light entrainment.**

| Gene ID   | Symbol           | LD Phase | P value * | Light-Entrainment  |
|-----------|------------------|----------|-----------|--------------------|
| 795535    | LOC795535        | 6.7      | 6.67E-08  | Fast Light-Induced |
| 556575    | LOC556575        | 5.3      | 8.09E-08  | Fast Light-Induced |
| 550575    | rga              | 6.3      | 8.87E-08  | Fast Light-Induced |
| 558071    | atf6             | 2.8      | 9.61E-08  | Fast Light-Induced |
| 406605    | zgc:85644        | 7.5      | 9.86E-08  | Fast Light-Induced |
| 568750    | si:ch211-154o6.7 | 6.5      | 1.06E-07  | Fast Light-Induced |
| 791628    | zgc:103539       | 6.7      | 1.47E-07  | Fast Light-Induced |
| 100003670 | sepx1b           | 7.7      | 1.50E-07  | Fast Light-Induced |
| 436678    | arr3a            | 4.7      | 1.58E-07  | Fast Light-Induced |
| 393762    | zgc:73324        | 7.2      | 1.64E-07  | Fast Light-Induced |
| 445492    | flad1            | 5.2      | 1.98E-07  | Fast Light-Induced |
| 556875    | tmem177          | 5.8      | 1.98E-07  | Fast Light-Induced |
| 323679    | srpk1a           | 6        | 2.05E-07  | Fast Light-Induced |
| 562149    | sdhb             | 6.3      | 2.08E-07  | Fast Light-Induced |
| 445192    | zgc:101042       | 3        | 2.51E-07  | Fast Light-Induced |
| 140633    | per2             | 6.3      | 2.73E-07  | Fast Light-Induced |
| 541408    | zgc:101788       | 4.3      | 3.30E-07  | Fast Light-Induced |
| 568835    | slc27a6          | 7.3      | 3.60E-07  | Fast Light-Induced |
| 799177    | LOC799177        | 6.3      | 3.68E-07  | Fast Light-Induced |
| 565126    | zgc:153043       | 6.7      | 3.91E-07  | Fast Light-Induced |
| 550436    | camk2a           | 4.3      | 3.93E-07  | Fast Light-Induced |
| 352916    | sepx1a           | 8        | 3.94E-07  | Fast Light-Induced |
| 550573    | c1qtnf1          | 6.7      | 4.00E-07  | Fast Light-Induced |
| 550345    | syt13            | 6.7      | 4.09E-07  | Fast Light-Induced |
| 767788    | zgc:153206       | 6.2      | 5.24E-07  | Fast Light-Induced |
| 791167    | zgc:158222       | 3.5      | 5.91E-07  | Fast Light-Induced |
| 436771    | hccsa            | 4.5      | 6.19E-07  | Fast Light-Induced |
| 394160    | bokb             | 4.7      | 7.12E-07  | Fast Light-Induced |
| 541386    | xpc              | 5.7      | 7.69E-07  | Fast Light-Induced |
| 556393    | zgc:153679       | 5.5      | 7.89E-07  | Fast Light-Induced |
| 447802    | zgc:92445        | 3.2      | 9.16E-07  | Fast Light-Induced |
| 373085    | hspa9            | 2.7      | 9.19E-07  | Fast Light-Induced |
| 504039    | im:7150988       | 5.2      | 9.21E-07  | Fast Light-Induced |
| 407654    | mobkl1ab         | 4.7      | 1.02E-06  | Fast Light-Induced |
| 436959    | blvrb            | 6.7      | 1.26E-06  | Fast Light-Induced |
| 798022    | nt5c1ba          | 5.2      | 1.27E-06  | Fast Light-Induced |
| 30452     | etv5b            | 6.5      | 1.49E-06  | Fast Light-Induced |
| 84039     | bcmo1            | 4.7      | 1.63E-06  | Fast Light-Induced |
| 559429    | si:dkey-246j7.1  | 5.3      | 1.65E-06  | Fast Light-Induced |
| 494065    | dhodh            | 7        | 1.70E-06  | Fast Light-Induced |
| 566659    | LOC566659        | 6        | 1.88E-06  | Fast Light-Induced |

**Table S4: Genes affected by light entrainment.**

| Gene ID   | Symbol           | LD Phase | P value * | Light-Entrainment  |
|-----------|------------------|----------|-----------|--------------------|
| 553766    | zgc:109977       | 4.8      | 2.41E-06  | Fast Light-Induced |
| 334202    | plk3             | 6.3      | 2.42E-06  | Fast Light-Induced |
| 387304    | cwf19l1          | 7.2      | 2.48E-06  | Fast Light-Induced |
| 799964    | ptgesl           | 4.7      | 2.52E-06  | Fast Light-Induced |
| 550546    | necab1           | 3        | 2.58E-06  | Fast Light-Induced |
| 564023    | si:ch211-210c8.6 | 5.7      | 2.62E-06  | Fast Light-Induced |
| 570063    | wdr76            | 5.7      | 2.67E-06  | Fast Light-Induced |
| 100005158 | cox11            | 4        | 2.72E-06  | Fast Light-Induced |
| 436704    | rgs20            | 2.2      | 2.80E-06  | Fast Light-Induced |
| 556360    | stim1a           | 5.3      | 3.00E-06  | Fast Light-Induced |
| 436894    | zgc:92254        | 7.5      | 3.17E-06  | Fast Light-Induced |
| 553553    | cfdl             | 7        | 3.30E-06  | Fast Light-Induced |
| 405817    | zgc:73371        | 4.2      | 3.51E-06  | Fast Light-Induced |
| 393426    | ptpn11b          | 3.7      | 3.96E-06  | Fast Light-Induced |
| 402831    | cyp27a7          | 6.8      | 4.04E-06  | Fast Light-Induced |
| 393146    | slmapb           | 4.2      | 4.19E-06  | Fast Light-Induced |
| 568061    | napepld          | 7.8      | 4.35E-06  | Fast Light-Induced |
| 100004133 | ddb2             | 5.2      | 4.38E-06  | Fast Light-Induced |
| 393167    | zgc:56136        | 6        | 4.40E-06  | Fast Light-Induced |
| 406662    | sc4mol           | 6.5      | 4.51E-06  | Fast Light-Induced |
| 100334439 | LOC100334439     | 3.5      | 4.76E-06  | Fast Light-Induced |
| 678653    | unc119b          | 3        | 4.80E-06  | Fast Light-Induced |
| 394043    | ephx1            | 6.8      | 5.21E-06  | Fast Light-Induced |
| 767700    | zgc:153032       | 6.2      | 5.40E-06  | Fast Light-Induced |
| 556789    | stxbp5a          | 3.7      | 5.40E-06  | Fast Light-Induced |
| 373099    | guca1c           | 3.7      | 5.98E-06  | Fast Light-Induced |
| 30735     | irbp             | 5.8      | 6.68E-06  | Fast Light-Induced |
| 494490    | slc6a9           | 2.5      | 6.83E-06  | Fast Light-Induced |
| 777612    | zgc:153914       | 3.7      | 6.91E-06  | Fast Light-Induced |
| 565437    | si:dkey-221j11.2 | 4.7      | 7.29E-06  | Fast Light-Induced |
| 561272    | ppcs             | 3.8      | 7.30E-06  | Fast Light-Induced |
| 564951    | rora             | 3.7      | 7.34E-06  | Fast Light-Induced |
| 100000576 | LOC100000576     | 3.2      | 7.49E-06  | Fast Light-Induced |
| 767657    | abhd12           | 4.7      | 7.49E-06  | Fast Light-Induced |
| 724007    | stra6            | 3.7      | 8.17E-06  | Fast Light-Induced |
| 58134     | adarb1           | 3.7      | 8.23E-06  | Fast Light-Induced |
| 556528    | rdh5             | 5.2      | 8.31E-06  | Fast Light-Induced |
| 796867    | arr3b            | 3.3      | 8.46E-06  | Fast Light-Induced |
| 554962    | LOC554962        | 3.2      | 8.50E-06  | Fast Light-Induced |
| 562019    | wu:fc07b10       | 3.5      | 8.79E-06  | Fast Light-Induced |
| 387527    | cyp4t8           | 7        | 9.18E-06  | Fast Light-Induced |

**Table S4: Genes affected by light entrainment.**

| Gene ID   | Symbol            | LD Phase | P value * | Light-Entrainment  |
|-----------|-------------------|----------|-----------|--------------------|
| 437016    | tk2               | 4.7      | 9.37E-06  | Fast Light-Induced |
| 407988    | zgc:85746         | 4.5      | 9.60E-06  | Fast Light-Induced |
| 323326    | zgc:73225         | 6.8      | 9.69E-06  | Fast Light-Induced |
| 83776     | cry5              | 5        | 9.95E-06  | Fast Light-Induced |
| 724016    | npas4             | 7.2      | 1.01E-05  | Fast Light-Induced |
| 550477    | zgc:112432        | 5.7      | 1.03E-05  | Fast Light-Induced |
| 563405    | gprc5c            | 2.7      | 1.04E-05  | Fast Light-Induced |
| 393322    | tnfaip8l3         | 3.8      | 1.05E-05  | Fast Light-Induced |
| 445114    | cdk5r2b           | 3.2      | 1.07E-05  | Fast Light-Induced |
| 767704    | zgc:153118        | 5.3      | 1.14E-05  | Fast Light-Induced |
| 572463    | ibtk              | 5        | 1.25E-05  | Fast Light-Induced |
| 565155    | hsp90a.2          | 4.3      | 1.27E-05  | Fast Light-Induced |
| 100037332 | zgc:162608        | 5.2      | 1.31E-05  | Fast Light-Induced |
| 100101646 | zgc:165423        | 3.7      | 1.42E-05  | Fast Light-Induced |
| 100073345 | zgc:165670        | 2.7      | 1.42E-05  | Fast Light-Induced |
| 569518    | LOC569518         | 3.5      | 1.47E-05  | Fast Light-Induced |
| 799937    | dio1              | 5.3      | 1.49E-05  | Fast Light-Induced |
| 100125912 | prkg2             | 5.5      | 1.49E-05  | Fast Light-Induced |
| 100005148 | ar                | 5        | 1.54E-05  | Fast Light-Induced |
| 100004913 | phyhiplb          | 3.5      | 1.54E-05  | Fast Light-Induced |
| 449656    | osbpl7            | 3.2      | 1.56E-05  | Fast Light-Induced |
| 791176    | camk1d            | 3.2      | 1.62E-05  | Fast Light-Induced |
| 445044    | rs1               | 2.2      | 1.76E-05  | Fast Light-Induced |
| 324822    | actr6             | 3.5      | 1.79E-05  | Fast Light-Induced |
| 563956    | si:busm1-265n4.4  | 5.8      | 1.90E-05  | Fast Light-Induced |
| 368857    | si:busm1-241h12.4 | 2.3      | 1.92E-05  | Fast Light-Induced |
| 777708    | zgc:153892        | 6        | 2.06E-05  | Fast Light-Induced |
| 378855    | slmo2             | 2.8      | 2.07E-05  | Fast Light-Induced |
| 393580    | zgc:63614         | 6.2      | 2.07E-05  | Fast Light-Induced |
| 64265     | aox3              | 6.5      | 2.27E-05  | Fast Light-Induced |
| 327556    | zgc:63480         | 2.8      | 2.30E-05  | Fast Light-Induced |
| 373084    | hig1              | 2.7      | 2.53E-05  | Fast Light-Induced |
| 563180    | si:ch211-215l11.5 | 4.2      | 2.57E-05  | Fast Light-Induced |
| 100003999 | LOC100003999      | 2.2      | 2.66E-05  | Fast Light-Induced |
| 567667    | slc12a7b          | 4.2      | 2.77E-05  | Fast Light-Induced |
| 557799    | tmem181           | 2.3      | 2.91E-05  | Fast Light-Induced |
| 767653    | zgc:153394        | 3.5      | 3.02E-05  | Fast Light-Induced |
| 368775    | ivd               | 7.7      | 3.09E-05  | Fast Light-Induced |
| 568927    | reep2             | 2.8      | 3.68E-05  | Fast Light-Induced |
| 550521    | phyh              | 8        | 3.76E-05  | Fast Light-Induced |
| 140744    | ckbb              | 3.3      | 3.82E-05  | Fast Light-Induced |

**Table S4: Genes affected by light entrainment.**

| Gene ID   | Symbol           | LD Phase | P value * | Light-Entrainment  |
|-----------|------------------|----------|-----------|--------------------|
| 436969    | zgc:92630        | 5.8      | 4.13E-05  | Fast Light-Induced |
| 394242    | dnaja3b          | 2.7      | 4.14E-05  | Fast Light-Induced |
| 58137     | celf1            | 4        | 4.14E-05  | Fast Light-Induced |
| 567157    | acsl3a           | 3        | 4.24E-05  | Fast Light-Induced |
| 557975    | LOC557975        | 3.5      | 4.35E-05  | Fast Light-Induced |
| 566032    | si:ch211-269e2.2 | 6        | 4.61E-05  | Fast Light-Induced |
| 664766    | zgc:123105       | 3.2      | 4.76E-05  | Fast Light-Induced |
| 100137113 | zgc:171474       | 4.8      | 4.92E-05  | Fast Light-Induced |
| 387592    | slc13a1          | 4.7      | 4.96E-05  | Fast Light-Induced |
| 553244    | tom1             | 5        | 5.20E-05  | Fast Light-Induced |
| 569072    | si:dkey-119o24.1 | 5.3      | 5.21E-05  | Fast Light-Induced |
| 792544    | si:dkey-67c22.2  | 3        | 5.46E-05  | Fast Light-Induced |
| 432385    | zgc:111821       | 7.8      | 5.49E-05  | Fast Light-Induced |
| 393096    | lipg             | 3.8      | 5.57E-05  | Fast Light-Induced |
| 402986    | cry-dash         | 4.3      | 5.88E-05  | Fast Light-Induced |
| 558648    | selo             | 5.7      | 5.93E-05  | Fast Light-Induced |
| 445177    | dnajb1a          | 3.5      | 6.46E-05  | Fast Light-Induced |
| 447937    | zgc:101851       | 7.7      | 6.78E-05  | Fast Light-Induced |
| 619268    | sagb             | 6        | 7.20E-05  | Fast Light-Induced |
| 326964    | mg:cb01g09       | 3.2      | 7.29E-05  | Fast Light-Induced |
| 431765    | zgc:77060        | 5.8      | 8.07E-05  | Fast Light-Induced |
| 406308    | grb2             | 3        | 8.16E-05  | Fast Light-Induced |
| 567414    | agpat9l          | 4.7      | 8.28E-05  | Fast Light-Induced |
| 569958    | LOC569958        | 6.8      | 8.44E-05  | Fast Light-Induced |
| 560210    | hsp70l           | 5.3      | 8.70E-05  | Fast Light-Induced |
| 568862    | si:ch73-266o15.4 | 5.2      | 8.81E-05  | Fast Light-Induced |
| 567762    | mycl1b           | 4.3      | 8.87E-05  | Fast Light-Induced |
| 393444    | pygmb            | 3.2      | 9.05E-05  | Fast Light-Induced |
| 566120    | grk7a            | 2.2      | 9.10E-05  | Fast Light-Induced |
| 402833    | camsap1a         | 2.8      | 9.17E-05  | Fast Light-Induced |
| 30674     | tef              | 3.5      | 9.51E-05  | Fast Light-Induced |
| 334203    | zgc:114043       | 4.7      | 9.56E-05  | Fast Light-Induced |
| 406623    | decr2            | 4.8      | 9.96E-05  | Fast Light-Induced |
| 100332249 | LOC100332249     | 11.7     | 5.01E-13  | Slow Light-Induced |
| 678554    | bco2a            | 8.5      | 5.37E-11  | Slow Light-Induced |
| 406433    | dhdhl            | 11.3     | 1.11E-10  | Slow Light-Induced |
| 553611    | six6b            | 8.5      | 4.85E-10  | Slow Light-Induced |
| 559626    | crtac1a          | 9.5      | 1.91E-09  | Slow Light-Induced |
| 83780     | cry2b            | 12.7     | 2.17E-09  | Slow Light-Induced |
| 494085    | pink1            | 14       | 2.72E-09  | Slow Light-Induced |
| 554067    | pcdh2g20         | 14.7     | 3.01E-09  | Slow Light-Induced |

**Table S4: Genes affected by light entrainment.**

| Gene ID   | Symbol            | LD Phase | P value * | Light-Entrainment  |
|-----------|-------------------|----------|-----------|--------------------|
| 573209    | cry2a             | 12.3     | 8.55E-09  | Slow Light-Induced |
| 447842    | zgc:92303         | 12.8     | 8.79E-09  | Slow Light-Induced |
| 58118     | bdnf              | 10.2     | 9.38E-09  | Slow Light-Induced |
| 751751    | zgc:153383        | 12.5     | 1.42E-08  | Slow Light-Induced |
| 337574    | nfatc2ip          | 10.3     | 1.82E-08  | Slow Light-Induced |
| 100333879 | LOC100333879      | 12.5     | 1.83E-08  | Slow Light-Induced |
| 406625    | lgmn              | 15.5     | 2.93E-08  | Slow Light-Induced |
| 445278    | cldn8             | 9.8      | 3.28E-08  | Slow Light-Induced |
| 407688    | sft2d3            | 13.7     | 3.89E-08  | Slow Light-Induced |
| 324373    | zgc:77513         | 8.7      | 4.49E-08  | Slow Light-Induced |
| 797680    | si:dkey-273o13.1  | 15.7     | 5.70E-08  | Slow Light-Induced |
| 393767    | zgc:73336         | 10.8     | 7.03E-08  | Slow Light-Induced |
| 393283    | chd1l             | 8.8      | 9.03E-08  | Slow Light-Induced |
| 566557    | furina            | 11.5     | 9.94E-08  | Slow Light-Induced |
| 282554    | drd3              | 12.2     | 1.20E-07  | Slow Light-Induced |
| 30517     | ahr2              | 14.2     | 1.30E-07  | Slow Light-Induced |
| 352915    | sepw1             | 9.2      | 1.72E-07  | Slow Light-Induced |
| 404207    | cx52.6            | 9        | 1.83E-07  | Slow Light-Induced |
| 245946    | invs              | 8.8      | 1.99E-07  | Slow Light-Induced |
| 352935    | arntl1b           | 12.2     | 2.01E-07  | Slow Light-Induced |
| 564746    | glsb              | 10.5     | 2.28E-07  | Slow Light-Induced |
| 550490    | zgc:110339        | 8.3      | 2.84E-07  | Slow Light-Induced |
| 791179    | si:dkey-19f23.3   | 10.5     | 3.43E-07  | Slow Light-Induced |
| 352916    | sepx1a            | 9.8      | 3.52E-07  | Slow Light-Induced |
| 259250    | trh1              | 14.7     | 3.66E-07  | Slow Light-Induced |
| 560362    | dis3l             | 12       | 4.14E-07  | Slow Light-Induced |
| 335656    | gngt1             | 12.2     | 4.56E-07  | Slow Light-Induced |
| 550515    | crif3             | 11.3     | 5.19E-07  | Slow Light-Induced |
| 799219    | si:ch211-240l19.7 | 13.7     | 5.56E-07  | Slow Light-Induced |
| 445091    | zgc:92480         | 8.5      | 5.85E-07  | Slow Light-Induced |
| 541550    | ablim1b           | 8.8      | 6.05E-07  | Slow Light-Induced |
| 368367    | si:ch211-284e13.2 | 14.5     | 6.39E-07  | Slow Light-Induced |
| 30077     | rbp4              | 8.3      | 6.86E-07  | Slow Light-Induced |
| 322152    | wu:fb51f10        | 12.2     | 8.13E-07  | Slow Light-Induced |
| 60635     | cldn7b            | 10.2     | 8.37E-07  | Slow Light-Induced |
| 555304    | clasp             | 12.2     | 8.84E-07  | Slow Light-Induced |
| 449665    | gpsm2l            | 15.3     | 8.93E-07  | Slow Light-Induced |
| 570286    | fr02              | 12.3     | 9.07E-07  | Slow Light-Induced |
| 100002010 | abcc1             | 10       | 9.21E-07  | Slow Light-Induced |
| 562478    | zufsp             | 8.8      | 9.69E-07  | Slow Light-Induced |
| 557451    | daam1a            | 13.5     | 1.01E-06  | Slow Light-Induced |

**Table S4: Genes affected by light entrainment.**

| Gene ID   | Symbol            | LD Phase | P value * | Light-Entrainment  |
|-----------|-------------------|----------|-----------|--------------------|
| 492473    | zgc:103488        | 14.7     | 1.05E-06  | Slow Light-Induced |
| 393481    | cyp2k6            | 11.3     | 1.20E-06  | Slow Light-Induced |
| 553745    | zgc:113184        | 9.2      | 1.25E-06  | Slow Light-Induced |
| 565658    | sema3e            | 13       | 1.40E-06  | Slow Light-Induced |
| 570622    | gbp2              | 14.2     | 1.47E-06  | Slow Light-Induced |
| 566858    | mov10a            | 9.7      | 1.49E-06  | Slow Light-Induced |
| 797834    | si:dkeyp-110c7.1  | 14       | 1.51E-06  | Slow Light-Induced |
| 100332121 | LOC100332121      | 13.5     | 1.67E-06  | Slow Light-Induced |
| 393541    | tsc22d3           | 8.8      | 1.71E-06  | Slow Light-Induced |
| 406648    | ppt1              | 14       | 1.88E-06  | Slow Light-Induced |
| 561635    | mylk3             | 12.2     | 2.07E-06  | Slow Light-Induced |
| 569007    | LOC569007         | 8.5      | 2.13E-06  | Slow Light-Induced |
| 394056    | zgc:56010         | 14.5     | 2.41E-06  | Slow Light-Induced |
| 571066    | LOC571066         | 9.7      | 2.57E-06  | Slow Light-Induced |
| 325724    | etfa              | 8.3      | 2.60E-06  | Slow Light-Induced |
| 402892    | orai1             | 15.8     | 3.05E-06  | Slow Light-Induced |
| 445120    | cutl1             | 11.3     | 3.26E-06  | Slow Light-Induced |
| 497449    | ghdcl             | 11.2     | 3.50E-06  | Slow Light-Induced |
| 100137128 | hbl4              | 11.2     | 3.63E-06  | Slow Light-Induced |
| 557454    | wu:fk57d06        | 10       | 3.91E-06  | Slow Light-Induced |
| 324148    | wu:fc20c04        | 15.5     | 3.95E-06  | Slow Light-Induced |
| 559850    | neu1              | 14.5     | 4.09E-06  | Slow Light-Induced |
| 492783    | dhrs13            | 9.8      | 4.41E-06  | Slow Light-Induced |
| 494087    | zgc:101722        | 11.2     | 4.55E-06  | Slow Light-Induced |
| 324501    | tmem165           | 15.2     | 4.62E-06  | Slow Light-Induced |
| 58099     | arntl2            | 14.7     | 5.17E-06  | Slow Light-Induced |
| 405849    | foxd11            | 12.7     | 5.39E-06  | Slow Light-Induced |
| 406579    | dnajc7            | 15.7     | 5.49E-06  | Slow Light-Induced |
| 327592    | micall2b          | 15.5     | 5.74E-06  | Slow Light-Induced |
| 100331902 | zgc:110784        | 11.8     | 5.77E-06  | Slow Light-Induced |
| 327360    | memo1             | 10       | 5.80E-06  | Slow Light-Induced |
| 767759    | zgc:153704        | 9.7      | 6.60E-06  | Slow Light-Induced |
| 492812    | nap1l4b           | 14       | 8.01E-06  | Slow Light-Induced |
| 550409    | ms4a17a.7         | 12.7     | 8.02E-06  | Slow Light-Induced |
| 449859    | si:ch211-251j10.4 | 13.8     | 8.13E-06  | Slow Light-Induced |
| 553634    | casp7             | 11.8     | 8.27E-06  | Slow Light-Induced |
| 797384    | btr29             | 14.5     | 8.55E-06  | Slow Light-Induced |
| 565154    | rspry1            | 11       | 8.55E-06  | Slow Light-Induced |
| 559258    | LOC559258         | 11.3     | 8.60E-06  | Slow Light-Induced |
| 569467    | si:dkeyp-33i11.9  | 9.3      | 8.77E-06  | Slow Light-Induced |
| 492507    | crh               | 9.3      | 9.94E-06  | Slow Light-Induced |

**Table S4: Genes affected by light entrainment.**

| Gene ID   | Symbol           | LD Phase | P value * | Light-Entrainment  |
|-----------|------------------|----------|-----------|--------------------|
| 393249    | zgc:56525        | 12.8     | 1.03E-05  | Slow Light-Induced |
| 394183    | grina            | 14.2     | 1.03E-05  | Slow Light-Induced |
| 791738    | zgc:103591       | 15.3     | 1.21E-05  | Slow Light-Induced |
| 564249    | lyve1            | 10.2     | 1.25E-05  | Slow Light-Induced |
| 735291    | hspa12b          | 11.7     | 1.26E-05  | Slow Light-Induced |
| 571356    | si:dkey-24l11.7  | 13.8     | 1.27E-05  | Slow Light-Induced |
| 797303    | tada2a           | 12.8     | 1.36E-05  | Slow Light-Induced |
| 567578    | dcaf11           | 13.2     | 1.38E-05  | Slow Light-Induced |
| 768291    | ppm1h            | 15.7     | 1.57E-05  | Slow Light-Induced |
| 324109    | sp1              | 12.8     | 1.65E-05  | Slow Light-Induced |
| 402869    | mbip             | 8.2      | 1.70E-05  | Slow Light-Induced |
| 394012    | zgc:63474        | 15.8     | 1.74E-05  | Slow Light-Induced |
| 402935    | chm              | 14.7     | 1.78E-05  | Slow Light-Induced |
| 445495    | tmem144a         | 13.5     | 1.79E-05  | Slow Light-Induced |
| 798401    | tex2             | 13.7     | 1.85E-05  | Slow Light-Induced |
| 550341    | dnajc28          | 9.8      | 1.93E-05  | Slow Light-Induced |
| 324412    | fam164a          | 13       | 2.15E-05  | Slow Light-Induced |
| 100004079 | LOC100004079     | 11.5     | 2.19E-05  | Slow Light-Induced |
| 570476    | si:dkeyp-84f11.5 | 14.2     | 2.49E-05  | Slow Light-Induced |
| 387531    | cpvl             | 11.7     | 2.64E-05  | Slow Light-Induced |
| 553351    | clcn7            | 15       | 2.65E-05  | Slow Light-Induced |
| 436881    | rgp1             | 14.7     | 2.75E-05  | Slow Light-Induced |
| 282677    | bckdk            | 13.8     | 2.83E-05  | Slow Light-Induced |
| 541415    | zgc:101577       | 9.3      | 2.83E-05  | Slow Light-Induced |
| 777614    | zgc:152898       | 12.2     | 2.91E-05  | Slow Light-Induced |
| 386967    | stam             | 14.8     | 3.05E-05  | Slow Light-Induced |
| 553781    | zmynd11          | 13.5     | 3.11E-05  | Slow Light-Induced |
| 724003    | zgc:136474       | 8.2      | 3.20E-05  | Slow Light-Induced |
| 556409    | g3bp2            | 13.5     | 3.22E-05  | Slow Light-Induced |
| 324140    | sgk1             | 8.7      | 3.37E-05  | Slow Light-Induced |
| 504151    | im:7155152       | 15.3     | 3.48E-05  | Slow Light-Induced |
| 337153    | zgc:77151        | 13       | 3.51E-05  | Slow Light-Induced |
| 494533    | prkar1aa         | 14.5     | 3.56E-05  | Slow Light-Induced |
| 30221     | psen1            | 15.5     | 3.71E-05  | Slow Light-Induced |
| 561802    | wu:fc76b11       | 12.7     | 3.76E-05  | Slow Light-Induced |
| 566632    | med12            | 13.8     | 3.86E-05  | Slow Light-Induced |
| 100002272 | dusp22b          | 16       | 3.94E-05  | Slow Light-Induced |
| 352927    | clock3           | 15       | 3.95E-05  | Slow Light-Induced |
| 566811    | zgc:152984       | 11.5     | 3.97E-05  | Slow Light-Induced |
| 568256    | zgc:162232       | 10.5     | 4.10E-05  | Slow Light-Induced |
| 794083    | LOC794083        | 8.8      | 4.15E-05  | Slow Light-Induced |



**Table S4: Genes affected by light entrainment.**

| Gene ID   | Symbol           | LD Phase | P value * | Light-Entrainment  |
|-----------|------------------|----------|-----------|--------------------|
| 352928    | gpx4a            | 11.7     | 4.62E-05  | Slow Light-Induced |
| 325042    | tnika            | 14.2     | 4.82E-05  | Slow Light-Induced |
| 327277    | sec22bb          | 14.8     | 4.84E-05  | Slow Light-Induced |
| 393164    | zgc:56112        | 14       | 4.87E-05  | Slow Light-Induced |
| 100007897 | zgc:162290       | 14.5     | 5.64E-05  | Slow Light-Induced |
| 100037363 | zgc:162228       | 12.8     | 5.73E-05  | Slow Light-Induced |
| 402949    | slc30a6          | 15.2     | 5.75E-05  | Slow Light-Induced |
| 406578    | stxbp2           | 11.3     | 5.85E-05  | Slow Light-Induced |
| 368775    | ivd              | 8.7      | 5.92E-05  | Slow Light-Induced |
| 492523    | def8             | 14.7     | 6.03E-05  | Slow Light-Induced |
| 436640    | zgc:92090        | 11.5     | 6.09E-05  | Slow Light-Induced |
| 777759    | si:dkey-228a15.3 | 9.3      | 6.28E-05  | Slow Light-Induced |
| 436886    | nrbf2            | 13.7     | 6.49E-05  | Slow Light-Induced |
| 368704    | ctsc             | 15.3     | 6.49E-05  | Slow Light-Induced |
| 100002945 | zgc:110779       | 14.2     | 6.60E-05  | Slow Light-Induced |
| 393287    | chuk             | 14       | 6.74E-05  | Slow Light-Induced |
| 378456    | cmt4b2           | 13       | 6.87E-05  | Slow Light-Induced |
| 406645    | ctsba            | 15.5     | 7.10E-05  | Slow Light-Induced |
| 664760    | tbce             | 15.5     | 7.32E-05  | Slow Light-Induced |
| 436626    | dnajb6a          | 13.2     | 7.45E-05  | Slow Light-Induced |
| 565588    | ctsf             | 14.3     | 7.57E-05  | Slow Light-Induced |
| 562682    | si:dkey-251i10.2 | 9.2      | 7.58E-05  | Slow Light-Induced |
| 557337    | prkd3            | 8.7      | 7.76E-05  | Slow Light-Induced |
| 557682    | zgc:154015       | 15.7     | 7.88E-05  | Slow Light-Induced |
| 573382    | mns1             | 13.2     | 8.07E-05  | Slow Light-Induced |
| 335650    | rcv1             | 9.2      | 8.13E-05  | Slow Light-Induced |
| 394052    | ftcd             | 10.8     | 8.44E-05  | Slow Light-Induced |
| 378969    | rab32a           | 12.5     | 8.49E-05  | Slow Light-Induced |
| 553363    | fto              | 15       | 8.75E-05  | Slow Light-Induced |
| 558558    | zgc:153606       | 14.7     | 8.77E-05  | Slow Light-Induced |
| 100000104 | zgc:162946       | 13.8     | 8.87E-05  | Slow Light-Induced |
| 723997    | mgst2            | 14.8     | 9.12E-05  | Slow Light-Induced |
| 405774    | uts2a            | 10.2     | 9.17E-05  | Slow Light-Induced |
| 338306    | impdh1b          | 15       | 9.23E-05  | Slow Light-Induced |
| 394085    | zgc:66323        | 9        | 9.35E-05  | Slow Light-Induced |
| 564649    | LOC564649        | 12.3     | 9.41E-05  | Slow Light-Induced |
| 550287    | psmd4b           | 15.7     | 9.53E-05  | Slow Light-Induced |
| 100000303 | zplxdc2          | 14.2     | 9.60E-05  | Slow Light-Induced |
| 100037388 | zgc:162420       | 14       | 9.65E-05  | Slow Light-Induced |
| 336426    | chmp1b           | 15.8     | 9.69E-05  | Slow Light-Induced |
| 436961    | cdc34b           | 12.8     | 9.81E-05  | Slow Light-Induced |

**Table S4: Genes affected by light entrainment.**

| Gene ID   | Symbol            | LD Phase | P value * | Light-Entrainment |
|-----------|-------------------|----------|-----------|-------------------|
| 140423    | jag1b             | 18       | 5.60E-09  | Dark-Lnduced      |
| 799423    | si:ch211-191i18.3 | 1.3      | 2.01E-07  | Dark-Lnduced      |
| 446119    | srp68             | 23.3     | 2.16E-07  | Dark-Lnduced      |
| 568985    | slc6a1            | 21.3     | 6.15E-07  | Dark-Lnduced      |
| 100003274 | rab38             | 22.7     | 7.36E-07  | Dark-Lnduced      |
| 266599    | id2a              | 16.7     | 8.08E-07  | Dark-Lnduced      |
| 561606    | atoh8             | 17.8     | 1.47E-06  | Dark-Lnduced      |
| 431721    | mrrf              | 1.3      | 1.50E-06  | Dark-Lnduced      |
| 503564    | drd4a             | 18       | 1.78E-06  | Dark-Lnduced      |
| 791773    | gpr39             | 20.7     | 2.63E-06  | Dark-Lnduced      |
| 678556    | cldn15b           | 17       | 2.80E-06  | Dark-Lnduced      |
| 553574    | pin4              | 1.7      | 2.81E-06  | Dark-Lnduced      |
| 326033    | zgc:56622         | 20.5     | 3.26E-06  | Dark-Lnduced      |
| 570312    | slc24a5           | 23.2     | 3.26E-06  | Dark-Lnduced      |
| 768157    | cplx4a            | 22.5     | 3.59E-06  | Dark-Lnduced      |
| 100331574 | LOC100331574      | 22.2     | 5.97E-06  | Dark-Lnduced      |
| 100149301 | LOC100149301      | 21.2     | 6.70E-06  | Dark-Lnduced      |
| 568102    | LOC568102         | 1.3      | 7.45E-06  | Dark-Lnduced      |
| 393761    | rdh8l             | 21.8     | 7.84E-06  | Dark-Lnduced      |
| 336034    | wu:fj44c04        | 0.7      | 8.56E-06  | Dark-Lnduced      |
| 557648    | mapkapk2b         | 21.8     | 9.87E-06  | Dark-Lnduced      |
| 406599    | atp5j             | 1.2      | 9.95E-06  | Dark-Lnduced      |
| 368722    | pdzk1ip1l         | 18       | 1.21E-05  | Dark-Lnduced      |
| 569894    | LOC569894         | 0.3      | 1.63E-05  | Dark-Lnduced      |
| 100002108 | npvf              | 1.7      | 1.68E-05  | Dark-Lnduced      |
| 559618    | LOC559618         | 23.7     | 1.76E-05  | Dark-Lnduced      |
| 393815    | zgc:65890         | 20.5     | 1.99E-05  | Dark-Lnduced      |
| 259258    | p2rx4a            | 18.2     | 2.33E-05  | Dark-Lnduced      |
| 100322009 | si:ch1073-66c17.4 | 1.3      | 2.39E-05  | Dark-Lnduced      |
| 368863    | fkbp3             | 18.8     | 2.42E-05  | Dark-Lnduced      |
| 436850    | suclg1            | 1.7      | 2.47E-05  | Dark-Lnduced      |
| 327079    | sap30l            | 18.7     | 2.52E-05  | Dark-Lnduced      |
| 30080     | mitfa             | 20.7     | 2.60E-05  | Dark-Lnduced      |
| 245703    | atp1a1a.5         | 17.8     | 2.86E-05  | Dark-Lnduced      |
| 571626    | zgc:158742        | 16.3     | 2.92E-05  | Dark-Lnduced      |
| 334465    | si:dkey-18f23.10  | 19       | 3.23E-05  | Dark-Lnduced      |
| 322462    | sult6b1           | 0.8      | 3.54E-05  | Dark-Lnduced      |
| 100003734 | fastkd3           | 16.8     | 3.88E-05  | Dark-Lnduced      |
| 100007318 | LOC100007318      | 18.5     | 4.40E-05  | Dark-Lnduced      |
| 798921    | si:ch211-217k17.9 | 1.7      | 5.41E-05  | Dark-Lnduced      |
| 393515    | stx3a             | 16.8     | 5.76E-05  | Dark-Lnduced      |

**Table S4: Genes affected by light entrainment.**

| <b>Gene ID</b> | <b>Symbol</b>   | <b>LD Phase</b> | <b>P value *</b> | <b>Light-Entrainment</b> |
|----------------|-----------------|-----------------|------------------|--------------------------|
| 402976         | si:dkey-194e6.1 | 22.8            | 5.88E-05         | Dark-Lnduced             |
| 58076          | gata6           | 20.5            | 6.02E-05         | Dark-Lnduced             |
| 327379         | calm3a          | 0.2             | 6.57E-05         | Dark-Lnduced             |
| 393677         | aanat1          | 19.3            | 7.09E-05         | Dark-Lnduced             |
| 58048          | hoxa9b          | 16.5            | 7.98E-05         | Dark-Lnduced             |
| 550415         | ap1s3a          | 0.3             | 8.39E-05         | Dark-Lnduced             |
| 436650         | hip1r           | 16.5            | 8.77E-05         | Dark-Lnduced             |
| 405875         | zgc:85932       | 22.3            | 9.52E-05         | Dark-Lnduced             |
| 570276         | vsg1            | 20              | 9.84E-05         | Dark-Lnduced             |

\* We fit the joint LD/DD gene expression values to a set of cosine curves with 24h periods of shifting phases in LD but constant levels at either +1 (elevated troughs) or -1 (decreased peaks) in DD. P value less than 0.0001 was used in the fit of joint LD/DD expression value.
