# Supplementary material for: Analysis of a Gene Regulatory Cascade Mediating Circadian Rhythm in Zebrafish
Source: PubMed Central journal article supplement (PMC3585402; doi:10.1371/journal.pcbi.1002940), 2013-02-28
Supplement: pcbi.1002940.s010.pdf [file pcbi.1002940.s010.pdf]

**Table S5: Primers used for real-time PCR.**

| <b>Gene Symbol</b> | <b>Forward</b>       | <b>Reverse</b>       | <b>Product Size</b> | <b>Ensemble ID</b> |
|--------------------|----------------------|----------------------|---------------------|--------------------|
| aanat1             | GGACCAGGACCGTCTGACT  | CTGCAAGTAACGCCACAAGA | 199bp               | ENSDART00000053126 |
| cry2a              | CGGGCCACAACAGTAGATTT | TCTCTCCCTCTTCCCTGTCA | 158bp               | ENSDART00000129210 |
| per2               | CTCTGGACGGCAGTGAGAAT | CACAGCACCTTCTGGATGTC | 190bp               | ENSDART00000039735 |
| gapdh              | TGCTGGTATTGCTCTCAACG | GCCATCAGGTCACATACACG | 153bp               | ENSDART00000063800 |
| per3               | CTCGTCCTCCACCTCAGAAG | CTGAACCTGCAGACACCTGA | 173bp               | ENSDART00000024304 |
| bhlhe40            | TGCCCGAACACCTTAAACTC | CCAAGACAACAGCCTTCTCC | 117bp               | ENSDART00000026017 |
| bhlhe41            | TGACGCTGAAGCATTGTAAC | GCGTCTAAGTCAGCCTGGAG | 178bp               | ENSDART00000061106 |
| smad1              | GCTCTTGGCACAGTCAGTCA | ACATCCTGCCGATGGTACTC | 177bp               | ENSDART00000125043 |
| smad3a             | ACCAAACCCTGTGTCTCCTG | GCTGTGAGGCATGGAAAGTT | 194bp               | ENSDART00000045374 |
| ppargc1b           | TGTCCTGTTCACCTCCTTCC | TCCATGACACGTCTCTGAGC | 131bp               | ENSDART00000079080 |
| cdx1b              | GAAAAGCAGAACTGGCAACC | GAGGCTGCTGCATTTTCTTC | 174bp               | ENSDART00000081993 |
| crx                | ACCTTCCCAGTCCAGAGTT  | GCATTTAGCACGACGGTTCT | 113bp               | ENSDART00000037879 |
| myog               | GCCTTGGAGGGCTTAATTTT | GAATCAGCCTTCCTGACTGC | 136bp               | ENSDART00000014062 |
| hnf1a              | ATTGCCCAAGCTCCTTTAT  | TACTGCTGTCTGCGATCACC | 187bp               | ENSDART00000018862 |
| maf                | CAGCAGAGGCACATACTGGA | CGATGAGTTTTCTCGGAAGC | 153bp               | ENSDART00000014703 |
| pax6a              | CTGACGTTTTTGCACGAGAA | AACTTTTCTCCCTCCTCCA  | 169bp               | ENSDART00000148420 |
| mef2a              | GGCTCTCCAGGGCTCTCTAT | CATTCTGGCTGGTGTGATG  | 196bp               | ENSDART00000148106 |
| clock              | AGACCACCAACCTCAACCAG | CTGTGTCGGCTGAGAGATCA | 173bp               | ENSDART00000025575 |
| mitfa              | GCAGCAGAAAGCAAAGAGC  | GGCTGGAAGAAGCTACAACG | 194bp               | ENSDART00000056457 |
