# Supplementary material for: Analysis of a Gene Regulatory Cascade Mediating Circadian Rhythm in Zebrafish
Source: PubMed Central journal article supplement (PMC3585402; doi:10.1371/journal.pcbi.1002940), 2013-02-28
Supplement: pcbi.1002940.s011.pdf [file pcbi.1002940.s011.pdf]

**Table S6: Transcription factors in zebrafish circadian oscillating genes.**

| <b>TF</b> | <b>TRANSFAC MOTIF</b> | <b>Circadian Phase</b> |
|-----------|-----------------------|------------------------|
| AHR1A     | AhR_HIF               | 2.833                  |
| AHR1A     | AhR                   | 2.833                  |
| AR        | AR                    | 5.167                  |
| ARID2     | NA                    | 20.000                 |
| ARID3B    | NA                    | 14.875                 |
| ARNTL1A   | EBOX_CLOCK            | 13.420                 |
| ARNTL1B   | EBOX_CLOCK            | 12.790                 |
| ARNTL2    | EBOX_CLOCK            | 16.290                 |
| ATF4B1    | CRE                   | 15.750                 |
| ATF6      | CRE                   | 2.583                  |
| BHLHE40   | Ebox_DEC              | 5.250                  |
| BHLHE41   | Ebox_DEC              | 0.542                  |
| BLZF1     | NA                    | 15.833                 |
| BMI1      | NA                    | 16.792                 |
| BRD8      | NA                    | 14.583                 |
| CALCOCO1  | NA                    | 15.125                 |
| CBX3B     | NA                    | 6.500                  |
| CBX4      | NA                    | 16.917                 |
| CDX1A     | CDX                   | 15.833                 |
| CDX1B     | CDX                   | 14.330                 |
| CDX4      | NA                    | 20.667                 |
| CEBPA     | C/EBP                 | 22.417                 |
| CHD2      | NA                    | 16.083                 |
| CLOCK     | EBOX_CLOCK            | 15.080                 |
| CLOCK3    | EBOX_CLOCK            | 15.080                 |
| CREB3L3   | CRE                   | 7.000                  |
| CRSP6     | NA                    | 16.417                 |
| CRX       | PRD/Crx               | 16.625                 |
| DCP1A     | NA                    | 14.583                 |
| DLX3B     | NA                    | 19.417                 |
| DRG1      | NA                    | 0.750                  |
| ELL2      | NA                    | 3.042                  |
| EPAS1A    | NA                    | 3.542                  |
| ERCC2     | NA                    | 17.333                 |
| ETV5B     | NA                    | 6.500                  |
| FLI1B     | ETS                   | 14.167                 |
| FOXA1     | HNF3                  | 14.670                 |
| FO XK2    | NA                    | 18.750                 |
| FOXO3B    | FOXO                  | 12.420                 |
| FUBP1     | NA                    | 18.833                 |
| FUS       | NA                    | 15.042                 |
| GATAD2A   | NA                    | 19.000                 |
| GLI1      | NA                    | 14.417                 |
| GTF2A1    | TFIIA                 | 3.920                  |
| GTF3AA    | NA                    | 0.500                  |
| HBP1      | NA                    | 12.500                 |
| HIF1AB    | AhR_HIF               | 23.420                 |
| HIF1AB    | HIF                   | 23.420                 |
| HMGB3B    | NA                    | 3.667                  |
| HMX1      | NA                    | 15.333                 |
| HNF1A     | HNF1                  | 4.417                  |
| HOXA10B   | NA                    | 16.250                 |
| HOXA11B   | NA                    | 19.917                 |
| HOXA2B    | NA                    | 17.500                 |
| HOXA4A    | HOX1/HOXA             | 16.917                 |

**Table S6: Transcription factors in zebrafish circadian oscillating genes.**

| <b>TF</b> | <b>TRANSFAC MOTIF</b> | <b>Circadian Phase</b> |
|-----------|-----------------------|------------------------|
| HOXB1A    | NA                    | 16.500                 |
| HOXB1B    | NA                    | 16.500                 |
| HOXB2A    | NA                    | 16.167                 |
| HOXC11A   | NA                    | 21.708                 |
| HSF2      | HSF                   | 3.750                  |
| HTATIP2   | NA                    | 8.500                  |
| ID2A      | NA                    | 17.292                 |
| ID4       | NA                    | 15.417                 |
| KCNIP3    | NA                    | 3.083                  |
| KLF2B     | NA                    | 13.500                 |
| LBX1A     | NA                    | 14.250                 |
| LMO1      | NA                    | 15.750                 |
| LRRFIP1A  | NA                    | 4.125                  |
| LZTR1     | NA                    | 14.417                 |
| MAF       | MAF                   | 1.500                  |
| MAX       | Ebox_general          | 22.880                 |
| MAX       | Ebox_MycMax           | 22.880                 |
| MBD1      | NA                    | 16.417                 |
| MECOM     | Evi                   | 12.583                 |
| MED12     | NA                    | 15.500                 |
| MEF2A     | MEF2                  | 1.500                  |
| MEF2A     | RSRFC4                | 1.500                  |
| MITFA     | Ebox_TFE              | 21.420                 |
| MSRB2     | NA                    | 14.833                 |
| MXD3      | Ebox_general          | 12.670                 |
| MYCB      | Ebox_general          | 4.000                  |
| MYCL1B    | NA                    | 5.833                  |
| MYOG      | Ebox_E2A_MyoD         | 10.625                 |
| NFE2L1    | MAF                   | 9.500                  |
| NFE2L2    | MAF                   | 7.080                  |
| NFIL3     | DBOX                  | 14.420                 |
| NFYBB     | NFY                   | 16.920                 |
| NR1D1     | RRE                   | 23.750                 |
| NR1D4A    | RRE                   | 19.830                 |
| NR1D4B    | RRE                   | 19.750                 |
| NR3C1     | GRE                   | 13.710                 |
| NR4A1     | NA                    | 2.000                  |
| NRBF2     | NA                    | 14.333                 |
| NRIP1B    | NA                    | 12.417                 |
| PAX6A     | PAX6                  | 15.500                 |
| PAX6A     | PAX                   | 15.500                 |
| PBXIP1A   | NA                    | 1.167                  |
| PER1A     | NA                    | 1.042                  |
| PER1B     | NA                    | 3.333                  |
| PER2      | NA                    | 7.500                  |
| PER3      | NA                    | 4.167                  |
| PIAS2     | NA                    | 15.250                 |
| PIR       | NA                    | 16.417                 |
| POLR2EB   | NA                    | 1.667                  |
| POLR3C    | NA                    | 0.167                  |
| PPARGC1B  | PPAR                  | 22.170                 |
| PRRX1A    | NA                    | 17.417                 |
| PTF1A     | NA                    | 19.583                 |
| RARAA     | DR4                   | 12.167                 |
| RNF2      | NA                    | 15.083                 |

**Table S6: Transcription factors in zebrafish circadian oscillating genes.**

| TF               | TRANSFAC MOTIF | Circadian Phase |
|------------------|----------------|-----------------|
| RORAB            | RRE            | 7.500           |
| RORCA            | NA             | 10.750          |
| RORCB            | NA             | 12.417          |
| SI:CH211-199M3.9 | CRE            | 2.580           |
| SIX2A            | NA             | 17.333          |
| SIX3A            | NA             | 17.417          |
| SLA2             | NA             | 16.917          |
| SMAD1            | SMAD           | 20.333          |
| SMAD3A           | SMAD           | 4.417           |
| SMYD1A           | NA             | 17.208          |
| SNAPC3           | NA             | 0.667           |
| STAT6            | NA             | 12.417          |
| TAF1             | NA             | 16.250          |
| TAF12            | NA             | 15.500          |
| TAF7             | NA             | 17.500          |
| TBPL1            | NA             | 16.000          |
| TBX1             | NA             | 15.750          |
| TCF12            | Ebox_HEB       | 13.750          |
| TCF12            | Ebox_general   | 13.750          |
| TCF12            | Ebox_E2A_MyoD  | 13.750          |
| TCF25            | NA             | 0.083           |
| TCF3             | NA             | 12.917          |
| TEF              | DBOX           | 3.417           |
| TFB2M            | NA             | 19.333          |
| TFCP2L1          | CP2/LSF        | 14.667          |
| TGIF1            | TGIF           | 13.667          |
| TOX              | NA             | 18.000          |
| TSC22D3          | NA             | 8.583           |
| UHRF1            | NA             | 4.250           |
| USF1             | Ebox_USF       | 13.167          |
| VSX1             | NA             | 15.833          |
| XBP1             | XBP1           | 2.917           |
| YY1A             | YY1            | 12.667          |
| YY1B             | NA             | 16.708          |
| ZBTB16A          | NA             | 15.250          |
| ZDHHC3           | NA             | 4.417           |
| ZFP36L2          | NA             | 7.917           |
| ZNRD1            | NA             | 1.250           |

TF: gene symbol of the transcription factor.

MOTIF: position weight matrices corresponding to the transcription factor.

circadian\_phase: circadian phase of the transcription factor.
