# Supplementary material for: Analysis of a Gene Regulatory Cascade Mediating Circadian Rhythm in Zebrafish
Source: PubMed Central journal article supplement (PMC3585402; doi:10.1371/journal.pcbi.1002940), 2013-02-28
Supplement: pcbi.1002940.s012.pdf [file pcbi.1002940.s012.pdf]

**Table S7: Circadian phase of transcription factor and their targets.**

| TF               | TF PK | TRANSFAC MOTIF | Target PK | P value  | Odd Ratio |
|------------------|-------|----------------|-----------|----------|-----------|
| YY1A             | 12.67 | YY1_Q6_Q2      | 22.68     | 7.78E-10 | 3.50      |
| NFIL3            | 14.42 | E4BP4_Q1       | 3.96      | 1.08E-08 | 3.17      |
| TEF              | 3.42  | E4BP4_Q1       | 3.96      | 1.08E-08 | 3.17      |
| MAX              | 22.88 | MYC_Q2         | 23.81     | 2.05E-08 | 3.31      |
| PPARGC1B         | 22.17 | PPARG_Q3       | 3.82      | 1.81E-07 | 3.26      |
| YY1A             | 12.67 | YY1_Q2         | 0.65      | 5.95E-07 | 3.00      |
| ARNTL1A          | 13.42 | CLOCKBMAL_Q6   | 23.52     | 1.56E-06 | 2.53      |
| ARNTL1B          | 12.79 | CLOCKBMAL_Q6   | 23.52     | 1.56E-06 | 2.53      |
| ARNTL2           | 16.29 | CLOCKBMAL_Q6   | 23.52     | 1.56E-06 | 2.53      |
| CLOCK            | 15.08 | CLOCKBMAL_Q6   | 23.52     | 1.56E-06 | 2.53      |
| CLOCK3           | 15.08 | CLOCKBMAL_Q6   | 23.52     | 1.56E-06 | 2.53      |
| NFIL3            | 14.42 | HLF_Q1         | 4.63      | 6.85E-06 | 2.80      |
| TEF              | 3.42  | HLF_Q1         | 4.63      | 6.85E-06 | 2.80      |
| MAX              | 22.88 | NMYC_Q1        | 0.77      | 9.19E-06 | 2.47      |
| USF1             | 13.17 | USF_Q2         | 17.14     | 1.85E-05 | 2.65      |
| FOXO3B           | 12.42 | FOXO1_Q2       | 15.89     | 2.35E-05 | 2.70      |
| YY1A             | 12.67 | YY1_Q6         | 0.10      | 3.31E-05 | 2.25      |
| ATF4B1           | 15.75 | CREBP1_Q1      | 3.72      | 3.95E-05 | 2.49      |
| ATF6             | 2.58  | CREBP1_Q1      | 3.72      | 3.95E-05 | 2.49      |
| CREB3L3          | 7.00  | CREBP1_Q1      | 3.72      | 3.95E-05 | 2.49      |
| SI:CH211-199M3.9 | 2.58  | CREBP1_Q1      | 3.72      | 3.95E-05 | 2.49      |
| PPARGC1B         | 22.17 | PPAR_DR1_Q2    | 3.82      | 4.63E-05 | 2.37      |
| NR1D1            | 23.75 | RORA2_Q1       | 12.43     | 5.41E-05 | 3.11      |
| NR1D4A           | 19.83 | RORA2_Q1       | 12.43     | 5.41E-05 | 3.11      |
| NR1D4B           | 19.75 | RORA2_Q1       | 12.43     | 5.41E-05 | 3.11      |
| RORAB            | 7.50  | RORA2_Q1       | 12.43     | 5.41E-05 | 3.11      |
| FOXO3B           | 12.42 | FOXO4_Q2       | 12.77     | 8.52E-05 | 3.01      |
| TCF12            | 13.75 | HEB_Q6         | 12.84     | 1.41E-04 | 3.56      |
| USF1             | 13.17 | USF_C          | 23.52     | 1.42E-04 | 2.58      |
| PPARGC1B         | 22.17 | PPARA_Q1       | 5.02      | 2.10E-04 | 2.77      |
| NR1D1            | 23.75 | RORA1_Q1       | 21.22     | 2.17E-04 | 3.47      |
| NR1D4A           | 19.83 | RORA1_Q1       | 21.22     | 2.17E-04 | 3.47      |
| NR1D4B           | 19.75 | RORA1_Q1       | 21.22     | 2.17E-04 | 3.47      |
| RORAB            | 7.50  | RORA1_Q1       | 21.22     | 2.17E-04 | 3.47      |
| MYOG             | 10.63 | E47_Q1         | 16.10     | 2.40E-04 | 3.37      |
| TCF12            | 13.75 | E47_Q1         | 16.10     | 2.40E-04 | 3.37      |
| HNF1A            | 4.42  | HNF1_C         | 5.14      | 2.87E-04 | 2.67      |
| MECOM            | 12.58 | EVI1_Q4        | 9.96      | 2.95E-04 | 8.11      |
| AR               | 5.17  | AR_Q2          | 4.34      | 2.96E-04 | 3.09      |
| CEBPA            | 22.42 | CEBP_Q2_Q1     | 5.98      | 3.64E-04 | 3.24      |
| MYOG             | 10.63 | E2A_Q6         | 20.81     | 5.22E-04 | 5.70      |
| TCF12            | 13.75 | E2A_Q6         | 20.81     | 5.22E-04 | 5.70      |
| ATF4B1           | 15.75 | CREB_Q1        | 0.67      | 6.24E-04 | 1.83      |
| ATF6             | 2.58  | CREB_Q1        | 0.67      | 6.24E-04 | 1.83      |
| CREB3L3          | 7.00  | CREB_Q1        | 0.67      | 6.24E-04 | 1.83      |
| SI:CH211-199M3.9 | 2.58  | CREB_Q1        | 0.67      | 6.24E-04 | 1.83      |
| PPARGC1B         | 22.17 | PPARG_Q1       | 5.26      | 6.30E-04 | 2.17      |
| ATF4B1           | 15.75 | ATF1_Q6        | 20.86     | 6.36E-04 | 2.69      |
| ATF6             | 2.58  | ATF1_Q6        | 20.86     | 6.36E-04 | 2.69      |
| CREB3L3          | 7.00  | ATF1_Q6        | 20.86     | 6.36E-04 | 2.69      |
| SI:CH211-199M3.9 | 2.58  | ATF1_Q6        | 20.86     | 6.36E-04 | 2.69      |
| AR               | 5.17  | AR_Q2          | 10.68     | 7.15E-04 | 3.96      |
| NFYBB            | 16.92 | NFY_C          | 4.75      | 9.31E-04 | 2.01      |
| CEBPA            | 22.42 | CEBPDELTA_Q6   | 14.35     | 9.75E-04 | 3.91      |
| NFYBB            | 16.92 | NFY_Q1         | 7.44      | 1.11E-03 | 2.21      |

**Table S7: Circadian phase of transcription factor and their targets.**

| TF               | TF PK | TRANSFAC MOTIF | Target PK | P value  | Odd Ratio |
|------------------|-------|----------------|-----------|----------|-----------|
| ARNTL1A          | 13.42 | ARNT_02        | 17.88     | 1.14E-03 | 1.92      |
| ARNTL1B          | 12.79 | ARNT_02        | 17.88     | 1.14E-03 | 1.92      |
| ARNTL2           | 16.29 | ARNT_02        | 17.88     | 1.14E-03 | 1.92      |
| CLOCK            | 15.08 | ARNT_02        | 17.88     | 1.14E-03 | 1.92      |
| CLOCK3           | 15.08 | ARNT_02        | 17.88     | 1.14E-03 | 1.92      |
| CEBPA            | 22.42 | CEBPGAMMA_Q6   | 9.05      | 1.18E-03 | 6.01      |
| SMAD1            | 20.33 | SMAD3_Q6       | 15.65     | 1.21E-03 | 2.90      |
| SMAD3A           | 4.42  | SMAD3_Q6       | 15.65     | 1.21E-03 | 2.90      |
| MYOG             | 10.63 | MYOD_Q6        | 17.26     | 1.31E-03 | 4.06      |
| TCF12            | 13.75 | MYOD_Q6        | 17.26     | 1.31E-03 | 4.06      |
| ATF4B1           | 15.75 | ATF6_01        | 22.34     | 1.64E-03 | 2.66      |
| ATF6             | 2.58  | ATF6_01        | 22.34     | 1.64E-03 | 2.66      |
| CREB3L3          | 7.00  | ATF6_01        | 22.34     | 1.64E-03 | 2.66      |
| SI:CH211-199M3.9 | 2.58  | ATF6_01        | 22.34     | 1.64E-03 | 2.66      |
| NFIL3            | 14.42 | TEF_Q6         | 6.14      | 1.68E-03 | 2.92      |
| TEF              | 3.42  | TEF_Q6         | 6.14      | 1.68E-03 | 2.92      |
| ATF4B1           | 15.75 | CREB_Q4_01     | 0.43      | 1.83E-03 | 1.79      |
| ATF6             | 2.58  | CREB_Q4_01     | 0.43      | 1.83E-03 | 1.79      |
| CREB3L3          | 7.00  | CREB_Q4_01     | 0.43      | 1.83E-03 | 1.79      |
| SI:CH211-199M3.9 | 2.58  | CREB_Q4_01     | 0.43      | 1.83E-03 | 1.79      |
| USF1             | 13.17 | USF_01         | 18.17     | 1.90E-03 | 1.89      |
| FOXO3B           | 12.42 | FOXO3_01       | 14.02     | 1.94E-03 | 2.18      |
| ATF4B1           | 15.75 | CREB_02        | 0.43      | 2.12E-03 | 2.01      |
| ATF6             | 2.58  | CREB_02        | 0.43      | 2.12E-03 | 2.01      |
| CREB3L3          | 7.00  | CREB_02        | 0.43      | 2.12E-03 | 2.01      |
| SI:CH211-199M3.9 | 2.58  | CREB_02        | 0.43      | 2.12E-03 | 2.01      |
| ATF4B1           | 15.75 | ATF_B          | 0.43      | 2.44E-03 | 1.83      |
| ATF6             | 2.58  | ATF_B          | 0.43      | 2.44E-03 | 1.83      |
| CREB3L3          | 7.00  | ATF_B          | 0.43      | 2.44E-03 | 1.83      |
| SI:CH211-199M3.9 | 2.58  | ATF_B          | 0.43      | 2.44E-03 | 1.83      |
| ATF4B1           | 15.75 | CREB_Q2        | 2.09      | 2.66E-03 | 1.77      |
| ATF6             | 2.58  | CREB_Q2        | 2.09      | 2.66E-03 | 1.77      |
| CREB3L3          | 7.00  | CREB_Q2        | 2.09      | 2.66E-03 | 1.77      |
| SI:CH211-199M3.9 | 2.58  | CREB_Q2        | 2.09      | 2.66E-03 | 1.77      |
| MYOG             | 10.63 | MYOD_01        | 18.05     | 2.73E-03 | 2.55      |
| TCF12            | 13.75 | MYOD_01        | 18.05     | 2.73E-03 | 2.55      |
| FOXO3B           | 12.42 | FREAC2_01      | 11.09     | 3.60E-03 | 3.35      |
| FOXO3B           | 12.42 | FOXP3_Q4       | 11.42     | 3.82E-03 | 3.35      |
| CDX1A            | 15.83 | CDX2_Q5        | 7.06      | 3.86E-03 | 3.39      |
| CDX1B            | 14.33 | CDX2_Q5        | 7.06      | 3.86E-03 | 3.39      |
| MAF              | 1.50  | NFE2_01        | 13.51     | 3.98E-03 | 2.25      |
| NFE2L1           | 9.50  | NFE2_01        | 13.51     | 3.98E-03 | 2.25      |
| NFE2L2           | 7.08  | NFE2_01        | 13.51     | 3.98E-03 | 2.25      |
| MECOM            | 12.58 | EVI1_05        | 5.98      | 5.02E-03 | 2.59      |
| MAX              | 22.88 | MYCMAX_B       | 18.05     | 5.15E-03 | 2.20      |
| MAF              | 1.50  | MAF_Q6_01      | 14.09     | 5.20E-03 | 2.18      |
| NFE2L1           | 9.50  | MAF_Q6_01      | 14.09     | 5.20E-03 | 2.18      |
| NFE2L2           | 7.08  | MAF_Q6_01      | 14.09     | 5.20E-03 | 2.18      |
| MAX              | 22.88 | MYCMAX_03      | 23.69     | 5.25E-03 | 1.70      |
| MYOG             | 10.63 | MYOD_Q6_01     | 14.69     | 5.42E-03 | 2.39      |
| TCF12            | 13.75 | MYOD_Q6_01     | 14.69     | 5.42E-03 | 2.39      |
| FOXA1            | 14.67 | HNF3ALPHA_Q6   | 11.30     | 5.65E-03 | 4.36      |
| MITFA            | 21.42 | TFE_Q6         | 18.55     | 5.77E-03 | 2.46      |
| MYOG             | 10.63 | E12_Q6         | 14.93     | 5.96E-03 | 2.52      |
| TCF12            | 13.75 | E12_Q6         | 14.93     | 5.96E-03 | 2.52      |

**Table S7: Circadian phase of transcription factor and their targets.**

| TF               | TF PK | TRANSFAC MOTIF | Target PK | P value  | Odd Ratio |
|------------------|-------|----------------|-----------|----------|-----------|
| FOXO3B           | 12.42 | FOXO3_Q1       | 8.59      | 6.68E-03 | 4.88      |
| ATF4B1           | 15.75 | CREB_Q2_Q1     | 1.51      | 7.01E-03 | 1.70      |
| ATF6             | 2.58  | CREB_Q2_Q1     | 1.51      | 7.01E-03 | 1.70      |
| CREB3L3          | 7.00  | CREB_Q2_Q1     | 1.51      | 7.01E-03 | 1.70      |
| SI:CH211-199M3.9 | 2.58  | CREB_Q2_Q1     | 1.51      | 7.01E-03 | 1.70      |
| ATF4B1           | 15.75 | CREBATF_Q6     | 22.63     | 7.18E-03 | 1.79      |
| ATF6             | 2.58  | CREBATF_Q6     | 22.63     | 7.18E-03 | 1.79      |
| CREB3L3          | 7.00  | CREBATF_Q6     | 22.63     | 7.18E-03 | 1.79      |
| SI:CH211-199M3.9 | 2.58  | CREBATF_Q6     | 22.63     | 7.18E-03 | 1.79      |
| HSF2             | 3.75  | HSF1_Q6        | 3.96      | 7.62E-03 | 2.12      |
| MAF              | 1.50  | MAF_Q6         | 14.06     | 7.78E-03 | 2.60      |
| NFE2L1           | 9.50  | MAF_Q6         | 14.06     | 7.78E-03 | 2.60      |
| NFE2L2           | 7.08  | MAF_Q6         | 14.06     | 7.78E-03 | 2.60      |
| HNF1A            | 4.42  | HNF1_Q6_Q1     | 4.44      | 7.93E-03 | 2.02      |
| MEF2A            | 1.50  | MEF2_Q6_Q1     | 2.06      | 7.94E-03 | 2.70      |
| CEBPA            | 22.42 | CEBP_Q2        | 21.02     | 8.05E-03 | 2.78      |
| SMAD1            | 20.33 | SMAD4_Q6       | 21.72     | 8.08E-03 | 3.03      |
| SMAD3A           | 4.42  | SMAD4_Q6       | 21.72     | 8.08E-03 | 3.03      |
| NFYBB            | 16.92 | NFY_Q6         | 2.54      | 8.33E-03 | 1.64      |
| XBP1             | 2.92  | XBP1_Q1        | 23.42     | 8.56E-03 | 2.14      |
| NR1D1            | 23.75 | RORA_Q4        | 14.42     | 8.97E-03 | 2.08      |
| NR1D4A           | 19.83 | RORA_Q4        | 14.42     | 8.97E-03 | 2.08      |
| NR1D4B           | 19.75 | RORA_Q4        | 14.42     | 8.97E-03 | 2.08      |
| RORAB            | 7.50  | RORA_Q4        | 14.42     | 8.97E-03 | 2.08      |
| FLI1B            | 14.17 | NERF_Q2        | 11.52     | 9.62E-03 | 3.07      |
| MECOM            | 12.58 | EVI1_Q6        | 21.10     | 9.69E-03 | 2.89      |
| PAX6A            | 15.50 | PAX6_Q1        | 4.13      | 9.95E-03 | 2.59      |
| NFYBB            | 16.92 | ALPHACP1_Q1    | 7.85      | 1.03E-02 | 2.24      |
| MAX              | 22.88 | MYCMAX_Q1      | 2.88      | 1.07E-02 | 1.82      |
| FLI1B            | 14.17 | ETS_Q4         | 14.30     | 1.11E-02 | 2.28      |
| USF1             | 13.17 | USF_Q6_Q1      | 20.88     | 1.13E-02 | 2.20      |
| ATF4B1           | 15.75 | CREB_Q4        | 2.09      | 1.20E-02 | 1.56      |
| ATF6             | 2.58  | CREB_Q4        | 2.09      | 1.20E-02 | 1.56      |
| CREB3L3          | 7.00  | CREB_Q4        | 2.09      | 1.20E-02 | 1.56      |
| SI:CH211-199M3.9 | 2.58  | CREB_Q4        | 2.09      | 1.20E-02 | 1.56      |
| CDX1A            | 15.83 | CDXA_Q1        | 2.88      | 1.24E-02 | 2.59      |
| CDX1B            | 14.33 | CDXA_Q1        | 2.88      | 1.24E-02 | 2.59      |
| MEF2A            | 1.50  | MEF2_Q1        | 9.96      | 1.24E-02 | 4.05      |
| MEF2A            | 1.50  | RSRFC4_Q1      | 10.18     | 1.25E-02 | 3.48      |
| HIF1AB           | 23.42 | HIF1_Q3        | 21.38     | 1.32E-02 | 2.30      |
| PAX6A            | 15.50 | PAX_Q6         | 9.96      | 1.37E-02 | 3.94      |
| NFYBB            | 16.92 | NFY_Q6_Q1      | 4.75      | 1.39E-02 | 1.62      |
| MAX              | 22.88 | MYCMAX_Q2      | 23.52     | 1.40E-02 | 1.94      |
| MEF2A            | 1.50  | AMEF2_Q6       | 3.17      | 1.40E-02 | 1.98      |
| PPARGC1B         | 22.17 | PPARG_Q2       | 20.09     | 1.41E-02 | 2.56      |
| MAF              | 1.50  | NRF1_Q6        | 13.75     | 1.45E-02 | 1.59      |
| NFE2L1           | 9.50  | NRF1_Q6        | 13.75     | 1.45E-02 | 1.59      |
| NFE2L2           | 7.08  | NRF1_Q6        | 13.75     | 1.45E-02 | 1.59      |
| NR3C1            | 13.71 | GR_Q1          | 21.34     | 1.47E-02 | 2.67      |
| FOXO3B           | 12.42 | XFD2_Q1        | 3.17      | 1.53E-02 | 2.14      |
| GTF2A1           | 3.92  | TFIIA_Q6       | 4.51      | 1.54E-02 | 2.17      |
| FOXO3B           | 12.42 | HFH1_Q1        | 13.10     | 1.58E-02 | 2.05      |
| MAX              | 22.88 | MAX_Q1         | 23.52     | 1.58E-02 | 1.69      |
| ATF4B1           | 15.75 | CREBP1CJUN_Q1  | 19.68     | 1.58E-02 | 1.95      |
| ATF6             | 2.58  | CREBP1CJUN_Q1  | 19.68     | 1.58E-02 | 1.95      |

**Table S7: Circadian phase of transcription factor and their targets.**

| TF               | TF PK | TRANSFAC MOTIF | Target PK | P value  | Odd Ratio |
|------------------|-------|----------------|-----------|----------|-----------|
| CREB3L3          | 7.00  | CREBP1CJUN_01  | 19.68     | 1.58E-02 | 1.95      |
| SI:CH211-199M3.9 | 2.58  | CREBP1CJUN_01  | 19.68     | 1.58E-02 | 1.95      |
| MECOM            | 12.58 | EVI1_03        | 5.98      | 1.60E-02 | 2.33      |
| MECOM            | 12.58 | EVI1_02        | 10.75     | 1.64E-02 | 2.95      |
| NR3C1            | 13.71 | GR_Q6          | 17.06     | 1.67E-02 | 2.20      |
| ATF4B1           | 15.75 | ATF3_Q6        | 19.92     | 1.70E-02 | 1.98      |
| ATF6             | 2.58  | ATF3_Q6        | 19.92     | 1.70E-02 | 1.98      |
| CREB3L3          | 7.00  | ATF3_Q6        | 19.92     | 1.70E-02 | 1.98      |
| SI:CH211-199M3.9 | 2.58  | ATF3_Q6        | 19.92     | 1.70E-02 | 1.98      |
| MAF              | 1.50  | TCF11MAFG_01   | 3.48      | 1.78E-02 | 2.05      |
| NFE2L1           | 9.50  | TCF11MAFG_01   | 3.48      | 1.78E-02 | 2.05      |
| NFE2L2           | 7.08  | TCF11MAFG_01   | 3.48      | 1.78E-02 | 2.05      |
| FOXO3B           | 12.42 | FOXJ2_01       | 9.94      | 1.79E-02 | 4.51      |
| FLI1B            | 14.17 | ELF1_Q6        | 21.10     | 1.80E-02 | 2.55      |
| NFIL3            | 14.42 | DBP_Q6         | 15.43     | 1.81E-02 | 2.81      |
| TEF              | 3.42  | DBP_Q6         | 15.43     | 1.81E-02 | 2.81      |
| USF1             | 13.17 | USF_Q6         | 15.77     | 1.82E-02 | 1.69      |
| CEBPA            | 22.42 | CEBP_C         | 16.92     | 2.07E-02 | 1.95      |
| FLI1B            | 14.17 | ETS2_B         | 16.06     | 2.10E-02 | 2.05      |
| MEF2A            | 1.50  | MMEF2_Q6       | 9.05      | 2.11E-02 | 3.50      |
| FLI1B            | 14.17 | ETS_Q6         | 7.27      | 2.11E-02 | 3.15      |
| FLI1B            | 14.17 | ELK1_02        | 1.92      | 2.13E-02 | 1.71      |
| SMAD1            | 20.33 | SMAD_Q6        | 17.26     | 2.33E-02 | 4.02      |
| SMAD3A           | 4.42  | SMAD_Q6        | 17.26     | 2.33E-02 | 4.02      |
| HSF2             | 3.75  | HSF2_01        | 2.98      | 2.37E-02 | 1.97      |
| BHLHE40          | 5.25  | DEC_Q1         | 12.43     | 2.41E-02 | 2.26      |
| BHLHE41          | 0.54  | DEC_Q1         | 12.43     | 2.41E-02 | 2.26      |
| MAX              | 22.88 | EBOX_Q6_01     | 15.55     | 2.62E-02 | 1.83      |
| MXD3             | 12.67 | EBOX_Q6_01     | 15.55     | 2.62E-02 | 1.83      |
| MYCB             | 4.00  | EBOX_Q6_01     | 15.55     | 2.62E-02 | 1.83      |
| TCF12            | 13.75 | EBOX_Q6_01     | 15.55     | 2.62E-02 | 1.83      |
| FLI1B            | 14.17 | PEA3_Q6        | 14.69     | 2.64E-02 | 2.73      |
| NR3C1            | 13.71 | GRE_C          | 20.35     | 2.66E-02 | 2.51      |
| CEBPA            | 22.42 | CEBP_Q3        | 5.54      | 2.76E-02 | 2.38      |
| SMAD1            | 20.33 | SMAD_Q6_01     | 17.18     | 2.79E-02 | 2.17      |
| SMAD3A           | 4.42  | SMAD_Q6_01     | 17.18     | 2.79E-02 | 2.17      |
| PPARGC1B         | 22.17 | PPARA_02       | 9.96      | 2.82E-02 | 3.85      |
| HOXA4A           | 16.92 | HOXA3_01       | 17.98     | 2.83E-02 | 2.13      |
| FOXO3B           | 12.42 | FOXO1_01       | 17.69     | 2.84E-02 | 2.47      |
| AHR1A            | 2.83  | AHR_01         | 19.27     | 2.92E-02 | 2.19      |
| MAF              | 1.50  | NRF2_01        | 23.30     | 3.04E-02 | 1.74      |
| NFE2L1           | 9.50  | NRF2_01        | 23.30     | 3.04E-02 | 1.74      |
| NFE2L2           | 7.08  | NRF2_01        | 23.30     | 3.04E-02 | 1.74      |
| HIF1AB           | 23.42 | HIF1_Q5        | 22.44     | 3.10E-02 | 2.04      |
| MEF2A            | 1.50  | HMEF2_Q6       | 2.54      | 3.11E-02 | 1.95      |
| MEF2A            | 1.50  | RSRFC4_Q2      | 22.68     | 3.12E-02 | 2.16      |
| MAF              | 1.50  | NRF2_Q4        | 18.55     | 3.19E-02 | 1.93      |
| NFE2L1           | 9.50  | NRF2_Q4        | 18.55     | 3.19E-02 | 1.93      |
| NFE2L2           | 7.08  | NRF2_Q4        | 18.55     | 3.19E-02 | 1.93      |
| AR               | 5.17  | AR_01          | 20.26     | 3.20E-02 | 2.22      |
| MEF2A            | 1.50  | MEF2_02        | 17.26     | 3.66E-02 | 1.91      |
| FOXO3B           | 12.42 | FREAC3_01      | 14.93     | 3.70E-02 | 1.88      |
| MECOM            | 12.58 | EVI1_01        | 4.34      | 3.80E-02 | 1.99      |
| TFCP2L1          | 14.67 | CP2_01         | 11.52     | 3.87E-02 | 2.68      |
| CEBPA            | 22.42 | CEBPA_01       | 6.05      | 3.92E-02 | 2.21      |

**Table S7: Circadian phase of transcription factor and their targets.**

| TF               | TF PK | TRANSFAC MOTIF | Target PK | P value  | Odd Ratio |
|------------------|-------|----------------|-----------|----------|-----------|
| MYOG             | 10.63 | MYOGENIN_Q6    | 13.27     | 4.15E-02 | 3.06      |
| TCF12            | 13.75 | MYOGENIN_Q6    | 13.27     | 4.15E-02 | 3.06      |
| FOXO3B           | 12.42 | HFH3_01        | 21.89     | 4.21E-02 | 2.47      |
| MAF              | 1.50  | CMAF_01        | 6.50      | 4.53E-02 | 2.07      |
| NFE2L1           | 9.50  | CMAF_01        | 6.50      | 4.53E-02 | 2.07      |
| NFE2L2           | 7.08  | CMAF_01        | 6.50      | 4.53E-02 | 2.07      |
| MYOG             | 10.63 | E47_02         | 19.46     | 4.61E-02 | 2.52      |
| TCF12            | 13.75 | E47_02         | 19.46     | 4.61E-02 | 2.52      |
| AHR1A            | 2.83  | AHRHIF_Q6      | 3.50      | 4.64E-02 | 2.43      |
| HIF1AB           | 23.42 | AHRHIF_Q6      | 3.50      | 4.64E-02 | 2.43      |
| YY1A             | 12.67 | YY1_01         | 23.23     | 4.74E-02 | 2.09      |
| RARAA            | 12.17 | DR4_Q2         | 19.46     | 4.88E-02 | 2.02      |
| FOXO3B           | 12.42 | FOXO3A_Q1      | 3.82      | 4.98E-02 | 2.15      |
| FOXO3B           | 12.42 | FOXO4_01       | 14.42     | 5.14E-02 | 1.99      |
| ATF4B1           | 15.75 | ATF_01         | 19.46     | 5.29E-02 | 1.73      |
| ATF6             | 2.58  | ATF_01         | 19.46     | 5.29E-02 | 1.73      |
| CREB3L3          | 7.00  | ATF_01         | 19.46     | 5.29E-02 | 1.73      |
| SI:CH211-199M3.9 | 2.58  | ATF_01         | 19.46     | 5.29E-02 | 1.73      |
| HNF1A            | 4.42  | HNF1_Q6        | 6.60      | 5.33E-02 | 1.85      |
| AHR1A            | 2.83  | AHR_Q5         | 5.23      | 5.57E-02 | 2.04      |
| HNF1A            | 4.42  | HNF1_01        | 20.18     | 5.72E-02 | 1.81      |
| AR               | 5.17  | AR_03          | 1.90      | 5.80E-02 | 1.79      |
| FOXO3B           | 12.42 | XFD1_01        | 14.64     | 5.89E-02 | 1.73      |
| FOXA1            | 14.67 | HNF3_Q6        | 10.44     | 5.95E-02 | 2.98      |
| TFCP2L1          | 14.67 | CP2_02         | 18.77     | 5.95E-02 | 2.27      |
| FLI1B            | 14.17 | CETS168_Q6     | 20.26     | 6.05E-02 | 2.19      |
| CRX              | 16.63 | CRX_Q4         | 14.18     | 6.09E-02 | 1.84      |
| FOXO3B           | 12.42 | FOXJ2_02       | 2.18      | 6.21E-02 | 1.72      |
| HSF2             | 3.75  | HSF1_01        | 2.98      | 6.24E-02 | 1.80      |
| FOXO3B           | 12.42 | FREAC4_01      | 15.72     | 6.37E-02 | 1.59      |
| MEF2A            | 1.50  | MEF2_03        | 15.50     | 6.38E-02 | 1.84      |
| FLI1B            | 14.17 | GABP_B         | 9.43      | 6.74E-02 | 2.46      |
| CEBPA            | 22.42 | CEBP_01        | 9.96      | 6.81E-02 | 2.81      |
| FOXO3B           | 12.42 | FOX_Q2         | 10.68     | 6.86E-02 | 2.84      |
| MAF              | 1.50  | TCF11_01       | 2.69      | 6.91E-02 | 2.38      |
| NFE2L1           | 9.50  | TCF11_01       | 2.69      | 6.91E-02 | 2.38      |
| NFE2L2           | 7.08  | TCF11_01       | 2.69      | 6.91E-02 | 2.38      |
| FLI1B            | 14.17 | CETS1P54_02    | 23.42     | 7.18E-02 | 1.78      |
| FLI1B            | 14.17 | PU1_Q6         | 9.96      | 7.69E-02 | 3.30      |
| FLI1B            | 14.17 | ELK1_01        | 1.51      | 7.70E-02 | 1.75      |
| CEBPA            | 22.42 | CEBPB_01       | 5.09      | 8.03E-02 | 2.32      |
| CEBPA            | 22.42 | CEBPB_02       | 9.50      | 8.28E-02 | 2.30      |
| FOXO3B           | 12.42 | HFH4_01        | 7.44      | 8.35E-02 | 2.34      |
| MAF              | 1.50  | VMAF_01        | 21.26     | 8.83E-02 | 2.02      |
| NFE2L1           | 9.50  | VMAF_01        | 21.26     | 8.83E-02 | 2.02      |
| NFE2L2           | 7.08  | VMAF_01        | 21.26     | 8.83E-02 | 2.02      |
| FLI1B            | 14.17 | CETS1P54_01    | 2.47      | 9.00E-02 | 1.66      |
| FOXA1            | 14.67 | HNF3_Q6_01     | 10.56     | 9.15E-02 | 2.53      |
| FLI1B            | 14.17 | ETS1_B         | 9.96      | 9.26E-02 | 2.49      |
| HOXA4A           | 16.92 | HOXA4_Q2       | 18.10     | 9.63E-02 | 2.66      |
| FOXO3B           | 12.42 | FOXO1_01       | 18.67     | 9.72E-02 | 2.11      |
| FOXO3B           | 12.42 | HFH8_01        | 13.10     | 9.93E-02 | 1.71      |
| ATF4B1           | 15.75 | ATF4_Q2        | 1.85      | 1.01E-01 | 1.48      |
| ATF6             | 2.58  | ATF4_Q2        | 1.85      | 1.01E-01 | 1.48      |
| CREB3L3          | 7.00  | ATF4_Q2        | 1.85      | 1.01E-01 | 1.48      |

**Table S7: Circadian phase of transcription factor and their targets.**

| TF               | TF PK | TRANSFAC MOTIF | Target PK | P value  | Odd Ratio |
|------------------|-------|----------------|-----------|----------|-----------|
| SI:CH211-199M3.9 | 2.58  | ATF4_Q2        | 1.85      | 1.01E-01 | 1.48      |
| ATF4B1           | 15.75 | CREBP1_Q2      | 19.75     | 1.01E-01 | 1.54      |
| ATF6             | 2.58  | CREBP1_Q2      | 19.75     | 1.01E-01 | 1.54      |
| CREB3L3          | 7.00  | CREBP1_Q2      | 19.75     | 1.01E-01 | 1.54      |
| SI:CH211-199M3.9 | 2.58  | CREBP1_Q2      | 19.75     | 1.01E-01 | 1.54      |
| FOXO3B           | 12.42 | FOXP1_01       | 18.77     | 1.02E-01 | 1.89      |
| CDX1A            | 15.83 | CDX_Q5         | 2.35      | 1.03E-01 | 1.69      |
| CDX1B            | 14.33 | CDX_Q5         | 2.35      | 1.03E-01 | 1.69      |
| HOXA4A           | 16.92 | HOX13_01       | 0.10      | 1.04E-01 | 1.72      |
| TGIF1            | 13.67 | TGIF_01        | 0.77      | 1.22E-01 | 1.59      |
| ATF4B1           | 15.75 | CREB_Q3        | 17.38     | 1.28E-01 | 6.94      |
| ATF6             | 2.58  | CREB_Q3        | 17.38     | 1.28E-01 | 6.94      |
| CREB3L3          | 7.00  | CREB_Q3        | 17.38     | 1.28E-01 | 6.94      |
| SI:CH211-199M3.9 | 2.58  | CREB_Q3        | 17.38     | 1.28E-01 | 6.94      |
| FLI1B            | 14.17 | TEL2_Q6        | 18.96     | 1.32E-01 | 1.54      |
| HSF2             | 3.75  | HSF_Q6         | 3.48      | 1.45E-01 | 1.48      |
| PAX6A            | 15.50 | PAX6_Q2        | 17.98     | 1.50E-01 | 1.60      |
| ARNTL1A          | 13.42 | ARNT_01        | 23.69     | 1.50E-01 | 1.38      |
| ARNTL1B          | 12.79 | ARNT_01        | 23.69     | 1.50E-01 | 1.38      |
| ARNTL2           | 16.29 | ARNT_01        | 23.69     | 1.50E-01 | 1.38      |
| CLOCK            | 15.08 | ARNT_01        | 23.69     | 1.50E-01 | 1.38      |
| CLOCK3           | 15.08 | ARNT_01        | 23.69     | 1.50E-01 | 1.38      |
| FOXO3B           | 12.42 | XFD3_01        | 23.88     | 1.67E-01 | 1.54      |
| MEF2A            | 1.50  | MEF2_04        | 17.52     | 2.05E-01 | 1.50      |
| MYOG             | 10.63 | E2A_Q2         | 14.18     | 2.07E-01 | 1.53      |
| TCF12            | 13.75 | E2A_Q2         | 14.18     | 2.07E-01 | 1.53      |
| FOXO3B           | 12.42 | FREAC7_01      | 0.02      | 2.12E-01 | 1.51      |
| CDX1A            | 15.83 | CDXA_02        | NA        | NA       | NA        |
| CDX1B            | 14.33 | CDXA_02        | NA        | NA       | NA        |
| USF1             | 13.17 | USF2_Q6        | NA        | NA       | NA        |
