# Supplementary material for: Analysis of a Gene Regulatory Cascade Mediating Circadian Rhythm in Zebrafish
Source: PubMed Central journal article supplement (PMC3585402; doi:10.1371/journal.pcbi.1002940), 2013-02-28
Supplement: pcbi.1002940.s013.pdf [file pcbi.1002940.s013.pdf]

**Table S8: Enrichment of co-expressed genes in circadian genes, circadian phase, and TF binding sites.**

| ClusterID | Circadian Gene Enrich p value | Circadian Gene Enrich Odd Ratio | Enriched Pk | PK Enrich p value | Pk Enrich Odd Ratio | Matrix AC    | TF Enrich p value | TF Enrich Odd Ratio |
|-----------|-------------------------------|---------------------------------|-------------|-------------------|---------------------|--------------|-------------------|---------------------|
| 531       | 4.48E-06                      | 9.05                            | 5.23        | 1.75E-02          | 3.98                | PPAR_DR1_Q2  | 4.06E-04          | 14.96               |
| 183       | 7.42E-06                      | 3.85                            | 0.94        | 7.89E-12          | 59.35               | YY1_Q6_02    | 5.71E-07          | 7.75                |
| 181       | 1.14E-05                      | 3.70                            | 0.17        | 3.78E-10          | 21.41               | YY1_Q6_02    | 4.27E-07          | 8.01                |
| 174       | 2.30E-05                      | 0.07                            | 21.02       | 9.31E-02          | Inf                 | ELK1_02      | 2.01E-10          | 11.06               |
| 81        | 3.53E-05                      | 0.07                            | 18.02       | 1.91E-01          | Inf                 | TATA_01      | 8.18E-09          | 13.63               |
| 318       | 8.87E-05                      | 1.94                            | 23.76       | 2.54E-21          | 16.83               | MYC_Q2       | 4.70E-19          | 10.94               |
| 275       | 4.61E-04                      | 0.09                            | 23.52       | 2.06E-01          | Inf                 | ZNF219_01    | 6.81E-05          | 10.12               |
| 173       | 4.79E-04                      | 0.22                            | 18.65       | 8.14E-04          | Inf                 | CETS1P54_03  | 5.03E-06          | 7.07                |
| 169       | 5.24E-04                      | 2.71                            | 3.22        | 2.46E-02          | 2.84                | GATA1_03     | 5.36E-07          | 13.36               |
| 353       | 6.78E-04                      | 0.15                            | 21.55       | 1.87E-01          | 9.17                | E2F_Q6_01    | 3.99E-08          | 11.12               |
| 160       | 7.03E-04                      | 0.09                            | 8.18        | 5.58E-02          | Inf                 | SP1_Q4_01    | 5.43E-06          | 8.57                |
| 335       | 7.10E-04                      | 9.71                            | 22.51       | 8.80E-04          | 15.51               | NA           | NA                | NA                  |
| 48        | 1.95E-03                      | 5.55                            | 10.80       | 6.60E-02          | 5.90                | NA           | NA                | NA                  |
| 517       | 2.28E-03                      | 0.17                            | 17.02       | 6.14E-02          | Inf                 | RFX1_02      | 4.08E-09          | 14.71               |
| 71        | 2.49E-03                      | 0.10                            | 9.84        | 3.72E-02          | Inf                 | IRF_Q6       | 9.14E-14          | 59.87               |
| 56        | 2.60E-03                      | 8.32                            | 16.44       | 4.98E-02          | 5.40                | NA           | NA                | NA                  |
| 200       | 3.21E-03                      | 3.79                            | 20.06       | 1.50E-08          | 77.98               | LHX3_01      | 1.91E-04          | 11.57               |
| 340       | 3.32E-03                      | 0.18                            | 7.68        | 4.36E-03          | Inf                 | FXR_Q3       | 1.38E-04          | 11.79               |
| 525       | 3.60E-03                      | 2.72                            | 7.13        | 3.47E-02          | 3.91                | HNF1_01      | 1.15E-05          | 15.56               |
| 528       | 3.79E-03                      | 0.11                            | 10.27       | 4.40E-02          | Inf                 | TATA_01      | 1.17E-10          | 18.44               |
| 115       | 4.31E-03                      | 0.27                            | 13.51       | 1.97E-01          | 3.76                | FAC1_01      | 2.71E-07          | 14.83               |
| 532       | 4.87E-03                      | 3.47                            | 21.60       | 1.33E-02          | 5.99                | COUP_01      | 4.88E-04          | 14.23               |
| 171       | 5.43E-03                      | 6.24                            | 17.35       | 1.30E-01          | 3.48                | NA           | NA                | NA                  |
| 140       | 5.99E-03                      | 16.63                           | 13.63       | 2.02E-01          | 3.69                | NA           | NA                | NA                  |
| 386       | 6.07E-03                      | 0.11                            | 20.88       | 9.06E-02          | Inf                 | NA           | NA                | NA                  |
| 349       | 7.29E-03                      | 0.19                            | 23.93       | 5.25E-02          | Inf                 | E2F4DP2_01   | 1.31E-04          | 7.32                |
| 519       | 7.29E-03                      | 0.19                            | 9.84        | 7.30E-02          | 26.09               | NA           | NA                | NA                  |
| 457       | 8.15E-03                      | 0.25                            | 0.17        | 1.43E-01          | 6.43                | FAC1_01      | 8.55E-08          | 24.51               |
| 249       | 8.21E-03                      | 2.36                            | 23.26       | 4.61E-11          | 69.14               | CLOCKBMAL_Q6 | 1.58E-07          | 11.42               |
| 172       | 1.00E-02                      | 4.99                            | 13.63       | 1.16E-01          | 3.69                | NA           | NA                | NA                  |
| 247       | 1.04E-02                      | 2.04                            | 23.35       | 3.74E-07          | 10.51               | ELK1_02      | 5.25E-07          | 7.37                |
| 536       | 1.08E-02                      | 0.20                            | 7.46        | 5.22E-03          | Inf                 | STAT5A_02    | 7.80E-04          | 7.84                |

**Table S8: Enrichment of co-expressed genes in circadian genes, circadian phase, and TF binding sites.**

| ClusterID | Circadian Gene Enrich p value | Circadian Gene Enrich Odd Ratio | Enriched Pk | PK Enrich p value | Pk Enrich Odd Ratio | Matrix AC           | TF Enrich p value | TF Enrich Odd Ratio |
|-----------|-------------------------------|---------------------------------|-------------|-------------------|---------------------|---------------------|-------------------|---------------------|
| 324       | 1.13E-02                      | 0.20                            | 20.88       | 8.25E-03          | Inf                 | NA                  | NA                | NA                  |
| 104       | 1.52E-02                      | 8.31                            | 8.47        | 1.46E-02          | 18.77               | NA                  | NA                | NA                  |
| 352       | 1.57E-02                      | 0.38                            | 3.82        | 2.94E-02          | 6.61                | E2F_03              | 7.31E-17          | 18.14               |
| 82        | 1.57E-02                      | 0.22                            | 14.09       | 5.60E-02          | Inf                 | TATA_01             | 6.03E-08          | 12.87               |
| 106       | 1.57E-02                      | 2.15                            | 9.84        | 2.07E-02          | 6.05                | AREB6_01            | 8.25E-07          | 11.00               |
| 491       | 1.59E-02                      | 0.21                            | 9.84        | 7.30E-02          | 26.09               | LEF1TCF1_Q4         | 3.84E-08          | 20.62               |
| 518       | 2.40E-02                      | 0.29                            | 18.26       | 6.06E-03          | Inf                 | RFX1_02             | 2.46E-09          | 19.65               |
| 309       | 2.47E-02                      | 0.44                            | 22.34       | 7.60E-02          | 4.00                | OCT4_01             | 3.12E-05          | 11.53               |
| 417       | 2.96E-02                      | 2.68                            | 20.88       | 1.93E-01          | 2.89                | CREB_Q4_01          | 1.81E-04          | 12.56               |
| 437       | 2.97E-02                      | 0.59                            | 11.76       | 5.99E-03          | 4.59                | NFMUE1_Q6           | 2.55E-04          | 3.69                |
| 150       | 3.00E-02                      | 5.54                            | 7.34        | 3.02E-02          | 12.49               | MYCMAX_03           | 1.67E-04          | 82.59               |
| 98        | 3.09E-02                      | 0.15                            | 7.58        | 6.70E-02          | Inf                 | NA                  | NA                | NA                  |
| 78        | 3.31E-02                      | 0.45                            | 15.48       | 1.01E-03          | 17.33               | PU1_Q6              | 6.42E-08          | 14.25               |
| 479       | 3.34E-02                      | 0.34                            | 2.98        | 2.91E-01          | 2.74                | MYOD_01             | 5.42E-14          | 32.16               |
| 218       | 3.77E-02                      | 0.00                            | 5.54        | 2.49E-02          | Inf                 | NA                  | NA                | NA                  |
| 20        | 3.83E-02                      | 3.12                            | 17.47       | 1.21E-01          | 3.63                | USF_C               | 3.47E-04          | 29.02               |
| 168       | 3.91E-02                      | 1.86                            | 22.10       | 4.68E-02          | 3.04                | CRX_Q4              | 2.79E-07          | 14.94               |
| 419       | 4.48E-02                      | 3.47                            | 5.23        | 4.23E-02          | 6.97                | NA                  | NA                | NA                  |
| 54        | 4.48E-02                      | 3.47                            | 5.71        | 1.68E-01          | 3.75                | E2_01               | 6.48E-04          | 22.73               |
| 430       | 4.69E-02                      | 0.16                            | 11.69       | 8.44E-02          | Inf                 | YY1_Q6              | 1.29E-04          | 9.91                |
| 509       | 4.83E-02                      | 0.33                            | 10.58       | 1.48E-01          | 9.17                | AIRE_02             | 8.34E-04          | 7.70                |
| 511       | 4.86E-02                      | 0.32                            | 19.44       | 4.05E-02          | 14.56               | FOXD3_01            | 1.04E-04          | 12.23               |
| 74        | 5.10E-02                      | 4.16                            | 5.02        | 1.54E-01          | 4.51                | NA                  | NA                | NA                  |
| 33        | 5.35E-02                      | 6.23                            | 16.85       | 1.63E-01          | 5.81                | NA                  | NA                | NA                  |
| 137       | 6.49E-02                      | 2.97                            | 14.69       | 1.11E-01          | 4.35                | NA                  | NA                | NA                  |
| 359       | 6.79E-02                      | 0.34                            | 9.26        | 1.14E-01          | 12.23               | OREBINDINGFACTOR_Q6 | 4.32E-08          | 19.70               |
| 291       | 6.82E-02                      | 0.19                            | 19.44       | 1.21E-01          | Inf                 | NA                  | NA                | NA                  |
| 87        | 6.82E-02                      | 0.19                            | 9.84        | 3.72E-02          | Inf                 | NA                  | NA                | NA                  |
| 385       | 6.82E-02                      | 0.18                            | 18.67       | 1.64E-01          | Inf                 | NA                  | NA                | NA                  |
| 15        | 7.08E-02                      | 0.28                            | 3.89        | 5.17E-02          | Inf                 | TATA_01             | 6.63E-05          | 10.67               |
| 348       | 7.08E-02                      | 0.28                            | 10.90       | 1.11E-01          | 16.62               | UF1H3BETA_Q6        | 5.39E-04          | 8.83                |
| 462       | 7.08E-02                      | 0.28                            | 22.10       | 1.47E-02          | Inf                 | NA                  | NA                | NA                  |

**Table S8: Enrichment of co-expressed genes in circadian genes, circadian phase, and TF binding sites.**

| ClusterID | Circadian Gene Enrich p value | Circadian Gene Enrich Odd Ratio | Enriched Pk | PK Enrich p value | Pk Enrich Odd Ratio | Matrix AC  | TF Enrich p value | TF Enrich Odd Ratio |
|-----------|-------------------------------|---------------------------------|-------------|-------------------|---------------------|------------|-------------------|---------------------|
| 494       | 7.10E-02                      | 0.17                            | 6.89        | 9.80E-02          | Inf                 | TBP_Q6     | 6.12E-10          | 39.86               |
| 201       | 7.35E-02                      | 2.08                            | 21.60       | 2.93E-03          | 7.49                | NA         | NA                | NA                  |
| 521       | 7.52E-02                      | 2.43                            | 1.39        | 2.06E-02          | 6.52                | NA         | NA                | NA                  |
| 445       | 7.80E-02                      | 3.33                            | 4.44        | 2.66E-02          | 12.17               | NA         | NA                | NA                  |
| 167       | 7.82E-02                      | 1.99                            | 2.98        | 1.15E-02          | 4.80                | TATA_01    | 6.63E-05          | 10.67               |
| 182       | 8.50E-02                      | 1.91                            | 23.18       | 8.11E-06          | 20.62               | NA         | NA                | NA                  |
| 38        | 8.74E-02                      | 0.41                            | 0.60        | 2.73E-01          | 2.90                | ATF_01     | 4.42E-04          | 7.11                |
| 191       | 9.17E-02                      | 4.16                            | 19.63       | 3.55E-02          | 15.75               | NA         | NA                | NA                  |
| 5         | 9.17E-02                      | 4.16                            | 4.13        | 1.23E-01          | 7.14                | NA         | NA                | NA                  |
| 420       | 9.44E-02                      | 0.49                            | 16.34       | 5.18E-02          | 5.32                | NA         | NA                | NA                  |
| 246       | 9.84E-02                      | 8.31                            | 11.86       | 9.42E-03          | Inf                 | NA         | NA                | NA                  |
| 258       | 9.84E-02                      | 8.31                            | 11.76       | 8.48E-03          | Inf                 | NA         | NA                | NA                  |
| 300       | 1.01E-01                      | 0.21                            | 5.35        | 1.69E-01          | Inf                 | NFY_Q6_01  | 3.29E-04          | 8.39                |
| 401       | 1.02E-01                      | 0.30                            | 8.30        | 1.05E-01          | 17.63               | NA         | NA                | NA                  |
| 53        | 1.11E-01                      | 2.77                            | 18.05       | 2.38E-02          | 12.77               | NF1_Q6     | 1.49E-04          | 44.97               |
| 319       | 1.15E-01                      | 2.08                            | 18.26       | 7.46E-04          | 13.52               | NA         | NA                | NA                  |
| 323       | 1.25E-01                      | 0.54                            | 20.09       | 3.96E-02          | 5.36                | YY1_Q6_02  | 1.54E-06          | 5.65                |
| 475       | 1.25E-01                      | 0.54                            | 0.02        | 2.10E-01          | 0.00                | NA         | NA                | NA                  |
| 341       | 1.28E-01                      | 1.69                            | 6.60        | 4.28E-02          | 3.74                | NFY_01     | 9.83E-06          | 6.54                |
| 507       | 1.32E-01                      | 0.40                            | 9.84        | 1.07E-01          | 13.08               | NA         | NA                | NA                  |
| 94        | 1.35E-01                      | 1.64                            | 14.98       | 2.54E-02          | 0.00                | GC_01      | 8.93E-05          | 8.13                |
| 226       | 1.38E-01                      | 3.12                            | 22.85       | 6.88E-02          | 10.51               | NA         | NA                | NA                  |
| 387       | 1.42E-01                      | 0.48                            | 6.26        | 1.42E-02          | 11.12               | AHRARNT_02 | 3.62E-04          | 7.16                |
| 231       | 1.47E-01                      | 0.32                            | 16.75       | 6.77E-02          | Inf                 | NA         | NA                | NA                  |
| 529       | 1.49E-01                      | 2.60                            | 7.01        | 6.84E-02          | 6.72                | GATA4_Q3   | 1.21E-04          | 48.30               |
| 64        | 1.49E-01                      | 2.60                            | 7.27        | 4.22E-03          | 17.90               | NA         | NA                | NA                  |
| 159       | 1.51E-01                      | 0.23                            | 11.35       | 7.20E-02          | Inf                 | OLF1_01    | 1.57E-05          | 21.00               |
| 230       | 1.51E-01                      | 0.23                            | 20.88       | 9.06E-02          | Inf                 | NA         | NA                | NA                  |
| 274       | 1.51E-01                      | 0.23                            | 23.38       | 1.94E-01          | Inf                 | E2F4DP2_01 | 6.26E-05          | 16.24               |
| 117       | 1.53E-01                      | 0.22                            | 5.42        | 1.64E-01          | Inf                 | NA         | NA                | NA                  |
| 267       | 1.53E-01                      | 0.22                            | 13.10       | 1.73E-01          | Inf                 | E2_Q6      | 2.07E-04          | 16.71               |
| 426       | 1.53E-01                      | 0.22                            | 20.88       | 9.06E-02          | Inf                 | NA         | NA                | NA                  |

**Table S8: Enrichment of co-expressed genes in circadian genes, circadian phase, and TF binding sites.**

| ClusterID | Circadian Gene Enrich p value | Circadian Gene Enrich Odd Ratio | Enriched Pk | PK Enrich p value | Pk Enrich Odd Ratio | Matrix AC      | TF Enrich p value | TF Enrich Odd Ratio |
|-----------|-------------------------------|---------------------------------|-------------|-------------------|---------------------|----------------|-------------------|---------------------|
| 393       | 1.61E-01                      | 0.56                            | 11.86       | 3.54E-02          | 5.63                | NA             | NA                | NA                  |
| 480       | 1.61E-01                      | 0.46                            | 20.06       | 5.61E-02          | 8.68                | NA             | NA                | NA                  |
| 332       | 1.66E-01                      | 2.31                            | 14.64       | 1.07E-03          | Inf                 | RFX1_02        | 9.15E-07          | 28.48               |
| 166       | 1.75E-01                      | 1.70                            | 3.02        | 1.39E-02          | 5.54                | TATA_01        | 9.57E-07          | 13.51               |
| 512       | 1.82E-01                      | 1.49                            | 23.02       | 2.96E-02          | 3.29                | ELK1_02        | 1.24E-04          | 6.15                |
| 372       | 1.82E-01                      | 0.43                            | 5.23        | 8.34E-02          | 9.28                | MEIS1AHOXA9_01 | 5.50E-05          | 14.66               |
| 276       | 1.88E-01                      | 2.08                            | 0.10        | 1.23E-02          | 13.11               | NA             | NA                | NA                  |
| 408       | 1.88E-01                      | 2.08                            | 15.26       | 2.60E-02          | 9.99                | MYCMAX_B       | 1.99E-04          | 18.15               |
| 501       | 1.88E-01                      | 2.08                            | 12.84       | 1.69E-01          | 3.73                | CREB_01        | 5.78E-04          | 14.89               |
| 179       | 1.89E-01                      | 0.50                            | 20.88       | 6.84E-02          | 6.72                | YY1_Q6         | 7.16E-07          | 8.47                |
| 310       | 1.89E-01                      | 0.50                            | 12.26       | 1.12E-01          | 4.92                | TBX5_01        | 6.54E-07          | 17.59               |
| 119       | 1.90E-01                      | 2.49                            | 13.34       | 7.31E-03          | Inf                 | NA             | NA                | NA                  |
| 28        | 1.90E-01                      | 2.49                            | 9.84        | 1.07E-01          | 13.08               | NFKAPPAB50_01  | 7.58E-04          | 25.45               |
| 222       | 1.94E-01                      | 0.00                            | 4.10        | 2.20E-01          | Inf                 | NA             | NA                | NA                  |
| 209       | 1.96E-01                      | 1.66                            | 17.76       | 4.89E-06          | 35.66               | ZTA_Q2         | 9.10E-04          | 10.48               |
| 321       | 2.05E-01                      | 0.38                            | 17.64       | 4.30E-02          | Inf                 | OCT1_02        | 5.41E-04          | 12.87               |
| 421       | 2.05E-01                      | 0.38                            | 9.84        | 7.30E-02          | 26.09               | YY1_Q6         | 6.97E-04          | 8.94                |
| 93        | 2.05E-01                      | 0.38                            | 9.84        | 7.30E-02          | 26.09               | SP1_Q6_01      | 4.16E-04          | 9.72                |
| 97        | 2.05E-01                      | 0.38                            | 20.88       | 1.73E-01          | 10.08               | NA             | NA                | NA                  |
| 163       | 2.05E-01                      | 0.36                            | 6.89        | 1.86E-01          | 9.23                | NFY_Q6_01      | 7.26E-05          | 9.04                |
| 240       | 2.10E-01                      | 0.35                            | 18.67       | 3.02E-01          | 5.09                | NA             | NA                | NA                  |
| 346       | 2.13E-01                      | 0.55                            | 7.68        | 5.46E-02          | 7.15                | E2F1_Q4_01     | 3.70E-09          | 12.47               |
| 362       | 2.13E-01                      | 0.55                            | 6.89        | 1.11E-01          | 4.62                | PAX4_03        | 2.31E-04          | 7.89                |
| 530       | 2.16E-01                      | 1.89                            | 20.88       | 6.56E-03          | 15.10               | NA             | NA                | NA                  |
| 180       | 2.16E-01                      | 0.54                            | 3.10        | 3.26E-04          | Inf                 | NRF1_Q6        | 1.29E-04          | 5.50                |
| 474       | 2.17E-01                      | 0.49                            | 0.26        | 4.79E-02          | 9.28                | EN1_01         | 7.51E-07          | 24.23               |
| 442       | 2.22E-01                      | 0.65                            | 0.77        | 5.97E-04          | 8.47                | NA             | NA                | NA                  |
| 108       | 2.24E-01                      | 0.26                            | 8.09        | 5.71E-02          | Inf                 | NA             | NA                | NA                  |
| 19        | 2.24E-01                      | 0.26                            | 5.88        | 1.43E-01          | Inf                 | NA             | NA                | NA                  |
| 293       | 2.24E-01                      | 0.26                            | 21.84       | 1.09E-01          | Inf                 | NA             | NA                | NA                  |
| 286       | 2.28E-01                      | 0.24                            | 13.34       | 1.94E-01          | Inf                 | NFY_01         | 7.34E-05          | 9.56                |
| 242       | 2.35E-01                      | 1.52                            | 12.02       | 4.22E-04          | 10.21               | NA             | NA                | NA                  |

**Table S8: Enrichment of co-expressed genes in circadian genes, circadian phase, and TF binding sites.**

| ClusterID | Circadian Gene Enrich p value | Circadian Gene Enrich Odd Ratio | Enriched Pk | PK Enrich p value | Pk Enrich Odd Ratio | Matrix AC  | TF Enrich p value | TF Enrich Odd Ratio |
|-----------|-------------------------------|---------------------------------|-------------|-------------------|---------------------|------------|-------------------|---------------------|
| 414       | 2.41E-01                      | 2.37                            | 13.27       | 1.64E-01          | 4.31                | NA         | NA                | NA                  |
| 448       | 2.41E-01                      | 2.37                            | 9.84        | 1.41E-01          | 8.74                | NA         | NA                | NA                  |
| 355       | 2.50E-01                      | 0.53                            | 20.88       | 6.84E-02          | 6.72                | OCT1_07    | 1.84E-05          | 13.64               |
| 403       | 2.50E-01                      | 0.46                            | 20.52       | 2.54E-02          | 19.12               | NA         | NA                | NA                  |
| 464       | 2.50E-01                      | 0.46                            | 17.47       | 1.21E-01          | 7.25                | NA         | NA                | NA                  |
| 214       | 2.51E-01                      | 2.77                            | 9.84        | 7.30E-02          | 26.09               | NA         | NA                | NA                  |
| 397       | 2.51E-01                      | 2.77                            | 20.88       | 1.73E-01          | 10.08               | NA         | NA                | NA                  |
| 503       | 2.51E-01                      | 2.77                            | 19.85       | 1.16E-02          | Inf                 | NA         | NA                | NA                  |
| 497       | 2.53E-01                      | 0.44                            | 10.58       | 7.95E-03          | 36.54               | E2F_01     | 3.70E-04          | 9.48                |
| 136       | 2.65E-01                      | 2.08                            | 12.55       | 9.34E-02          | 6.31                | NA         | NA                | NA                  |
| 350       | 2.74E-01                      | 0.59                            | 23.09       | 1.10E-02          | 9.32                | CREBATF_Q6 | 7.26E-04          | 5.39                |
| 298       | 2.77E-01                      | 0.64                            | 0.10        | 7.21E-03          | 6.56                | E2F4DP2_01 | 1.49E-08          | 8.43                |
| 92        | 2.82E-01                      | 1.50                            | 5.59        | 7.04E-03          | 6.73                | OCT1_07    | 4.42E-04          | 9.19                |
| 165       | 2.90E-01                      | 0.39                            | 13.44       | 4.02E-02          | Inf                 | NA         | NA                | NA                  |
| 229       | 2.90E-01                      | 0.39                            | 18.05       | 3.64E-02          | Inf                 | PAX4_02    | 7.97E-04          | 11.30               |
| 520       | 2.90E-01                      | 0.39                            | 10.90       | 1.11E-01          | 16.62               | NA         | NA                | NA                  |
| 339       | 2.94E-01                      | 1.39                            | 12.43       | 4.03E-03          | 5.68                | NA         | NA                | NA                  |
| 506       | 2.95E-01                      | 1.54                            | 22.75       | 5.54E-02          | 3.66                | NA         | NA                | NA                  |
| 329       | 2.95E-01                      | 1.85                            | 20.88       | 4.37E-02          | 10.08               | YY1_Q6     | 6.71E-04          | 14.29               |
| 32        | 2.95E-01                      | 1.85                            | 15.55       | 7.59E-02          | 7.38                | MAF_Q6     | 7.10E-04          | 22.58               |
| 344       | 2.97E-01                      | 1.71                            | 21.26       | 2.25E-03          | 12.85               | NA         | NA                | NA                  |
| 354       | 3.00E-01                      | 0.62                            | 4.97        | 7.99E-06          | Inf                 | E2F4DP1_01 | 2.03E-17          | 25.69               |
| 418       | 3.08E-01                      | 1.62                            | 15.05       | 2.02E-02          | 6.56                | NA         | NA                | NA                  |
| 314       | 3.15E-01                      | 1.35                            | 16.58       | 6.33E-06          | 16.82               | E2F4DP1_01 | 8.07E-04          | 6.13                |
| 88        | 3.22E-01                      | 0.59                            | 9.84        | 1.73E-01          | 6.56                | NA         | NA                | NA                  |
| 388       | 3.24E-01                      | 0.64                            | 18.94       | 9.87E-02          | 3.53                | WHN_B      | 3.85E-04          | 8.95                |
| 290       | 3.26E-01                      | 0.56                            | 23.54       | 6.29E-02          | 5.79                | HIC1_03    | 1.24E-04          | 9.15                |
| 197       | 3.30E-01                      | 0.30                            | 22.51       | 1.39E-01          | Inf                 | CAAT_01    | 3.88E-08          | 30.63               |
| 232       | 3.30E-01                      | 0.30                            | 9.26        | 3.97E-02          | Inf                 | RSRFC4_Q2  | 1.11E-04          | 21.72               |
| 366       | 3.30E-01                      | 0.30                            | 6.34        | 1.17E-01          | Inf                 | MSX1_01    | 1.80E-05          | 37.67               |
| 29        | 3.30E-01                      | 0.32                            | 12.34       | 1.26E-01          | Inf                 | NA         | NA                | NA                  |
| 151       | 3.30E-01                      | 2.08                            | 7.85        | 1.19E-01          | 15.36               | NA         | NA                | NA                  |

**Table S8: Enrichment of co-expressed genes in circadian genes, circadian phase, and TF binding sites.**

| ClusterID | Circadian Gene Enrich p value | Circadian Gene Enrich Odd Ratio | Enriched Pk | PK Enrich p value | Pk Enrich Odd Ratio | Matrix AC   | TF Enrich p value | TF Enrich Odd Ratio |
|-----------|-------------------------------|---------------------------------|-------------|-------------------|---------------------|-------------|-------------------|---------------------|
| 400       | 3.30E-01                      | 2.08                            | 4.44        | 3.93E-02          | Inf                 | NA          | NA                | NA                  |
| 80        | 3.30E-01                      | 2.08                            | 20.88       | 1.73E-01          | 10.08               | NA          | NA                | NA                  |
| 158       | 3.38E-01                      | 0.28                            | 18.43       | 1.75E-01          | Inf                 | OCT4_01     | 3.31E-04          | 30.53               |
| 273       | 3.38E-01                      | 0.28                            | 4.80        | 1.95E-01          | Inf                 | NA          | NA                | NA                  |
| 10        | 3.39E-01                      | 0.52                            | 9.84        | 1.07E-01          | 13.08               | NA          | NA                | NA                  |
| 381       | 3.39E-01                      | 0.52                            | 5.64        | 6.58E-02          | 10.81               | ZNF219_01   | 5.26E-04          | 12.97               |
| 156       | 3.44E-01                      | 0.48                            | 10.90       | 9.49E-03          | 33.17               | ZF5_B       | 4.62E-05          | 12.22               |
| 422       | 3.44E-01                      | 0.48                            | 15.94       | 1.94E-01          | 5.09                | NA          | NA                | NA                  |
| 510       | 3.44E-01                      | 0.48                            | 21.10       | 8.37E-04          | Inf                 | NA          | NA                | NA                  |
| 515       | 3.44E-01                      | 0.48                            | 13.90       | 1.33E-01          | 6.77                | NA          | NA                | NA                  |
| 215       | 3.51E-01                      | 4.15                            | 20.18       | 9.86E-02          | Inf                 | NA          | NA                | NA                  |
| 216       | 3.51E-01                      | 4.15                            | 6.72        | 1.02E-01          | Inf                 | NA          | NA                | NA                  |
| 46        | 3.51E-01                      | 4.15                            | 17.69       | 2.06E-01          | Inf                 | NA          | NA                | NA                  |
| 99        | 3.51E-01                      | 4.15                            | 5.88        | 1.43E-01          | Inf                 | NA          | NA                | NA                  |
| 473       | 3.51E-01                      | 0.64                            | 11.35       | 6.42E-02          | 6.49                | PR_02       | 7.32E-09          | 19.83               |
| 499       | 3.54E-01                      | 0.61                            | 19.85       | 1.29E-01          | 4.18                | CEBP_Q3     | 4.47E-05          | 10.76               |
| 195       | 3.64E-01                      | 1.45                            | 2.76        | 3.06E-05          | Inf                 | ATF6_01     | 2.30E-04          | 10.55               |
| 243       | 3.64E-01                      | 1.45                            | 3.82        | 2.04E-02          | 5.51                | HSF2_01     | 1.13E-10          | 35.41               |
| 342       | 3.71E-01                      | 1.60                            | 23.86       | 1.05E-02          | 13.82               | NA          | NA                | NA                  |
| 62        | 3.71E-01                      | 1.60                            | 9.77        | 5.35E-04          | 38.41               | HNF4_DR1_Q3 | 3.94E-04          | 14.79               |
| 360       | 3.78E-01                      | 0.64                            | 11.18       | 6.95E-02          | 5.90                | NA          | NA                | NA                  |
| 477       | 3.79E-01                      | 0.71                            | 23.02       | 9.98E-02          | 2.82                | S8_01       | 2.75E-04          | 6.21                |
| 322       | 3.79E-01                      | 1.39                            | 23.86       | 2.41E-03          | 10.37               | MEF2_Q6_01  | 2.03E-04          | 10.65               |
| 76        | 3.83E-01                      | 0.55                            | 7.75        | 2.18E-02          | 15.04               | IRF7_01     | 2.59E-05          | 18.55               |
| 487       | 3.89E-01                      | 1.44                            | 13.44       | 8.67E-02          | 3.20                | NA          | NA                | NA                  |
| 513       | 3.89E-01                      | 1.44                            | 1.06        | 1.60E-02          | 5.33                | NA          | NA                | NA                  |
| 148       | 3.90E-01                      | 2.08                            | 21.22       | 2.48E-02          | 19.40               | NA          | NA                | NA                  |
| 364       | 3.90E-01                      | 2.08                            | 14.59       | 1.59E-01          | 5.93                | NA          | NA                | NA                  |
| 59        | 3.90E-01                      | 2.08                            | 14.59       | 1.59E-01          | 5.93                | GABP_B      | 3.01E-05          | 37.33               |
| 18        | 3.95E-01                      | 1.48                            | 8.59        | 2.04E-02          | 13.59               | NA          | NA                | NA                  |
| 371       | 4.01E-01                      | 0.46                            | 20.88       | 1.73E-01          | 10.08               | CP2_01      | 1.18E-04          | 20.87               |
| 380       | 4.01E-01                      | 0.46                            | 9.84        | 7.30E-02          | 26.09               | NA          | NA                | NA                  |

**Table S8: Enrichment of co-expressed genes in circadian genes, circadian phase, and TF binding sites.**

| ClusterID | Circadian Gene Enrich p value | Circadian Gene Enrich Odd Ratio | Enriched Pk | PK Enrich p value | Pk Enrich Odd Ratio | Matrix AC  | TF Enrich p value | TF Enrich Odd Ratio |
|-----------|-------------------------------|---------------------------------|-------------|-------------------|---------------------|------------|-------------------|---------------------|
| 116       | 4.05E-01                      | 0.44                            | 5.88        | 2.06E-02          | Inf                 | NA         | NA                | NA                  |
| 410       | 4.14E-01                      | 1.56                            | 16.85       | 4.13E-02          | 5.81                | NA         | NA                | NA                  |
| 472       | 4.16E-01                      | 0.61                            | 0.26        | 9.80E-02          | 4.64                | HNF4_01    | 1.14E-12          | 44.50               |
| 145       | 4.20E-01                      | 1.78                            | 18.67       | 7.24E-02          | 10.18               | NA         | NA                | NA                  |
| 416       | 4.20E-01                      | 1.78                            | 2.14        | 1.96E-01          | 5.04                | NA         | NA                | NA                  |
| 524       | 4.20E-01                      | 1.78                            | 7.18        | 1.89E-02          | 22.69               | NA         | NA                | NA                  |
| 122       | 4.23E-01                      | 0.83                            | 15.89       | 3.14E-04          | 4.28                | NRSF_Q4    | 4.65E-10          | 6.73                |
| 129       | 4.28E-01                      | 1.47                            | 14.18       | 3.32E-02          | 6.32                | NA         | NA                | NA                  |
| 250       | 4.28E-01                      | 1.47                            | 21.77       | 1.89E-02          | 8.45                | NA         | NA                | NA                  |
| 7         | 4.28E-01                      | 1.47                            | 3.48        | 3.63E-02          | 6.11                | SP1_Q4_01  | 3.68E-04          | 10.21               |
| 505       | 4.43E-01                      | 0.67                            | 17.26       | 2.81E-02          | 6.72                | NA         | NA                | NA                  |
| 476       | 4.44E-01                      | 0.65                            | 20.88       | 9.65E-02          | 5.05                | CEBPA_01   | 9.14E-04          | 10.75               |
| 91        | 4.44E-01                      | 0.65                            | 3.65        | 3.32E-02          | 6.32                | NA         | NA                | NA                  |
| 308       | 4.48E-01                      | 1.34                            | 17.18       | 2.45E-02          | 3.98                | ARNT_01    | 1.02E-17          | 28.49               |
| 347       | 4.48E-01                      | 1.34                            | 1.18        | 2.82E-04          | 11.96               | PAX4_02    | 3.41E-05          | 8.89                |
| 363       | 4.54E-01                      | 0.57                            | 17.76       | 1.06E-01          | 7.93                | NA         | NA                | NA                  |
| 389       | 4.56E-01                      | 0.54                            | 12.77       | 5.87E-02          | 11.62               | NA         | NA                | NA                  |
| 425       | 4.56E-01                      | 1.56                            | 18.05       | 9.52E-02          | 8.51                | NA         | NA                | NA                  |
| 427       | 4.56E-01                      | 1.56                            | 18.96       | 3.05E-03          | Inf                 | NA         | NA                | NA                  |
| 95        | 4.62E-01                      | 1.45                            | 4.85        | 2.78E-02          | 5.72                | SMAD_Q6_01 | 4.19E-04          | 13.40               |
| 383       | 4.62E-01                      | 1.27                            | 11.76       | 1.42E-02          | 5.68                | ATF_01     | 3.70E-04          | 5.99                |
| 34        | 4.77E-01                      | 2.08                            | 23.86       | 2.25E-01          | Inf                 | NA         | NA                | NA                  |
| 37        | 4.77E-01                      | 2.08                            | 13.51       | 2.10E-01          | Inf                 | NA         | NA                | NA                  |
| 534       | 4.77E-01                      | 1.28                            | 3.89        | 8.45E-03          | 4.77                | HNF4_Q6_01 | 5.48E-12          | 17.67               |
| 2         | 4.82E-01                      | 0.38                            | 11.42       | 7.44E-02          | Inf                 | HNF3B_01   | 3.05E-04          | 32.87               |
| 367       | 4.82E-01                      | 0.38                            | 7.51        | 6.95E-02          | Inf                 | PAX4_03    | 8.85E-04          | 21.61               |
| 39        | 4.84E-01                      | 1.25                            | 5.88        | 3.81E-03          | 5.99                | EGR1_01    | 6.81E-04          | 8.03                |
| 490       | 4.84E-01                      | 1.25                            | 13.18       | 2.53E-03          | 6.18                | NA         | NA                | NA                  |
| 154       | 4.84E-01                      | 0.35                            | 11.54       | 8.00E-02          | Inf                 | NA         | NA                | NA                  |
| 301       | 4.84E-01                      | 0.35                            | 12.89       | 1.53E-01          | Inf                 | AHR_Q5     | 2.10E-04          | 37.42               |
| 441       | 4.84E-01                      | 0.35                            | 19.92       | 1.07E-01          | Inf                 | FXR_Q3     | 4.69E-04          | 27.00               |
| 446       | 4.84E-01                      | 0.35                            | 8.52        | 4.90E-02          | Inf                 | HFH4_01    | 2.00E-04          | 40.61               |

**Table S8: Enrichment of co-expressed genes in circadian genes, circadian phase, and TF binding sites.**

| ClusterID | Circadian Gene Enrich p value | Circadian Gene Enrich Odd Ratio | Enriched Pk | PK Enrich p value | Pk Enrich Odd Ratio | Matrix AC | TF Enrich p value | TF Enrich Odd Ratio |
|-----------|-------------------------------|---------------------------------|-------------|-------------------|---------------------|-----------|-------------------|---------------------|
| 90        | 4.84E-01                      | 0.35                            | 4.22        | 2.15E-01          | Inf                 | RBPJK_01  | 5.61E-04          | 25.37               |
| 378       | 4.91E-01                      | 0.74                            | 20.26       | 4.79E-03          | 9.24                | ZF5_B     | 6.24E-07          | 8.44                |
| 320       | 4.95E-01                      | 0.64                            | 5.88        | 1.01E-01          | 5.99                | NA        | NA                | NA                  |
| 392       | 4.95E-01                      | 1.66                            | 12.77       | 1.14E-02          | 17.43               | SF1_Q6_01 | 3.75E-07          | 33.35               |
| 128       | 4.96E-01                      | 0.61                            | 20.88       | 4.37E-02          | 10.08               | NA        | NA                | NA                  |
| 239       | 5.00E-01                      | 0.59                            | 10.85       | 1.75E-02          | 17.01               | NA        | NA                | NA                  |
| 52        | 5.11E-01                      | 1.51                            | 9.05        | 1.52E-01          | 8.03                | NA        | NA                | NA                  |
| 68        | 5.11E-01                      | 1.51                            | 17.98       | 2.54E-02          | 12.41               | NA        | NA                | NA                  |
| 435       | 5.32E-01                      | 1.38                            | 0.77        | 4.75E-03          | Inf                 | NA        | NA                | NA                  |
| 202       | 5.36E-01                      | 1.29                            | 20.18       | 5.17E-02          | 4.59                | PAX4_04   | 2.79E-04          | 9.86                |
| 146       | 5.53E-01                      | 0.55                            | 8.52        | 9.56E-02          | 19.54               | NA        | NA                | NA                  |
| 16        | 5.53E-01                      | 0.55                            | 19.13       | 2.59E-01          | 6.21                | NA        | NA                | NA                  |
| 394       | 5.53E-01                      | 0.55                            | 20.88       | 1.73E-01          | 10.08               | NA        | NA                | NA                  |
| 432       | 5.53E-01                      | 0.55                            | 20.88       | 8.25E-03          | Inf                 | NA        | NA                | NA                  |
| 522       | 5.53E-01                      | 0.55                            | 1.44        | 7.98E-02          | Inf                 | HNF1_01   | 4.48E-05          | 33.59               |
| 164       | 5.54E-01                      | 0.52                            | 20.88       | 1.73E-01          | 10.08               | LXR_Q3    | 1.34E-04          | 19.47               |
| 299       | 5.54E-01                      | 0.52                            | 18.43       | 3.19E-01          | 4.73                | YY1_Q6    | 1.03E-05          | 18.41               |
| 312       | 5.54E-01                      | 0.71                            | 3.60        | 1.56E-01          | 3.15                | EFC_Q6    | 4.14E-04          | 9.07                |
| 254       | 5.59E-01                      | 0.49                            | 14.42       | 6.11E-02          | Inf                 | NA        | NA                | NA                  |
| 449       | 5.59E-01                      | 0.49                            | 20.06       | 1.08E-02          | Inf                 | NA        | NA                | NA                  |
| 261       | 5.78E-01                      | 1.38                            | 21.43       | 9.86E-02          | Inf                 | NA        | NA                | NA                  |
| 281       | 5.78E-01                      | 1.38                            | 4.22        | 2.15E-01          | Inf                 | NA        | NA                | NA                  |
| 356       | 5.78E-01                      | 1.38                            | 4.80        | 1.95E-01          | Inf                 | NA        | NA                | NA                  |
| 377       | 5.78E-01                      | 1.38                            | 21.60       | 1.00E-01          | Inf                 | NA        | NA                | NA                  |
| 73        | 5.78E-01                      | 1.38                            | 7.34        | 7.44E-02          | Inf                 | NA        | NA                | NA                  |
| 369       | 5.79E-01                      | 0.73                            | 7.51        | 8.06E-02          | 5.39                | NA        | NA                | NA                  |
| 330       | 5.83E-01                      | 1.30                            | 15.10       | 2.38E-02          | 10.34               | NA        | NA                | NA                  |
| 486       | 5.87E-01                      | 1.20                            | 7.01        | 7.12E-02          | 3.79                | NA        | NA                | NA                  |
| 51        | 5.87E-01                      | 1.20                            | 4.22        | 3.19E-03          | 6.39                | CREB_01   | 4.30E-04          | 5.12                |
| 265       | 5.94E-01                      | 1.17                            | 23.35       | 9.81E-03          | 5.05                | NFMUE1_Q6 | 2.64E-05          | 6.79                |
| 25        | 6.28E-01                      | 1.66                            | 17.14       | 5.75E-02          | Inf                 | NA        | NA                | NA                  |
| 411       | 6.33E-01                      | 1.19                            | 13.51       | 2.05E-02          | 7.52                | NA        | NA                | NA                  |



**Table S8: Enrichment of co-expressed genes in circadian genes, circadian phase, and TF binding sites.**

| ClusterID | Circadian Gene Enrich p value | Circadian Gene Enrich Odd Ratio | Enriched Pk | PK Enrich p value | Pk Enrich Odd Ratio | Matrix AC  | TF Enrich p value | TF Enrich Odd Ratio |
|-----------|-------------------------------|---------------------------------|-------------|-------------------|---------------------|------------|-------------------|---------------------|
| 79        | 6.33E-01                      | 1.19                            | 17.02       | 1.66E-01          | 3.05                | AMEF2_Q6   | 1.54E-04          | 18.27               |
| 1         | 6.50E-01                      | 1.21                            | 13.18       | 3.32E-03          | 11.04               | SRF_Q4     | 3.79E-07          | 20.09               |
| 211       | 6.57E-01                      | 1.38                            | 18.65       | 2.83E-02          | Inf                 | FOXP1_01   | 2.67E-04          | 47.99               |
| 404       | 6.57E-01                      | 1.38                            | 16.46       | 7.29E-02          | Inf                 | NA         | NA                | NA                  |
| 451       | 6.57E-01                      | 1.38                            | 20.18       | 9.78E-03          | Inf                 | NA         | NA                | NA                  |
| 45        | 6.57E-01                      | 1.38                            | 13.75       | 5.03E-02          | Inf                 | NA         | NA                | NA                  |
| 483       | 6.57E-01                      | 1.38                            | 12.43       | 1.74E-02          | Inf                 | NA         | NA                | NA                  |
| 488       | 6.57E-01                      | 1.38                            | 20.88       | 1.73E-01          | 10.08               | NA         | NA                | NA                  |
| 6         | 6.57E-01                      | 1.38                            | 5.54        | 2.49E-02          | Inf                 | NA         | NA                | NA                  |
| 526       | 6.59E-01                      | 1.16                            | 6.72        | 2.77E-02          | 6.60                | HNF4_Q6_01 | 7.58E-05          | 10.41               |
| 86        | 6.73E-01                      | 1.19                            | 8.59        | 3.17E-04          | 20.35               | HIF1_Q5    | 2.02E-04          | 17.18               |
| 189       | 6.89E-01                      | 1.19                            | 8.30        | 1.05E-01          | 17.63               | CREBP1_01  | 8.78E-07          | 58.32               |
| 237       | 6.89E-01                      | 1.19                            | 17.47       | 4.70E-02          | Inf                 | NA         | NA                | NA                  |
| 402       | 6.89E-01                      | 1.19                            | 22.92       | 2.73E-02          | Inf                 | SP1_Q2_01  | 2.99E-04          | 46.13               |
| 493       | 6.89E-01                      | 1.19                            | 4.97        | 3.45E-02          | Inf                 | E2F1_Q3_01 | 1.37E-05          | 51.24               |
| 4         | 6.89E-01                      | 1.19                            | 7.97        | 1.14E-01          | 16.06               | NA         | NA                | NA                  |
| 133       | 6.98E-01                      | 0.46                            | 18.55       | 1.73E-01          | Inf                 | MSX1_01    | 2.81E-04          | 33.82               |
| 194       | 6.98E-01                      | 0.46                            | 8.64        | 4.59E-02          | Inf                 | SRF_Q5_01  | 1.23E-04          | 62.90               |
| 266       | 6.98E-01                      | 0.46                            | 13.18       | 1.85E-01          | Inf                 | NA         | NA                | NA                  |
| 279       | 6.98E-01                      | 0.46                            | 8.69        | 4.40E-02          | Inf                 | CETS168_Q6 | 5.71E-04          | 25.21               |
| 306       | 6.98E-01                      | 0.46                            | 4.44        | 1.98E-01          | Inf                 | NA         | NA                | NA                  |
| 461       | 6.98E-01                      | 0.46                            | 20.88       | 9.06E-02          | Inf                 | NA         | NA                | NA                  |
| 516       | 7.03E-01                      | 0.81                            | 16.85       | 7.69E-02          | 3.88                | NA         | NA                | NA                  |
| 253       | 7.03E-01                      | 0.41                            | 19.44       | 1.21E-01          | Inf                 | NA         | NA                | NA                  |
| 368       | 7.03E-01                      | 0.41                            | 13.51       | 2.10E-01          | Inf                 | POU1F1_Q6  | 7.97E-06          | 49.09               |
| 374       | 7.03E-01                      | 0.41                            | 11.35       | 7.20E-02          | Inf                 | NA         | NA                | NA                  |
| 395       | 7.03E-01                      | 0.41                            | 5.35        | 1.69E-01          | Inf                 | NA         | NA                | NA                  |
| 405       | 7.03E-01                      | 0.41                            | 12.02       | 1.05E-01          | Inf                 | NA         | NA                | NA                  |
| 413       | 7.08E-01                      | 0.89                            | 19.13       | 9.46E-02          | 2.39                | ATF_B      | 5.42E-04          | 3.91                |
| 107       | 7.08E-01                      | 1.15                            | 10.27       | 6.95E-02          | 5.49                | NA         | NA                | NA                  |
| 207       | 7.13E-01                      | 1.38                            | 13.51       | 1.14E-01          | 7.52                | NA         | NA                | NA                  |
| 287       | 7.13E-01                      | 1.38                            | 15.10       | 1.90E-01          | 5.17                | NA         | NA                | NA                  |

**Table S8: Enrichment of co-expressed genes in circadian genes, circadian phase, and TF binding sites.**

| ClusterID | Circadian Gene Enrich p value | Circadian Gene Enrich Odd Ratio | Enriched Pk | PK Enrich p value | Pk Enrich Odd Ratio | Matrix AC | TF Enrich p value | TF Enrich Odd Ratio |
|-----------|-------------------------------|---------------------------------|-------------|-------------------|---------------------|-----------|-------------------|---------------------|
| 325       | 7.13E-01                      | 1.38                            | 9.50        | 1.13E-01          | 12.43               | NA        | NA                | NA                  |
| 63        | 7.13E-01                      | 1.38                            | 9.84        | 1.07E-01          | 13.08               | NA        | NA                | NA                  |
| 143       | 7.26E-01                      | 1.25                            | 20.88       | 2.48E-01          | 5.05                | USF_02    | 2.27E-05          | 20.80               |
| 147       | 7.26E-01                      | 1.25                            | 9.26        | 1.14E-01          | 12.23               | NA        | NA                | NA                  |
| 205       | 7.26E-01                      | 1.25                            | 19.44       | 4.05E-02          | 14.56               | NA        | NA                | NA                  |
| 244       | 7.26E-01                      | 1.25                            | 18.34       | 8.45E-02          | 9.21                | NA        | NA                | NA                  |
| 49        | 7.26E-01                      | 1.25                            | 19.22       | 4.96E-02          | 12.88               | NA        | NA                | NA                  |
| 500       | 7.26E-01                      | 1.25                            | 10.34       | 6.04E-03          | 42.37               | NA        | NA                | NA                  |
| 502       | 7.26E-01                      | 1.25                            | 17.98       | 9.92E-02          | 8.28                | NA        | NA                | NA                  |
| 142       | 7.43E-01                      | 1.13                            | 16.92       | 1.59E-01          | 5.93                | NA        | NA                | NA                  |
| 176       | 7.43E-01                      | 1.13                            | 5.02        | 8.73E-02          | 9.02                | NA        | NA                | NA                  |
| 523       | 7.43E-01                      | 1.13                            | 7.27        | 4.77E-04          | Inf                 | NA        | NA                | NA                  |
| 66        | 7.43E-01                      | 1.13                            | 5.88        | 2.98E-03          | Inf                 | NA        | NA                | NA                  |
| 130       | 7.50E-01                      | 0.64                            | 14.42       | 6.11E-02          | Inf                 | NA        | NA                | NA                  |
| 27        | 7.50E-01                      | 0.64                            | 3.94        | 5.08E-02          | Inf                 | SRF_01    | 6.32E-08          | 55.81               |
| 294       | 7.50E-01                      | 0.64                            | 3.05        | 7.00E-02          | Inf                 | NA        | NA                | NA                  |
| 409       | 7.50E-01                      | 0.64                            | 11.71       | 1.66E-01          | 10.56               | NA        | NA                | NA                  |
| 415       | 7.50E-01                      | 0.64                            | 20.88       | 1.73E-01          | 10.08               | NA        | NA                | NA                  |
| 485       | 7.51E-01                      | 1.08                            | 23.59       | 8.30E-02          | 0.00                | CREB_Q2   | 6.72E-05          | 5.91                |
| 153       | 7.52E-01                      | 0.59                            | 12.67       | 2.10E-02          | Inf                 | NA        | NA                | NA                  |
| 313       | 7.53E-01                      | 0.84                            | 2.42        | 1.48E-02          | 4.51                | NA        | NA                | NA                  |
| 297       | 7.57E-01                      | 1.28                            | 13.10       | 1.82E-02          | 14.35               | NA        | NA                | NA                  |
| 391       | 7.57E-01                      | 1.28                            | 17.88       | 1.78E-01          | 4.06                | NA        | NA                | NA                  |
| 390       | 7.65E-01                      | 1.19                            | 16.01       | 6.99E-02          | 7.70                | NA        | NA                | NA                  |
| 11        | 7.76E-01                      | 1.11                            | 12.72       | 1.03E-01          | 5.93                | NA        | NA                | NA                  |
| 178       | 7.76E-01                      | 1.11                            | 3.10        | 4.70E-03          | Inf                 | SF1_Q6_01 | 4.42E-04          | 14.10               |
| 412       | 7.76E-01                      | 1.11                            | 18.96       | 1.03E-01          | 5.93                | NA        | NA                | NA                  |
| 131       | 7.82E-01                      | 0.73                            | 3.94        | 1.29E-01          | 6.89                | NA        | NA                | NA                  |
| 13        | 7.82E-01                      | 0.73                            | 7.01        | 2.32E-02          | 20.13               | CEBPB_01  | 3.70E-05          | 27.79               |
| 271       | 7.82E-01                      | 0.73                            | 23.86       | 1.14E-02          | Inf                 | NFMUE1_Q6 | 2.08E-04          | 11.95               |
| 96        | 7.82E-01                      | 0.73                            | 18.96       | 5.68E-02          | 11.86               | PEBP_Q6   | 9.32E-06          | 23.46               |
| 436       | 7.83E-01                      | 0.69                            | 13.51       | 1.14E-01          | 7.52                | NRF2_01   | 6.36E-04          | 12.97               |

**Table S8: Enrichment of co-expressed genes in circadian genes, circadian phase, and TF binding sites.**

| ClusterID | Circadian Gene Enrich p value | Circadian Gene Enrich Odd Ratio | Enriched Pk | PK Enrich p value | Pk Enrich Odd Ratio | Matrix AC  | TF Enrich p value | TF Enrich Odd Ratio |
|-----------|-------------------------------|---------------------------------|-------------|-------------------|---------------------|------------|-------------------|---------------------|
| 126       | 7.86E-01                      | 0.65                            | 17.02       | 1.54E-01          | 6.09                | NA         | NA                | NA                  |
| 272       | 7.92E-01                      | 1.15                            | 20.93       | 6.93E-02          | 6.67                | NA         | NA                | NA                  |
| 345       | 7.92E-01                      | 1.15                            | 12.60       | 1.52E-01          | 4.02                | NA         | NA                | NA                  |
| 245       | 8.04E-01                      | 0.79                            | 9.84        | 1.41E-01          | 8.74                | NA         | NA                | NA                  |
| 105       | 8.05E-01                      | 0.75                            | 14.02       | 3.03E-03          | Inf                 | AREB6_01   | 3.07E-05          | 12.66               |
| 396       | 8.11E-01                      | 1.13                            | 12.34       | 3.12E-03          | 13.91               | NFKB_C     | 7.44E-04          | 22.97               |
| 514       | 8.11E-01                      | 1.13                            | 3.50        | 2.19E-04          | Inf                 | ATF4_Q2    | 1.35E-04          | 12.27               |
| 8         | 8.21E-01                      | 0.83                            | 20.26       | 7.89E-02          | 6.16                | NA         | NA                | NA                  |
| 496       | 8.21E-01                      | 0.80                            | 12.60       | 2.34E-02          | 9.03                | NA         | NA                | NA                  |
| 527       | 8.21E-01                      | 0.93                            | 5.35        | 2.32E-05          | 6.39                | HNF4_01    | 2.69E-08          | 7.16                |
| 270       | 8.35E-01                      | 0.80                            | 11.76       | 9.88E-02          | 4.97                | NA         | NA                | NA                  |
| 384       | 8.37E-01                      | 1.11                            | 5.98        | 8.33E-02          | 3.83                | NA         | NA                | NA                  |
| 161       | 8.49E-01                      | 1.07                            | 11.69       | 4.65E-03          | 8.72                | MTF1_Q4    | 2.67E-05          | 9.52                |
| 9         | 8.52E-01                      | 1.04                            | 12.34       | 9.41E-02          | 3.48                | SREBP1_Q6  | 8.73E-04          | 7.60                |
| 311       | 8.53E-01                      | 0.87                            | 18.10       | 9.50E-04          | 12.82               | USF_01     | 2.26E-15          | 23.32               |
| 508       | 8.55E-01                      | 1.09                            | 18.34       | 2.10E-02          | 4.61                | STRA13_01  | 7.15E-10          | 13.24               |
| 535       | 8.59E-01                      | 1.04                            | 11.02       | 1.88E-02          | 6.82                | HNF4_Q6_01 | 1.79E-07          | 11.21               |
| 498       | 8.69E-01                      | 1.06                            | 19.34       | 1.20E-02          | 4.97                | YY1_Q6_02  | 2.15E-05          | 5.60                |
| 196       | 8.77E-01                      | 0.91                            | 0.89        | 9.83E-02          | 2.72                | SRF_01     | 1.41E-04          | 7.05                |
| 100       | 1.00E+00                      | 0.69                            | 8.88        | 4.34E-02          | Inf                 | NA         | NA                | NA                  |
| 103       | 1.00E+00                      | 0.59                            | 6.48        | 1.13E-01          | Inf                 | NA         | NA                | NA                  |
| 118       | 1.00E+00                      | 0.69                            | 9.84        | 7.30E-02          | 26.09               | NA         | NA                | NA                  |
| 120       | 1.00E+00                      | 0.83                            | 18.77       | 1.57E-01          | Inf                 | NA         | NA                | NA                  |
| 124       | 1.00E+00                      | 0.59                            | 4.85        | 1.89E-01          | Inf                 | TATA_01    | 9.02E-04          | 23.92               |
| 125       | 1.00E+00                      | 1.04                            | 17.47       | 4.70E-02          | Inf                 | IPF1_Q4_01 | 2.08E-04          | 40.06               |
| 127       | 1.00E+00                      | 0.94                            | 18.17       | 2.45E-02          | 4.40                | NRSE_B     | 1.31E-10          | 15.42               |
| 132       | 1.00E+00                      | 0.92                            | 20.88       | 1.73E-01          | 10.08               | NA         | NA                | NA                  |
| 135       | 1.00E+00                      | 0.59                            | 11.18       | 6.39E-02          | Inf                 | NA         | NA                | NA                  |
| 138       | 1.00E+00                      | 1.04                            | 6.14        | 1.64E-02          | Inf                 | NA         | NA                | NA                  |
| 139       | 1.00E+00                      | 1.04                            | 13.44       | 2.00E-01          | Inf                 | NA         | NA                | NA                  |
| 141       | 1.00E+00                      | 0.78                            | 10.44       | 1.43E-01          | 9.53                | NA         | NA                | NA                  |
| 149       | 1.00E+00                      | 0.75                            | 21.34       | 1.84E-01          | 9.37                | NA         | NA                | NA                  |

**Table S8: Enrichment of co-expressed genes in circadian genes, circadian phase, and TF binding sites.**

| ClusterID | Circadian Gene Enrich p value | Circadian Gene Enrich Odd Ratio | Enriched Pk | PK Enrich p value | Pk Enrich Odd Ratio | Matrix AC   | TF Enrich p value | TF Enrich Odd Ratio |
|-----------|-------------------------------|---------------------------------|-------------|-------------------|---------------------|-------------|-------------------|---------------------|
| 14        | 1.00E+00                      | 0.90                            | 19.63       | 1.22E-02          | 11.82               | PAX9_B      | 5.79E-04          | 12.52               |
| 155       | 1.00E+00                      | 0.94                            | 23.35       | 1.38E-01          | 0.00                | NA          | NA                | NA                  |
| 175       | 1.00E+00                      | 1.00                            | 3.38        | 6.13E-03          | 4.76                | CREBP1_01   | 4.54E-04          | 5.71                |
| 185       | 1.00E+00                      | 0.83                            | 8.47        | 2.62E-03          | Inf                 | E4F1_Q6     | 5.61E-05          | 29.43               |
| 187       | 1.00E+00                      | 0.59                            | 8.64        | 4.59E-02          | Inf                 | NA          | NA                | NA                  |
| 188       | 1.00E+00                      | 1.04                            | 22.44       | 1.38E-01          | Inf                 | NA          | NA                | NA                  |
| 190       | 1.00E+00                      | 0.83                            | 6.60        | 1.07E-01          | Inf                 | NA          | NA                | NA                  |
| 192       | 1.00E+00                      | 0.83                            | 17.64       | 2.07E-01          | Inf                 | NA          | NA                | NA                  |
| 198       | 1.00E+00                      | 1.00                            | 20.09       | 1.17E-01          | 4.47                | HSF1_Q6     | 6.61E-04          | 8.27                |
| 199       | 1.00E+00                      | 1.04                            | 20.26       | 1.11E-01          | 4.62                | NA          | NA                | NA                  |
| 203       | 1.00E+00                      | 0.92                            | 22.18       | 2.34E-01          | 7.04                | NA          | NA                | NA                  |
| 208       | 1.00E+00                      | 0.99                            | 15.22       | 1.02E-03          | 10.24               | HSF_Q6      | 7.43E-04          | 6.17                |
| 210       | 1.00E+00                      | 0.83                            | 13.34       | 1.94E-01          | Inf                 | NA          | NA                | NA                  |
| 212       | 1.00E+00                      | 0.83                            | 12.17       | 1.15E-01          | Inf                 | NA          | NA                | NA                  |
| 225       | 1.00E+00                      | 0.75                            | 17.14       | 5.75E-02          | Inf                 | NA          | NA                | NA                  |
| 228       | 1.00E+00                      | 0.92                            | 0.38        | 6.20E-02          | Inf                 | CETS1P54_01 | 5.57E-04          | 26.63               |
| 22        | 1.00E+00                      | 0.52                            | 20.88       | 9.06E-02          | Inf                 | NA          | NA                | NA                  |
| 233       | 1.00E+00                      | 0.83                            | 23.09       | 1.77E-01          | Inf                 | NA          | NA                | NA                  |
| 234       | 1.00E+00                      | 0.69                            | 7.80        | 1.20E-01          | 15.20               | NA          | NA                | NA                  |
| 248       | 1.00E+00                      | 0.83                            | 20.86       | 1.76E-01          | 9.86                | CDC5_01     | 3.48E-04          | 29.99               |
| 24        | 1.00E+00                      | 0.78                            | 17.35       | 1.28E-01          | 6.96                | NA          | NA                | NA                  |
| 252       | 1.00E+00                      | 1.04                            | 19.13       | 1.94E-02          | Inf                 | NA          | NA                | NA                  |
| 255       | 1.00E+00                      | 0.83                            | 11.76       | 9.18E-02          | Inf                 | NA          | NA                | NA                  |
| 256       | 1.00E+00                      | 0.83                            | 18.72       | 1.63E-01          | Inf                 | NA          | NA                | NA                  |
| 259       | 1.00E+00                      | 0.59                            | 11.93       | 1.00E-01          | Inf                 | NA          | NA                | NA                  |
| 260       | 1.00E+00                      | 0.83                            | 13.01       | 1.66E-01          | Inf                 | NA          | NA                | NA                  |
| 262       | 1.00E+00                      | 0.69                            | 13.44       | 2.00E-01          | Inf                 | NA          | NA                | NA                  |
| 269       | 1.00E+00                      | 0.83                            | 11.86       | 9.42E-03          | Inf                 | NA          | NA                | NA                  |
| 277       | 1.00E+00                      | 0.69                            | 20.88       | 9.06E-02          | Inf                 | NA          | NA                | NA                  |
| 278       | 1.00E+00                      | 0.59                            | 22.75       | 1.54E-01          | Inf                 | NA          | NA                | NA                  |
| 288       | 1.00E+00                      | 1.04                            | 5.71        | 6.20E-02          | 11.23               | NA          | NA                | NA                  |
| 295       | 1.00E+00                      | 0.87                            | 13.10       | 1.41E-01          | 4.79                | YY1_Q6      | 2.33E-08          | 21.53               |

**Table S8: Enrichment of co-expressed genes in circadian genes, circadian phase, and TF binding sites.**

| ClusterID | Circadian Gene Enrich p value | Circadian Gene Enrich Odd Ratio | Enriched Pk | PK Enrich p value | Pk Enrich Odd Ratio | Matrix AC      | TF Enrich p value | TF Enrich Odd Ratio |
|-----------|-------------------------------|---------------------------------|-------------|-------------------|---------------------|----------------|-------------------|---------------------|
| 302       | 1.00E+00                      | 0.69                            | 6.14        | 1.28E-01          | Inf                 | NA             | NA                | NA                  |
| 303       | 1.00E+00                      | 0.83                            | 19.68       | 1.11E-01          | Inf                 | NA             | NA                | NA                  |
| 304       | 1.00E+00                      | 0.83                            | 20.88       | 9.06E-02          | Inf                 | NA             | NA                | NA                  |
| 315       | 1.00E+00                      | 0.69                            | 20.88       | 9.06E-02          | Inf                 | NA             | NA                | NA                  |
| 317       | 1.00E+00                      | 0.59                            | 18.34       | 1.79E-01          | Inf                 | NA             | NA                | NA                  |
| 31        | 1.00E+00                      | 0.69                            | 9.84        | 3.72E-02          | Inf                 | NA             | NA                | NA                  |
| 328       | 1.00E+00                      | 0.59                            | 5.47        | 1.61E-01          | Inf                 | NA             | NA                | NA                  |
| 331       | 1.00E+00                      | 0.75                            | 19.85       | 2.03E-01          | 8.34                | NA             | NA                | NA                  |
| 333       | 1.00E+00                      | 1.04                            | 9.84        | 1.07E-01          | 13.08               | NA             | NA                | NA                  |
| 336       | 1.00E+00                      | 0.83                            | 4.97        | 1.85E-01          | Inf                 | NA             | NA                | NA                  |
| 337       | 1.00E+00                      | 0.69                            | 13.01       | 1.66E-01          | Inf                 | NA             | NA                | NA                  |
| 343       | 1.00E+00                      | 0.92                            | 16.34       | 5.66E-03          | Inf                 | NA             | NA                | NA                  |
| 351       | 1.00E+00                      | 0.94                            | 11.52       | 5.24E-02          | 7.90                | NA             | NA                | NA                  |
| 365       | 1.00E+00                      | 0.69                            | 11.42       | 7.44E-02          | Inf                 | NA             | NA                | NA                  |
| 36        | 1.00E+00                      | 0.69                            | 13.18       | 1.85E-01          | Inf                 | MEIS1BHOXA9_02 | 1.48E-04          | 49.66               |
| 370       | 1.00E+00                      | 0.89                            | 7.01        | 2.32E-02          | 20.13               | NA             | NA                | NA                  |
| 382       | 1.00E+00                      | 0.69                            | 12.89       | 1.53E-01          | Inf                 | NA             | NA                | NA                  |
| 399       | 1.00E+00                      | 0.59                            | 5.98        | 1.36E-01          | Inf                 | GR_Q6          | 4.82E-04          | 26.76               |
| 406       | 1.00E+00                      | 1.04                            | 12.94       | 1.59E-01          | Inf                 | NA             | NA                | NA                  |
| 40        | 1.00E+00                      | 1.04                            | 7.18        | 8.13E-02          | Inf                 | NA             | NA                | NA                  |
| 41        | 1.00E+00                      | 0.69                            | 19.92       | 1.07E-01          | Inf                 | NA             | NA                | NA                  |
| 423       | 1.00E+00                      | 0.89                            | 19.13       | 5.27E-02          | 12.41               | ZID_01         | 5.17E-04          | 13.51               |
| 424       | 1.00E+00                      | 0.59                            | 12.60       | 1.43E-01          | Inf                 | NA             | NA                | NA                  |
| 429       | 1.00E+00                      | 1.04                            | 10.80       | 5.40E-02          | Inf                 | NA             | NA                | NA                  |
| 42        | 1.00E+00                      | 0.59                            | 18.77       | 1.57E-01          | Inf                 | NA             | NA                | NA                  |
| 431       | 1.00E+00                      | 1.01                            | 12.55       | 3.51E-03          | 4.91                | NRF2_01        | 3.66E-04          | 5.11                |
| 433       | 1.00E+00                      | 0.59                            | 13.18       | 1.85E-01          | Inf                 | NA             | NA                | NA                  |
| 434       | 1.00E+00                      | 0.83                            | 23.42       | 1.03E-01          | 8.09                | NA             | NA                | NA                  |
| 439       | 1.00E+00                      | 0.52                            | 12.94       | 1.59E-01          | Inf                 | ELK1_02        | 6.39E-04          | 29.80               |
| 43        | 1.00E+00                      | 1.04                            | 12.34       | 2.36E-01          | 6.96                | CETS168_Q6     | 5.71E-04          | 25.21               |
| 447       | 1.00E+00                      | 0.59                            | 18.10       | 1.90E-01          | Inf                 | NA             | NA                | NA                  |
| 450       | 1.00E+00                      | 1.04                            | 3.72        | 5.45E-02          | Inf                 | PAX5_02        | 6.36E-20          | 176.08              |

**Table S8: Enrichment of co-expressed genes in circadian genes, circadian phase, and TF binding sites.**

| ClusterID | Circadian Gene Enrich p value | Circadian Gene Enrich Odd Ratio | Enriched Pk | PK Enrich p value | Pk Enrich Odd Ratio | Matrix AC  | TF Enrich p value | TF Enrich Odd Ratio |
|-----------|-------------------------------|---------------------------------|-------------|-------------------|---------------------|------------|-------------------|---------------------|
| 452       | 1.00E+00                      | 0.59                            | 4.34        | 2.03E-01          | Inf                 | NA         | NA                | NA                  |
| 458       | 1.00E+00                      | 0.52                            | 8.69        | 4.40E-02          | Inf                 | NA         | NA                | NA                  |
| 463       | 1.00E+00                      | 0.83                            | 8.69        | 1.65E-01          | 7.32                | OCT1_01    | 4.65E-06          | 19.87               |
| 465       | 1.00E+00                      | 0.83                            | 19.51       | 1.15E-01          | Inf                 | NA         | NA                | NA                  |
| 469       | 1.00E+00                      | 1.04                            | 13.44       | 2.00E-01          | Inf                 | NA         | NA                | NA                  |
| 478       | 1.00E+00                      | 1.02                            | 5.35        | 1.49E-03          | 6.88                | MYC MAX_01 | 5.85E-04          | 6.50                |
| 47        | 1.00E+00                      | 0.83                            | 23.69       | 2.15E-01          | Inf                 | NA         | NA                | NA                  |
| 481       | 1.00E+00                      | 1.04                            | 17.02       | 4.50E-03          | 15.21               | E2F_01     | 8.72E-05          | 13.62               |
| 482       | 1.00E+00                      | 1.00                            | 17.26       | 8.90E-03          | 8.40                | NA         | NA                | NA                  |
| 489       | 1.00E+00                      | 0.59                            | 18.65       | 1.68E-01          | Inf                 | NA         | NA                | NA                  |
| 495       | 1.00E+00                      | 0.52                            | 18.43       | 1.75E-01          | Inf                 | OCT4_01    | 8.05E-06          | 48.96               |
| 55        | 1.00E+00                      | 1.04                            | 7.13        | 1.64E-01          | 10.72               | NA         | NA                | NA                  |
| 57        | 1.00E+00                      | 1.04                            | 20.86       | 1.76E-01          | 9.86                | NA         | NA                | NA                  |
| 58        | 1.00E+00                      | 1.04                            | 18.67       | 1.64E-01          | Inf                 | NA         | NA                | NA                  |
| 61        | 1.00E+00                      | 0.52                            | 5.23        | 1.77E-01          | Inf                 | NA         | NA                | NA                  |
| 65        | 1.00E+00                      | 0.59                            | 9.84        | 3.72E-02          | Inf                 | NA         | NA                | NA                  |
| 67        | 1.00E+00                      | 0.83                            | 17.69       | 1.10E-01          | 7.72                | ICSBP_Q6   | 4.74E-04          | 14.69               |
| 69        | 1.00E+00                      | 0.69                            | 18.10       | 3.61E-02          | Inf                 | NRF2_01    | 2.25E-04          | 18.54               |
| 72        | 1.00E+00                      | 1.04                            | 9.84        | 7.30E-02          | 26.09               | IRF7_01    | 2.05E-04          | 44.36               |

**clusterID:** ID of the cluster

**circadian gene enrich p value:** Enrichment p value of circadian gene in the cluster

**circadian gene enrich odd ratio:** Enrichment odd ratios of circadian genes

**enriched pk** Enriched peak time

**PK enrich p value:** Enrichment p value of peak time

**PK enrich odd ratio:** Enrichment odd ratios of peak time

**matrix ac:** TRANSFAC TF matrix accession number

**TF enrich p value:** Enrichment p value of TF binding sites in the cluster

**TF enrich odd ratio:** Enrichment odd ratios of TF binding sites in the cluster
