# Supplementary material for: Analysis of a Gene Regulatory Cascade Mediating Circadian Rhythm in Zebrafish
Source: PubMed Central journal article supplement (PMC3585402; doi:10.1371/journal.pcbi.1002940), 2013-02-28
Supplement: pcbi.1002940.s014.pdf [file pcbi.1002940.s014.pdf]

**Table S9: Up/Down regulated genes of mitfa KD.**

| Gene ID | Gene Symbol      | Pvalue   | diff_KO_WT | UP/Down Regulated |
|---------|------------------|----------|------------|-------------------|
| 30188   | ccne             | 3.00E-02 | -0.52      | Up Regulated      |
| 30228   | pes              | 1.31E-02 | -1.06      | Up Regulated      |
| 30260   | flh              | 2.26E-02 | -0.51      | Up Regulated      |
| 30289   | her3             | 1.00E-02 | -1.02      | Up Regulated      |
| 30300   | her2             | 2.74E-02 | -0.97      | Up Regulated      |
| 30304   | oep              | 2.57E-02 | -0.59      | Up Regulated      |
| 30354   | lpl              | 2.12E-02 | -0.57      | Up Regulated      |
| 30449   | hsp47            | 7.37E-05 | -0.58      | Up Regulated      |
| 30476   | wif1             | 9.22E-04 | -0.52      | Up Regulated      |
| 30483   | gata4            | 3.74E-04 | -0.66      | Up Regulated      |
| 30590   | tp53             | 1.39E-02 | -2.39      | Up Regulated      |
| 30632   | bmp2b            | 1.52E-02 | -0.52      | Up Regulated      |
| 30637   | mdm2             | 3.64E-03 | -2.08      | Up Regulated      |
| 30649   | psme3            | 2.04E-02 | -0.53      | Up Regulated      |
| 30710   | igf2a            | 2.71E-02 | -0.88      | Up Regulated      |
| 57933   | caspa            | 9.78E-03 | -0.53      | Up Regulated      |
| 58013   | noc2l            | 3.99E-03 | -0.74      | Up Regulated      |
| 58022   | casp8            | 7.20E-03 | -2.18      | Up Regulated      |
| 58039   | dazl             | 1.48E-02 | -0.60      | Up Regulated      |
| 58081   | baxa             | 1.69E-03 | -0.58      | Up Regulated      |
| 58097   | myf5             | 1.50E-02 | -0.87      | Up Regulated      |
| 60658   | nos1             | 2.32E-02 | -1.26      | Up Regulated      |
| 64692   | zp3b             | 7.37E-03 | -0.83      | Up Regulated      |
| 114404  | cx44.2           | 1.92E-02 | -0.54      | Up Regulated      |
| 118437  | gpc4             | 3.89E-03 | -0.51      | Up Regulated      |
| 140423  | jag1b            | 3.74E-03 | -0.59      | Up Regulated      |
| 171473  | ccng1            | 7.18E-03 | -1.47      | Up Regulated      |
| 171480  | crabp2a          | 1.26E-02 | -0.58      | Up Regulated      |
| 192312  | mak16            | 2.96E-03 | -0.78      | Up Regulated      |
| 252845  | mpp5a            | 6.66E-03 | -0.68      | Up Regulated      |
| 252851  | mycn             | 2.06E-02 | -0.61      | Up Regulated      |
| 266985  | npm1             | 1.87E-03 | -0.97      | Up Regulated      |
| 266987  | cbsb             | 1.37E-02 | -0.60      | Up Regulated      |
| 266990  | pwp2h            | 3.89E-03 | -0.65      | Up Regulated      |
| 282678  | timm9            | 1.86E-02 | -0.59      | Up Regulated      |
| 286745  | ddx55            | 5.01E-04 | -0.66      | Up Regulated      |
| 286746  | sdad1            | 1.22E-03 | -0.84      | Up Regulated      |
| 286778  | c1orf109         | 1.61E-03 | -0.51      | Up Regulated      |
| 317638  | igfbp1a          | 1.13E-02 | -0.82      | Up Regulated      |
| 317639  | tsr2             | 4.87E-03 | -0.74      | Up Regulated      |
| 317644  | mki67ip          | 1.42E-03 | -0.71      | Up Regulated      |
| 317739  | ppan             | 6.42E-04 | -0.61      | Up Regulated      |
| 321058  | wdr3             | 2.73E-03 | -0.68      | Up Regulated      |
| 321114  | nhp2l1           | 1.04E-02 | -0.54      | Up Regulated      |
| 321127  | ddx18            | 1.40E-02 | -0.63      | Up Regulated      |
| 321130  | si:dkey-91i17.1  | 2.28E-02 | -0.86      | Up Regulated      |
| 321133  | nop14            | 1.92E-02 | -0.53      | Up Regulated      |
| 321183  | si:dkey-236e20.6 | 1.34E-02 | -0.50      | Up Regulated      |
| 321277  | mybbp1a          | 2.81E-03 | -0.78      | Up Regulated      |
| 321289  | noc3l            | 1.56E-02 | -0.66      | Up Regulated      |
| 321442  | nppa             | 2.50E-02 | -0.62      | Up Regulated      |
| 321504  | ssb              | 3.99E-03 | -0.51      | Up Regulated      |
| 321652  | wdr12            | 3.24E-03 | -0.79      | Up Regulated      |
| 321700  | zgc:109901       | 8.44E-03 | -0.67      | Up Regulated      |
| 321720  | nt5c3            | 6.18E-03 | -0.64      | Up Regulated      |

**Table S9: Up/Down regulated genes of mitfa KD.**

| Gene ID | Gene Symbol     | Pvalue   | diff_KO_WT | UP/Down Regulated |
|---------|-----------------|----------|------------|-------------------|
| 321745  | wdr36           | 1.93E-03 | -0.69      | Up Regulated      |
| 321875  | rchy1           | 1.52E-04 | -0.50      | Up Regulated      |
| 321892  | ckmt1           | 7.03E-04 | -1.16      | Up Regulated      |
| 321897  | gnl3            | 7.20E-04 | -0.66      | Up Regulated      |
| 321974  | prmt1           | 9.90E-03 | -0.55      | Up Regulated      |
| 321985  | wu:fb40b03      | 2.01E-02 | -0.61      | Up Regulated      |
| 322229  | adkb            | 2.95E-02 | -0.53      | Up Regulated      |
| 322251  | rpl711          | 2.66E-04 | -0.59      | Up Regulated      |
| 322660  | upb1            | 1.72E-04 | -1.07      | Up Regulated      |
| 322739  | wu:fb72c11      | 7.49E-03 | -0.53      | Up Regulated      |
| 323016  | exosc8          | 1.07E-03 | -0.73      | Up Regulated      |
| 323052  | zgc:165515      | 1.05E-02 | -0.53      | Up Regulated      |
| 323355  | drg2            | 7.80E-04 | -0.53      | Up Regulated      |
| 323424  | sult1st1        | 2.82E-03 | -0.71      | Up Regulated      |
| 323426  | mphosph10       | 4.13E-03 | -0.74      | Up Regulated      |
| 323462  | pa2g4b          | 1.65E-03 | -0.54      | Up Regulated      |
| 323465  | vcanb           | 2.07E-02 | -0.62      | Up Regulated      |
| 323961  | wu:fc15e02      | 1.06E-02 | -0.52      | Up Regulated      |
| 324052  | c1galt1c1       | 1.18E-02 | -0.62      | Up Regulated      |
| 324079  | adi1            | 4.97E-03 | -0.57      | Up Regulated      |
| 324148  | wu:fc20c04      | 4.02E-03 | -0.52      | Up Regulated      |
| 324212  | si:ch73-73d17.3 | 2.31E-02 | -0.54      | Up Regulated      |
| 324303  | slc39a6         | 1.80E-02 | -0.55      | Up Regulated      |
| 324319  | wu:fc25e04      | 3.80E-03 | -0.54      | Up Regulated      |
| 324426  | si:ch211-42i9.5 | 1.34E-02 | -0.57      | Up Regulated      |
| 324573  | ogfod1          | 7.29E-05 | -0.52      | Up Regulated      |
| 324944  | magt1           | 6.53E-04 | -0.53      | Up Regulated      |
| 325603  | polr1b          | 8.03E-03 | -0.66      | Up Regulated      |
| 326102  | hhip            | 6.23E-03 | -0.65      | Up Regulated      |
| 326761  | lnpa            | 1.35E-02 | -0.59      | Up Regulated      |
| 326846  | zff9            | 8.97E-04 | -0.59      | Up Regulated      |
| 327053  | rrp15           | 1.40E-02 | -0.53      | Up Regulated      |
| 327057  | uck2b           | 5.55E-03 | -0.52      | Up Regulated      |
| 327078  | polr1a          | 4.95E-03 | -0.61      | Up Regulated      |
| 327082  | napa            | 2.01E-02 | -0.51      | Up Regulated      |
| 327335  | srp72           | 7.07E-03 | -0.62      | Up Regulated      |
| 327377  | tuba4l          | 2.16E-02 | -0.82      | Up Regulated      |
| 327403  | h1m             | 1.20E-02 | -0.64      | Up Regulated      |
| 327494  | zgc:66472       | 4.44E-03 | -0.52      | Up Regulated      |
| 334055  | taf5l           | 2.26E-02 | -0.53      | Up Regulated      |
| 334271  | zgc:171476      | 2.26E-02 | -0.90      | Up Regulated      |
| 334315  | orc3            | 6.22E-04 | -0.73      | Up Regulated      |
| 334393  | iars            | 5.43E-03 | -0.72      | Up Regulated      |
| 334446  | heatr1          | 7.09E-03 | -0.81      | Up Regulated      |
| 334724  | anxa1a          | 2.85E-02 | -0.88      | Up Regulated      |
| 334823  | wu:fa04e07      | 1.62E-02 | -0.50      | Up Regulated      |
| 334936  | trmt2a          | 3.79E-03 | -0.56      | Up Regulated      |
| 335049  | ebna1bp2        | 1.05E-03 | -0.62      | Up Regulated      |
| 335270  | wu:fl03e01      | 1.26E-03 | -0.57      | Up Regulated      |
| 335288  | gpr34a          | 1.61E-02 | -0.60      | Up Regulated      |
| 335411  | si:dkeyp-46h3.2 | 1.69E-02 | -1.04      | Up Regulated      |
| 335495  | parp3           | 4.90E-04 | -1.01      | Up Regulated      |
| 335750  | zgc:77551       | 2.68E-03 | -0.53      | Up Regulated      |
| 336149  | utp11l          | 4.53E-03 | -0.53      | Up Regulated      |
| 336442  | wu:fb10g03      | 7.43E-03 | -0.72      | Up Regulated      |

**Table S9: Up/Down regulated genes of mitfa KD.**

| Gene ID | Gene Symbol       | Pvalue   | diff_KO_WT | UP/Down Regulated |
|---------|-------------------|----------|------------|-------------------|
| 336470  | zgc:56683         | 1.56E-03 | -0.83      | Up Regulated      |
| 336764  | rps15a            | 1.57E-02 | -0.75      | Up Regulated      |
| 336984  | dnajc21           | 2.96E-03 | -0.70      | Up Regulated      |
| 336998  | chek2             | 1.31E-02 | -0.52      | Up Regulated      |
| 337046  | ranbp1            | 1.90E-03 | -0.63      | Up Regulated      |
| 337155  | nap1l4a           | 3.28E-04 | -0.70      | Up Regulated      |
| 337179  | mmp2              | 7.30E-04 | -0.76      | Up Regulated      |
| 337214  | zgc:66430         | 3.82E-03 | -0.84      | Up Regulated      |
| 337399  | rrs1              | 7.46E-03 | -0.51      | Up Regulated      |
| 337461  | zgc:65979         | 4.57E-03 | -0.53      | Up Regulated      |
| 337487  | pus3              | 7.12E-03 | -0.74      | Up Regulated      |
| 338230  | unc119.1          | 2.38E-03 | -0.59      | Up Regulated      |
| 338277  | id:ibd1090        | 5.95E-03 | -0.57      | Up Regulated      |
| 338290  | hmbsb             | 1.91E-02 | -0.71      | Up Regulated      |
| 352916  | sepx1a            | 1.56E-02 | -0.62      | Up Regulated      |
| 353223  | tshb              | 1.28E-03 | -0.82      | Up Regulated      |
| 353313  | foxi1             | 4.18E-03 | -1.27      | Up Regulated      |
| 368201  | ved               | 1.72E-03 | -0.67      | Up Regulated      |
| 368235  | yars              | 2.59E-03 | -0.61      | Up Regulated      |
| 368253  | pinx1             | 1.56E-02 | -0.82      | Up Regulated      |
| 368270  | sult1st3          | 3.49E-03 | -0.65      | Up Regulated      |
| 368478  | wdr75             | 1.22E-03 | -0.72      | Up Regulated      |
| 368631  | pms1              | 6.26E-03 | -0.57      | Up Regulated      |
| 368779  | phlda3            | 6.32E-04 | -2.16      | Up Regulated      |
| 368824  | ccdc65            | 2.29E-02 | -0.90      | Up Regulated      |
| 368856  | cenpn             | 4.18E-03 | -0.59      | Up Regulated      |
| 368857  | si:busm1-241h12.4 | 6.51E-03 | -0.54      | Up Regulated      |
| 368909  | rrm2b             | 7.89E-03 | -2.68      | Up Regulated      |
| 373084  | hig1              | 8.28E-03 | -0.69      | Up Regulated      |
| 373085  | hspa9             | 6.14E-03 | -0.59      | Up Regulated      |
| 378722  | rdh10b            | 1.16E-02 | -0.52      | Up Regulated      |
| 378844  | ddx27             | 9.91E-04 | -0.61      | Up Regulated      |
| 378855  | slmo2             | 1.17E-03 | -0.59      | Up Regulated      |
| 386639  | zcchc9            | 2.30E-03 | -0.55      | Up Regulated      |
| 386642  | ngdn              | 2.73E-04 | -0.71      | Up Regulated      |
| 386850  | eif6              | 1.47E-03 | -0.71      | Up Regulated      |
| 386932  | poc1b             | 5.57E-03 | -0.64      | Up Regulated      |
| 387255  | rbm19             | 3.47E-03 | -0.64      | Up Regulated      |
| 387261  | baiap2l1a         | 7.54E-03 | -0.52      | Up Regulated      |
| 393095  | mocs3             | 1.19E-02 | -0.83      | Up Regulated      |
| 393106  | rad18             | 7.74E-04 | -0.60      | Up Regulated      |
| 393109  | rasl11b           | 2.50E-03 | -0.85      | Up Regulated      |
| 393117  | ccdc94            | 6.07E-04 | -0.52      | Up Regulated      |
| 393143  | umps              | 9.58E-03 | -0.84      | Up Regulated      |
| 393165  | zgc:56116         | 4.72E-04 | -0.56      | Up Regulated      |
| 393173  | zgc:56178         | 1.62E-03 | -0.52      | Up Regulated      |
| 393176  | zgc:56197         | 2.97E-02 | -0.51      | Up Regulated      |
| 393185  | trmt11            | 6.74E-03 | -0.63      | Up Regulated      |
| 393192  | zgc:56288         | 2.31E-02 | -0.61      | Up Regulated      |
| 393206  | nol10             | 1.16E-02 | -0.60      | Up Regulated      |
| 393222  | zgc:55343         | 3.93E-03 | -0.57      | Up Regulated      |
| 393224  | snapc1b           | 1.21E-04 | -0.54      | Up Regulated      |
| 393236  | sybl1             | 3.92E-03 | -0.75      | Up Regulated      |
| 393237  | imp3              | 1.88E-04 | -0.65      | Up Regulated      |
| 393241  | rnaseh2b          | 1.79E-03 | -0.67      | Up Regulated      |

**Table S9: Up/Down regulated genes of mitfa KD.**

| Gene ID | Gene Symbol | Pvalue   | diff_KO_WT | UP/Down Regulated |
|---------|-------------|----------|------------|-------------------|
| 393243  | zgc:56688   | 6.67E-04 | -0.84      | Up Regulated      |
| 393257  | zgc:56407   | 2.57E-04 | -0.55      | Up Regulated      |
| 393260  | zgc:56457   | 2.77E-03 | -0.77      | Up Regulated      |
| 393277  | mrpl45      | 3.31E-04 | -0.54      | Up Regulated      |
| 393308  | minal       | 2.73E-02 | -0.66      | Up Regulated      |
| 393349  | zgc:64116   | 1.44E-03 | -0.78      | Up Regulated      |
| 393370  | pdcd2       | 1.80E-02 | -0.52      | Up Regulated      |
| 393371  | dnajc5gb    | 2.48E-02 | -0.69      | Up Regulated      |
| 393393  | zgc:64213   | 1.47E-03 | -0.70      | Up Regulated      |
| 393397  | lsm14aa     | 2.96E-02 | -0.51      | Up Regulated      |
| 393404  | zgc:63466   | 2.41E-03 | -0.54      | Up Regulated      |
| 393409  | zgc:63572   | 2.28E-02 | -0.51      | Up Regulated      |
| 393429  | tmem206     | 1.63E-03 | -0.55      | Up Regulated      |
| 393482  | tm9sf4      | 5.17E-03 | -0.73      | Up Regulated      |
| 393511  | stc1l       | 1.37E-02 | -0.76      | Up Regulated      |
| 393526  | mtap        | 5.75E-03 | -0.60      | Up Regulated      |
| 393538  | polr1c      | 3.44E-04 | -0.70      | Up Regulated      |
| 393548  | gadd45aa    | 5.10E-04 | -1.21      | Up Regulated      |
| 393596  | wdr46       | 2.43E-02 | -0.51      | Up Regulated      |
| 393604  | srfl        | 2.24E-02 | -0.77      | Up Regulated      |
| 393650  | irf7        | 1.92E-04 | -0.81      | Up Regulated      |
| 393653  | rhoga       | 2.08E-03 | -0.62      | Up Regulated      |
| 393654  | slc5a1      | 2.17E-02 | -1.57      | Up Regulated      |
| 393713  | fhit        | 1.03E-03 | -0.92      | Up Regulated      |
| 393717  | smfn        | 1.23E-04 | -0.54      | Up Regulated      |
| 393744  | zgc:73273   | 1.69E-03 | -0.75      | Up Regulated      |
| 393749  | tfdp1b      | 1.71E-02 | -0.51      | Up Regulated      |
| 393780  | ccdc58      | 2.24E-05 | -0.65      | Up Regulated      |
| 393787  | pcbd1       | 6.14E-04 | -0.50      | Up Regulated      |
| 393813  | pdlim7      | 8.31E-03 | -0.61      | Up Regulated      |
| 393863  | heatr3      | 9.17E-04 | -0.60      | Up Regulated      |
| 393864  | naprt1      | 2.44E-03 | -0.51      | Up Regulated      |
| 393981  | ttc4        | 1.56E-02 | -0.70      | Up Regulated      |
| 393982  | alp         | 3.93E-03 | -0.56      | Up Regulated      |
| 393984  | aacs        | 5.47E-03 | -0.66      | Up Regulated      |
| 394000  | pgm1        | 1.57E-02 | -0.56      | Up Regulated      |
| 394021  | shmt1       | 1.69E-02 | -1.25      | Up Regulated      |
| 394040  | surf6       | 8.66E-03 | -0.67      | Up Regulated      |
| 394064  | zgc:55695   | 1.08E-02 | -0.52      | Up Regulated      |
| 394086  | zgc:66419   | 4.28E-03 | -0.58      | Up Regulated      |
| 394129  | hmbsa       | 1.66E-02 | -0.62      | Up Regulated      |
| 394138  | asns        | 9.56E-03 | -0.83      | Up Regulated      |
| 394145  | vrk2        | 6.05E-04 | -1.70      | Up Regulated      |
| 394150  | oxsr1b      | 3.99E-03 | -0.77      | Up Regulated      |
| 394160  | bokb        | 1.98E-02 | -1.16      | Up Regulated      |
| 394185  | pufa        | 4.85E-04 | -0.73      | Up Regulated      |
| 394188  | qars        | 2.57E-02 | -0.55      | Up Regulated      |
| 394189  | eif3ja      | 1.19E-02 | -0.60      | Up Regulated      |
| 394196  | nop56       | 5.31E-03 | -0.54      | Up Regulated      |
| 402798  | qtrtd1      | 2.41E-03 | -0.66      | Up Regulated      |
| 402800  | kri1l       | 1.24E-02 | -0.53      | Up Regulated      |
| 402802  | zgc:162119  | 1.97E-02 | -0.72      | Up Regulated      |
| 402808  | rrp9        | 4.14E-03 | -0.83      | Up Regulated      |
| 402856  | twistnb     | 2.47E-03 | -0.75      | Up Regulated      |
| 402862  | cdkn1bl     | 2.88E-02 | -0.60      | Up Regulated      |

**Table S9: Up/Down regulated genes of mitfa KD.**

| Gene ID | Gene Symbol     | Pvalue   | diff_KO_WT | UP/Down Regulated |
|---------|-----------------|----------|------------|-------------------|
| 402863  | gtpbp1l         | 5.42E-04 | -1.39      | Up Regulated      |
| 402871  | gstcd           | 1.10E-02 | -0.60      | Up Regulated      |
| 402880  | LOC402880       | 1.05E-02 | -1.46      | Up Regulated      |
| 402937  | mgp             | 4.32E-03 | -0.69      | Up Regulated      |
| 402976  | si:dkey-194e6.1 | 1.13E-03 | -0.72      | Up Regulated      |
| 402995  | pus7            | 1.98E-02 | -0.60      | Up Regulated      |
| 403013  | irf9            | 3.58E-03 | -0.54      | Up Regulated      |
| 404619  | n6amt2          | 3.50E-04 | -0.64      | Up Regulated      |
| 404725  | cx30.3          | 1.74E-02 | -0.56      | Up Regulated      |
| 405787  | fibpl           | 5.73E-03 | -0.64      | Up Regulated      |
| 405812  | cyb5b           | 6.23E-03 | -0.90      | Up Regulated      |
| 405828  | nup43           | 2.53E-03 | -0.63      | Up Regulated      |
| 405867  | zgc:85909       | 8.25E-04 | -0.67      | Up Regulated      |
| 405874  | zgc:85939       | 1.55E-03 | -0.72      | Up Regulated      |
| 406311  | zgc:73230       | 8.94E-03 | -0.54      | Up Regulated      |
| 406342  | zgc:55891       | 2.19E-02 | -1.46      | Up Regulated      |
| 406382  | znf259          | 1.68E-03 | -0.63      | Up Regulated      |
| 406457  | rcc1            | 8.00E-03 | -0.58      | Up Regulated      |
| 406479  | orc5            | 2.79E-04 | -0.88      | Up Regulated      |
| 406486  | m6pr            | 5.37E-03 | -0.57      | Up Regulated      |
| 406571  | cirh1a          | 1.25E-03 | -0.94      | Up Regulated      |
| 406630  | zgc:77499       | 2.16E-02 | -0.63      | Up Regulated      |
| 406633  | tesc            | 1.13E-02 | -0.99      | Up Regulated      |
| 406637  | mre11a          | 3.11E-05 | -0.61      | Up Regulated      |
| 406721  | rad5111         | 3.45E-03 | -0.70      | Up Regulated      |
| 406741  | e2f4            | 2.35E-02 | -0.55      | Up Regulated      |
| 406746  | fpgs            | 1.39E-02 | -0.70      | Up Regulated      |
| 406805  | nvl             | 1.41E-02 | -0.53      | Up Regulated      |
| 406831  | gyg1            | 8.74E-04 | -0.80      | Up Regulated      |
| 406840  | sesn3           | 5.65E-03 | -1.06      | Up Regulated      |
| 407084  | riok2           | 1.37E-02 | -0.54      | Up Regulated      |
| 407612  | tmem106a        | 8.75E-03 | -0.67      | Up Regulated      |
| 407635  | ptpn3           | 1.12E-02 | -0.60      | Up Regulated      |
| 407655  | zfpm1           | 9.52E-03 | -0.50      | Up Regulated      |
| 407673  | rpia            | 1.40E-02 | -0.76      | Up Regulated      |
| 407696  | ddx52           | 1.12E-03 | -0.73      | Up Regulated      |
| 407736  | fabp7b          | 1.72E-03 | -0.89      | Up Regulated      |
| 415150  | EIF2B1          | 7.27E-04 | -0.56      | Up Regulated      |
| 415191  | tnni1al         | 1.25E-03 | -0.79      | Up Regulated      |
| 415200  | zgc:86839       | 4.54E-03 | -0.65      | Up Regulated      |
| 415216  | zgc:86776       | 7.58E-03 | -0.55      | Up Regulated      |
| 415234  | med22           | 1.52E-02 | -0.52      | Up Regulated      |
| 415236  | zgc:86715       | 7.97E-03 | -0.69      | Up Regulated      |
| 415238  | rpp40l          | 5.04E-03 | -0.89      | Up Regulated      |
| 415250  | rpf1            | 3.24E-04 | -0.70      | Up Regulated      |
| 432386  | mgc35261l       | 1.30E-03 | -0.66      | Up Regulated      |
| 436587  | ltv1            | 7.90E-04 | -0.60      | Up Regulated      |
| 436605  | stx5a           | 1.41E-03 | -0.71      | Up Regulated      |
| 436625  | rspo1           | 3.56E-03 | -2.67      | Up Regulated      |
| 436691  | zgc:92670       | 1.93E-03 | -0.57      | Up Regulated      |
| 436758  | zgc:92862       | 4.68E-04 | -0.53      | Up Regulated      |
| 436771  | hccsa           | 8.60E-03 | -0.73      | Up Regulated      |
| 436779  | lyrm1           | 2.81E-04 | -1.59      | Up Regulated      |
| 436787  | dusp22a         | 1.67E-02 | -0.78      | Up Regulated      |
| 436798  | rpp38           | 9.47E-03 | -0.54      | Up Regulated      |

**Table S9: Up/Down regulated genes of mitfa KD.**

| Gene ID | Gene Symbol       | Pvalue   | diff_KO_WT | UP/Down Regulated |
|---------|-------------------|----------|------------|-------------------|
| 436807  | nop16             | 1.48E-03 | -0.62      | Up Regulated      |
| 436808  | rwdd1             | 1.13E-03 | -0.58      | Up Regulated      |
| 436826  | polr3k            | 1.77E-03 | -0.58      | Up Regulated      |
| 436841  | gc                | 2.86E-02 | -0.56      | Up Regulated      |
| 436845  | zgc:92746         | 2.01E-03 | -0.72      | Up Regulated      |
| 436890  | tspan33           | 5.87E-05 | -0.68      | Up Regulated      |
| 436892  | nup37             | 1.55E-02 | -0.55      | Up Regulated      |
| 436936  | jmjd5             | 1.79E-04 | -0.55      | Up Regulated      |
| 437005  | zgc:100799        | 1.24E-02 | -1.10      | Up Regulated      |
| 442932  | gnl3l             | 1.19E-03 | -0.77      | Up Regulated      |
| 445058  | tipin             | 2.74E-03 | -0.80      | Up Regulated      |
| 445082  | dnajc15           | 4.69E-03 | -0.51      | Up Regulated      |
| 445101  | zgc:92006         | 5.16E-03 | -0.50      | Up Regulated      |
| 445104  | zgc:91999         | 2.52E-02 | -0.88      | Up Regulated      |
| 445115  | grwd1             | 8.69E-04 | -0.67      | Up Regulated      |
| 445144  | chchd4            | 3.16E-03 | -0.61      | Up Regulated      |
| 445161  | cenpp             | 5.84E-03 | -0.60      | Up Regulated      |
| 445162  | dimt1l            | 2.57E-02 | -0.51      | Up Regulated      |
| 445166  | ctu2              | 4.88E-03 | -0.52      | Up Regulated      |
| 445173  | zgc:101084        | 9.74E-03 | -0.69      | Up Regulated      |
| 445243  | tim8a             | 1.89E-03 | -0.96      | Up Regulated      |
| 445292  | sgcg              | 1.31E-02 | -0.69      | Up Regulated      |
| 445306  | EIF3HA            | 2.49E-03 | -0.53      | Up Regulated      |
| 445385  | rfc5              | 3.96E-03 | -0.64      | Up Regulated      |
| 445388  | rcl1              | 3.33E-03 | -0.74      | Up Regulated      |
| 445389  | gtf3aa            | 1.32E-04 | -1.29      | Up Regulated      |
| 445390  | mybl2             | 2.31E-02 | -0.86      | Up Regulated      |
| 445394  | wdr55             | 2.02E-03 | -0.70      | Up Regulated      |
| 445399  | ddx56             | 3.86E-03 | -0.61      | Up Regulated      |
| 445406  | ect2              | 2.92E-02 | -0.61      | Up Regulated      |
| 445412  | polr1d            | 3.59E-04 | -0.83      | Up Regulated      |
| 445499  | tnpo2             | 1.21E-02 | -0.60      | Up Regulated      |
| 445567  | st3gal2l          | 2.23E-02 | -0.79      | Up Regulated      |
| 447811  | rassf1            | 1.24E-03 | -0.54      | Up Regulated      |
| 447856  | zgc:92127         | 1.81E-02 | -0.60      | Up Regulated      |
| 447863  | bin1              | 1.09E-02 | -0.51      | Up Regulated      |
| 447868  | zgc:92599         | 1.55E-02 | -0.64      | Up Regulated      |
| 447872  | dsc1              | 9.67E-03 | -0.56      | Up Regulated      |
| 447875  | smyd5             | 1.65E-02 | -0.80      | Up Regulated      |
| 447888  | zgc:101748        | 5.69E-04 | -0.57      | Up Regulated      |
| 447896  | si:ch211-217g15.2 | 1.99E-02 | -0.58      | Up Regulated      |
| 447901  | polr3gla          | 5.45E-03 | -0.89      | Up Regulated      |
| 447909  | tgm2              | 1.45E-03 | -0.56      | Up Regulated      |
| 447914  | cox17             | 8.77E-05 | -0.72      | Up Regulated      |
| 447933  | uxt               | 5.41E-03 | -0.54      | Up Regulated      |
| 449553  | zgc:103672        | 5.31E-03 | -0.61      | Up Regulated      |
| 449670  | srl               | 2.41E-02 | -0.59      | Up Regulated      |
| 449825  | zgc:101560        | 8.68E-03 | -0.57      | Up Regulated      |
| 449833  | zdhhc15a          | 1.49E-02 | -0.65      | Up Regulated      |
| 449857  | si:dkey-145p14.5  | 2.03E-03 | -1.42      | Up Regulated      |
| 449954  | si:ch73-37h15.2   | 1.31E-03 | -0.63      | Up Regulated      |
| 450000  | amt               | 1.83E-02 | -0.51      | Up Regulated      |
| 450020  | cd151             | 5.60E-03 | -0.53      | Up Regulated      |
| 450024  | cited2            | 3.22E-04 | -0.78      | Up Regulated      |
| 450027  | zgc:101814        | 1.80E-03 | -0.52      | Up Regulated      |

**Table S9: Up/Down regulated genes of mitfa KD.**

| Gene ID | Gene Symbol       | Pvalue   | diff_KO_WT | UP/Down Regulated |
|---------|-------------------|----------|------------|-------------------|
| 450030  | zgc:101803        | 2.35E-03 | -0.98      | Up Regulated      |
| 492339  | creg2             | 1.14E-02 | -0.57      | Up Regulated      |
| 492353  | zgc:92172         | 1.44E-02 | -0.55      | Up Regulated      |
| 492478  | slc25a44a         | 2.83E-02 | -0.50      | Up Regulated      |
| 492480  | rnf24             | 1.35E-02 | -0.60      | Up Regulated      |
| 492485  | lrrc20            | 1.34E-02 | -0.54      | Up Regulated      |
| 492514  | dph5              | 1.28E-03 | -0.75      | Up Regulated      |
| 492754  | im:7154516        | 1.61E-02 | -0.58      | Up Regulated      |
| 492761  | tbl3              | 6.87E-03 | -0.55      | Up Regulated      |
| 492784  | zgc:101716        | 4.07E-03 | -0.74      | Up Regulated      |
| 492814  | zgc:101609        | 1.48E-02 | -0.51      | Up Regulated      |
| 493608  | farsb             | 1.62E-02 | -0.56      | Up Regulated      |
| 493915  | atoh1b            | 2.52E-02 | -0.75      | Up Regulated      |
| 494040  | cd2apl            | 2.33E-02 | -0.51      | Up Regulated      |
| 494059  | zgc:103536        | 4.88E-04 | -0.54      | Up Regulated      |
| 494105  | foxj1b            | 3.96E-03 | -0.81      | Up Regulated      |
| 494106  | nsun4             | 4.87E-03 | -0.62      | Up Regulated      |
| 497181  | tomm5             | 3.98E-03 | -0.50      | Up Regulated      |
| 497333  | im:7136639        | 2.30E-02 | -0.58      | Up Regulated      |
| 503593  | mrpl48            | 1.13E-04 | -0.58      | Up Regulated      |
| 503604  | zgc:113138        | 1.03E-02 | -0.60      | Up Regulated      |
| 503606  | zgc:110753        | 1.63E-03 | -0.59      | Up Regulated      |
| 503742  | zgc:113334        | 3.95E-03 | -0.72      | Up Regulated      |
| 503748  | rfc2              | 7.81E-03 | -0.59      | Up Regulated      |
| 503751  | zgc:110848        | 3.53E-03 | -0.77      | Up Regulated      |
| 503752  | ptrh1             | 1.20E-02 | -0.68      | Up Regulated      |
| 503758  | slc25a32b         | 1.61E-03 | -0.57      | Up Regulated      |
| 503762  | zgc:113036        | 4.48E-04 | -0.71      | Up Regulated      |
| 503783  | metap1            | 6.04E-03 | -0.54      | Up Regulated      |
| 541317  | si:ch211-150a22.1 | 2.36E-02 | -0.59      | Up Regulated      |
| 541336  | zgc:112496        | 2.81E-03 | -0.62      | Up Regulated      |
| 541344  | zgc:110343        | 1.96E-02 | -0.89      | Up Regulated      |
| 541352  | rpp30             | 1.46E-03 | -0.73      | Up Regulated      |
| 541404  | cdc42ep2          | 2.27E-02 | -0.66      | Up Regulated      |
| 541413  | slc39a9           | 2.65E-02 | -0.61      | Up Regulated      |
| 541428  | znrd1             | 6.96E-04 | -0.61      | Up Regulated      |
| 541448  | zgc:113346        | 1.79E-02 | -0.92      | Up Regulated      |
| 541489  | acp1              | 2.90E-02 | -0.59      | Up Regulated      |
| 550264  | fcf1              | 2.09E-03 | -0.57      | Up Regulated      |
| 550279  | lypla1            | 2.36E-02 | -0.76      | Up Regulated      |
| 550284  | wdr92             | 2.64E-03 | -0.52      | Up Regulated      |
| 550328  | park2             | 7.65E-03 | -0.54      | Up Regulated      |
| 550343  | si:dkey-22a1.3    | 4.46E-03 | -0.63      | Up Regulated      |
| 550348  | prmt3             | 1.68E-03 | -0.72      | Up Regulated      |
| 550349  | pdss1             | 5.98E-04 | -0.53      | Up Regulated      |
| 550350  | zgc:110388        | 2.52E-03 | -0.85      | Up Regulated      |
| 550358  | zgc:112052        | 2.63E-04 | -0.51      | Up Regulated      |
| 550359  | morn3             | 1.06E-02 | -0.77      | Up Regulated      |
| 550391  | mrpl12            | 5.97E-03 | -0.53      | Up Regulated      |
| 550399  | grem2             | 4.55E-03 | -0.65      | Up Regulated      |
| 550440  | zgc:112104        | 4.44E-03 | -0.51      | Up Regulated      |
| 550455  | mrps18b           | 2.48E-04 | -0.54      | Up Regulated      |
| 550466  | hmgb3b            | 1.30E-04 | -0.51      | Up Regulated      |
| 550481  | rhoub             | 1.60E-02 | -0.94      | Up Regulated      |
| 550514  | utp23             | 7.28E-03 | -0.63      | Up Regulated      |

**Table S9: Up/Down regulated genes of mitfa KD.**

| Gene ID | Gene Symbol      | Pvalue   | diff_KO_WT | UP/Down Regulated |
|---------|------------------|----------|------------|-------------------|
| 550525  | zgc:110197       | 1.14E-02 | -0.58      | Up Regulated      |
| 550549  | EIF4E1C          | 1.19E-02 | -0.53      | Up Regulated      |
| 550559  | dph1             | 9.83E-03 | -0.54      | Up Regulated      |
| 550561  | PPP1R14AA        | 2.29E-03 | -0.56      | Up Regulated      |
| 550569  | MYL10            | 5.63E-04 | -0.85      | Up Regulated      |
| 550570  | ITPR1            | 4.46E-03 | -0.99      | Up Regulated      |
| 550574  | zgc:113106       | 3.29E-03 | -1.14      | Up Regulated      |
| 550579  | zgc:113076       | 4.38E-04 | -0.60      | Up Regulated      |
| 550580  | SQRDL            | 9.29E-04 | -0.72      | Up Regulated      |
| 550612  | zgc:113229       | 2.26E-02 | -1.06      | Up Regulated      |
| 552924  | SLC2A15B         | 2.69E-02 | -0.75      | Up Regulated      |
| 553083  | RBBP9            | 9.29E-04 | -0.50      | Up Regulated      |
| 553297  | CFH              | 2.64E-02 | -1.31      | Up Regulated      |
| 553298  | im:7150454       | 1.24E-03 | -1.03      | Up Regulated      |
| 553325  | PTCD3            | 1.87E-03 | -0.53      | Up Regulated      |
| 553438  | LOC553438        | 2.26E-02 | -0.68      | Up Regulated      |
| 553483  | HAUS7            | 1.27E-02 | -0.51      | Up Regulated      |
| 553492  | LOC553492        | 2.13E-02 | -0.98      | Up Regulated      |
| 553512  | SLC27A1B         | 2.12E-02 | -0.54      | Up Regulated      |
| 553527  | LOC553527        | 4.71E-03 | -0.90      | Up Regulated      |
| 553568  | zgc:109995       | 4.23E-03 | -0.90      | Up Regulated      |
| 553571  | TP53RK           | 6.30E-04 | -0.55      | Up Regulated      |
| 553592  | TATDN3           | 2.35E-02 | -0.54      | Up Regulated      |
| 553606  | NLE1             | 8.66E-03 | -0.80      | Up Regulated      |
| 553616  | NIP7             | 1.64E-03 | -0.88      | Up Regulated      |
| 553622  | PHLDA2           | 4.30E-05 | -1.08      | Up Regulated      |
| 553636  | TRNAU1AP         | 6.98E-03 | -0.58      | Up Regulated      |
| 553655  | PYGMA            | 1.62E-03 | -0.62      | Up Regulated      |
| 553657  | RAB12            | 3.96E-04 | -0.71      | Up Regulated      |
| 553671  | zgc:112030       | 5.41E-03 | -0.53      | Up Regulated      |
| 553673  | zgc:112038       | 1.30E-02 | -0.75      | Up Regulated      |
| 553695  | zgc:112255       | 1.48E-02 | -0.63      | Up Regulated      |
| 553697  | FAM100AB         | 2.49E-02 | -0.65      | Up Regulated      |
| 553698  | zgc:112271       | 4.97E-03 | -0.79      | Up Regulated      |
| 553709  | MRPL27           | 2.55E-02 | -0.57      | Up Regulated      |
| 553720  | zgc:112365       | 1.39E-03 | -0.52      | Up Regulated      |
| 553726  | zgc:112397       | 2.50E-02 | -0.97      | Up Regulated      |
| 553733  | POLR1E           | 8.44E-03 | -0.74      | Up Regulated      |
| 553748  | zgc:113276       | 8.14E-03 | -0.98      | Up Regulated      |
| 553791  | PREP             | 1.75E-02 | -0.68      | Up Regulated      |
| 553795  | zgc:111947       | 2.12E-02 | -0.73      | Up Regulated      |
| 553808  | ANKRD45          | 1.08E-03 | -0.65      | Up Regulated      |
| 554096  | NOC4L            | 2.03E-05 | -0.82      | Up Regulated      |
| 554117  | MORN5            | 2.24E-02 | -0.57      | Up Regulated      |
| 554231  | zgc:109926       | 2.01E-02 | -0.55      | Up Regulated      |
| 555238  | PCGF6            | 1.88E-02 | -0.67      | Up Regulated      |
| 555267  | si:zfos-47c12.1  | 1.83E-02 | -0.88      | Up Regulated      |
| 555328  | zgc:171630       | 6.14E-03 | -0.88      | Up Regulated      |
| 555517  | KAT2A            | 1.30E-02 | -0.52      | Up Regulated      |
| 555570  | si:ch211-218c6.5 | 1.24E-02 | -0.69      | Up Regulated      |
| 555604  | NOX1             | 2.56E-02 | -0.88      | Up Regulated      |
| 555753  | zgc:113389       | 2.59E-02 | -0.55      | Up Regulated      |
| 555804  | wu:fk76c08       | 1.61E-02 | -0.73      | Up Regulated      |
| 555824  | LOC555824        | 2.95E-02 | -0.68      | Up Regulated      |
| 555828  | LOC555828        | 2.71E-02 | -0.90      | Up Regulated      |



**Table S9: Up/Down regulated genes of mitfa KD.**

| Gene ID | Gene Symbol       | Pvalue   | diff_KO_WT | UP/Down Regulated |
|---------|-------------------|----------|------------|-------------------|
| 555835  | si:ch211-225p5.3  | 1.05E-04 | -1.21      | Up Regulated      |
| 555926  | lace1b            | 7.75E-03 | -0.60      | Up Regulated      |
| 555997  | si:ch211-284b7.3  | 2.91E-04 | -0.55      | Up Regulated      |
| 556208  | akap1b            | 1.27E-02 | -0.66      | Up Regulated      |
| 556226  | cdc42l2           | 5.41E-03 | -0.76      | Up Regulated      |
| 556362  | LOC556362         | 6.22E-03 | -0.53      | Up Regulated      |
| 556389  | fxn               | 1.88E-03 | -0.72      | Up Regulated      |
| 556493  | ncapd3            | 5.30E-03 | -0.95      | Up Regulated      |
| 556515  | LOC556515         | 6.32E-03 | -0.50      | Up Regulated      |
| 556702  | wu:fi41d10        | 2.22E-05 | -1.60      | Up Regulated      |
| 556728  | crfb8             | 3.00E-02 | -0.86      | Up Regulated      |
| 557052  | hfm1              | 5.73E-03 | -0.53      | Up Regulated      |
| 557168  | si:dkey-240e12.6  | 4.22E-03 | -0.83      | Up Regulated      |
| 557254  | wu:fc27e05        | 9.59E-03 | -0.65      | Up Regulated      |
| 557725  | zgc:154110        | 1.25E-03 | -0.57      | Up Regulated      |
| 557741  | si:dkey-14d8.6    | 2.60E-02 | -0.50      | Up Regulated      |
| 557849  | im:7159098        | 2.00E-03 | -0.52      | Up Regulated      |
| 557881  | dok7              | 2.75E-02 | -0.53      | Up Regulated      |
| 557892  | LOC557892         | 2.75E-02 | -0.60      | Up Regulated      |
| 558036  | lmx1a             | 2.14E-02 | -0.95      | Up Regulated      |
| 558146  | mfsd4b            | 6.89E-03 | -0.88      | Up Regulated      |
| 558373  | extl2             | 1.84E-02 | -1.03      | Up Regulated      |
| 558421  | si:ch211-173p18.9 | 8.09E-03 | -0.68      | Up Regulated      |
| 558500  | oxnad1            | 2.43E-02 | -0.72      | Up Regulated      |
| 558534  | si:dkey-42i9.5    | 1.21E-03 | -0.78      | Up Regulated      |
| 558677  | zp3a.2            | 2.90E-02 | -1.07      | Up Regulated      |
| 558684  | b4galnt1a         | 2.53E-02 | -0.60      | Up Regulated      |
| 558764  | zgc:101633        | 2.99E-02 | -0.77      | Up Regulated      |
| 558911  | wu:fa99c08        | 9.92E-04 | -0.71      | Up Regulated      |
| 558956  | isg15             | 2.04E-02 | -2.58      | Up Regulated      |
| 559192  | LOC559192         | 8.77E-03 | -0.70      | Up Regulated      |
| 559352  | znf593            | 9.68E-04 | -0.64      | Up Regulated      |
| 559409  | si:ch211-217k17.7 | 4.04E-04 | -0.94      | Up Regulated      |
| 559477  | aatf              | 4.29E-03 | -0.74      | Up Regulated      |
| 559754  | tmprss13a         | 2.68E-02 | -0.64      | Up Regulated      |
| 560202  | ghrb              | 2.93E-02 | -0.52      | Up Regulated      |
| 560402  | zgc:165500        | 2.18E-02 | -0.53      | Up Regulated      |
| 560478  | slc25a26          | 2.28E-03 | -0.65      | Up Regulated      |
| 560620  | hemk1             | 6.83E-03 | -0.56      | Up Regulated      |
| 560648  | si:ch211-81a5.8   | 2.08E-03 | -1.05      | Up Regulated      |
| 560651  | ces3              | 1.15E-03 | -0.54      | Up Regulated      |
| 560729  | ppp6r2            | 1.07E-02 | -0.66      | Up Regulated      |
| 561131  | nolc1             | 2.38E-02 | -0.61      | Up Regulated      |
| 561226  | lnx1              | 7.04E-03 | -2.30      | Up Regulated      |
| 561280  | zfp361a           | 1.04E-02 | -0.62      | Up Regulated      |
| 561301  | zgc:165651        | 4.80E-04 | -0.54      | Up Regulated      |
| 561410  | tat               | 8.01E-04 | -1.29      | Up Regulated      |
| 561824  | LOC561824         | 4.94E-03 | -0.57      | Up Regulated      |
| 561927  | angptl6           | 1.45E-02 | -0.67      | Up Regulated      |
| 562445  | arl8bb            | 4.31E-03 | -0.65      | Up Regulated      |
| 562538  | zgc:162269        | 1.02E-03 | -0.68      | Up Regulated      |
| 562639  | rtn2b             | 2.80E-03 | -0.66      | Up Regulated      |
| 563100  | si:ch211-51h9.6   | 1.50E-03 | -0.56      | Up Regulated      |
| 563195  | rrp12             | 2.27E-03 | -0.73      | Up Regulated      |
| 563247  | LOC563247         | 1.11E-03 | -1.00      | Up Regulated      |

**Table S9: Up/Down regulated genes of mitfa KD.**

| Gene ID | Gene Symbol       | Pvalue   | diff_KO_WT | UP/Down Regulated |
|---------|-------------------|----------|------------|-------------------|
| 563392  | zgc:172056        | 6.09E-03 | -0.56      | Up Regulated      |
| 563398  | zgc:172079        | 8.99E-03 | -0.61      | Up Regulated      |
| 563448  | zgc:193690        | 8.87E-03 | -1.03      | Up Regulated      |
| 563523  | LOC563523         | 7.29E-03 | -0.55      | Up Regulated      |
| 563576  | si:dkey-245p14.4  | 1.35E-02 | -0.50      | Up Regulated      |
| 563675  | slc35e3           | 2.05E-03 | -0.63      | Up Regulated      |
| 563708  | skp2              | 1.19E-02 | -0.81      | Up Regulated      |
| 563867  | si:ch211-237l4.5  | 9.73E-03 | -0.62      | Up Regulated      |
| 564078  | trmt5             | 2.19E-03 | -0.51      | Up Regulated      |
| 564166  | txlnbb            | 2.71E-02 | -0.74      | Up Regulated      |
| 564382  | si:ch211-103i6.5  | 3.66E-04 | -0.64      | Up Regulated      |
| 564693  | tmprss13b         | 2.35E-03 | -0.85      | Up Regulated      |
| 564785  | LOC564785         | 1.26E-02 | -0.60      | Up Regulated      |
| 564815  | slc5a9            | 1.78E-02 | -0.68      | Up Regulated      |
| 564961  | dnttip2           | 2.98E-03 | -0.93      | Up Regulated      |
| 565000  | exosc3            | 3.08E-03 | -0.62      | Up Regulated      |
| 565002  | LOC565002         | 9.44E-03 | -0.78      | Up Regulated      |
| 565038  | ccnd2b            | 2.35E-02 | -0.74      | Up Regulated      |
| 565232  | hspa14            | 2.41E-03 | -0.56      | Up Regulated      |
| 565269  | her8.2            | 4.46E-03 | -0.61      | Up Regulated      |
| 565410  | LOC565410         | 2.95E-02 | -0.77      | Up Regulated      |
| 565437  | si:dkey-221j11.2  | 1.97E-03 | -0.73      | Up Regulated      |
| 565728  | si:dkey-193b15.6  | 2.52E-02 | -1.26      | Up Regulated      |
| 565828  | stk33             | 7.96E-03 | -0.62      | Up Regulated      |
| 566075  | slc4a2a           | 1.92E-02 | -0.92      | Up Regulated      |
| 566173  | LOC566173         | 7.69E-03 | -0.77      | Up Regulated      |
| 566203  | mthfsd            | 5.32E-03 | -0.60      | Up Regulated      |
| 566223  | si:dkey-127j5.5   | 3.07E-03 | -0.63      | Up Regulated      |
| 566423  | si:dkey-27p23.3   | 1.83E-02 | -0.92      | Up Regulated      |
| 566470  | gdf6a             | 4.10E-03 | -0.57      | Up Regulated      |
| 566612  | ca9               | 5.71E-03 | -0.70      | Up Regulated      |
| 566735  | insb              | 1.50E-02 | -0.76      | Up Regulated      |
| 566817  | LOC566817         | 1.30E-02 | -0.66      | Up Regulated      |
| 566876  | wfs1a             | 1.44E-02 | -0.74      | Up Regulated      |
| 566971  | LOC566971         | 6.73E-03 | -0.58      | Up Regulated      |
| 567019  | ptpmt1            | 5.53E-03 | -0.85      | Up Regulated      |
| 567105  | taf1a             | 8.38E-04 | -0.83      | Up Regulated      |
| 567341  | si:ch211-261f7.2  | 8.17E-04 | -0.76      | Up Regulated      |
| 567483  | si:dkey-22a1.2    | 2.35E-02 | -0.91      | Up Regulated      |
| 567594  | LOC567594         | 2.29E-03 | -0.86      | Up Regulated      |
| 567726  | si:ch211-163l21.7 | 7.76E-03 | -0.65      | Up Regulated      |
| 567941  | e2f7              | 2.46E-02 | -0.64      | Up Regulated      |
| 567972  | zgc:123339        | 1.14E-02 | -0.51      | Up Regulated      |
| 568202  | por               | 1.91E-02 | -0.74      | Up Regulated      |
| 568363  | LOC568363         | 1.18E-02 | -0.59      | Up Regulated      |
| 568418  | si:dkeyp-55f12.3  | 6.06E-03 | -0.57      | Up Regulated      |
| 568463  | ryr2b             | 1.30E-02 | -0.59      | Up Regulated      |
| 568593  | sdca4             | 7.84E-03 | -0.59      | Up Regulated      |
| 568741  | eftud1            | 4.76E-03 | -0.76      | Up Regulated      |
| 568757  | si:dkey-121j17.1  | 2.56E-02 | -0.57      | Up Regulated      |
| 568788  | LOC568788         | 2.26E-02 | -0.80      | Up Regulated      |
| 568835  | slc27a6           | 1.31E-02 | -0.54      | Up Regulated      |
| 569076  | si:dkey-181i3.3   | 1.32E-02 | -0.56      | Up Regulated      |
| 569118  | ddx10             | 3.43E-03 | -0.57      | Up Regulated      |
| 569134  | si:ch211-11i5.1   | 6.14E-03 | -0.99      | Up Regulated      |

**Table S9: Up/Down regulated genes of mitfa KD.**

| Gene ID | Gene Symbol       | Pvalue   | diff_KO_WT | UP/Down Regulated |
|---------|-------------------|----------|------------|-------------------|
| 569261  | pkhd11l1          | 1.20E-02 | -0.78      | Up Regulated      |
| 569275  | si:ch211-199o1.5  | 2.14E-02 | -0.63      | Up Regulated      |
| 569381  | LOC569381         | 2.13E-02 | -1.53      | Up Regulated      |
| 569427  | LOC569427         | 1.75E-02 | -1.51      | Up Regulated      |
| 569454  | crfb1             | 4.95E-03 | -1.05      | Up Regulated      |
| 569583  | LOC569583         | 4.47E-03 | -0.69      | Up Regulated      |
| 569841  | mrps18c           | 2.63E-02 | -0.67      | Up Regulated      |
| 569930  | zgc:153896        | 7.04E-03 | -1.62      | Up Regulated      |
| 570158  | alkbh5            | 1.38E-02 | -0.56      | Up Regulated      |
| 570159  | zgc:123271        | 2.20E-02 | -0.80      | Up Regulated      |
| 570267  | LOC570267         | 1.82E-02 | -0.62      | Up Regulated      |
| 570432  | LOC570432         | 6.97E-03 | -1.02      | Up Regulated      |
| 570726  | LOC570726         | 8.97E-03 | -0.56      | Up Regulated      |
| 571152  | si:dkey-258f14.3  | 3.01E-03 | -0.94      | Up Regulated      |
| 571299  | nenf              | 9.63E-03 | -0.53      | Up Regulated      |
| 572027  | ppat              | 1.52E-02 | -0.51      | Up Regulated      |
| 572170  | mrpl9             | 8.89E-04 | -0.66      | Up Regulated      |
| 573266  | dync1li2          | 4.66E-03 | -0.58      | Up Regulated      |
| 573998  | dusp12            | 2.79E-02 | -0.66      | Up Regulated      |
| 574000  | tnnt2d            | 1.23E-02 | -0.71      | Up Regulated      |
| 606657  | trmt2b            | 1.14E-02 | -0.82      | Up Regulated      |
| 613021  | si:ch211-103f16.2 | 6.53E-03 | -0.56      | Up Regulated      |
| 613239  | hcrt              | 1.64E-02 | -0.66      | Up Regulated      |
| 641330  | atg10             | 5.27E-04 | -0.75      | Up Regulated      |
| 641427  | zgc:123272        | 8.34E-03 | -2.28      | Up Regulated      |
| 641570  | impad1            | 1.82E-02 | -0.54      | Up Regulated      |
| 678516  | tnfaip6           | 1.35E-03 | -0.71      | Up Regulated      |
| 678541  | zgc:136861        | 8.72E-03 | -0.69      | Up Regulated      |
| 678588  | zgc:136360        | 5.38E-03 | -0.67      | Up Regulated      |
| 678604  | irf1              | 2.83E-02 | -0.53      | Up Regulated      |
| 678616  | zgc:136403        | 4.55E-03 | -1.26      | Up Regulated      |
| 678634  | zgc:136871        | 8.38E-04 | -1.25      | Up Regulated      |
| 678636  | wbscr27           | 2.04E-02 | -0.61      | Up Regulated      |
| 692250  | fancf             | 1.40E-02 | -0.53      | Up Regulated      |
| 692329  | farsa             | 1.04E-02 | -0.51      | Up Regulated      |
| 724049  | krr1              | 9.13E-03 | -0.53      | Up Regulated      |
| 751632  | exosc5            | 1.30E-04 | -0.66      | Up Regulated      |
| 751646  | zgc:153151        | 1.26E-02 | -1.15      | Up Regulated      |
| 751684  | fbxo36            | 2.87E-02 | -0.88      | Up Regulated      |
| 751714  | zgc:153631        | 2.70E-02 | -0.80      | Up Regulated      |
| 751717  | zgc:153763        | 2.04E-03 | -0.73      | Up Regulated      |
| 751763  | bbc3              | 2.35E-04 | -2.23      | Up Regulated      |
| 767661  | zgc:153046        | 1.03E-02 | -0.71      | Up Regulated      |
| 767664  | zgc:153177        | 5.41E-03 | -0.77      | Up Regulated      |
| 767671  | ccdc146           | 1.47E-02 | -0.81      | Up Regulated      |
| 767699  | pmt               | 1.34E-02 | -0.60      | Up Regulated      |
| 767713  | zgc:154067        | 2.50E-03 | -0.67      | Up Regulated      |
| 767778  | zgc:154071        | 1.34E-02 | -0.62      | Up Regulated      |
| 767793  | ccdc37            | 2.66E-02 | -0.52      | Up Regulated      |
| 768123  | zgc:154116        | 2.79E-03 | -1.12      | Up Regulated      |
| 768134  | si:dkey-184p18.2  | 6.70E-03 | -0.57      | Up Regulated      |
| 768135  | zgc:153341        | 8.89E-04 | -0.63      | Up Regulated      |
| 768152  | zgc:153687        | 2.97E-02 | -0.62      | Up Regulated      |
| 768161  | zgc:153041        | 1.58E-02 | -0.54      | Up Regulated      |
| 768192  | zgc:153035        | 2.69E-02 | -0.55      | Up Regulated      |

**Table S9: Up/Down regulated genes of mitfa KD.**

| Gene ID   | Gene Symbol       | Pvalue   | diff_KO_WT | UP/Down Regulated |
|-----------|-------------------|----------|------------|-------------------|
| 777623    | zgc:154093        | 1.41E-02 | -0.61      | Up Regulated      |
| 790933    | fam132a           | 1.35E-02 | -0.53      | Up Regulated      |
| 791153    | ldlrap1b          | 1.72E-02 | -0.70      | Up Regulated      |
| 791187    | srpk1b            | 1.58E-02 | -0.75      | Up Regulated      |
| 791212    | zgc:158296        | 2.28E-02 | -0.52      | Up Regulated      |
| 791222    | zgc:158636        | 2.71E-02 | -0.53      | Up Regulated      |
| 791500    | zgc:153921        | 1.56E-02 | -1.47      | Up Regulated      |
| 791595    | wnt11             | 2.01E-03 | -1.33      | Up Regulated      |
| 791612    | zgc:110847        | 2.01E-02 | -0.91      | Up Regulated      |
| 792182    | eef2a.1           | 9.58E-03 | -0.73      | Up Regulated      |
| 792919    | LOC792919         | 4.43E-03 | -1.19      | Up Regulated      |
| 792923    | rnmtl1b           | 1.64E-03 | -0.51      | Up Regulated      |
| 792966    | LOC792966         | 1.68E-02 | -0.53      | Up Regulated      |
| 793666    | popdc2            | 1.27E-02 | -0.83      | Up Regulated      |
| 794079    | pdc11             | 5.43E-03 | -0.69      | Up Regulated      |
| 794522    | LOC794522         | 1.89E-04 | -0.79      | Up Regulated      |
| 794891    | si:ch211-89f7.4   | 1.75E-02 | -0.85      | Up Regulated      |
| 795748    | LOC795748         | 3.69E-03 | -1.51      | Up Regulated      |
| 796378    | si:dkey-286j15.1  | 2.51E-03 | -0.75      | Up Regulated      |
| 796814    | LOC796814         | 6.71E-03 | -0.81      | Up Regulated      |
| 797085    | LOC797085         | 1.16E-02 | -0.69      | Up Regulated      |
| 797099    | si:dkeyp-84a8.8   | 8.21E-04 | -0.72      | Up Regulated      |
| 797196    | dnajc12           | 7.61E-04 | -0.56      | Up Regulated      |
| 797198    | wu:fk33d07        | 4.74E-05 | -0.87      | Up Regulated      |
| 797343    | zgc:162301        | 1.60E-03 | -0.66      | Up Regulated      |
| 797346    | spint1b           | 2.27E-02 | -0.69      | Up Regulated      |
| 797675    | LOC797675         | 5.81E-03 | -0.87      | Up Regulated      |
| 798290    | LOC798290         | 2.34E-02 | -1.96      | Up Regulated      |
| 798354    | ropn1l            | 1.85E-02 | -0.55      | Up Regulated      |
| 799423    | si:ch211-191i18.3 | 1.42E-02 | -0.76      | Up Regulated      |
| 799739    | spata17           | 7.11E-03 | -0.75      | Up Regulated      |
| 799782    | LOC799782         | 1.84E-03 | -0.58      | Up Regulated      |
| 100000098 | LOC100000098      | 5.53E-03 | -0.55      | Up Regulated      |
| 100000596 | LOC100000596      | 2.44E-02 | -0.67      | Up Regulated      |
| 100000748 | LOC100000748      | 1.04E-02 | -0.73      | Up Regulated      |
| 100002136 | si:ch211-224b1.4  | 4.12E-03 | -0.77      | Up Regulated      |
| 100002293 | zgc:110020        | 2.55E-02 | -0.51      | Up Regulated      |
| 100002541 | zgc:172053        | 4.57E-03 | -0.84      | Up Regulated      |
| 100003066 | LOC100003066      | 9.07E-03 | -0.60      | Up Regulated      |
| 100003104 | LOC100003104      | 1.62E-02 | -0.53      | Up Regulated      |
| 100003313 | zgc:123180        | 5.41E-03 | -0.61      | Up Regulated      |
| 100004673 | zgc:194508        | 1.12E-02 | -0.80      | Up Regulated      |
| 100005086 | si:ch211-93g23.2  | 1.15E-02 | -0.79      | Up Regulated      |
| 100005148 | ar                | 1.79E-04 | -0.54      | Up Regulated      |
| 100005158 | cox11             | 6.40E-03 | -0.57      | Up Regulated      |
| 100005455 | mettl20           | 5.02E-03 | -0.69      | Up Regulated      |
| 100005763 | uck2a             | 1.61E-02 | -0.67      | Up Regulated      |
| 100006146 | LOC100006146      | 1.42E-02 | -0.94      | Up Regulated      |
| 100007289 | si:dkey-21o19.6   | 2.64E-02 | -3.10      | Up Regulated      |
| 100007926 | p2ry11            | 2.23E-02 | -0.62      | Up Regulated      |
| 100008088 | zgc:173556        | 2.37E-02 | -0.62      | Up Regulated      |
| 100009635 | dhx37             | 3.85E-03 | -0.74      | Up Regulated      |
| 100009650 | zgc:158482        | 8.10E-03 | -0.64      | Up Regulated      |
| 100034415 | si:dkey-6a5.3     | 7.24E-03 | -0.50      | Up Regulated      |
| 100034506 | si:ch211-232m10.4 | 5.23E-03 | -0.52      | Up Regulated      |

**Table S9: Up/Down regulated genes of mitfa KD.**

| Gene ID   | Gene Symbol       | Pvalue   | diff_KO_WT | UP/Down Regulated |
|-----------|-------------------|----------|------------|-------------------|
| 100037317 | cdnf              | 3.68E-03 | -0.79      | Up Regulated      |
| 100037332 | zgc:162608        | 5.75E-03 | -1.39      | Up Regulated      |
| 100038797 | rhcga             | 6.73E-03 | -1.59      | Up Regulated      |
| 100093702 | si:dkey-121a9.3   | 3.14E-03 | -0.91      | Up Regulated      |
| 100124531 | lox15b            | 2.10E-02 | -0.88      | Up Regulated      |
| 100126104 | zgc:171779        | 1.03E-02 | -1.04      | Up Regulated      |
| 100126114 | zgc:171679        | 3.31E-03 | -0.56      | Up Regulated      |
| 100136849 | zgc:172270        | 3.79E-03 | -0.96      | Up Regulated      |
| 100137128 | hbl4              | 6.81E-03 | -0.74      | Up Regulated      |
| 100147884 | or132-2           | 2.48E-02 | -0.89      | Up Regulated      |
| 100148342 | atp8b1            | 1.64E-02 | -0.68      | Up Regulated      |
| 100148706 | or125-4           | 2.87E-02 | -1.21      | Up Regulated      |
| 100149100 | LOC100149100      | 1.48E-02 | -0.59      | Up Regulated      |
| 100150665 | LOC100150665      | 2.34E-03 | -0.76      | Up Regulated      |
| 100170836 | odf3l2            | 5.28E-03 | -0.80      | Up Regulated      |
| 100307105 | si:rp71-80o10.4   | 2.39E-02 | -0.92      | Up Regulated      |
| 100317105 | si:ch211-145b13.6 | 6.83E-04 | -0.66      | Up Regulated      |
| 100318879 | si:dkey-148f10.4  | 2.21E-05 | -0.71      | Up Regulated      |
| 100329344 | LOC100329344      | 2.13E-02 | -1.13      | Up Regulated      |
| 100329570 | LOC100329570      | 1.73E-02 | -0.68      | Up Regulated      |
| 100330805 | LOC100330805      | 7.69E-03 | -0.64      | Up Regulated      |
| 100331324 | LOC100331324      | 2.36E-02 | -1.13      | Up Regulated      |
| 100331698 | LOC100331698      | 2.49E-02 | -0.90      | Up Regulated      |
| 100332249 | LOC100332249      | 1.39E-02 | -0.76      | Up Regulated      |
| 100332610 | LOC100332610      | 2.70E-03 | -0.94      | Up Regulated      |
| 100332843 | LOC100332843      | 4.50E-03 | -0.61      | Up Regulated      |
| 100333064 | LOC100333064      | 2.01E-02 | -0.53      | Up Regulated      |
| 100333759 | si:ch211-264f7.1  | 7.08E-03 | -0.64      | Up Regulated      |
| 100334215 | LOC100334215      | 2.95E-02 | -0.53      | Up Regulated      |
| 100334610 | LOC100334610      | 1.10E-02 | -1.38      | Up Regulated      |
| 100334939 | LOC100334939      | 1.11E-02 | -0.50      | Up Regulated      |
| 30066     | meis2.1           | 1.26E-02 | 0.87       | Down Regulated    |
| 30101     | skia              | 1.33E-02 | 0.54       | Down Regulated    |
| 30147     | isl1              | 7.37E-03 | 0.91       | Down Regulated    |
| 30157     | isl2a             | 2.24E-02 | 0.50       | Down Regulated    |
| 30207     | tyr               | 1.08E-02 | 0.77       | Down Regulated    |
| 30248     | calr              | 2.15E-02 | 0.53       | Down Regulated    |
| 30317     | hoxb5a            | 2.45E-02 | 0.60       | Down Regulated    |
| 30349     | hoxd3a            | 1.88E-02 | 0.64       | Down Regulated    |
| 30418     | nr2f1a            | 9.87E-04 | 0.78       | Down Regulated    |
| 30424     | nr2f2             | 1.99E-02 | 0.54       | Down Regulated    |
| 30425     | pax2a             | 1.78E-02 | 0.58       | Down Regulated    |
| 30463     | lhx1a             | 2.96E-02 | 0.95       | Down Regulated    |
| 30501     | otx2              | 1.75E-02 | 0.88       | Down Regulated    |
| 30510     | tcf7l2            | 3.45E-05 | 0.75       | Down Regulated    |
| 30598     | vsx1              | 1.59E-02 | 2.44       | Down Regulated    |
| 30634     | nadl1.2           | 9.35E-03 | 0.63       | Down Regulated    |
| 30635     | six3a             | 1.79E-02 | 0.57       | Down Regulated    |
| 30656     | nadl1.1           | 1.74E-02 | 0.53       | Down Regulated    |
| 30676     | glra1             | 1.71E-03 | 0.63       | Down Regulated    |
| 30679     | prox1             | 1.93E-03 | 0.90       | Down Regulated    |
| 30701     | lef1              | 8.31E-03 | 0.58       | Down Regulated    |
| 30712     | snap25a           | 9.71E-03 | 0.60       | Down Regulated    |
| 30726     | cntn2             | 2.29E-02 | 0.58       | Down Regulated    |
| 30732     | elavl3            | 2.32E-02 | 0.52       | Down Regulated    |

**Table S9: Up/Down regulated genes of mitfa KD.**

| Gene ID | Gene Symbol       | Pvalue   | diff_KO_WT | UP/Down Regulated |
|---------|-------------------|----------|------------|-------------------|
| 30737   | elavl4            | 7.34E-03 | 0.93       | Down Regulated    |
| 30745   | pdgfra            | 1.96E-03 | 0.64       | Down Regulated    |
| 30749   | nr5a2             | 6.04E-03 | 0.73       | Down Regulated    |
| 30766   | tal1              | 9.99E-03 | 0.61       | Down Regulated    |
| 57922   | celf3             | 1.39E-02 | 0.92       | Down Regulated    |
| 58038   | stx1b             | 8.15E-03 | 0.70       | Down Regulated    |
| 58057   | pou4f1            | 5.84E-03 | 1.00       | Down Regulated    |
| 58061   | hoxa11a           | 2.63E-02 | 0.56       | Down Regulated    |
| 58074   | dct               | 9.50E-06 | 0.91       | Down Regulated    |
| 58134   | adarb1            | 4.44E-03 | 0.89       | Down Regulated    |
| 60309   | robo2             | 2.31E-02 | 0.61       | Down Regulated    |
| 60310   | hmx3              | 1.89E-02 | 0.54       | Down Regulated    |
| 64279   | psmb11            | 1.39E-03 | 0.74       | Down Regulated    |
| 64603   | eomesa            | 4.32E-04 | 0.58       | Down Regulated    |
| 64610   | atp1a3a           | 1.37E-02 | 1.09       | Down Regulated    |
| 65231   | mdkb              | 2.05E-02 | 0.52       | Down Regulated    |
| 81881   | crx               | 2.15E-02 | 2.84       | Down Regulated    |
| 114415  | neurod6b          | 2.32E-02 | 1.54       | Down Regulated    |
| 114467  | maf               | 1.43E-02 | 0.89       | Down Regulated    |
| 117234  | mab2112           | 1.60E-02 | 0.77       | Down Regulated    |
| 140615  | fads2             | 2.81E-03 | 1.55       | Down Regulated    |
| 140618  | tfap2a            | 5.45E-04 | 0.57       | Down Regulated    |
| 140621  | casp3a            | 4.35E-03 | 0.51       | Down Regulated    |
| 140744  | ckbb              | 1.01E-02 | 1.04       | Down Regulated    |
| 142987  | dmbx1a            | 2.78E-02 | 0.64       | Down Regulated    |
| 170782  | mkrn1             | 6.32E-03 | 0.65       | Down Regulated    |
| 245948  | gbx2              | 8.05E-03 | 0.66       | Down Regulated    |
| 246091  | mab2111           | 6.52E-03 | 0.81       | Down Regulated    |
| 259186  | pcdh10a           | 4.44E-03 | 0.74       | Down Regulated    |
| 266794  | ccng2             | 9.38E-04 | 1.00       | Down Regulated    |
| 266965  | tlx3b             | 9.76E-03 | 0.54       | Down Regulated    |
| 280646  | lmo1              | 9.39E-03 | 1.03       | Down Regulated    |
| 282554  | drd3              | 1.85E-02 | 1.49       | Down Regulated    |
| 286784  | arl13b            | 4.84E-04 | 0.51       | Down Regulated    |
| 321113  | zgc:65851         | 1.05E-02 | 0.57       | Down Regulated    |
| 321239  | pmela             | 2.85E-03 | 0.76       | Down Regulated    |
| 321707  | si:ch211-57k11.4  | 2.92E-03 | 0.87       | Down Regulated    |
| 321742  | si:ch211-288g17.3 | 7.96E-03 | 0.53       | Down Regulated    |
| 322056  | sulf2l            | 2.76E-03 | 0.67       | Down Regulated    |
| 322485  | agt               | 2.01E-02 | 1.67       | Down Regulated    |
| 322970  | wu:fb78a10        | 6.11E-03 | 0.51       | Down Regulated    |
| 323326  | zgc:73225         | 2.00E-02 | 0.58       | Down Regulated    |
| 323342  | wu:fb95f11        | 1.82E-02 | 0.55       | Down Regulated    |
| 323473  | prdm1a            | 2.30E-03 | 0.84       | Down Regulated    |
| 323699  | wu:fc07c11        | 4.93E-03 | 0.51       | Down Regulated    |
| 323706  | rtn1a             | 1.62E-02 | 0.94       | Down Regulated    |
| 324153  | taf13             | 5.39E-03 | 0.65       | Down Regulated    |
| 324160  | wu:fc20g02        | 1.34E-02 | 0.73       | Down Regulated    |
| 324261  | sp5l              | 3.74E-03 | 1.53       | Down Regulated    |
| 324285  | wu:fc23f11        | 7.57E-03 | 0.74       | Down Regulated    |
| 324416  | dpysl5a           | 8.29E-03 | 0.71       | Down Regulated    |
| 324723  | zgc:73290         | 4.93E-03 | 0.73       | Down Regulated    |
| 324920  | wu:fc48a11        | 4.90E-03 | 0.67       | Down Regulated    |
| 324971  | zgc:73142         | 1.27E-02 | 0.97       | Down Regulated    |
| 325288  | olig2             | 2.03E-02 | 0.90       | Down Regulated    |

**Table S9: Up/Down regulated genes of mitfa KD.**

| Gene ID | Gene Symbol       | Pvalue   | diff_KO_WT | UP/Down Regulated |
|---------|-------------------|----------|------------|-------------------|
| 325356  | rcan3             | 1.93E-02 | 0.68       | Down Regulated    |
| 325372  | sprt2             | 1.99E-03 | 0.71       | Down Regulated    |
| 325395  | mll5              | 1.46E-03 | 0.55       | Down Regulated    |
| 325402  | atp6v0cb          | 9.96E-03 | 0.80       | Down Regulated    |
| 325607  | wu:fc92b01        | 6.09E-03 | 0.53       | Down Regulated    |
| 325690  | serinc1           | 2.92E-02 | 0.56       | Down Regulated    |
| 327065  | rtn1b             | 7.12E-03 | 0.88       | Down Regulated    |
| 327160  | apba2             | 2.74E-02 | 0.75       | Down Regulated    |
| 327165  | pgam1b            | 1.17E-02 | 0.62       | Down Regulated    |
| 327415  | kcnd3             | 1.41E-02 | 0.67       | Down Regulated    |
| 327429  | zgc:55318         | 2.29E-02 | 0.63       | Down Regulated    |
| 334035  | olfm2             | 2.02E-02 | 0.94       | Down Regulated    |
| 334490  | hnrnpu            | 2.73E-03 | 0.64       | Down Regulated    |
| 334798  | wu:fa04a07        | 8.58E-03 | 0.52       | Down Regulated    |
| 334932  | mdm4              | 6.96E-04 | 0.81       | Down Regulated    |
| 335257  | lmbird2b          | 8.77E-03 | 0.57       | Down Regulated    |
| 335357  | syt4              | 2.31E-02 | 0.69       | Down Regulated    |
| 335551  | zgc:73062         | 1.43E-02 | 0.77       | Down Regulated    |
| 335667  | wu:fk54d01        | 2.01E-02 | 0.69       | Down Regulated    |
| 335699  | wu:fk57g06        | 1.43E-02 | 0.57       | Down Regulated    |
| 335707  | ptmaa             | 2.89E-02 | 0.58       | Down Regulated    |
| 335737  | si:dkey-52h23.1   | 1.26E-02 | 0.55       | Down Regulated    |
| 335836  | slc1a2b           | 1.56E-02 | 0.89       | Down Regulated    |
| 335881  | kidins220b        | 9.83E-03 | 0.73       | Down Regulated    |
| 336042  | wu:fj44g11        | 1.63E-02 | 0.64       | Down Regulated    |
| 336082  | nell2b            | 2.92E-02 | 0.90       | Down Regulated    |
| 336089  | wu:fj48a08        | 3.58E-03 | 0.57       | Down Regulated    |
| 336099  | trim9             | 7.92E-03 | 0.74       | Down Regulated    |
| 336116  | bnip3             | 2.06E-02 | 0.75       | Down Regulated    |
| 336227  | cdr2l             | 2.77E-02 | 0.60       | Down Regulated    |
| 336248  | wu:fj59c10        | 1.64E-03 | 0.69       | Down Regulated    |
| 336281  | vamp2             | 7.46E-03 | 0.82       | Down Regulated    |
| 336319  | wu:fj63c11        | 9.76E-05 | 0.66       | Down Regulated    |
| 336346  | sox4a             | 5.51E-03 | 0.90       | Down Regulated    |
| 337168  | nbr1              | 2.32E-03 | 0.58       | Down Regulated    |
| 353179  | otx5              | 1.26E-02 | 1.40       | Down Regulated    |
| 360137  | dixdc1a           | 7.96E-03 | 0.59       | Down Regulated    |
| 360138  | pcdh10b           | 8.25E-03 | 0.54       | Down Regulated    |
| 368211  | ptn               | 2.04E-02 | 0.61       | Down Regulated    |
| 368223  | gpm6aa            | 2.17E-02 | 0.74       | Down Regulated    |
| 368305  | nptna             | 5.96E-03 | 0.51       | Down Regulated    |
| 368329  | cdkn1b            | 1.33E-02 | 0.51       | Down Regulated    |
| 368483  | nsfa              | 1.04E-02 | 0.96       | Down Regulated    |
| 368752  | vat1              | 5.26E-03 | 0.65       | Down Regulated    |
| 373103  | pak1              | 2.96E-02 | 0.72       | Down Regulated    |
| 373117  | celf2             | 1.11E-02 | 0.62       | Down Regulated    |
| 373872  | fyna              | 1.48E-03 | 0.69       | Down Regulated    |
| 378441  | gad1b             | 1.66E-02 | 0.87       | Down Regulated    |
| 378456  | cmt4b2            | 4.71E-03 | 0.57       | Down Regulated    |
| 378854  | zgc:110586        | 1.66E-02 | 0.59       | Down Regulated    |
| 378993  | si:ch211-195k18.2 | 8.49E-03 | 0.69       | Down Regulated    |
| 386590  | hsp90b1           | 4.44E-03 | 0.59       | Down Regulated    |
| 386701  | tubb5             | 2.24E-02 | 0.85       | Down Regulated    |
| 386762  | apc               | 1.41E-02 | 0.62       | Down Regulated    |
| 386768  | dnajc5aa          | 3.31E-03 | 0.59       | Down Regulated    |

**Table S9: Up/Down regulated genes of mitfa KD.**

| Gene ID | Gene Symbol | Pvalue   | diff_KO_WT | UP/Down Regulated |
|---------|-------------|----------|------------|-------------------|
| 387001  | wu:fc74b12  | 2.90E-02 | 0.57       | Down Regulated    |
| 387591  | ivns1abpa   | 1.38E-03 | 0.51       | Down Regulated    |
| 393118  | rap2ip      | 2.05E-02 | 0.70       | Down Regulated    |
| 393119  | ankrd12     | 3.87E-04 | 0.66       | Down Regulated    |
| 393229  | rbpms2      | 9.65E-03 | 0.62       | Down Regulated    |
| 393546  | zgc:65895   | 1.33E-02 | 0.59       | Down Regulated    |
| 393579  | slc25a1     | 2.71E-03 | 0.84       | Down Regulated    |
| 393614  | cacng2a     | 1.24E-02 | 0.89       | Down Regulated    |
| 393665  | ndrg1l      | 1.76E-02 | 1.91       | Down Regulated    |
| 393672  | rims2a      | 1.19E-02 | 0.78       | Down Regulated    |
| 393695  | zgc:73124   | 2.42E-02 | 0.67       | Down Regulated    |
| 393724  | rpe65a      | 9.41E-03 | 0.75       | Down Regulated    |
| 393794  | tfap2e      | 1.08E-02 | 0.98       | Down Regulated    |
| 393804  | amph        | 7.76E-03 | 0.86       | Down Regulated    |
| 393805  | mid1ip1b    | 1.33E-02 | 0.91       | Down Regulated    |
| 393844  | znrf1       | 1.56E-02 | 0.75       | Down Regulated    |
| 393875  | sox4b       | 1.81E-02 | 0.67       | Down Regulated    |
| 393930  | bhlhe22     | 8.52E-03 | 0.96       | Down Regulated    |
| 393944  | sncb        | 3.88E-03 | 0.83       | Down Regulated    |
| 393969  | gpr19       | 2.13E-02 | 0.60       | Down Regulated    |
| 394032  | irx2a       | 1.04E-02 | 0.82       | Down Regulated    |
| 394091  | sh3gl2      | 1.38E-02 | 0.62       | Down Regulated    |
| 394110  | atp6v1al    | 1.46E-02 | 0.69       | Down Regulated    |
| 394171  | shox2       | 1.49E-02 | 0.92       | Down Regulated    |
| 394174  | pik3cd      | 1.98E-02 | 0.55       | Down Regulated    |
| 394177  | zgc:56685   | 1.28E-02 | 0.90       | Down Regulated    |
| 394239  | tal2        | 7.47E-03 | 0.98       | Down Regulated    |
| 402812  | pth2        | 5.56E-03 | 1.29       | Down Regulated    |
| 402816  | pou4f2      | 1.10E-02 | 1.50       | Down Regulated    |
| 402833  | camsap1a    | 3.50E-03 | 0.64       | Down Regulated    |
| 402874  | eno2        | 1.33E-02 | 0.70       | Down Regulated    |
| 402929  | evlb        | 1.04E-02 | 0.80       | Down Regulated    |
| 402973  | nrp1b       | 6.75E-03 | 0.71       | Down Regulated    |
| 402991  | gadd45g     | 1.40E-02 | 0.51       | Down Regulated    |
| 402999  | irx4a       | 2.00E-02 | 1.09       | Down Regulated    |
| 403005  | zgc:77409   | 7.62E-03 | 0.59       | Down Regulated    |
| 403006  | nptnb       | 1.30E-02 | 0.94       | Down Regulated    |
| 403053  | hirip5      | 6.13E-03 | 0.71       | Down Regulated    |
| 403057  | zswim6      | 2.38E-02 | 0.75       | Down Regulated    |
| 403143  | sarm1       | 9.38E-03 | 0.89       | Down Regulated    |
| 403308  | rtn4rl1     | 1.36E-02 | 0.76       | Down Regulated    |
| 404233  | aplp        | 1.56E-03 | 0.63       | Down Regulated    |
| 405796  | dlg4        | 2.58E-02 | 0.62       | Down Regulated    |
| 405836  | zgc:77058   | 2.60E-02 | 1.06       | Down Regulated    |
| 405844  | zgc:77466   | 1.80E-02 | 0.68       | Down Regulated    |
| 405877  | maf2g       | 1.19E-02 | 0.66       | Down Regulated    |
| 405890  | esrrga      | 1.44E-02 | 0.94       | Down Regulated    |
| 405898  | pak7        | 5.15E-03 | 0.77       | Down Regulated    |
| 406239  | ccni        | 4.96E-03 | 0.80       | Down Regulated    |
| 406303  | tuba2       | 1.20E-02 | 1.00       | Down Regulated    |
| 406364  | elmo1       | 2.83E-02 | 0.59       | Down Regulated    |
| 406391  | zgc:65870   | 8.85E-03 | 0.53       | Down Regulated    |
| 406443  | ywhah       | 4.72E-03 | 0.68       | Down Regulated    |
| 406705  | fez1        | 3.69E-03 | 0.67       | Down Regulated    |
| 406834  | arglu1a     | 1.60E-02 | 0.59       | Down Regulated    |



**Table S9: Up/Down regulated genes of mitfa KD.**

| Gene ID | Gene Symbol | Pvalue   | diff_KO_WT | UP/Down Regulated |
|---------|-------------|----------|------------|-------------------|
| 407077  | nkx1.2lb    | 1.30E-02 | 0.86       | Down Regulated    |
| 407734  | gpm6ab      | 1.20E-02 | 0.75       | Down Regulated    |
| 407735  | gria4a      | 2.28E-02 | 0.57       | Down Regulated    |
| 407979  | cpe         | 2.05E-02 | 0.79       | Down Regulated    |
| 407982  | zgc:85722   | 1.67E-02 | 0.88       | Down Regulated    |
| 431714  | zgc:91968   | 1.51E-02 | 3.06       | Down Regulated    |
| 431740  | zgc:91860   | 4.38E-03 | 0.50       | Down Regulated    |
| 431770  | mpp2b       | 2.83E-02 | 0.53       | Down Regulated    |
| 432384  | rbp2b       | 8.90E-03 | 0.74       | Down Regulated    |
| 436636  | cd36        | 1.41E-02 | 0.76       | Down Regulated    |
| 436669  | zgc:92710   | 9.13E-03 | 1.10       | Down Regulated    |
| 436679  | nr4a2b      | 1.09E-02 | 0.93       | Down Regulated    |
| 436704  | rgs20       | 2.12E-02 | 0.81       | Down Regulated    |
| 436712  | tspan18b    | 1.29E-02 | 0.75       | Down Regulated    |
| 436736  | syt1a       | 3.00E-02 | 0.67       | Down Regulated    |
| 436742  | napg        | 2.82E-02 | 1.09       | Down Regulated    |
| 436745  | atp2b3a     | 4.55E-03 | 0.99       | Down Regulated    |
| 436781  | zgc:92827   | 4.07E-03 | 0.51       | Down Regulated    |
| 436788  | cdk5r1b     | 8.23E-03 | 1.16       | Down Regulated    |
| 436793  | cbln1       | 1.53E-02 | 0.75       | Down Regulated    |
| 436803  | rab3c       | 1.92E-02 | 0.84       | Down Regulated    |
| 436814  | rgs7        | 2.84E-02 | 0.60       | Down Regulated    |
| 436815  | camk2d2     | 9.66E-03 | 1.03       | Down Regulated    |
| 436822  | itm2ca      | 2.22E-02 | 0.68       | Down Regulated    |
| 436920  | zgc:92020   | 1.73E-02 | 0.86       | Down Regulated    |
| 436927  | pdlim5      | 1.74E-02 | 0.52       | Down Regulated    |
| 436939  | slc1a1      | 1.04E-02 | 0.83       | Down Regulated    |
| 437006  | nxph1       | 7.12E-03 | 1.08       | Down Regulated    |
| 437022  | tyrp1b      | 6.27E-03 | 1.03       | Down Regulated    |
| 437027  | rac3a       | 9.14E-03 | 0.61       | Down Regulated    |
| 442926  | t2gtl56     | 4.62E-03 | 0.77       | Down Regulated    |
| 445060  | b3gat2      | 1.28E-02 | 0.62       | Down Regulated    |
| 445061  | dnajb4      | 1.76E-02 | 0.51       | Down Regulated    |
| 445088  | c1qb        | 2.62E-02 | 0.87       | Down Regulated    |
| 445123  | zgc:100906  | 3.34E-03 | 0.77       | Down Regulated    |
| 445124  | chst1       | 1.67E-02 | 0.86       | Down Regulated    |
| 445212  | fam49a      | 3.57E-03 | 0.61       | Down Regulated    |
| 445213  | zgc:100994  | 1.92E-02 | 0.81       | Down Regulated    |
| 445286  | picalml     | 1.04E-02 | 0.53       | Down Regulated    |
| 445374  | negr1       | 1.34E-02 | 0.50       | Down Regulated    |
| 445478  | epb41l3a    | 7.28E-03 | 0.70       | Down Regulated    |
| 447837  | lingo1b     | 6.54E-03 | 1.04       | Down Regulated    |
| 447906  | zgc:101095  | 1.89E-02 | 0.50       | Down Regulated    |
| 447912  | vac14       | 2.36E-03 | 0.62       | Down Regulated    |
| 449546  | ric8a       | 2.34E-02 | 0.68       | Down Regulated    |
| 449554  | rbfox1      | 1.75E-02 | 0.95       | Down Regulated    |
| 449664  | arfip2a     | 3.84E-03 | 0.54       | Down Regulated    |
| 449794  | zgc:101846  | 1.30E-02 | 0.57       | Down Regulated    |
| 449864  | grin2da     | 2.76E-02 | 0.69       | Down Regulated    |
| 449991  | kctd15a     | 2.93E-02 | 0.53       | Down Regulated    |
| 450043  | ank2        | 1.69E-02 | 0.70       | Down Regulated    |
| 474317  | irx6a       | 1.27E-02 | 1.42       | Down Regulated    |
| 474318  | irx4b       | 2.90E-02 | 0.59       | Down Regulated    |
| 492490  | zgc:103663  | 1.86E-02 | 1.12       | Down Regulated    |
| 492566  | im:7141573  | 1.05E-02 | 0.86       | Down Regulated    |

**Table S9: Up/Down regulated genes of mitfa KD.**

| Gene ID | Gene Symbol       | Pvalue   | diff_KO_WT | UP/Down Regulated |
|---------|-------------------|----------|------------|-------------------|
| 492792  | gpr137ba          | 1.71E-02 | 0.56       | Down Regulated    |
| 492818  | zgc:101525        | 1.94E-02 | 0.74       | Down Regulated    |
| 493587  | pcdh2ac           | 2.77E-02 | 0.63       | Down Regulated    |
| 494033  | tfap2c            | 6.61E-04 | 0.58       | Down Regulated    |
| 494050  | zgc:101847        | 2.15E-02 | 0.51       | Down Regulated    |
| 494450  | slc6a5            | 7.35E-03 | 0.58       | Down Regulated    |
| 494492  | slc17a6a          | 2.47E-02 | 0.61       | Down Regulated    |
| 494533  | prkar1aa          | 7.33E-04 | 0.53       | Down Regulated    |
| 497072  | zgc:198371        | 2.09E-03 | 0.57       | Down Regulated    |
| 497127  | pcdh1a4           | 1.08E-02 | 0.79       | Down Regulated    |
| 497281  | ext1c             | 2.77E-02 | 0.76       | Down Regulated    |
| 497284  | zgc:92612         | 2.27E-02 | 0.81       | Down Regulated    |
| 497419  | zgc:165461        | 8.77E-03 | 0.80       | Down Regulated    |
| 503940  | spen              | 1.87E-03 | 0.51       | Down Regulated    |
| 541370  | gnb2              | 2.10E-02 | 0.59       | Down Regulated    |
| 541373  | nbea              | 2.15E-02 | 0.80       | Down Regulated    |
| 541396  | islr2             | 1.81E-02 | 0.83       | Down Regulated    |
| 541438  | tmem22            | 9.55E-03 | 0.71       | Down Regulated    |
| 541533  | scrt1b            | 2.17E-04 | 0.75       | Down Regulated    |
| 541540  | kcnab1            | 9.15E-03 | 0.56       | Down Regulated    |
| 548345  | nalcn             | 1.18E-02 | 0.83       | Down Regulated    |
| 548606  | erc1a             | 2.75E-02 | 0.62       | Down Regulated    |
| 548607  | si:dkey-22o20.1   | 1.70E-02 | 0.76       | Down Regulated    |
| 550228  | golga7ba          | 2.20E-02 | 0.56       | Down Regulated    |
| 550267  | kif3a             | 8.42E-03 | 0.50       | Down Regulated    |
| 550377  | sema6dl           | 2.47E-02 | 0.59       | Down Regulated    |
| 550397  | c1qtnf4           | 1.14E-02 | 0.70       | Down Regulated    |
| 550403  | gad2              | 1.09E-02 | 0.72       | Down Regulated    |
| 550405  | lhx9              | 1.31E-03 | 0.83       | Down Regulated    |
| 550511  | zgc:110314        | 1.16E-02 | 0.75       | Down Regulated    |
| 550545  | tfap2b            | 8.03E-03 | 1.04       | Down Regulated    |
| 553082  | klf7l             | 7.90E-04 | 0.54       | Down Regulated    |
| 553166  | dpysl3            | 4.28E-03 | 0.85       | Down Regulated    |
| 553186  | barhl1.1          | 3.15E-03 | 0.76       | Down Regulated    |
| 553266  | arrb1             | 1.06E-03 | 0.53       | Down Regulated    |
| 553281  | abcc8             | 1.04E-02 | 0.59       | Down Regulated    |
| 553300  | dchs1             | 5.12E-03 | 0.52       | Down Regulated    |
| 553331  | lnx2a             | 2.59E-02 | 0.82       | Down Regulated    |
| 553336  | lppr3a            | 1.54E-02 | 0.56       | Down Regulated    |
| 553377  | prg4b             | 2.03E-02 | 0.57       | Down Regulated    |
| 553402  | si:ch211-145n14.1 | 2.56E-02 | 0.67       | Down Regulated    |
| 553410  | dpysl5b           | 1.55E-02 | 0.85       | Down Regulated    |
| 553411  | dpysl4            | 2.53E-03 | 0.75       | Down Regulated    |
| 553422  | LOC553422         | 1.87E-02 | 1.02       | Down Regulated    |
| 553451  | LOC553451         | 2.12E-02 | 0.54       | Down Regulated    |
| 553542  | zgc:109889        | 1.15E-02 | 0.72       | Down Regulated    |
| 553565  | zgc:109985        | 5.67E-03 | 0.53       | Down Regulated    |
| 553590  | zgc:110158        | 5.46E-04 | 0.66       | Down Regulated    |
| 553591  | ttc39c            | 1.76E-03 | 0.66       | Down Regulated    |
| 553607  | camk2n1a          | 5.71E-03 | 0.53       | Down Regulated    |
| 553611  | six6b             | 5.22E-03 | 0.67       | Down Regulated    |
| 553619  | lactb             | 1.45E-03 | 0.65       | Down Regulated    |
| 553691  | atp6v0a1b         | 2.78E-02 | 0.63       | Down Regulated    |
| 553750  | mtmr1a            | 3.55E-03 | 0.89       | Down Regulated    |
| 553774  | lmo3              | 7.82E-03 | 0.83       | Down Regulated    |

**Table S9: Up/Down regulated genes of mitfa KD.**

| Gene ID | Gene Symbol       | Pvalue         | diff_KO_WT | UP/Down Regulated |
|---------|-------------------|----------------|------------|-------------------|
| 554123  |                   | 3-Sep 9.91E-04 | 0.67       | Down Regulated    |
| 554998  | pdia4             | 7.69E-03       | 0.51       | Down Regulated    |
| 555391  | trim3b            | 1.22E-03       | 0.55       | Down Regulated    |
| 555414  | wu:fa07b03        | 2.29E-02       | 0.81       | Down Regulated    |
| 555437  | LOC555437         | 2.31E-02       | 0.70       | Down Regulated    |
| 555640  | fam184a           | 1.40E-02       | 0.97       | Down Regulated    |
| 556080  | si:ch211-214j24.7 | 1.14E-02       | 0.56       | Down Regulated    |
| 556251  | LOC556251         | 2.40E-02       | 0.63       | Down Regulated    |
| 556338  | si:dkeyp-22b2.2   | 1.83E-02       | 0.56       | Down Regulated    |
| 556348  | wu:fj35c01        | 4.97E-03       | 0.57       | Down Regulated    |
| 556409  | g3bp2             | 2.24E-03       | 0.92       | Down Regulated    |
| 556453  | LOC556453         | 1.05E-02       | 0.66       | Down Regulated    |
| 556537  | nrcam             | 5.30E-03       | 0.81       | Down Regulated    |
| 556619  | chrna4            | 1.40E-02       | 0.66       | Down Regulated    |
| 556665  | nfia              | 2.77E-03       | 0.73       | Down Regulated    |
| 556789  | stxbp5a           | 2.27E-02       | 0.64       | Down Regulated    |
| 556928  | phactr3a          | 1.68E-02       | 0.96       | Down Regulated    |
| 557002  | myt1              | 9.23E-03       | 0.78       | Down Regulated    |
| 557148  | mdm1              | 1.81E-02       | 0.61       | Down Regulated    |
| 557162  | prdm8b            | 1.76E-02       | 0.95       | Down Regulated    |
| 557319  | im:7142942        | 5.51E-03       | 0.70       | Down Regulated    |
| 557451  | daam1a            | 7.81E-03       | 0.52       | Down Regulated    |
| 557463  | si:ch211-227c6.4  | 1.65E-02       | 0.66       | Down Regulated    |
| 557556  | dlgap3            | 1.15E-02       | 0.54       | Down Regulated    |
| 557661  | sox14             | 6.40E-03       | 1.16       | Down Regulated    |
| 557675  | c1galt1a          | 1.43E-02       | 0.78       | Down Regulated    |
| 557717  | stxbp1b           | 2.35E-02       | 1.12       | Down Regulated    |
| 557772  | si:ch211-250g4.3  | 2.86E-03       | 0.99       | Down Regulated    |
| 558164  | si:ch211-246m4.3  | 1.09E-02       | 1.26       | Down Regulated    |
| 558206  | cspg5a            | 1.83E-02       | 0.88       | Down Regulated    |
| 558311  | slc45a2           | 4.04E-03       | 0.51       | Down Regulated    |
| 558326  | nrxn2a            | 1.35E-02       | 0.90       | Down Regulated    |
| 558453  | si:dkey-12o15.1   | 6.28E-03       | 0.50       | Down Regulated    |
| 558560  | lcor              | 1.77E-03       | 0.64       | Down Regulated    |
| 558790  | sult3st1          | 1.61E-02       | 0.56       | Down Regulated    |
| 558810  | ppp2r2bb          | 6.35E-03       | 0.63       | Down Regulated    |
| 558834  | si:dkey-92k1.12   | 9.04E-04       | 0.53       | Down Regulated    |
| 558981  | si:ch211-81a5.7   | 2.19E-03       | 0.60       | Down Regulated    |
| 558997  | dclk1             | 1.99E-02       | 1.00       | Down Regulated    |
| 559029  | si:ch211-214j24.9 | 1.96E-02       | 0.78       | Down Regulated    |
| 559358  | cspg5b            | 1.95E-02       | 1.48       | Down Regulated    |
| 559375  | si:ch211-108c6.2  | 2.81E-02       | 1.04       | Down Regulated    |
| 559447  | scn1lab           | 9.24E-03       | 0.71       | Down Regulated    |
| 559505  | myt1la            | 1.91E-02       | 1.18       | Down Regulated    |
| 559643  | LOC559643         | 2.45E-02       | 0.57       | Down Regulated    |
| 559668  | slc29a4           | 1.42E-02       | 0.74       | Down Regulated    |
| 559732  | ttc9b             | 1.57E-02       | 0.74       | Down Regulated    |
| 559786  | dtmb              | 9.69E-03       | 0.50       | Down Regulated    |
| 559792  | LOC559792         | 5.97E-03       | 0.72       | Down Regulated    |
| 559868  | LOC559868         | 1.43E-02       | 0.74       | Down Regulated    |
| 559941  | si:ch211-1o14.5   | 2.52E-02       | 0.73       | Down Regulated    |
| 560062  | si:ch73-60i13.2   | 1.51E-02       | 0.65       | Down Regulated    |
| 560168  | coro1b            | 3.34E-03       | 0.76       | Down Regulated    |
| 560413  | si:ch211-15i6.4   | 5.43E-03       | 0.53       | Down Regulated    |
| 560560  | ywhag2            | 1.72E-02       | 0.67       | Down Regulated    |

**Table S9: Up/Down regulated genes of mitfa KD.**

| Gene ID | Gene Symbol       | Pvalue   | diff_KO_WT | UP/Down Regulated |
|---------|-------------------|----------|------------|-------------------|
| 560594  | garnl3            | 5.47E-03 | 0.51       | Down Regulated    |
| 560805  | LOC560805         | 2.79E-02 | 0.83       | Down Regulated    |
| 561162  | vsnl1b            | 1.22E-02 | 0.70       | Down Regulated    |
| 561285  | LOC561285         | 6.65E-03 | 0.58       | Down Regulated    |
| 561336  | pcdh17            | 2.52E-02 | 0.55       | Down Regulated    |
| 561408  | LOC561408         | 2.55E-03 | 0.81       | Down Regulated    |
| 561525  | dync1i1           | 3.05E-03 | 0.77       | Down Regulated    |
| 561653  | vps45             | 1.60E-02 | 0.51       | Down Regulated    |
| 561679  | col11a2           | 2.65E-02 | 0.70       | Down Regulated    |
| 561769  | wu:fq41a10        | 3.48E-03 | 0.61       | Down Regulated    |
| 561879  | asap1             | 9.61E-03 | 0.97       | Down Regulated    |
| 561905  | mlphb             | 1.08E-02 | 1.41       | Down Regulated    |
| 561943  | neur1a            | 1.62E-02 | 0.75       | Down Regulated    |
| 562019  | wu:fc07b10        | 9.56E-03 | 0.62       | Down Regulated    |
| 562136  | si:dkey-13n15.2   | 1.20E-02 | 0.92       | Down Regulated    |
| 562282  | LOC562282         | 1.81E-02 | 0.72       | Down Regulated    |
| 562381  | si:dkey-76p14.4   | 2.37E-03 | 1.05       | Down Regulated    |
| 562450  | LOC562450         | 1.19E-02 | 0.64       | Down Regulated    |
| 562633  | LOC562633         | 1.78E-02 | 0.64       | Down Regulated    |
| 563117  | si:dkey-174m14.3  | 2.69E-02 | 0.78       | Down Regulated    |
| 563166  | rimbp2            | 9.60E-04 | 0.61       | Down Regulated    |
| 563197  | odz2              | 1.43E-02 | 0.72       | Down Regulated    |
| 563244  | zgc:158337        | 1.72E-02 | 0.68       | Down Regulated    |
| 563252  | LOC563252         | 1.70E-02 | 0.73       | Down Regulated    |
| 563352  | LOC563352         | 4.64E-03 | 0.65       | Down Regulated    |
| 563353  | si:ch211-106n13.3 | 3.04E-03 | 0.81       | Down Regulated    |
| 563377  | rph3ab            | 6.54E-03 | 0.55       | Down Regulated    |
| 563561  | LOC563561         | 8.49E-03 | 1.29       | Down Regulated    |
| 563578  | tbc1d9            | 2.86E-02 | 0.56       | Down Regulated    |
| 563730  | si:ch211-106n13.1 | 1.65E-02 | 0.75       | Down Regulated    |
| 563802  | kcnh2l            | 7.73E-03 | 0.82       | Down Regulated    |
| 563874  | LOC563874         | 2.25E-02 | 1.76       | Down Regulated    |
| 563942  | kat2b             | 1.57E-02 | 0.88       | Down Regulated    |
| 564019  | t1e1              | 8.31E-03 | 0.77       | Down Regulated    |
| 564147  | glsa              | 4.69E-04 | 0.68       | Down Regulated    |
| 564165  | zgc:172323        | 1.19E-03 | 1.97       | Down Regulated    |
| 564367  | si:ch211-233a24.2 | 2.25E-02 | 0.53       | Down Regulated    |
| 564403  | si:ch211-153j24.3 | 3.38E-04 | 0.80       | Down Regulated    |
| 564462  | sc:d0316          | 2.29E-02 | 0.80       | Down Regulated    |
| 564915  | gnaz              | 2.63E-02 | 0.53       | Down Regulated    |
| 564943  | lingo1a           | 2.38E-02 | 0.67       | Down Regulated    |
| 565021  | lrrc4.1           | 6.20E-03 | 0.57       | Down Regulated    |
| 565109  | zgc:153779        | 1.28E-02 | 1.04       | Down Regulated    |
| 565492  | apl1rb            | 2.64E-02 | 0.67       | Down Regulated    |
| 565507  | apba1             | 4.84E-03 | 0.97       | Down Regulated    |
| 565531  | nr1a              | 6.45E-03 | 0.67       | Down Regulated    |
| 565700  | sat1a             | 4.53E-04 | 0.63       | Down Regulated    |
| 565771  | apc2              | 1.01E-02 | 0.91       | Down Regulated    |
| 565842  | si:dkey-266j7.1   | 2.19E-03 | 0.58       | Down Regulated    |
| 565863  | LOC565863         | 8.34E-03 | 0.68       | Down Regulated    |
| 566117  | zgc:163001        | 9.07E-03 | 0.80       | Down Regulated    |
| 566219  | d1f1              | 2.66E-02 | 0.79       | Down Regulated    |
| 566408  | si:ch73-6k16.1    | 2.65E-02 | 0.52       | Down Regulated    |
| 566456  | LOC566456         | 2.72E-02 | 0.81       | Down Regulated    |
| 566591  | furinb            | 2.67E-03 | 0.50       | Down Regulated    |

**Table S9: Up/Down regulated genes of mitfa KD.**

| Gene ID | Gene Symbol      | Pvalue   | diff_KO_WT | UP/Down Regulated |
|---------|------------------|----------|------------|-------------------|
| 566596  | si:dkey-153k10.9 | 1.12E-02 | 0.72       | Down Regulated    |
| 566608  | upf3a            | 1.64E-02 | 0.64       | Down Regulated    |
| 566685  | arrdc3a          | 2.56E-03 | 0.55       | Down Regulated    |
| 567095  | ptprt            | 2.73E-02 | 0.96       | Down Regulated    |
| 567151  | EIF3HB           | 8.08E-03 | 0.51       | Down Regulated    |
| 567190  | git2b            | 3.22E-03 | 0.54       | Down Regulated    |
| 567355  | gpr27            | 1.04E-02 | 0.94       | Down Regulated    |
| 567419  | oca2             | 6.48E-04 | 0.86       | Down Regulated    |
| 567479  | SSH1B            | 1.76E-02 | 0.63       | Down Regulated    |
| 567731  | FAM69B           | 1.30E-02 | 0.66       | Down Regulated    |
| 567751  | EBF3             | 6.72E-03 | 0.84       | Down Regulated    |
| 568055  | zgc:109984       | 2.60E-02 | 1.17       | Down Regulated    |
| 568165  | si:ch211-278j3.3 | 2.85E-02 | 0.50       | Down Regulated    |
| 568315  | NFATC1           | 2.05E-03 | 0.50       | Down Regulated    |
| 568367  | si:ch211-160j6.2 | 5.57E-03 | 0.59       | Down Regulated    |
| 568464  | ZFPM2B           | 1.07E-02 | 1.37       | Down Regulated    |
| 568618  | si:dkey-110c1.7  | 6.59E-03 | 0.66       | Down Regulated    |
| 568668  | NTRK3B           | 1.15E-02 | 0.51       | Down Regulated    |
| 568981  | ANKRD13B         | 4.49E-03 | 0.64       | Down Regulated    |
| 568996  | ZFPM2A           | 2.22E-02 | 1.75       | Down Regulated    |
| 569012  | zgc:194665       | 2.46E-02 | 0.63       | Down Regulated    |
| 569698  | MAPK10           | 6.60E-03 | 0.76       | Down Regulated    |
| 569855  | CACNG2B          | 2.30E-02 | 0.92       | Down Regulated    |
| 569946  | zgc:162329       | 2.69E-02 | 0.58       | Down Regulated    |
| 570011  | wu:fb77g05       | 1.17E-02 | 1.08       | Down Regulated    |
| 570082  | MXD1             | 4.73E-03 | 0.62       | Down Regulated    |
| 570094  | zgc:165621       | 1.26E-03 | 0.61       | Down Regulated    |
| 570147  | ADD2             | 1.00E-02 | 0.69       | Down Regulated    |
| 570312  | SLC24A5          | 2.93E-02 | 0.58       | Down Regulated    |
| 570321  | si:dkeyp-117h8.2 | 1.16E-02 | 0.93       | Down Regulated    |
| 570606  | zgc:194983       | 1.97E-02 | 0.60       | Down Regulated    |
| 570693  | LOC570693        | 7.70E-03 | 1.15       | Down Regulated    |
| 570841  | TRPC1            | 6.55E-03 | 0.60       | Down Regulated    |
| 570960  | zgc:158824       | 1.01E-02 | 0.82       | Down Regulated    |
| 571143  | MMP24            | 1.39E-02 | 0.89       | Down Regulated    |
| 571355  | AMPD2            | 2.22E-02 | 0.60       | Down Regulated    |
| 571425  | zgc:165603       | 2.03E-02 | 0.71       | Down Regulated    |
| 571586  | LOC571586        | 1.87E-02 | 0.63       | Down Regulated    |
| 571664  | FSTL4            | 1.64E-02 | 0.86       | Down Regulated    |
| 571943  | si:dkeyp-35f11.3 | 2.26E-02 | 1.20       | Down Regulated    |
| 572084  | zgc:158291       | 7.18E-03 | 1.21       | Down Regulated    |
| 572369  | KIRREL3          | 2.23E-02 | 1.00       | Down Regulated    |
| 573122  | TUBA1L           | 1.79E-02 | 1.00       | Down Regulated    |
| 664741  | INPP4A           | 1.24E-02 | 0.57       | Down Regulated    |
| 664748  | SHOX             | 2.15E-02 | 1.03       | Down Regulated    |
| 664755  | zgc:110045       | 2.06E-02 | 0.95       | Down Regulated    |
| 678521  | zgc:136878       | 2.68E-02 | 1.69       | Down Regulated    |
| 678523  | zgc:136874       | 1.37E-02 | 0.55       | Down Regulated    |
| 678560  | CACNB4B          | 1.58E-02 | 0.50       | Down Regulated    |
| 678600  | RAB40C           | 2.40E-02 | 0.76       | Down Regulated    |
| 678641  | DAB1B            | 8.45E-03 | 1.07       | Down Regulated    |
| 678650  | BCL11AA          | 9.96E-04 | 0.68       | Down Regulated    |
| 678652  | zgc:136817       | 5.86E-03 | 0.55       | Down Regulated    |
| 692255  | DACHC            | 2.96E-02 | 0.64       | Down Regulated    |
| 692305  | NDRG4            | 1.54E-02 | 0.99       | Down Regulated    |

**Table S9: Up/Down regulated genes of mitfa KD.**

| Gene ID   | Gene Symbol      | Pvalue   | diff_KO_WT | UP/Down Regulated |
|-----------|------------------|----------|------------|-------------------|
| 692351    | dab1a            | 2.77E-02 | 0.90       | Down Regulated    |
| 751668    | gck              | 2.76E-03 | 0.97       | Down Regulated    |
| 751673    | zgc:153240       | 3.10E-03 | 1.05       | Down Regulated    |
| 767685    | prkar1b          | 1.76E-02 | 0.59       | Down Regulated    |
| 767702    | tmem178          | 2.48E-02 | 0.51       | Down Regulated    |
| 767738    | abi1b            | 9.93E-04 | 0.57       | Down Regulated    |
| 767809    | runx1t1          | 5.40E-03 | 0.75       | Down Regulated    |
| 768130    | hmga1b           | 6.11E-03 | 0.78       | Down Regulated    |
| 768183    | gabra1           | 1.24E-02 | 1.09       | Down Regulated    |
| 768198    | klhl24           | 2.83E-02 | 0.55       | Down Regulated    |
| 768297    | zgc:153423       | 2.89E-02 | 0.86       | Down Regulated    |
| 777704    | zgc:123035       | 2.85E-02 | 0.77       | Down Regulated    |
| 777708    | zgc:153892       | 2.43E-02 | 0.50       | Down Regulated    |
| 777735    | fgf12            | 1.34E-02 | 0.52       | Down Regulated    |
| 790943    | phyhipla         | 1.41E-02 | 0.59       | Down Regulated    |
| 791150    | gripap1          | 2.61E-02 | 0.52       | Down Regulated    |
| 791170    | zgc:158791       | 1.63E-03 | 0.78       | Down Regulated    |
| 791179    | si:dkey-19f23.3  | 8.62E-03 | 0.52       | Down Regulated    |
| 792435    | astn1            | 1.70E-02 | 1.00       | Down Regulated    |
| 793087    | zgc:73189        | 9.58E-03 | 0.87       | Down Regulated    |
| 793364    | LOC793364        | 3.26E-04 | 1.08       | Down Regulated    |
| 793374    | LOC793374        | 2.63E-02 | 0.56       | Down Regulated    |
| 793907    | igfbp1b          | 1.01E-02 | 1.27       | Down Regulated    |
| 794175    | wu:fj40f01       | 1.06E-02 | 0.62       | Down Regulated    |
| 794258    | LOC794258        | 1.34E-02 | 0.89       | Down Regulated    |
| 794574    | ppp3ca           | 9.74E-03 | 0.85       | Down Regulated    |
| 794783    | zgc:162150       | 1.74E-02 | 1.73       | Down Regulated    |
| 796144    | LOC796144        | 1.44E-02 | 0.59       | Down Regulated    |
| 796345    | dnajc6           | 1.29E-02 | 1.00       | Down Regulated    |
| 796410    | LOC796410        | 2.44E-02 | 0.68       | Down Regulated    |
| 796981    | LOC796981        | 7.20E-03 | 0.62       | Down Regulated    |
| 797939    | LOC797939        | 2.61E-02 | 0.55       | Down Regulated    |
| 798555    | LOC798555        | 8.00E-03 | 0.90       | Down Regulated    |
| 798575    | slc32a1          | 1.44E-02 | 0.93       | Down Regulated    |
| 100000252 | pik3r3           | 2.67E-02 | 0.52       | Down Regulated    |
| 100000342 | mapta            | 1.21E-02 | 0.68       | Down Regulated    |
| 100000711 | ngb              | 4.59E-03 | 0.66       | Down Regulated    |
| 100000890 | LOC100000890     | 1.38E-02 | 0.60       | Down Regulated    |
| 100001552 | pcyt1ba          | 2.07E-02 | 0.81       | Down Regulated    |
| 100001699 | barhl2           | 6.61E-03 | 0.83       | Down Regulated    |
| 100002110 | stxbp6l          | 6.04E-05 | 0.79       | Down Regulated    |
| 100002795 | LOC100002795     | 1.28E-02 | 0.71       | Down Regulated    |
| 100003026 | dctn1b           | 5.48E-03 | 0.63       | Down Regulated    |
| 100003493 | si:dkey-229p15.1 | 6.78E-03 | 1.34       | Down Regulated    |
| 100003558 | ablim1a          | 5.16E-03 | 0.81       | Down Regulated    |
| 100003563 | stmn2b           | 5.21E-03 | 1.01       | Down Regulated    |
| 100003819 | zgc:172133       | 1.78E-02 | 0.70       | Down Regulated    |
| 100003938 | LOC100003938     | 1.93E-02 | 0.63       | Down Regulated    |
| 100004140 | LOC100004140     | 1.32E-02 | 0.64       | Down Regulated    |
| 100004523 | LOC100004523     | 2.11E-02 | 0.54       | Down Regulated    |
| 100004913 | phyhiplb         | 5.01E-03 | 0.53       | Down Regulated    |
| 100005195 | LOC100005195     | 2.28E-03 | 0.54       | Down Regulated    |
| 100005267 | LOC100005267     | 2.37E-02 | 0.54       | Down Regulated    |
| 100005846 | LOC100005846     | 1.20E-02 | 0.86       | Down Regulated    |
| 100006371 | zgc:171639       | 1.07E-02 | 0.80       | Down Regulated    |

**Table S9: Up/Down regulated genes of mitfa KD.**

| Gene ID   | Gene Symbol      | Pvalue   | diff_KO_WT | UP/Down Regulated |
|-----------|------------------|----------|------------|-------------------|
| 100006588 | LOC100006588     | 1.84E-02 | 0.54       | Down Regulated    |
| 100006754 | LOC100006754     | 1.98E-02 | 0.60       | Down Regulated    |
| 100006857 | LOC100006857     | 1.01E-02 | 0.71       | Down Regulated    |
| 100006858 | csnk1e           | 8.68E-03 | 0.81       | Down Regulated    |
| 100006895 | LOC100006895     | 5.04E-04 | 0.88       | Down Regulated    |
| 100007164 | si:rp71-1g18.10  | 2.91E-02 | 0.60       | Down Regulated    |
| 100007304 | LOC100007304     | 1.18E-03 | 0.79       | Down Regulated    |
| 100008101 | nr4a2a           | 2.49E-02 | 0.82       | Down Regulated    |
| 100034631 | si:dkeyp-39e9.3  | 1.44E-02 | 0.89       | Down Regulated    |
| 100101642 | ralgps1          | 2.87E-02 | 1.03       | Down Regulated    |
| 100101649 | zgc:165647       | 1.13E-02 | 0.70       | Down Regulated    |
| 100126805 | zgc:173905       | 1.81E-03 | 0.60       | Down Regulated    |
| 100126812 | pnpla8           | 9.33E-03 | 0.57       | Down Regulated    |
| 100149357 | rims1a           | 2.19E-02 | 0.59       | Down Regulated    |
| 100149670 | cdk19            | 2.91E-02 | 0.92       | Down Regulated    |
| 100149996 | LOC100149996     | 1.23E-02 | 0.69       | Down Regulated    |
| 100150414 | LOC100150414     | 8.55E-03 | 0.95       | Down Regulated    |
| 100151220 | map1aa           | 8.47E-03 | 0.53       | Down Regulated    |
| 100151347 | fb06f03          | 2.26E-03 | 0.51       | Down Regulated    |
| 100170805 | si:dkey-6n6.7    | 2.60E-02 | 0.61       | Down Regulated    |
| 100307098 | si:dkey-246l19.2 | 8.75E-04 | 0.52       | Down Regulated    |
| 100319240 | serp2            | 2.15E-02 | 0.89       | Down Regulated    |
| 100329926 | LOC100329926     | 1.36E-02 | 0.63       | Down Regulated    |
| 100330023 | slitrk5          | 2.25E-02 | 0.99       | Down Regulated    |
| 100330524 | LOC100330524     | 2.55E-03 | 1.25       | Down Regulated    |
| 100331262 | LOC100331262     | 2.75E-02 | 0.78       | Down Regulated    |
| 100331387 | LOC100331387     | 9.86E-03 | 0.96       | Down Regulated    |
| 100331916 | LOC100331916     | 6.25E-03 | 1.04       | Down Regulated    |
| 100331925 | LOC100331925     | 6.88E-03 | 0.81       | Down Regulated    |
| 100332125 | LOC100332125     | 1.06E-02 | 0.62       | Down Regulated    |
| 100333211 | zfhx3            | 3.65E-03 | 0.56       | Down Regulated    |
| 100333238 | LOC100333238     | 6.98E-03 | 0.60       | Down Regulated    |
| 100333537 | ephb1            | 2.04E-02 | 0.58       | Down Regulated    |
| 100333973 | LOC100333973     | 2.39E-02 | 0.93       | Down Regulated    |
| 100334620 | LOC100334620     | 2.25E-02 | 0.64       | Down Regulated    |
| 100498671 | ccdc88ab         | 8.64E-03 | 1.03       | Down Regulated    |
